# Supplementary material for: Unraveling the role of Ctla-4 in intestinal immune homeostasis through a novel Zebrafish model of inflammatory bowel disease
Source: eLife journal article supplement (doi:10.7554/elife.101932), 2024-09-25
Supplement: fig1-data1 [file elife-101932-fig1-data1-v1.zip]

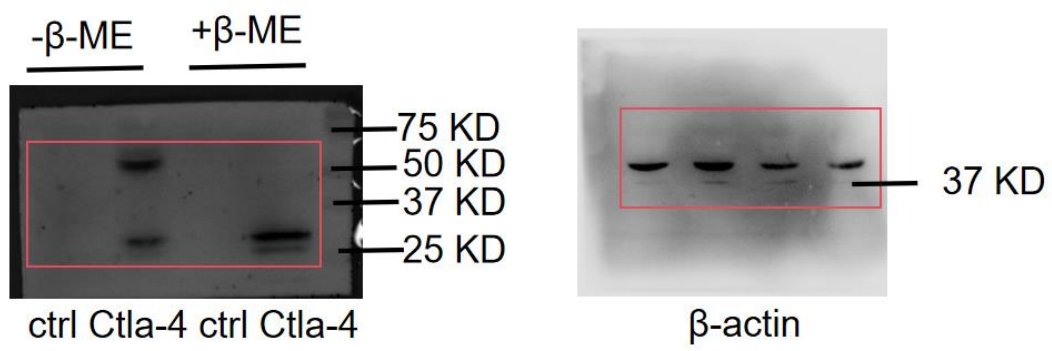

**Figure 1-Source Data 1.** PDF file containing original western blots for Figure 1C, indicating the relevant bands and treatments.
