# Supplementary material for: Unraveling the role of Ctla-4 in intestinal immune homeostasis through a novel Zebrafish model of inflammatory bowel disease
Source: eLife journal article supplement (doi:10.7554/elife.101932), 2024-09-25
Supplement: fig2-data1 [file elife-101932-fig2-data1-v1.pdf]

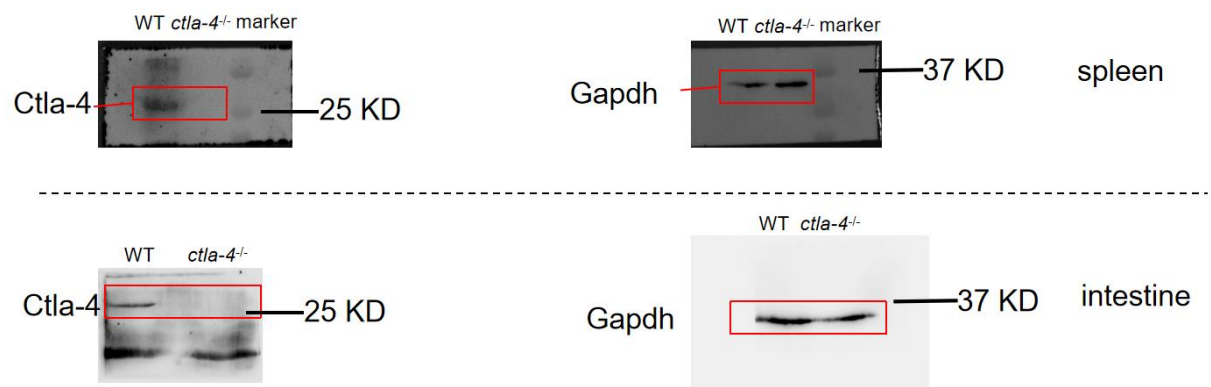

**Figure 2-Source Data 1.** PDF file containing original western blots for Figure 2C, indicating the relevant bands and treatments.
