# Supplementary material for: Unraveling the role of Ctla-4 in intestinal immune homeostasis through a novel Zebrafish model of inflammatory bowel disease
Source: eLife journal article supplement (doi:10.7554/elife.101932), 2024-09-25
Supplement: fig7-data1 [file elife-101932-fig7-data1-v1.pdf]

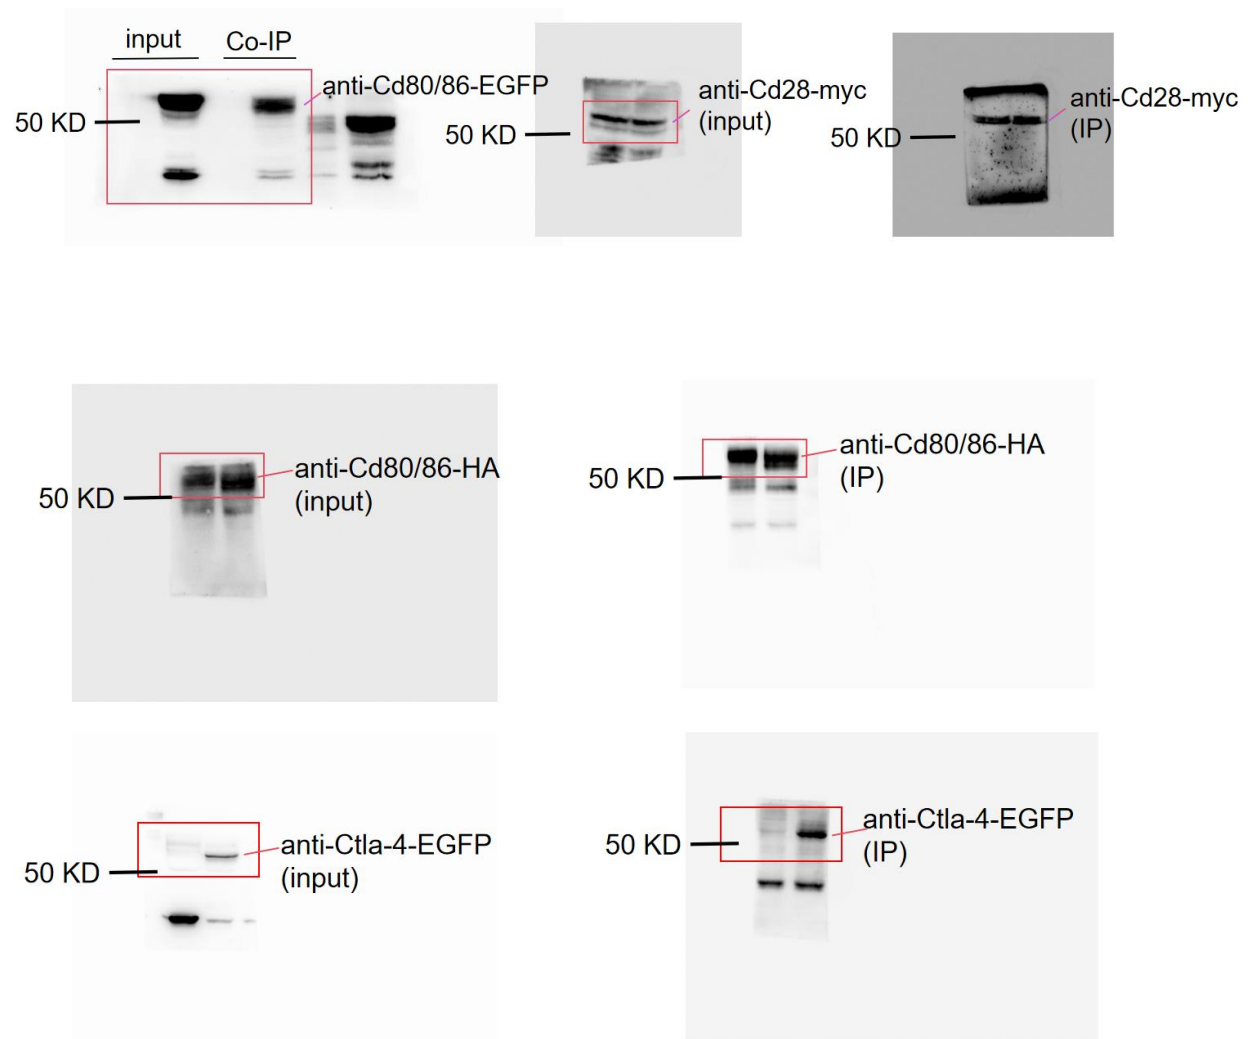

**Figure 7-Source Data 1.** PDF file containing original western blots for Figure 7H, indicating the relevant bands. The interaction between Cd80/86 and Cd28 (up), and Cd80/86 and Ctla-4 (down) were verified by Co-IP.
