# Supplementary material for: Unraveling the role of Ctla-4 in intestinal immune homeostasis through a novel Zebrafish model of inflammatory bowel disease
Source: eLife journal article supplement (doi:10.7554/elife.101932), 2024-09-25
Supplement: fig7-figsupp1-data1 [file elife-101932-fig7-figsupp1-data1-v1.pdf]

A

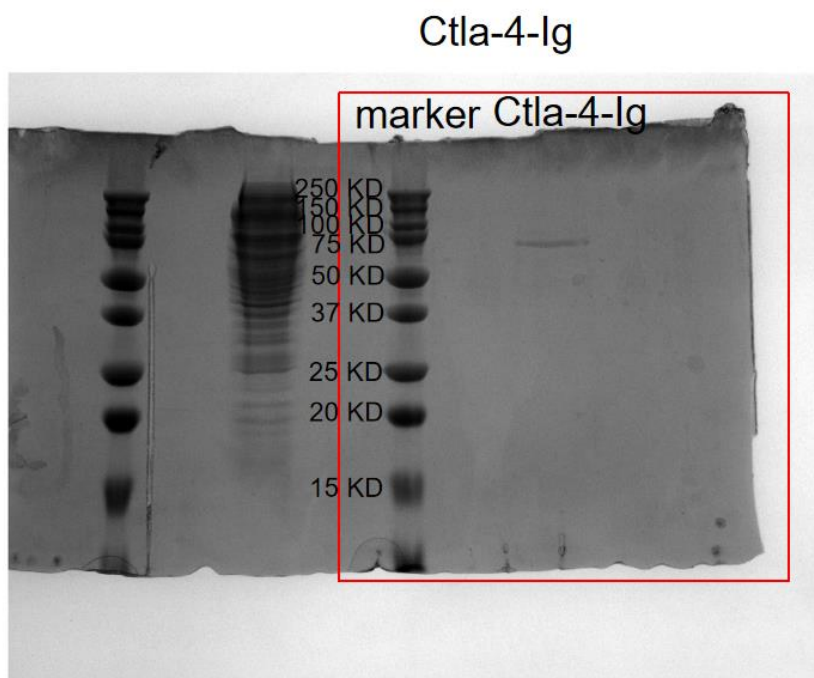

B

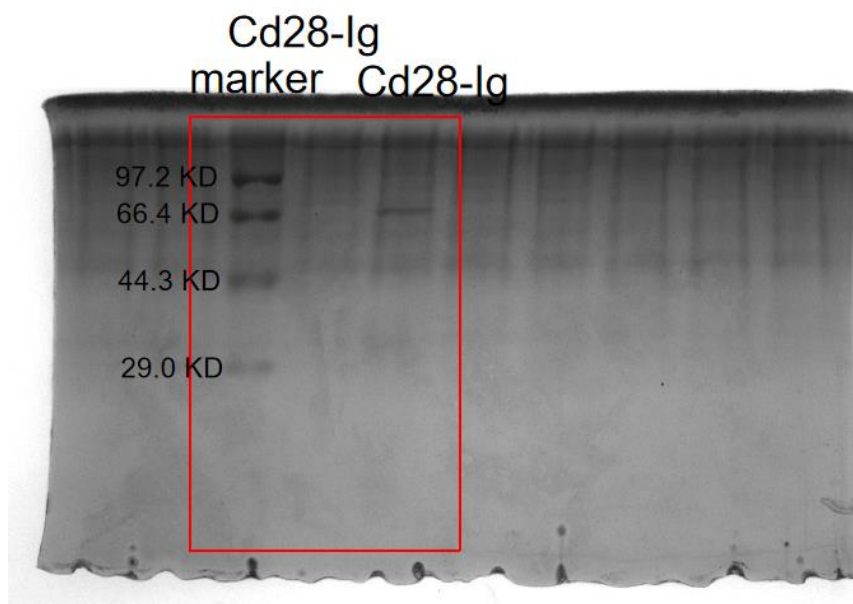

C

## Cd80/86 (ECD)

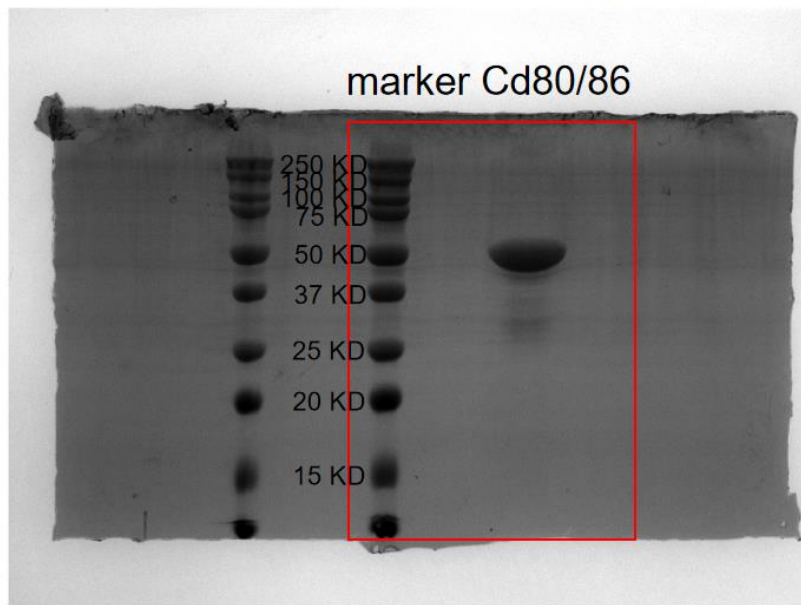

**Figure 7-figure supplement 1-Source Data 1.** PDF file containing original western blots for Figure 7-figure supplement 1A-C. SDS-PAGE detection of the purified recombinant soluble Ctla-4-Ig (sCtla-4) (A) and sCd28-Ig (B) proteins and the Cd80/86 extracellular domain (ECD) (C) with Coomassie brilliant blue staining.
