# Supplementary material for: Unraveling the role of Ctla-4 in intestinal immune homeostasis through a novel Zebrafish model of inflammatory bowel disease
Source: eLife. 2025 May 20;13:RP101932. doi: 10.7554/eLife.101932 (PMC12092003; doi:10.7554/eLife.101932)
Supplement: Supplementary file 3. [file elife-101932-supp3.xlsx]

## Sheet: cell categories annotation
Gene sets for cell categories annotation (scRNA-seq analysis)
Cluster 0: Enterocytes
Ensemble ID	Gene name
ENSDARG00000006427	fabp2
ENSDARG00000061355	aoc1
ENSDARG00000041083	anpepa
ENSDARG00000098791	cdhr5b
ENSDARG00000039272	pls1
Cluster 1: Enteroendocrine cells
Ensemble ID	Gene name
ENSDARG00000019566	neurod1
ENSDARG00000087704	gfra3
ENSDARG00000070480	agr2
ENSDARG00000058475	ern2
	muc2.2
Cluster 2: B cells
Ensemble ID	Gene name
ENSDARG00000096301	ighv1-4
ENSDARG00000078975	igl1c3
ENSDARG00000012694	ighv5-1
ENSDARG00000037473	cd79a
Cluster 3: T/NK/ILC-like cells
Ensemble ID	Gene name
ENSDARG00000078970	il7r
ENSDARG00000102525	lck
ENSDARG00000077240	cd247l
ENSDARG00000015752	zap70
ENSDARG00000077809	il13
ENSDARG00000087909	il4
ENSDARG00000062510	bcl11ba
Cluster 4: Neutrophils
Ensemble ID	Gene name
ENSDARG00000019521	mpx
ENSDARG00000057789	lyz
ENSDARG00000021339	cpa5
ENSDARG00000074782	adgrg3
Cluster 5: macrophages
Ensemble ID	Gene name
ENSDARG00000090649	ly86
ENSDARG00000055290	mpeg1.1
ENSDARG00000089362	grn1
ENSDARG00000013771	ctss2.2
ENSDARG00000025147	cd63

## Sheet: T-NK-ILC-like cell sub-cluster
Gene sets for T/NK/ILC-like cell sub-clusters annotation (scRNA-seq analysis)
Cluster 0: CD8+ T cells
Ensemble ID	Gene name
ENSDARG00000044797	cd8a
ENSDARG00000058682	cd8b
ENSDARG00000090380	gzma
ENSDARG00000028780	gzmk
ENSDARG00000024211	ifng1
ENSDARG00000013598	tnfb
Cluster 1: ILC3-like cells
Ensemble ID	Gene name
ENSDARG00000087195	rorc
ENSDARG00000009511	tnfa
ENSDARG00000028333	nitr9
ENSDARG00000075288	nitr4a
Cluster 2: maturing ccr7+ T cells
Ensemble ID	Gene name
ENSDARG00000044561	ccr7
ENSDARG00000058853	sash1b
ENSDARG00000036215	lcp2b
ENSDARG00000027063	arpc1b
Cluster 3: NKT cells
Ensemble ID	Gene name
ENSDARG00000070668	cd4-1
ENSDARG00000077240	cd247l
ENSDARG00000058673	nkl.2
ENSDARG00000044023	nkl.4
ENSDARG00000098913	faslg
ENSDARG00000030394	prf1.1
Cluster 4: Th2 cells 1
Ensemble ID	Gene name
ENSDARG00000016526	gata3
ENSDARG00000087909	il4
ENSDARG00000077809	il13
ENSDARG00000077240	cd247l
Cluster 5: Th2 cells 2
Ensemble ID	Gene name
ENSDARG00000070668	cd4-1
ENSDARG00000073950	cd4-2.2
ENSDARG00000102525	lck
ENSDARG00000087909	il4
ENSDARG00000016526	gata3

## Sheet: Markergene list of T-NK-ILC-lik
Markergene list of T/NK/ILC-like cell subsets (scRNA-seq analysis)
Target_Cluster	GeneID	GeneName	Target_Cluster_mean	Other_Cluster_mean	log2FC	Pvlaue	Qvalue	Description	GO	KEGG	KO_ENTRY	EC
0	ENSDARG00000105592	CR936442.1	7.12556	1.87213	1.92832	3.74933e-64	9.14498e-60	NA	NA	NA	NA	NA
0	ENSDARG00000041917	ccl38a.4	17.3243	3.75553	2.20571	5.29891e-57	1.29246e-52	chemokine (C-C motif) ligand 38, duplicate 4 [Source:ZFIN;Acc:ZDB-GENE-041014-163]	GO:0005125(cytokine activity);GO:0005576(extracellular region);GO:0005615(extracellular space);GO:0006935(chemotaxis);GO:0006955(immune response);GO:0008009(chemokine activity);GO:0010469(regulation of signaling receptor activity);GO:0060326(cell chemotaxis)	NA	NA	NA
0	ENSDARG00000017860	rgs5b	3.63386	1.05813	1.77999	2.5446e-54	6.20653e-50	regulator of G protein signaling 5b [Source:ZFIN;Acc:ZDB-GENE-050417-359]	NA	NA	K16449	NA
0	ENSDARG00000007823	atf3	14.4857	4.61162	1.65129	1.20218e-51	2.93223e-47	activating transcription factor 3 [Source:ZFIN;Acc:ZDB-GENE-040426-728]	GO:0000978(RNA polymerase II proximal promoter sequence-specific DNA binding);GO:0003677(DNA binding);GO:0003700(DNA-binding transcription factor activity);GO:0005634(nucleus);GO:0006355(regulation of transcription, DNA-templated);GO:0006357(regulation of transcription by RNA polymerase II);GO:0009615(response to virus)	NA	K09032	NA
0	ENSDARG00000098293	si:dkey-27i16.2	24.8533	10.098	1.29938	6.19314e-50	1.51057e-45	si:dkey-27i16.2 [Source:ZFIN;Acc:ZDB-GENE-030131-9667]	GO:0051726(regulation of cell cycle)	NA	NA	NA
0	ENSDARG00000002353	tagapa	23.7054	7.97955	1.57084	1.34809e-47	3.28812e-43	T cell activation RhoGTPase activating protein a [Source:ZFIN;Acc:ZDB-GENE-040426-1877]	GO:0005096(GTPase activator activity);GO:0007165(signal transduction);GO:0043547(positive regulation of GTPase activity)	NA	NA	NA
0	ENSDARG00000097032	si:ch211-256a21.4	4.10503	1.56697	1.38942	4.45096e-45	1.08563e-40	si:ch211-256a21.4 [Source:ZFIN;Acc:ZDB-GENE-131121-329]	GO:0016020(membrane);GO:0016021(integral component of membrane)	NA	NA	NA
0	ENSDARG00000101767	si:dkey-183i3.6	7.885	3.88655	1.02062	8.64919e-41	2.10962e-36	si:dkey-183i3.6 [Source:ZFIN;Acc:ZDB-GENE-141212-342]	GO:0016020(membrane);GO:0016021(integral component of membrane)	NA	NA	NA
0	ENSDARG00000041835	ccl38a.5	11.0056	1.89453	2.53833	3.11996e-40	7.60988e-36	chemokine (C-C motif) ligand 38, duplicate 5 [Source:ZFIN;Acc:ZDB-GENE-041014-167]	GO:0002548(monocyte chemotaxis);GO:0005125(cytokine activity);GO:0005576(extracellular region);GO:0005615(extracellular space);GO:0006935(chemotaxis);GO:0006954(inflammatory response);GO:0006955(immune response);GO:0007186(G protein-coupled receptor signaling pathway);GO:0008009(chemokine activity);GO:0010469(regulation of signaling receptor activity);GO:0030593(neutrophil chemotaxis);GO:0043547(…	NA	NA	NA
0	ENSDARG00000091233	FP236356.1	2.73313	1.24456	1.13492	1.41489e-38	3.45106e-34	NA	NA	NA	NA	NA
0	ENSDARG00000062621	satb1b	1.16584	0.591249	0.979526	1.81611e-36	4.42967e-32	SATB homeobox 1b [Source:ZFIN;Acc:ZDB-GENE-030131-7105]	GO:0003677(DNA binding);GO:0006338(chromatin remodeling);GO:0030099(myeloid cell differentiation);GO:0030223(neutrophil differentiation)	NA	K23225	NA
0	ENSDARG00000102912	gpr184	2.66795	1.23234	1.11432	7.99422e-36	1.94987e-31	G protein-coupled receptor 184 [Source:ZFIN;Acc:ZDB-GENE-060929-1218]	GO:0004930(G protein-coupled receptor activity);GO:0005887(integral component of plasma membrane);GO:0007165(signal transduction);GO:0007186(G protein-coupled receptor signaling pathway);GO:0016020(membrane);GO:0016021(integral component of membrane);GO:0035025(positive regulation of Rho protein signal transduction);GO:0051482(positive regulation of cytosolic calcium ion concentration involved in…	NA	NA	NA
0	ENSDARG00000099518	si:ch211-119e14.1	8.46332	4.05876	1.06018	2.05213e-33	5.00536e-29	si:ch211-119e14.1 [Source:ZFIN;Acc:ZDB-GENE-141216-162]	GO:0016020(membrane);GO:0016021(integral component of membrane)	NA	NA	NA
0	ENSDARG00000041923	ccl38.6	11.7261	4.77512	1.29611	2.32742e-32	5.67681e-28	chemokine (C-C motif) ligand 38, duplicate 6 [Source:ZFIN;Acc:ZDB-GENE-041014-165]	GO:0005125(cytokine activity);GO:0005576(extracellular region);GO:0005615(extracellular space);GO:0006935(chemotaxis);GO:0006955(immune response);GO:0008009(chemokine activity);GO:0010469(regulation of signaling receptor activity);GO:0060326(cell chemotaxis)	04060(Cytokine-cytokine receptor interaction)	K16596	NA
0	ENSDARG00000016154	zfp36l1a	5.88638	2.98552	0.979401	2.15535e-31	5.25712e-27	zinc finger protein 36, C3H type-like 1a [Source:ZFIN;Acc:ZDB-GENE-030131-9860]	GO:0003730(mRNA 3'-UTR binding);GO:0005829(cytosol);GO:0046872(metal ion binding);GO:0061158(3'-UTR-mediated mRNA destabilization)	04218(Cellular senescence)	K18753	NA
0	ENSDARG00000027744	gadd45ba	5.50628	2.44179	1.17314	1.16836e-29	2.84974e-25	growth arrest and DNA-damage-inducible, beta a [Source:ZFIN;Acc:ZDB-GENE-040426-1971]	GO:0000185(activation of MAPKKK activity);GO:0001756(somitogenesis);GO:0005634(nucleus);GO:0005737(cytoplasm);GO:0046686(response to cadmium ion);GO:0051597(response to methylmercury);GO:0051726(regulation of cell cycle)	04010(MAPK signaling pathway);04068(FoxO signaling pathway);04110(Cell cycle);04115(p53 signaling pathway);04210(Apoptosis);04218(Cellular senescence)	K04402	NA
0	ENSDARG00000101609	si:dkey-109a10.2	3.24665	1.62846	0.995444	8.58021e-29	2.0928e-24	si:dkey-109a10.2 [Source:ZFIN;Acc:ZDB-GENE-141212-404]	GO:0016020(membrane);GO:0016021(integral component of membrane)	NA	NA	NA
0	ENSDARG00000098626	nitr12	1.19446	0.553647	1.10931	3.40777e-24	8.31189e-20	novel immune-type receptor 12 [Source:ZFIN;Acc:ZDB-GENE-041001-1]	GO:0016020(membrane);GO:0016021(integral component of membrane)	NA	NA	NA
0	ENSDARG00000039269	arg2	14.5363	8.35189	0.799481	2.74364e-23	6.692e-19	arginase 2 [Source:ZFIN;Acc:ZDB-GENE-030131-1334]	GO:0000050(urea cycle);GO:0004053(arginase activity);GO:0005737(cytoplasm);GO:0006525(arginine metabolic process);GO:0016787(hydrolase activity);GO:0016813(hydrolase activity, acting on carbon-nitrogen (but not peptide) bonds, in linear amidines);GO:0019547(arginine catabolic process to ornithine);GO:0030145(manganese ion binding);GO:0046872(metal ion binding)	00220(Arginine biosynthesis);00330(Arginine and proline metabolism)	K01476	EC:3.5.3.1
0	ENSDARG00000094643	ms4a17c.1	0.948354	0.531183	0.836217	3.02237e-23	7.37186e-19	membrane-spanning 4-domains, subfamily A, member 17C.1 [Source:ZFIN;Acc:ZDB-GENE-080829-9]	GO:0016020(membrane);GO:0016021(integral component of membrane)	NA	K22190	NA
0	ENSDARG00000103980	ets2	8.00704	4.31809	0.890874	3.36786e-23	8.21455e-19	v-ets avian erythroblastosis virus E26 oncogene homolog 2 [Source:ZFIN;Acc:ZDB-GENE-050522-552]	GO:0000981(DNA-binding transcription factor activity, RNA polymerase II-specific);GO:0003677(DNA binding);GO:0003700(DNA-binding transcription factor activity);GO:0005634(nucleus);GO:0006355(regulation of transcription, DNA-templated);GO:0006357(regulation of transcription by RNA polymerase II);GO:0030154(cell differentiation);GO:0043565(sequence-specific DNA binding)	NA	K21932	NA
0	ENSDARG00000056438	her9	5.99339	2.20137	1.44497	6.0997e-23	1.48778e-18	hairy-related 9 [Source:ZFIN;Acc:ZDB-GENE-011213-1]	GO:0000977(RNA polymerase II regulatory region sequence-specific DNA binding);GO:0001756(somitogenesis);GO:0003677(DNA binding);GO:0003714(transcription corepressor activity);GO:0005634(nucleus);GO:0006355(regulation of transcription, DNA-templated);GO:0007219(Notch signaling pathway);GO:0008134(transcription factor binding);GO:0030154(cell differentiation);GO:0043565(sequence-specific DNA bindin…	03460(Fanconi anemia pathway);04330(Notch signaling pathway)	K06054	NA
0	ENSDARG00000000460	nitr2b	2.04686	0.84148	1.28241	7.84651e-23	1.91384e-18	novel immune-type receptor 2b [Source:ZFIN;Acc:ZDB-GENE-001106-6]	GO:0016020(membrane);GO:0016021(integral component of membrane)	NA	NA	NA
0	ENSDARG00000090612	FO904898.3	0.847598	0.463526	0.870732	1.91802e-22	4.67825e-18	uncharacterized LOC100006557 [Source:NCBI gene;Acc:100006557]	GO:0016020(membrane);GO:0016021(integral component of membrane)	NA	NA	NA
0	ENSDARG00000031745	si:busm1-266f07.2	7.06266	4.17409	0.758751	8.53181e-22	2.08099e-17	si:busm1-266f07.2 [Source:ZFIN;Acc:ZDB-GENE-030616-436]	GO:0006955(immune response);GO:0016020(membrane);GO:0016021(integral component of membrane);GO:0019882(antigen processing and presentation);GO:0042613(MHC class II protein complex)	04145(Phagosome);04514(Cell adhesion molecules (CAMs));04672(Intestinal immune network for IgA production);05168(Herpes simplex virus 1 infection)	K06752	NA
0	ENSDARG00000095102	si:ch211-132g1.4	1.19276	0.698805	0.771336	3.32334e-21	8.10596e-17	si:ch211-132g1.4 [Source:ZFIN;Acc:ZDB-GENE-090313-26]	GO:0016020(membrane);GO:0016021(integral component of membrane)	NA	NA	NA
0	ENSDARG00000090380	gzma	0.545694	0.354888	0.620726	1.28046e-19	3.12316e-15	granzyme A [Source:ZFIN;Acc:ZDB-GENE-091204-156]	GO:0004252(serine-type endopeptidase activity);GO:0006508(proteolysis)	NA	K08663	EC:3.4.21.-
0	ENSDARG00000103720	zgc:162730	11.2817	5.89631	0.936097	2.95226e-19	7.20085e-15	zgc:162730 [Source:ZFIN;Acc:ZDB-GENE-030131-6366]	GO:0003730(mRNA 3'-UTR binding);GO:0005829(cytosol);GO:0046872(metal ion binding);GO:0061158(3'-UTR-mediated mRNA destabilization)	NA	NA	NA
0	ENSDARG00000063921	mt-nd5	6.00183	3.7636	0.67329	7.19582e-19	1.75513e-14	NADH dehydrogenase 5, mitochondrial [Source:ZFIN;Acc:ZDB-GENE-011205-12]	GO:0005739(mitochondrion);GO:0005743(mitochondrial inner membrane);GO:0008137(NADH dehydrogenase (ubiquinone) activity);GO:0016020(membrane);GO:0016021(integral component of membrane);GO:0042773(ATP synthesis coupled electron transport);GO:0055114(oxidation-reduction process);GO:0070469(respirasome)	00190(Oxidative phosphorylation)	K03883	EC:7.1.1.2
0	ENSDARG00000044129	si:ch211-214p16.1	25.5681	20.2353	0.33747	1.54843e-18	3.77678e-14	si:ch211-214p16.1 [Source:NCBI gene;Acc:368901]	NA	NA	NA	NA
0	ENSDARG00000094295	CR855337.1	1.73554	1.02731	0.756518	2.57221e-18	6.27387e-14	KIAA0040 ortholog [Source:NCBI gene;Acc:100536987]	NA	NA	NA	NA
0	ENSDARG00000110878	si:dkey-28k24.2.1	0.970503	0.597422	0.699982	1.22484e-17	2.9875e-13	si:dkey-28k24.2 [Source:ZFIN;Acc:ZDB-GENE-121213-4]	GO:0000166(nucleotide binding);GO:0005515(protein binding);GO:0005524(ATP binding);GO:0005737(cytoplasm);GO:0035556(intracellular signal transduction)	NA	NA	NA
0	ENSDARG00000045391	cd226	0.299561	0.232379	0.366372	3.26748e-17	7.96972e-13	CD226 molecule [Source:ZFIN;Acc:ZDB-GENE-070112-1322]	GO:0001816(cytokine production);GO:0002729(positive regulation of natural killer cell cytokine production);GO:0002860(positive regulation of natural killer cell mediated cytotoxicity directed against tumor cell target);GO:0002891(positive regulation of immunoglobulin mediated immune response);GO:0009897(external side of plasma membrane);GO:0016020(membrane);GO:0016021(integral component of membra…	04514(Cell adhesion molecules (CAMs))	K06567	NA
0	ENSDARG00000098108	dusp2	51.4138	29.6358	0.794816	4.63046e-17	1.12942e-12	dual specificity phosphatase 2 [Source:ZFIN;Acc:ZDB-GENE-040801-188]	GO:0000188(inactivation of MAPK activity);GO:0004721(phosphoprotein phosphatase activity);GO:0004725(protein tyrosine phosphatase activity);GO:0005634(nucleus);GO:0005737(cytoplasm);GO:0006470(protein dephosphorylation);GO:0008138(protein tyrosine/serine/threonine phosphatase activity);GO:0016311(dephosphorylation);GO:0016787(hydrolase activity);GO:0016791(phosphatase activity);GO:0017017(MAP kin…	04010(MAPK signaling pathway)	K04459	3.1.3.48;EC:3.1.3.16
0	ENSDARG00000089043	ptpn6	1.85302	1.07441	0.786331	4.7797e-17	1.16582e-12	protein tyrosine phosphatase, non-receptor type 6 [Source:ZFIN;Acc:ZDB-GENE-030131-7513]	GO:0004721(phosphoprotein phosphatase activity);GO:0004725(protein tyrosine phosphatase activity);GO:0005737(cytoplasm);GO:0006470(protein dephosphorylation);GO:0016311(dephosphorylation);GO:0016787(hydrolase activity);GO:0016791(phosphatase activity);GO:0035335(peptidyl-tyrosine dephosphorylation);GO:0045087(innate immune response)	04520(Adherens junction)	K05697	EC:3.1.3.48
0	ENSDARG00000075723	si:dkey-242e21.3	0.530946	0.373105	0.508982	1.46132e-16	3.56432e-12	si:dkey-242e21.3 [Source:ZFIN;Acc:ZDB-GENE-100922-110]	GO:0005044(scavenger receptor activity);GO:0006898(receptor-mediated endocytosis);GO:0009897(external side of plasma membrane);GO:0016020(membrane);GO:0016021(integral component of membrane)	NA	NA	NA
0	ENSDARG00000007358	cxcr3.1.1	0.771042	0.442407	0.801436	1.5437e-16	3.76524e-12	chemokine (C-X-C motif) receptor 3, tandem duplicate 1 [Source:ZFIN;Acc:ZDB-GENE-060130-38]	GO:0002685(regulation of leukocyte migration);GO:0004930(G protein-coupled receptor activity);GO:0004950(chemokine receptor activity);GO:0006935(chemotaxis);GO:0006954(inflammatory response);GO:0006955(immune response);GO:0007165(signal transduction);GO:0007186(G protein-coupled receptor signaling pathway);GO:0007204(positive regulation of cytosolic calcium ion concentration);GO:0009897(external …	04060(Cytokine-cytokine receptor interaction)	K04188	NA
0	ENSDARG00000100301	CABZ01065328.2	0.761152	0.437121	0.800154	1.6054e-16	3.91573e-12	uncharacterized LOC100535756 [Source:NCBI gene;Acc:100535756]	GO:0016020(membrane);GO:0016021(integral component of membrane)	NA	NA	NA
0	ENSDARG00000036628	cd74b	12.9299	8.43973	0.615439	1.82349e-16	4.44767e-12	CD74 molecule, major histocompatibility complex, class II invariant chain b [Source:ZFIN;Acc:ZDB-GENE-990910-10]	GO:0005623(cell);GO:0006886(intracellular protein transport);GO:0006955(immune response);GO:0016020(membrane);GO:0016021(integral component of membrane);GO:0019882(antigen processing and presentation);GO:0042289(MHC class II protein binding);GO:0048839(inner ear development);GO:0048884(neuromast development)	NA	NA	NA
0	ENSDARG00000009087	cd74a	18.3733	12.7665	0.525251	8.07212e-16	1.96887e-11	CD74 molecule, major histocompatibility complex, class II invariant chain a [Source:ZFIN;Acc:ZDB-GENE-000901-1]	GO:0002286(T cell activation involved in immune response);GO:0002468(dendritic cell antigen processing and presentation);GO:0006886(intracellular protein transport);GO:0006955(immune response);GO:0009986(cell surface);GO:0016020(membrane);GO:0016021(integral component of membrane);GO:0019882(antigen processing and presentation);GO:0042289(MHC class II protein binding);GO:0048839(inner ear develop…	05168(Herpes simplex virus 1 infection)	K06505	NA
0	ENSDARG00000011334	ncaldb	2.92819	1.77739	0.720247	1.20809e-15	2.94665e-11	neurocalcin delta b [Source:ZFIN;Acc:ZDB-GENE-040808-37]	GO:0005509(calcium ion binding);GO:0005575(cellular_component);GO:0046872(metal ion binding);GO:0048841(regulation of axon extension involved in axon guidance)	NA	NA	NA
0	ENSDARG00000009779	mcl1a	50.3363	36.7299	0.454642	1.368e-15	3.33668e-11	MCL1, BCL2 family apoptosis regulator a [Source:ZFIN;Acc:ZDB-GENE-000511-7]	GO:0001894(tissue homeostasis);GO:0005741(mitochondrial outer membrane);GO:0007088(regulation of mitotic nuclear division);GO:0008630(intrinsic apoptotic signaling pathway in response to DNA damage);GO:0016020(membrane);GO:0016021(integral component of membrane);GO:0042803(protein homodimerization activity);GO:0042981(regulation of apoptotic process);GO:0043009(chordate embryonic development);GO:…	04210(Apoptosis)	K02539	NA
0	ENSDARG00000042826	egr2b	0.953782	0.523253	0.86615	2.00388e-15	4.88766e-11	early growth response 2b [Source:ZFIN;Acc:ZDB-GENE-980526-283]	GO:0003676(nucleic acid binding);GO:0003677(DNA binding);GO:0005634(nucleus);GO:0046872(metal ion binding)	04625(C-type lectin receptor signaling pathway)	K12496	NA
0	ENSDARG00000063912	mt-co3	152.394	100.336	0.60297	2.24193e-15	5.4683e-11	cytochrome c oxidase III, mitochondrial [Source:ZFIN;Acc:ZDB-GENE-011205-16]	GO:0004129(cytochrome-c oxidase activity);GO:0005739(mitochondrion);GO:0005743(mitochondrial inner membrane);GO:0006123(mitochondrial electron transport, cytochrome c to oxygen);GO:0009055(electron transfer activity);GO:0009060(aerobic respiration);GO:0015002(heme-copper terminal oxidase activity);GO:0015453(oxidoreduction-driven active transmembrane transporter activity);GO:0016020(membrane);GO:…	00190(Oxidative phosphorylation);04260(Cardiac muscle contraction)	K02262	NA
0	ENSDARG00000063908	mt-co2	205.101	134.266	0.611245	2.3623e-15	5.76189e-11	cytochrome c oxidase II, mitochondrial [Source:ZFIN;Acc:ZDB-GENE-011205-15]	GO:0004129(cytochrome-c oxidase activity);GO:0005507(copper ion binding);GO:0005739(mitochondrion);GO:0005743(mitochondrial inner membrane);GO:0016020(membrane);GO:0016021(integral component of membrane);GO:0016491(oxidoreductase activity);GO:0022900(electron transport chain);GO:0042773(ATP synthesis coupled electron transport);GO:0045277(respiratory chain complex IV);GO:0046872(metal ion binding…	00190(Oxidative phosphorylation);04260(Cardiac muscle contraction)	K02261	NA
0	ENSDARG00000053136	b2m	71.9535	54.6164	0.397731	2.97213e-15	7.24933e-11	beta-2-microglobulin [Source:ZFIN;Acc:ZDB-GENE-980526-88]	GO:0002376(immune system process);GO:0002474(antigen processing and presentation of peptide antigen via MHC class I);GO:0002755(MyD88-dependent toll-like receptor signaling pathway);GO:0004672(protein kinase activity);GO:0005515(protein binding);GO:0005524(ATP binding);GO:0005576(extracellular region);GO:0006468(protein phosphorylation);GO:0006955(immune response);GO:0007165(signal transduction);…	05168(Herpes simplex virus 1 infection)	K08055	NA
0	ENSDARG00000003835	stom	1.00565	0.674741	0.575715	7.53501e-15	1.83786e-10	stomatin [Source:ZFIN;Acc:ZDB-GENE-980526-486]	GO:0003674(molecular_function);GO:0005887(integral component of plasma membrane);GO:0016020(membrane);GO:0016021(integral component of membrane)	NA	K17286	NA
0	ENSDARG00000037421	egr1	5.30731	2.52259	1.07307	7.6084e-15	1.85576e-10	early growth response 1 [Source:ZFIN;Acc:ZDB-GENE-980526-320]	GO:0000981(DNA-binding transcription factor activity, RNA polymerase II-specific);GO:0003676(nucleic acid binding);GO:0003677(DNA binding);GO:0005634(nucleus);GO:0005737(cytoplasm);GO:0006357(regulation of transcription by RNA polymerase II);GO:0008270(zinc ion binding);GO:0010385(double-stranded methylated DNA binding);GO:0032922(circadian regulation of gene expression);GO:0043010(camera-type ey…	04371(Apelin signaling pathway);04912(GnRH signaling pathway);04933(AGE-RAGE signaling pathway in diabetic complications)	K09203	NA
0	ENSDARG00000080337	NC-002333.4	312.894	214.122	0.547241	8.41473e-15	2.05244e-10	NA	NA	NA	NA	NA
0	ENSDARG00000009881	ier5	5.68523	3.9578	0.522521	8.65258e-15	2.11045e-10	immediate early response 5 [Source:ZFIN;Acc:ZDB-GENE-030616-127]	GO:0003674(molecular_function);GO:0005575(cellular_component);GO:0008150(biological_process)	NA	NA	NA
0	ENSDARG00000003754	tspan2a	0.543008	0.383001	0.503623	2.15371e-14	5.25311e-10	tetraspanin 2a [Source:ZFIN;Acc:ZDB-GENE-050522-511]	GO:0003674(molecular_function);GO:0005887(integral component of plasma membrane);GO:0007166(cell surface receptor signaling pathway);GO:0016020(membrane);GO:0016021(integral component of membrane)	NA	K17354	NA
0	ENSDARG00000043243	prkchb	0.706637	0.490176	0.527667	3.33383e-14	8.13153e-10	protein kinase C, eta, b [Source:ZFIN;Acc:ZDB-GENE-041001-104]	GO:0000166(nucleotide binding);GO:0004672(protein kinase activity);GO:0004674(protein serine/threonine kinase activity);GO:0004697(protein kinase C activity);GO:0005524(ATP binding);GO:0006468(protein phosphorylation);GO:0016301(kinase activity);GO:0016310(phosphorylation);GO:0016740(transferase activity);GO:0018105(peptidyl-serine phosphorylation);GO:0035556(intracellular signal transduction);GO…	NA	NA	NA
0	ENSDARG00000089327	BX120005.1	3.61312	1.95994	0.882434	5.14722e-14	1.25546e-09	cytotoxic and regulatory T-cell molecule [Source:NCBI gene;Acc:101884219]	GO:0016020(membrane);GO:0016021(integral component of membrane)	NA	K16361	NA
0	ENSDARG00000010844	kras	1.63793	1.07692	0.604972	7.01793e-14	1.71174e-09	v-Ki-ras2 Kirsten rat sarcoma viral oncogene homolog [Source:ZFIN;Acc:ZDB-GENE-040808-67]	GO:0000166(nucleotide binding);GO:0003924(GTPase activity);GO:0005525(GTP binding);GO:0007165(signal transduction);GO:0007507(heart development);GO:0016020(membrane);GO:0030097(hemopoiesis);GO:0048701(embryonic cranial skeleton morphogenesis)	04010(MAPK signaling pathway);04012(ErbB signaling pathway);04068(FoxO signaling pathway);04137(Mitophagy - animal);04140(Autophagy - animal);04150(mTOR signaling pathway);04210(Apoptosis);04218(Cellular senescence);04370(VEGF signaling pathway);04371(Apelin signaling pathway);04540(Gap junction);04625(C-type lectin receptor signaling pathway);04810(Regulation of actin cytoskeleton);04910(Insulin…	K07827	NA
0	ENSDARG00000036754	hmgn3	2.5965	1.72485	0.5901	4.4527e-13	1.08606e-08	high mobility group nucleosomal binding domain 3 [Source:ZFIN;Acc:ZDB-GENE-041114-180]	GO:0000785(chromatin);GO:0003682(chromatin binding);GO:0005634(nucleus);GO:0031492(nucleosomal DNA binding);GO:0045944(positive regulation of transcription by RNA polymerase II);GO:0061178(regulation of insulin secretion involved in cellular response to glucose stimulus)	NA	K11301	NA
0	ENSDARG00000067847	il21	1.4723	0.756138	0.961349	4.58875e-13	1.11924e-08	interleukin 21 [Source:ZFIN;Acc:ZDB-GENE-120510-4]	GO:0005126(cytokine receptor binding);GO:0005615(extracellular space);GO:0006955(immune response)	04060(Cytokine-cytokine receptor interaction)	K05434	NA
0	ENSDARG00000042940	nab1a	5.31608	3.24547	0.711932	5.75126e-13	1.40279e-08	NGFI-A binding protein 1a (EGR1 binding protein 1) [Source:ZFIN;Acc:ZDB-GENE-050208-574]	GO:0005634(nucleus);GO:0006355(regulation of transcription, DNA-templated);GO:0045892(negative regulation of transcription, DNA-templated);GO:0140110(transcription regulator activity)	NA	K22388	NA
0	ENSDARG00000077473	mych	1.8304	1.16051	0.657395	8.18855e-13	1.99727e-08	myelocytomatosis oncogene homolog [Source:ZFIN;Acc:ZDB-GENE-030219-51]	GO:0003677(DNA binding);GO:0003700(DNA-binding transcription factor activity);GO:0005634(nucleus);GO:0006355(regulation of transcription, DNA-templated);GO:0014032(neural crest cell development);GO:0046983(protein dimerization activity)	NA	NA	NA
0	ENSDARG00000105423	cd27	0.404023	0.301528	0.422146	9.04316e-13	2.20572e-08	CD27 molecule [Source:ZFIN;Acc:ZDB-GENE-160113-60]	GO:0004888(transmembrane signaling receptor activity);GO:0005515(protein binding);GO:0006915(apoptotic process);GO:0006955(immune response);GO:0007165(signal transduction);GO:0009897(external side of plasma membrane);GO:0016020(membrane);GO:0016021(integral component of membrane);GO:0043027(cysteine-type endopeptidase inhibitor activity involved in apoptotic process);GO:0043154(negative regulatio…	04060(Cytokine-cytokine receptor interaction)	K05144	NA
0	ENSDARG00000094492	si:ch211-284e13.12	1.42104	0.887554	0.679038	1.70692e-12	4.16335e-08	si:ch211-284e13.12 [Source:ZFIN;Acc:ZDB-GENE-060526-158]	GO:0000151(ubiquitin ligase complex);GO:0000209(protein polyubiquitination);GO:0004842(ubiquitin-protein transferase activity);GO:0005737(cytoplasm);GO:0006511(ubiquitin-dependent protein catabolic process);GO:0016567(protein ubiquitination);GO:0016740(transferase activity);GO:0031624(ubiquitin conjugating enzyme binding);GO:0032436(positive regulation of proteasomal ubiquitin-dependent protein c…	NA	NA	NA
0	ENSDARG00000055854	nr4a3	3.90014	2.38263	0.710969	1.86887e-12	4.55837e-08	nuclear receptor subfamily 4, group A, member 3 [Source:ZFIN;Acc:ZDB-GENE-070824-4]	GO:0000977(RNA polymerase II regulatory region sequence-specific DNA binding);GO:0000978(RNA polymerase II proximal promoter sequence-specific DNA binding);GO:0001780(neutrophil homeostasis);GO:0003677(DNA binding);GO:0003700(DNA-binding transcription factor activity);GO:0003707(steroid hormone receptor activity);GO:0004879(nuclear receptor activity);GO:0005634(nucleus);GO:0005667(transcription f…	NA	K08559	NA
0	ENSDARG00000063924	mt-cyb	66.8011	44.9006	0.573137	3.29704e-12	8.04182e-08	cytochrome b, mitochondrial [Source:ZFIN;Acc:ZDB-GENE-011205-17]	GO:0005739(mitochondrion);GO:0005743(mitochondrial inner membrane);GO:0006122(mitochondrial electron transport, ubiquinol to cytochrome c);GO:0008121(ubiquinol-cytochrome-c reductase activity);GO:0009055(electron transfer activity);GO:0016020(membrane);GO:0016021(integral component of membrane);GO:0016491(oxidoreductase activity);GO:0022904(respiratory electron transport chain);GO:0045275(respira…	00190(Oxidative phosphorylation);04260(Cardiac muscle contraction)	K00412	NA
0	ENSDARG00000063895	mt-nd1	25.7115	16.2153	0.665056	3.80991e-12	9.29275e-08	NADH dehydrogenase 1, mitochondrial [Source:ZFIN;Acc:ZDB-GENE-011205-7]	GO:0003954(NADH dehydrogenase activity);GO:0005739(mitochondrion);GO:0005743(mitochondrial inner membrane);GO:0005747(mitochondrial respiratory chain complex I);GO:0009060(aerobic respiration);GO:0016020(membrane);GO:0016021(integral component of membrane);GO:0055114(oxidation-reduction process);GO:0070469(respirasome)	00190(Oxidative phosphorylation)	K03878	EC:7.1.1.2
0	ENSDARG00000063914	mt-nd3	14.9571	10.185	0.554383	3.87327e-12	9.4473e-08	NADH dehydrogenase 3, mitochondrial [Source:ZFIN;Acc:ZDB-GENE-011205-9]	GO:0005739(mitochondrion);GO:0005747(mitochondrial respiratory chain complex I);GO:0008137(NADH dehydrogenase (ubiquinone) activity);GO:0016020(membrane);GO:0016021(integral component of membrane);GO:0030964(NADH dehydrogenase complex);GO:0031966(mitochondrial membrane);GO:0055114(oxidation-reduction process);GO:0070469(respirasome)	00190(Oxidative phosphorylation)	K03880	EC:7.1.1.2
0	ENSDARG00000036282	rnaset2	1.40378	0.995316	0.496095	4.01322e-12	9.78865e-08	ribonuclease T2 [Source:ZFIN;Acc:ZDB-GENE-030131-2513]	GO:0003723(RNA binding);GO:0004518(nuclease activity);GO:0004519(endonuclease activity);GO:0004521(endoribonuclease activity);GO:0005576(extracellular region);GO:0005764(lysosome);GO:0005783(endoplasmic reticulum);GO:0005788(endoplasmic reticulum lumen);GO:0006401(RNA catabolic process);GO:0016075(rRNA catabolic process);GO:0016787(hydrolase activity);GO:0033897(ribonuclease T2 activity);GO:00432…	NA	K01166	EC:4.6.1.19
0	ENSDARG00000076800	tnfrsf18	8.38265	5.61252	0.578757	4.41603e-12	1.07711e-07	tumor necrosis factor receptor superfamily, member 18 [Source:ZFIN;Acc:ZDB-GENE-101104-7]	GO:0005031(tumor necrosis factor-activated receptor activity);GO:0005515(protein binding);GO:0005887(integral component of plasma membrane);GO:0016020(membrane);GO:0016021(integral component of membrane);GO:0033209(tumor necrosis factor-mediated signaling pathway);GO:0043066(negative regulation of apoptotic process)	04060(Cytokine-cytokine receptor interaction)	K05154	NA
0	ENSDARG00000052826	runx3	6.65003	4.33821	0.616261	7.41103e-12	1.80762e-07	runt-related transcription factor 3 [Source:ZFIN;Acc:ZDB-GENE-000605-2]	GO:0000981(DNA-binding transcription factor activity, RNA polymerase II-specific);GO:0002062(chondrocyte differentiation);GO:0003677(DNA binding);GO:0003700(DNA-binding transcription factor activity);GO:0005524(ATP binding);GO:0005634(nucleus);GO:0006355(regulation of transcription, DNA-templated);GO:0006357(regulation of transcription by RNA polymerase II);GO:0030097(hemopoiesis);GO:0030182(neur…	NA	K09279	NA
0	ENSDARG00000061544	ano6	1.12955	0.765315	0.561616	7.52906e-12	1.83641e-07	anoctamin 6 [Source:ZFIN;Acc:ZDB-GENE-081104-64]	GO:0002040(sprouting angiogenesis);GO:0002407(dendritic cell chemotaxis);GO:0007596(blood coagulation);GO:0016020(membrane);GO:0016021(integral component of membrane);GO:0030501(positive regulation of bone mineralization);GO:0034767(positive regulation of ion transmembrane transport);GO:0046983(protein dimerization activity);GO:0061588(calcium activated phospholipid scrambling);GO:1902476(chlorid…	NA	K19500	NA
0	ENSDARG00000079985	nrip2	0.33521	0.261225	0.359774	1.14726e-11	2.79827e-07	nuclear receptor interacting protein 2 [Source:ZFIN;Acc:ZDB-GENE-030131-9425]	GO:0004190(aspartic-type endopeptidase activity);GO:0006508(proteolysis)	NA	K13215	NA
0	ENSDARG00000100055	tox2	3.00303	1.99389	0.590834	1.20619e-11	2.94201e-07	TOX high mobility group box family member 2 [Source:ZFIN;Acc:ZDB-GENE-040426-2095]	GO:0003677(DNA binding);GO:0005634(nucleus);GO:0072357(PTW/PP1 phosphatase complex)	NA	NA	NA
0	ENSDARG00000071578	si:ch211-222k6.3	1.78657	1.2309	0.537474	1.26015e-11	3.07363e-07	si:ch211-222k6.3 [Source:ZFIN;Acc:ZDB-GENE-050208-567]	GO:0016020(membrane);GO:0016021(integral component of membrane)	NA	NA	NA
0	ENSDARG00000004875	tmc6b	0.803844	0.584458	0.459816	1.46259e-11	3.5674e-07	transmembrane channel-like 6b [Source:ZFIN;Acc:ZDB-GENE-040718-460]	GO:0003674(molecular_function);GO:0005216(ion channel activity);GO:0005887(integral component of plasma membrane);GO:0008150(biological_process);GO:0008381(mechanosensitive ion channel activity);GO:0016020(membrane);GO:0016021(integral component of membrane);GO:0034220(ion transmembrane transport);GO:0055085(transmembrane transport)	NA	NA	NA
0	ENSDARG00000063911	mt-atp6	89.0006	55.7903	0.673801	1.82936e-11	4.46199e-07	ATP synthase 6, mitochondrial [Source:ZFIN;Acc:ZDB-GENE-011205-18]	GO:0005739(mitochondrion);GO:0005743(mitochondrial inner membrane);GO:0005753(mitochondrial proton-transporting ATP synthase complex);GO:0006754(ATP biosynthetic process);GO:0006811(ion transport);GO:0015078(proton transmembrane transporter activity);GO:0015986(ATP synthesis coupled proton transport);GO:0016020(membrane);GO:0016021(integral component of membrane);GO:0045259(proton-transporting AT…	00190(Oxidative phosphorylation)	K02126	NA
0	ENSDARG00000010619	themis	0.828183	0.563122	0.556501	2.31392e-11	5.64388e-07	thymocyte selection associated [Source:ZFIN;Acc:ZDB-GENE-041008-160]	GO:0002250(adaptive immune response);GO:0002376(immune system process);GO:0003674(molecular_function);GO:0005634(nucleus);GO:0005737(cytoplasm);GO:0007275(multicellular organism development);GO:0043368(positive T cell selection);GO:0043383(negative T cell selection);GO:0050852(T cell receptor signaling pathway)	NA	NA	NA
0	ENSDARG00000077557	nitr5	1.63407	1.00491	0.701404	2.75533e-11	6.72053e-07	novel immune-type receptor 5 [Source:ZFIN;Acc:ZDB-GENE-020225-40]	GO:0016020(membrane);GO:0016021(integral component of membrane)	NA	NA	NA
0	ENSDARG00000012450	vmp1	9.84027	5.33943	0.882012	3.56151e-11	8.68687e-07	vacuole membrane protein 1 [Source:ZFIN;Acc:ZDB-GENE-030131-8733]	GO:0016020(membrane);GO:0016021(integral component of membrane)	04140(Autophagy - animal)	K21248	NA
0	ENSDARG00000097646	BX511021.2	0.41161	0.306033	0.427592	3.82742e-11	9.33545e-07	NA	NA	NA	NA	NA
0	ENSDARG00000089307	pmaip1	2.73067	1.82728	0.579557	4.18361e-11	1.02043e-06	phorbol-12-myristate-13-acetate-induced protein 1 [Source:ZFIN;Acc:ZDB-GENE-070119-3]	GO:0001836(release of cytochrome c from mitochondria);GO:0005575(cellular_component);GO:0006915(apoptotic process);GO:0006919(activation of cysteine-type endopeptidase activity involved in apoptotic process);GO:0006974(cellular response to DNA damage stimulus);GO:0007088(regulation of mitotic nuclear division);GO:0042981(regulation of apoptotic process);GO:0043065(positive regulation of apoptotic…	04115(p53 signaling pathway);04210(Apoptosis)	K10131	NA
0	ENSDARG00000090889	si:ch211-132p1.3	3.1033	2.04037	0.604972	4.34123e-11	1.05887e-06	si:ch211-132p1.3 [Source:ZFIN;Acc:ZDB-GENE-130530-1010]	NA	NA	NA	NA
0	ENSDARG00000017446	camk1db	0.844062	0.58245	0.535213	6.24744e-11	1.52381e-06	calcium/calmodulin-dependent protein kinase 1Db [Source:ZFIN;Acc:ZDB-GENE-070112-1872]	GO:0000166(nucleotide binding);GO:0004672(protein kinase activity);GO:0004674(protein serine/threonine kinase activity);GO:0004683(calmodulin-dependent protein kinase activity);GO:0005516(calmodulin binding);GO:0005524(ATP binding);GO:0005829(cytosol);GO:0006468(protein phosphorylation);GO:0016301(kinase activity);GO:0016310(phosphorylation);GO:0043009(chordate embryonic development)	04020(Calcium signaling pathway)	K08794	EC:2.7.11.17
0	ENSDARG00000090159	BX005105.1	1.19836	0.807849	0.568898	8.47904e-11	2.06812e-06	lysosomal associated membrane protein 3 [Source:NCBI gene;Acc:100003043]	NA	NA	NA	NA
0	ENSDARG00000093214	si:ch211-284e13.9	2.0619	1.52624	0.433992	9.58215e-11	2.33718e-06	si:ch211-284e13.9 [Source:ZFIN;Acc:ZDB-GENE-060526-164]	GO:0000151(ubiquitin ligase complex);GO:0000209(protein polyubiquitination);GO:0004842(ubiquitin-protein transferase activity);GO:0005737(cytoplasm);GO:0006511(ubiquitin-dependent protein catabolic process);GO:0016567(protein ubiquitination);GO:0016740(transferase activity);GO:0031624(ubiquitin conjugating enzyme binding);GO:0032436(positive regulation of proteasomal ubiquitin-dependent protein c…	NA	NA	NA
0	ENSDARG00000117594	CR848749.2	1.58631	0.950946	0.738236	1.00168e-10	2.44319e-06	NA	NA	NA	NA	NA
0	ENSDARG00000008186	syk	4.99716	3.91147	0.353398	1.17305e-10	2.86118e-06	spleen tyrosine kinase [Source:ZFIN;Acc:ZDB-GENE-040702-3]	GO:0000166(nucleotide binding);GO:0001946(lymphangiogenesis);GO:0004672(protein kinase activity);GO:0004713(protein tyrosine kinase activity);GO:0004715(non-membrane spanning protein tyrosine kinase activity);GO:0005524(ATP binding);GO:0005737(cytoplasm);GO:0006468(protein phosphorylation);GO:0016301(kinase activity);GO:0016310(phosphorylation);GO:0016740(transferase activity);GO:0018108(peptidyl…	04625(C-type lectin receptor signaling pathway);05168(Herpes simplex virus 1 infection)	K05855	EC:2.7.10.2
0	ENSDARG00000063899	mt-nd2	15.1667	9.65331	0.651811	1.64191e-10	4.00479e-06	NADH dehydrogenase 2, mitochondrial [Source:ZFIN;Acc:ZDB-GENE-011205-8]	GO:0005739(mitochondrion);GO:0005743(mitochondrial inner membrane);GO:0006120(mitochondrial electron transport, NADH to ubiquinone);GO:0008137(NADH dehydrogenase (ubiquinone) activity);GO:0016020(membrane);GO:0016021(integral component of membrane);GO:0055114(oxidation-reduction process);GO:0070469(respirasome)	00190(Oxidative phosphorylation)	K03879	EC:7.1.1.2
0	ENSDARG00000090401	CABZ01020840.1	1.37794	0.925554	0.574123	1.75966e-10	4.29198e-06	apoptosis facilitator Bcl-2-like protein 14 [Source:NCBI gene;Acc:101885512]	GO:0042981(regulation of apoptotic process)	NA	NA	NA
0	ENSDARG00000043447	gpr55a	0.505973	0.375138	0.431638	2.32041e-10	5.65972e-06	G protein-coupled receptor 55a [Source:ZFIN;Acc:ZDB-GENE-051113-260]	GO:0004930(G protein-coupled receptor activity);GO:0005887(integral component of plasma membrane);GO:0007186(G protein-coupled receptor signaling pathway);GO:0016020(membrane);GO:0016021(integral component of membrane);GO:0035025(positive regulation of Rho protein signal transduction);GO:0051482(positive regulation of cytosolic calcium ion concentration involved in phospholipase C-activating G pr…	NA	NA	NA
0	ENSDARG00000007018	ms4a17a.6	0.588805	0.427344	0.462392	3.27669e-10	7.99217e-06	membrane-spanning 4-domains, subfamily A, member 17A.6 [Source:ZFIN;Acc:ZDB-GENE-070209-265]	GO:0016020(membrane);GO:0016021(integral component of membrane)	NA	K22190	NA
0	ENSDARG00000058606	sik1	3.82009	2.54933	0.583488	3.84048e-10	9.36732e-06	salt-inducible kinase 1 [Source:ZFIN;Acc:ZDB-GENE-030131-9446]	GO:0004672(protein kinase activity);GO:0004674(protein serine/threonine kinase activity);GO:0005524(ATP binding);GO:0005634(nucleus);GO:0005737(cytoplasm);GO:0006468(protein phosphorylation);GO:0031588(nucleotide-activated protein kinase complex);GO:0032007(negative regulation of TOR signaling);GO:0035556(intracellular signal transduction);GO:0042149(cellular response to glucose starvation)	NA	K19008	EC:2.7.11.1
0	ENSDARG00000063917	mt-nd4	19.4541	13.5693	0.519727	4.63401e-10	1.13028e-05	NADH dehydrogenase 4, mitochondrial [Source:ZFIN;Acc:ZDB-GENE-011205-10]	GO:0003954(NADH dehydrogenase activity);GO:0005739(mitochondrion);GO:0005747(mitochondrial respiratory chain complex I);GO:0006120(mitochondrial electron transport, NADH to ubiquinone);GO:0008137(NADH dehydrogenase (ubiquinone) activity);GO:0009060(aerobic respiration);GO:0015990(electron transport coupled proton transport);GO:0016020(membrane);GO:0016021(integral component of membrane);GO:003196…	00190(Oxidative phosphorylation)	K03881	EC:7.1.1.2
0	ENSDARG00000079575	aff3	0.448359	0.331332	0.436379	6.89432e-10	1.68159e-05	AF4/FMR2 family, member 3 [Source:ZFIN;Acc:ZDB-GENE-030219-193]	GO:0003690(double-stranded DNA binding);GO:0003700(DNA-binding transcription factor activity);GO:0005634(nucleus);GO:0006355(regulation of transcription, DNA-templated);GO:0008023(transcription elongation factor complex);GO:0032783(ELL-EAF complex)	NA	K15195	NA
0	ENSDARG00000086616	cabz01093075.1	1.26354	0.821004	0.622008	9.22165e-10	2.24925e-05	cabz01093075.1 [Source:ZFIN;Acc:ZDB-GENE-160113-9]	GO:0004930(G protein-coupled receptor activity);GO:0004950(chemokine receptor activity);GO:0006935(chemotaxis);GO:0006955(immune response);GO:0007165(signal transduction);GO:0007186(G protein-coupled receptor signaling pathway);GO:0007204(positive regulation of cytosolic calcium ion concentration);GO:0009897(external side of plasma membrane);GO:0016020(membrane);GO:0016021(integral component of m…	NA	NA	NA
0	ENSDARG00000103002	nptna	0.964753	0.656198	0.55603	1.14378e-09	2.7898e-05	neuroplastin a [Source:ZFIN;Acc:ZDB-GENE-030804-7]	GO:0005886(plasma membrane);GO:0007156(homophilic cell adhesion via plasma membrane adhesion molecules);GO:0007411(axon guidance);GO:0016020(membrane);GO:0016021(integral component of membrane);GO:0030424(axon);GO:0048545(response to steroid hormone);GO:0070593(dendrite self-avoidance);GO:0098632(cell-cell adhesion mediator activity)	NA	K22653	NA
0	ENSDARG00000099325	gig2i	0.339816	0.268653	0.33901	1.1988e-09	2.924e-05	grass carp reovirus (GCRV)-induced gene 2i [Source:ZFIN;Acc:ZDB-GENE-120409-1]	GO:0003950(NAD+ ADP-ribosyltransferase activity);GO:0005737(cytoplasm);GO:0051607(defense response to virus)	NA	NA	NA
0	ENSDARG00000063905	mt-co1	97.3114	71.176	0.451219	1.23554e-09	3.01362e-05	cytochrome c oxidase I, mitochondrial [Source:ZFIN;Acc:ZDB-GENE-011205-14]	GO:0004129(cytochrome-c oxidase activity);GO:0005739(mitochondrion);GO:0005743(mitochondrial inner membrane);GO:0005751(mitochondrial respiratory chain complex IV);GO:0006119(oxidative phosphorylation);GO:0006123(mitochondrial electron transport, cytochrome c to oxygen);GO:0009060(aerobic respiration);GO:0015990(electron transport coupled proton transport);GO:0016020(membrane);GO:0016021(integral…	00190(Oxidative phosphorylation);04260(Cardiac muscle contraction)	K02256	EC:1.9.3.1
0	ENSDARG00000095908	sat1a.2	34.7576	27.5519	0.335179	1.67217e-09	4.07859e-05	spermidine/spermine N1-acetyltransferase 1a, duplicate 2 [Source:ZFIN;Acc:ZDB-GENE-040704-4]	GO:0004145(diamine N-acetyltransferase activity);GO:0005515(protein binding);GO:0005575(cellular_component);GO:0008080(N-acetyltransferase activity);GO:0016740(transferase activity);GO:0019809(spermidine binding);GO:0032918(spermidine acetylation)	00330(Arginine and proline metabolism);04216(Ferroptosis)	K00657	EC:2.3.1.57
0	ENSDARG00000074378	junba	9.0771	5.91687	0.617399	2.09168e-09	5.10182e-05	JunB proto-oncogene, AP-1 transcription factor subunit a [Source:ZFIN;Acc:ZDB-GENE-040426-2172]	GO:0000122(negative regulation of transcription by RNA polymerase II);GO:0000790(nuclear chromatin);GO:0000978(RNA polymerase II proximal promoter sequence-specific DNA binding);GO:0000981(DNA-binding transcription factor activity, RNA polymerase II-specific);GO:0001945(lymph vessel development);GO:0003677(DNA binding);GO:0003700(DNA-binding transcription factor activity);GO:0003713(transcription…	NA	K09028	NA
0	ENSDARG00000104635	mhc2b	1.28871	0.884451	0.543076	3.04704e-09	7.43204e-05	major histocompatibility complex class II integral membrane beta chain gene [Source:ZFIN;Acc:ZDB-GENE-030616-319]	GO:0006955(immune response);GO:0016020(membrane);GO:0016021(integral component of membrane);GO:0019882(antigen processing and presentation);GO:0042613(MHC class II protein complex)	04145(Phagosome);04514(Cell adhesion molecules (CAMs));04672(Intestinal immune network for IgA production);05168(Herpes simplex virus 1 infection)	K06752	NA
0	ENSDARG00000043249	irf1b	3.67338	2.53136	0.537196	3.09471e-09	7.54831e-05	interferon regulatory factor 1b [Source:ZFIN;Acc:ZDB-GENE-041114-13]	GO:0000981(DNA-binding transcription factor activity, RNA polymerase II-specific);GO:0002376(immune system process);GO:0003677(DNA binding);GO:0003700(DNA-binding transcription factor activity);GO:0005515(protein binding);GO:0005634(nucleus);GO:0006355(regulation of transcription, DNA-templated);GO:0006357(regulation of transcription by RNA polymerase II);GO:0006915(apoptotic process);GO:0008285(…	04625(C-type lectin receptor signaling pathway)	K09444	NA
0	ENSDARG00000052192	s1pr5b	0.580884	0.417002	0.478196	3.12757e-09	7.62847e-05	sphingosine-1-phosphate receptor 5b [Source:ZFIN;Acc:ZDB-GENE-061201-27]	GO:0003376(sphingosine-1-phosphate receptor signaling pathway);GO:0004930(G protein-coupled receptor activity);GO:0007186(G protein-coupled receptor signaling pathway);GO:0016020(membrane);GO:0016021(integral component of membrane);GO:0038036(sphingosine-1-phosphate receptor activity)	04080(Neuroactive ligand-receptor interaction)	K04295	NA
0	ENSDARG00000102291	eef1da	6.86708	5.24854	0.387783	3.41365e-09	8.32624e-05	eukaryotic translation elongation factor 1 delta a (guanine nucleotide exchange protein) [Source:ZFIN;Acc:ZDB-GENE-040426-2740]	GO:0003746(translation elongation factor activity);GO:0005853(eukaryotic translation elongation factor 1 complex);GO:0006412(translation);GO:0006414(translational elongation)	NA	K15410	NA
0	ENSDARG00000078249	unc13d	3.10472	2.31258	0.424961	3.52925e-09	8.60819e-05	unc-13 homolog D (C. elegans) [Source:ZFIN;Acc:ZDB-GENE-110411-188]	NA	NA	K19728	NA
0	ENSDARG00000093602	si:ch211-93g21.1	1.81248	1.23293	0.555868	3.55013e-09	8.65913e-05	si:ch211-93g21.1 [Source:ZFIN;Acc:ZDB-GENE-060503-703]	GO:0016020(membrane);GO:0016021(integral component of membrane)	NA	NA	NA
0	ENSDARG00000017294	gnai2b	1.00141	0.717908	0.480162	4.01915e-09	9.80312e-05	guanine nucleotide binding protein (G protein), alpha inhibiting activity polypeptide 2b [Source:ZFIN;Acc:ZDB-GENE-030131-5861]	GO:0000166(nucleotide binding);GO:0001664(G protein-coupled receptor binding);GO:0003924(GTPase activity);GO:0005525(GTP binding);GO:0005834(heterotrimeric G-protein complex);GO:0007165(signal transduction);GO:0007186(G protein-coupled receptor signaling pathway);GO:0007188(adenylate cyclase-modulating G protein-coupled receptor signaling pathway);GO:0019001(guanyl nucleotide binding);GO:0031683(…	04261(Adrenergic signaling in cardiomyocytes);04371(Apelin signaling pathway);04540(Gap junction);04914(Progesterone-mediated oocyte maturation);04916(Melanogenesis)	K04630	NA
0	ENSDARG00000006260	tuba8l4	7.01076	5.49539	0.351349	5.46394e-09	0.000133271	tubulin, alpha 8 like 4 [Source:ZFIN;Acc:ZDB-GENE-040426-860]	GO:0000166(nucleotide binding);GO:0000226(microtubule cytoskeleton organization);GO:0000278(mitotic cell cycle);GO:0003924(GTPase activity);GO:0005200(structural constituent of cytoskeleton);GO:0005525(GTP binding);GO:0005737(cytoplasm);GO:0005856(cytoskeleton);GO:0005874(microtubule);GO:0007017(microtubule-based process)	04145(Phagosome);04210(Apoptosis);04530(Tight junction);04540(Gap junction)	K07374	NA
0	ENSDARG00000000796	nr4a1	6.5487	4.14739	0.659004	8.49712e-09	0.000207253	nuclear receptor subfamily 4, group A, member 1 [Source:ZFIN;Acc:ZDB-GENE-040704-11]	GO:0000977(RNA polymerase II regulatory region sequence-specific DNA binding);GO:0000978(RNA polymerase II proximal promoter sequence-specific DNA binding);GO:0003677(DNA binding);GO:0003700(DNA-binding transcription factor activity);GO:0003707(steroid hormone receptor activity);GO:0004879(nuclear receptor activity);GO:0005634(nucleus);GO:0005667(transcription factor complex);GO:0006355(regulatio…	04010(MAPK signaling pathway)	K04465	NA
0	ENSDARG00000060309	srgap3	0.688321	0.499176	0.463533	8.64849e-09	0.000210945	SLIT-ROBO Rho GTPase activating protein 3 [Source:ZFIN;Acc:ZDB-GENE-060524-4]	GO:0005096(GTPase activator activity);GO:0005515(protein binding);GO:0005737(cytoplasm);GO:0007165(signal transduction);GO:0030336(negative regulation of cell migration);GO:0043547(positive regulation of GTPase activity);GO:0048365(Rac GTPase binding)	NA	K07526	NA
0	ENSDARG00000019191	sept12	1.02851	0.811177	0.342474	8.72581e-09	0.000212831	septin 12 [Source:ZFIN;Acc:ZDB-GENE-120215-68]	GO:0000166(nucleotide binding);GO:0003924(GTPase activity);GO:0005525(GTP binding);GO:0005940(septin ring);GO:0015630(microtubule cytoskeleton);GO:0031105(septin complex);GO:0032947(protein-containing complex scaffold activity);GO:0061640(cytoskeleton-dependent cytokinesis)	NA	K16938	NA
0	ENSDARG00000097065	si:ch73-223p23.2	0.417976	0.329191	0.344494	9.52264e-09	0.000232267	si:ch73-223p23.2 [Source:ZFIN;Acc:ZDB-GENE-131121-616]	GO:0016020(membrane);GO:0016021(integral component of membrane)	NA	NA	NA
0	ENSDARG00000082753	NC-002333.17	84.6044	58.879	0.52298	1.61184e-08	0.000393144	NA	NA	NA	NA	NA
0	ENSDARG00000086881	ier2b	4.0483	2.50092	0.694858	1.81821e-08	0.00044348	immediate early response 2b [Source:ZFIN;Acc:ZDB-GENE-030131-8244]	NA	NA	NA	NA
0	ENSDARG00000059836	ddit3	4.77279	3.56011	0.42291	1.95785e-08	0.000477539	DNA-damage-inducible transcript 3 [Source:ZFIN;Acc:ZDB-GENE-070410-90]	GO:0001666(response to hypoxia);GO:0003700(DNA-binding transcription factor activity);GO:0006355(regulation of transcription, DNA-templated);GO:0046890(regulation of lipid biosynthetic process);GO:0070059(intrinsic apoptotic signaling pathway in response to endoplasmic reticulum stress)	NA	NA	NA
0	ENSDARG00000103672	cirbpa	10.8996	8.55113	0.350085	2.01447e-08	0.00049135	cold inducible RNA binding protein a [Source:ZFIN;Acc:ZDB-GENE-050417-329]	GO:0003676(nucleic acid binding);GO:0003723(RNA binding);GO:0003730(mRNA 3'-UTR binding);GO:0005575(cellular_component);GO:0005681(spliceosomal complex);GO:0005737(cytoplasm);GO:0008266(poly(U) RNA binding);GO:0009409(response to cold);GO:0017148(negative regulation of translation);GO:0030371(translation repressor activity);GO:0045727(positive regulation of translation);GO:0048026(positive regula…	NA	K13195	NA
0	ENSDARG00000092746	si:ch211-150o23.2	2.31228	1.69671	0.446574	2.50563e-08	0.000611149	si:ch211-150o23.2 [Source:ZFIN;Acc:ZDB-GENE-060503-386]	GO:0016020(membrane);GO:0016021(integral component of membrane)	NA	NA	NA
0	ENSDARG00000074846	si:dkeyp-68b7.12	4.16434	3.26074	0.352891	2.82191e-08	0.000688292	si:dkeyp-68b7.12 [Source:ZFIN;Acc:ZDB-GENE-141212-333]	GO:0005096(GTPase activator activity);GO:0007165(signal transduction);GO:0007264(small GTPase mediated signal transduction);GO:0043547(positive regulation of GTPase activity)	NA	K20645	NA
0	ENSDARG00000038442	plcg1	0.859277	0.642311	0.419852	3.9089e-08	0.00095342	phospholipase C, gamma 1 [Source:ZFIN;Acc:ZDB-GENE-030421-3]	GO:0001525(angiogenesis);GO:0001570(vasculogenesis);GO:0004435(phosphatidylinositol phospholipase C activity);GO:0005515(protein binding);GO:0005886(plasma membrane);GO:0006629(lipid metabolic process);GO:0007165(signal transduction);GO:0008016(regulation of heart contraction);GO:0008081(phosphoric diester hydrolase activity);GO:0010634(positive regulation of epithelial cell migration);GO:0016042…	00562(Inositol phosphate metabolism);04012(ErbB signaling pathway);04020(Calcium signaling pathway);04070(Phosphatidylinositol signaling system);04370(VEGF signaling pathway);04933(AGE-RAGE signaling pathway in diabetic complications)	K01116	EC:3.1.4.11
0	ENSDARG00000020298	btg2	6.99422	5.062	0.466454	4.17826e-08	0.00101912	B-cell translocation gene 2 [Source:ZFIN;Acc:ZDB-GENE-000210-15]	GO:0005634(nucleus);GO:0005737(cytoplasm);GO:0008285(negative regulation of cell population proliferation);GO:0045930(negative regulation of mitotic cell cycle)	03018(RNA degradation)	K14443	NA
0	ENSDARG00000104882	FP085399.5	4.13237	3.21419	0.362515	4.32111e-08	0.00105396	NA	NA	NA	NA	NA
0	ENSDARG00000005414	grapa	0.466612	0.36049	0.372264	4.9196e-08	0.00119994	GRB2 related adaptor protein a [Source:ZFIN;Acc:ZDB-GENE-050522-347]	GO:0005515(protein binding)	NA	NA	NA
0	ENSDARG00000029866	slc6a14	0.447869	0.347556	0.365831	5.08534e-08	0.00124036	solute carrier family 6 (amino acid transporter), member 14 [Source:ZFIN;Acc:ZDB-GENE-130411-2]	GO:0005328(neurotransmitter:sodium symporter activity);GO:0005886(plasma membrane);GO:0006836(neurotransmitter transport);GO:0015293(symporter activity);GO:0016020(membrane);GO:0016021(integral component of membrane);GO:0055085(transmembrane transport)	NA	K05047	NA
0	ENSDARG00000031768	roraa	2.20416	1.54104	0.516324	5.35688e-08	0.0013066	RAR-related orphan receptor A, paralog a [Source:ZFIN;Acc:ZDB-GENE-060306-2]	GO:0003677(DNA binding);GO:0003700(DNA-binding transcription factor activity);GO:0003707(steroid hormone receptor activity);GO:0004879(nuclear receptor activity);GO:0005634(nucleus);GO:0006355(regulation of transcription, DNA-templated);GO:0007275(multicellular organism development);GO:0008270(zinc ion binding);GO:0010468(regulation of gene expression);GO:0010628(positive regulation of gene expre…	NA	K08532	NA
0	ENSDARG00000094366	si:dkey-260g12.1	1.09559	0.766787	0.51481	5.51447e-08	0.00134503	si:dkey-260g12.1 [Source:ZFIN;Acc:ZDB-GENE-100922-284]	GO:0005515(protein binding);GO:0016020(membrane);GO:0016021(integral component of membrane)	NA	NA	NA
0	ENSDARG00000007693	nfkbiab	14.4907	10.7423	0.431822	5.63512e-08	0.00137446	nuclear factor of kappa light polypeptide gene enhancer in B-cells inhibitor, alpha b [Source:ZFIN;Acc:ZDB-GENE-030131-1819]	GO:0005515(protein binding)	04210(Apoptosis);04620(Toll-like receptor signaling pathway);04621(NOD-like receptor signaling pathway);04622(RIG-I-like receptor signaling pathway);04623(Cytosolic DNA-sensing pathway);04625(C-type lectin receptor signaling pathway);04920(Adipocytokine signaling pathway);05168(Herpes simplex virus 1 infection)	K04734	NA
0	ENSDARG00000016623	si:ch211-195b13.1	2.2367	1.52429	0.553236	5.9462e-08	0.00145034	si:ch211-195b13.1 [Source:ZFIN;Acc:ZDB-GENE-030131-7626]	GO:0000166(nucleotide binding);GO:0004672(protein kinase activity);GO:0004674(protein serine/threonine kinase activity);GO:0005524(ATP binding);GO:0006468(protein phosphorylation);GO:0015459(potassium channel regulator activity);GO:0016301(kinase activity);GO:0016310(phosphorylation);GO:0016740(transferase activity);GO:0018105(peptidyl-serine phosphorylation);GO:0035091(phosphatidylinositol bindi…	NA	NA	NA
0	ENSDARG00000102632	ubc	15.7538	12.6995	0.310921	7.11724e-08	0.00173596	ubiquitin C [Source:ZFIN;Acc:ZDB-GENE-061110-88]	GO:0003674(molecular_function);GO:0005515(protein binding);GO:0005634(nucleus);GO:0005737(cytoplasm);GO:0016567(protein ubiquitination);GO:0019941(modification-dependent protein catabolic process);GO:0031386(protein tag);GO:0031625(ubiquitin protein ligase binding)	03320(PPAR signaling pathway)	K08770	NA
0	ENSDARG00000086842	dap1b	3.53651	2.64579	0.418628	7.36868e-08	0.0017973	death associated protein 1b [Source:ZFIN;Acc:ZDB-GENE-000511-4]	GO:0010507(negative regulation of autophagy);GO:0034198(cellular response to amino acid starvation);GO:0070513(death domain binding);GO:0097190(apoptotic signaling pathway)	NA	NA	NA
0	ENSDARG00000110751	nitr6b.1	0.612152	0.439353	0.478509	8.09804e-08	0.00197519	novel immune-type receptor 6b [Source:ZFIN;Acc:ZDB-GENE-041001-10]	NA	NA	NA	NA
0	ENSDARG00000092878	si:dkeyp-85e10.3	0.868589	0.636702	0.448056	8.70127e-08	0.00212233	si:dkeyp-85e10.3 [Source:ZFIN;Acc:ZDB-GENE-061207-90]	NA	NA	NA	NA
0	ENSDARG00000095451	si:ch211-196l7.4	6.96667	5.33049	0.386201	9.73468e-08	0.00237439	si:ch211-196l7.4 [Source:ZFIN;Acc:ZDB-GENE-050419-122]	NA	NA	NA	NA
0	ENSDARG00000014329	npm1a	4.63224	3.36031	0.463116	1.13776e-07	0.00277511	nucleophosmin 1a [Source:ZFIN;Acc:ZDB-GENE-021028-1]	GO:0003676(nucleic acid binding);GO:0003682(chromatin binding);GO:0005654(nucleoplasm);GO:0005730(nucleolus);GO:0005737(cytoplasm);GO:0006338(chromatin remodeling);GO:0030097(hemopoiesis);GO:0042393(histone binding);GO:0042981(regulation of apoptotic process)	NA	K11276	NA
0	ENSDARG00000090185	si:dkeyp-73b11.8	1.17075	0.865555	0.435739	1.21263e-07	0.00295774	si:dkeyp-73b11.8 [Source:ZFIN;Acc:ZDB-GENE-131120-176]	GO:0004867(serine-type endopeptidase inhibitor activity);GO:0005615(extracellular space);GO:0010951(negative regulation of endopeptidase activity);GO:0016020(membrane);GO:0016021(integral component of membrane)	NA	NA	NA
0	ENSDARG00000105263	ccl36.1	15.709	11.9473	0.394903	1.46075e-07	0.00356291	chemokine (C-C motif) ligand 36, duplicate 1 [Source:ZFIN;Acc:ZDB-GENE-140718-2]	GO:0002548(monocyte chemotaxis);GO:0005125(cytokine activity);GO:0005576(extracellular region);GO:0005615(extracellular space);GO:0006935(chemotaxis);GO:0006954(inflammatory response);GO:0006955(immune response);GO:0007186(G protein-coupled receptor signaling pathway);GO:0008009(chemokine activity);GO:0010469(regulation of signaling receptor activity);GO:0030593(neutrophil chemotaxis);GO:0043547(…	NA	NA	NA
0	ENSDARG00000071499	cxcl32b.1	1.56809	1.02909	0.607642	1.82816e-07	0.00445907	chemokine (C-X-C motif) ligand 32b, duplicate 1 [Source:ZFIN;Acc:ZDB-GENE-140715-4]	GO:0002548(monocyte chemotaxis);GO:0005576(extracellular region);GO:0005615(extracellular space);GO:0006954(inflammatory response);GO:0006955(immune response);GO:0007186(G protein-coupled receptor signaling pathway);GO:0008009(chemokine activity);GO:0030593(neutrophil chemotaxis);GO:0043547(positive regulation of GTPase activity);GO:0048020(CCR chemokine receptor binding);GO:0048247(lymphocyte ch…	NA	NA	NA
0	ENSDARG00000100887	si:dkey-11f4.20	2.79588	1.94126	0.526309	1.86726e-07	0.00455443	si:dkey-11f4.20 [Source:ZFIN;Acc:ZDB-GENE-070912-359]	GO:0016020(membrane);GO:0016021(integral component of membrane)	04514(Cell adhesion molecules (CAMs))	K06449	NA
0	ENSDARG00000015164	mknk2b	9.12852	6.5829	0.471658	2.42174e-07	0.00590686	MAP kinase interacting serine/threonine kinase 2b [Source:ZFIN;Acc:ZDB-GENE-030829-2]	GO:0000166(nucleotide binding);GO:0004672(protein kinase activity);GO:0004674(protein serine/threonine kinase activity);GO:0004683(calmodulin-dependent protein kinase activity);GO:0005516(calmodulin binding);GO:0005524(ATP binding);GO:0005634(nucleus);GO:0005737(cytoplasm);GO:0006468(protein phosphorylation);GO:0009931(calcium-dependent protein serine/threonine kinase activity);GO:0018105(peptidy…	04010(MAPK signaling pathway);04910(Insulin signaling pathway)	K04372	EC:2.7.11.1
0	ENSDARG00000063910	mt-atp8	1.18923	0.876686	0.439893	2.60298e-07	0.00634894	ATP synthase 8, mitochondrial [Source:ZFIN;Acc:ZDB-GENE-011205-19]	GO:0000276(mitochondrial proton-transporting ATP synthase complex, coupling factor F(o));GO:0005739(mitochondrion);GO:0006754(ATP biosynthetic process);GO:0006811(ion transport);GO:0015078(proton transmembrane transporter activity);GO:0015986(ATP synthesis coupled proton transport);GO:0016020(membrane);GO:0016021(integral component of membrane);GO:0031966(mitochondrial membrane);GO:0045263(proton…	00190(Oxidative phosphorylation)	K02125	NA
0	ENSDARG00000042577	batf3	1.06114	0.735055	0.529688	2.7906e-07	0.00680654	basic leucine zipper transcription factor, ATF-like 3 [Source:ZFIN;Acc:ZDB-GENE-041014-356]	GO:0000978(RNA polymerase II proximal promoter sequence-specific DNA binding);GO:0003677(DNA binding);GO:0003700(DNA-binding transcription factor activity);GO:0005634(nucleus);GO:0006355(regulation of transcription, DNA-templated);GO:0006357(regulation of transcription by RNA polymerase II)	NA	K09034	NA
0	ENSDARG00000056481	vat1	0.9613	0.711443	0.434239	3.54583e-07	0.00864864	vesicle amine transport 1 [Source:ZFIN;Acc:ZDB-GENE-030616-178]	GO:0008270(zinc ion binding);GO:0016491(oxidoreductase activity);GO:0048037(cofactor binding);GO:0055114(oxidation-reduction process)	NA	K23167	NA
0	ENSDARG00000036161	hnrnpa0l.1	19.2685	15.506	0.313419	3.57066e-07	0.00870919	heterogeneous nuclear ribonucleoprotein A0, like [Source:ZFIN;Acc:ZDB-GENE-030131-618]	GO:0003676(nucleic acid binding);GO:0003723(RNA binding)	NA	NA	NA
0	ENSDARG00000035719	arl5c	2.4938	1.68949	0.561764	3.73761e-07	0.0091164	ADP-ribosylation factor-like 5C [Source:ZFIN;Acc:ZDB-GENE-040426-1866]	GO:0000166(nucleotide binding);GO:0005525(GTP binding);GO:0005737(cytoplasm);GO:0005802(trans-Golgi network);GO:0006886(intracellular protein transport);GO:0016192(vesicle-mediated transport);GO:1903292(protein localization to Golgi membrane)	NA	NA	NA
0	ENSDARG00000022303	higd1a	9.47066	7.43044	0.350017	4.2528e-07	0.010373	HIG1 hypoxia inducible domain family, member 1A [Source:ZFIN;Acc:ZDB-GENE-030826-15]	GO:0016020(membrane);GO:0016021(integral component of membrane)	NA	NA	NA
0	ENSDARG00000008049	si:dkey-42i9.4	2.18221	1.75165	0.31707	7.21115e-07	0.0175887	si:dkey-42i9.4 [Source:ZFIN;Acc:ZDB-GENE-030131-8398]	GO:0003674(molecular_function);GO:0005575(cellular_component);GO:0005634(nucleus);GO:0005737(cytoplasm);GO:0008150(biological_process);GO:0008285(negative regulation of cell population proliferation);GO:0045930(negative regulation of mitotic cell cycle)	03018(RNA degradation)	K14443	NA
0	ENSDARG00000062510	bcl11ba	0.397465	0.320753	0.309366	7.38688e-07	0.0180173	BCL11B, BAF complex component a [Source:ZFIN;Acc:ZDB-GENE-061207-62]	GO:0003676(nucleic acid binding);GO:0003700(DNA-binding transcription factor activity);GO:0005634(nucleus);GO:0006355(regulation of transcription, DNA-templated);GO:0043565(sequence-specific DNA binding)	NA	K22046	NA
0	ENSDARG00000091411	si:ch211-214p13.9	1.17189	0.765865	0.613671	7.50556e-07	0.0183068	si:ch211-214p13.9 [Source:ZFIN;Acc:ZDB-GENE-060503-213]	GO:0009897(external side of plasma membrane);GO:0016020(membrane);GO:0016021(integral component of membrane);GO:0019815(B cell receptor complex);GO:0030183(B cell differentiation);GO:0050853(B cell receptor signaling pathway)	NA	NA	NA
0	ENSDARG00000061841	tiparp	1.6987	1.25018	0.442293	8.33507e-07	0.0203301	TCDD-inducible poly(ADP-ribose) polymerase [Source:ZFIN;Acc:ZDB-GENE-031002-47]	GO:0003950(NAD+ ADP-ribosyltransferase activity);GO:0005575(cellular_component);GO:0008270(zinc ion binding);GO:0046872(metal ion binding);GO:0071466(cellular response to xenobiotic stimulus)	NA	K15259	EC:2.4.2.30
0	ENSDARG00000081270	rn7sk	6.39865	4.62636	0.467889	8.67943e-07	0.02117	RNA, 7SK small nuclear [Source:ZFIN;Acc:ZDB-GENE-090323-1]	NA	NA	NA	NA
0	ENSDARG00000069961	il21r.1	1.11574	0.857664	0.379513	9.56144e-07	0.0233213	interleukin 21 receptor, tandem duplicate 1 [Source:ZFIN;Acc:ZDB-GENE-080108-6]	GO:0005515(protein binding);GO:0016020(membrane);GO:0016021(integral component of membrane)	04060(Cytokine-cytokine receptor interaction)	K05075	NA
0	ENSDARG00000028335	hmga1a	3.05988	2.42349	0.336388	9.9663e-07	0.0243088	high mobility group AT-hook 1a [Source:ZFIN;Acc:ZDB-GENE-010502-1]	GO:0000785(chromatin);GO:0003677(DNA binding);GO:0005634(nucleus);GO:0006355(regulation of transcription, DNA-templated);GO:0043484(regulation of RNA splicing)	NA	K09282	NA
0	ENSDARG00000104153	prkd4	1.18099	0.931224	0.342802	1.26816e-06	0.0309316	protein kinase D4 [Source:ZFIN;Acc:ZDB-GENE-080204-93]	GO:0000166(nucleotide binding);GO:0004672(protein kinase activity);GO:0004674(protein serine/threonine kinase activity);GO:0004697(protein kinase C activity);GO:0005524(ATP binding);GO:0006468(protein phosphorylation);GO:0016301(kinase activity);GO:0016310(phosphorylation);GO:0016740(transferase activity);GO:0035556(intracellular signal transduction);GO:0046872(metal ion binding);GO:0089700(prote…	NA	NA	NA
0	ENSDARG00000007783	blk	0.749056	0.603115	0.31264	1.35296e-06	0.0330002	BLK proto-oncogene, Src family tyrosine kinase [Source:ZFIN;Acc:ZDB-GENE-040724-106]	GO:0000166(nucleotide binding);GO:0004672(protein kinase activity);GO:0004713(protein tyrosine kinase activity);GO:0004715(non-membrane spanning protein tyrosine kinase activity);GO:0005102(signaling receptor binding);GO:0005515(protein binding);GO:0005524(ATP binding);GO:0006468(protein phosphorylation);GO:0007169(transmembrane receptor protein tyrosine kinase signaling pathway);GO:0016301(kinas…	NA	K08890	EC:2.7.10.2
0	ENSDARG00000017653	rgs13	11.2951	8.372	0.432057	1.43522e-06	0.0350065	regulator of G protein signaling 13 [Source:ZFIN;Acc:ZDB-GENE-070410-138]	NA	NA	K16449	NA
0	ENSDARG00000055900	zswim5	1.6364	1.25663	0.380972	1.46241e-06	0.0356697	zinc finger, SWIM-type containing 5 [Source:ZFIN;Acc:ZDB-GENE-030925-30]	GO:0031462(Cul2-RING ubiquitin ligase complex);GO:1902667(regulation of axon guidance)	NA	NA	NA
0	ENSDARG00000055874	cpe	0.74201	0.55981	0.406501	1.50988e-06	0.0368276	carboxypeptidase E [Source:ZFIN;Acc:ZDB-GENE-090313-68]	GO:0004181(metallocarboxypeptidase activity);GO:0005615(extracellular space);GO:0005794(Golgi apparatus);GO:0006508(proteolysis);GO:0006518(peptide metabolic process);GO:0008270(zinc ion binding);GO:0016485(protein processing);GO:0030070(insulin processing);GO:0030141(secretory granule);GO:0043025(neuronal cell body);GO:0097060(synaptic membrane)	NA	K01294	EC:3.4.17.10
0	ENSDARG00000038672	tcf7	0.360061	0.294747	0.288761	1.5554e-06	0.0379378	transcription factor 7 [Source:ZFIN;Acc:ZDB-GENE-050222-4]	GO:0000978(RNA polymerase II proximal promoter sequence-specific DNA binding);GO:0000981(DNA-binding transcription factor activity, RNA polymerase II-specific);GO:0003677(DNA binding);GO:0003700(DNA-binding transcription factor activity);GO:0005634(nucleus);GO:0005667(transcription factor complex);GO:0006355(regulation of transcription, DNA-templated);GO:0006357(regulation of transcription by RNA…	04310(Wnt signaling pathway);04520(Adherens junction);04916(Melanogenesis)	K02620	NA
0	ENSDARG00000040059	gbp	0.647465	0.502472	0.365759	1.78921e-06	0.0436407	glycogen synthase kinase binding protein [Source:ZFIN;Acc:ZDB-GENE-990714-7]	GO:0005737(cytoplasm);GO:0016301(kinase activity);GO:0016310(phosphorylation)	04310(Wnt signaling pathway)	K03096	NA
0	ENSDARG00000056929	kdm6bb	0.945281	0.698562	0.436355	1.81398e-06	0.0442447	lysine (K)-specific demethylase 6B, b [Source:ZFIN;Acc:ZDB-GENE-040724-166]	GO:0000978(RNA polymerase II proximal promoter sequence-specific DNA binding);GO:0003682(chromatin binding);GO:0005634(nucleus);GO:0007507(heart development);GO:0031101(fin regeneration);GO:0031490(chromatin DNA binding);GO:0043565(sequence-specific DNA binding);GO:0044666(MLL3/4 complex);GO:0046872(metal ion binding);GO:0060319(primitive erythrocyte differentiation);GO:0061384(heart trabecula mo…	NA	K11448	EC:1.14.11.-
0	ENSDARG00000103554	notch1a	0.546692	0.425866	0.360328	1.90961e-06	0.0465774	notch 1a [Source:ZFIN;Acc:ZDB-GENE-990415-173]	GO:0005509(calcium ion binding);GO:0005515(protein binding);GO:0006355(regulation of transcription, DNA-templated);GO:0007219(Notch signaling pathway);GO:0007275(multicellular organism development);GO:0016020(membrane);GO:0016021(integral component of membrane);GO:0030154(cell differentiation);GO:0038023(signaling receptor activity);GO:0050793(regulation of developmental process)	04330(Notch signaling pathway)	K02599	NA
0	ENSDARG00000042725	cebpb	21.3001	15.8703	0.42453	1.99219e-06	0.0485914	CCAAT enhancer binding protein beta [Source:ZFIN;Acc:ZDB-GENE-020111-3]	GO:0001878(response to yeast);GO:0003677(DNA binding);GO:0003700(DNA-binding transcription factor activity);GO:0005634(nucleus);GO:0006355(regulation of transcription, DNA-templated);GO:0009617(response to bacterium);GO:0044030(regulation of DNA methylation)	NA	K10048	NA
0	ENSDARG00000099555	foxo1a	10.4045	7.09387	0.552559	2.12325e-06	0.0517883	forkhead box O1 a [Source:ZFIN;Acc:ZDB-GENE-061013-59]	GO:0000122(negative regulation of transcription by RNA polymerase II);GO:0000981(DNA-binding transcription factor activity, RNA polymerase II-specific);GO:0001945(lymph vessel development);GO:0003677(DNA binding);GO:0003700(DNA-binding transcription factor activity);GO:0005634(nucleus);GO:0005737(cytoplasm);GO:0006355(regulation of transcription, DNA-templated);GO:0008134(transcription factor bin…	04068(FoxO signaling pathway);04218(Cellular senescence);04910(Insulin signaling pathway);04933(AGE-RAGE signaling pathway in diabetic complications)	K07201	NA
0	ENSDARG00000097992	BX005450.1	0.709298	0.533515	0.410864	2.25371e-06	0.0549703	NA	NA	NA	NA	NA
0	ENSDARG00000079105	mhc2dab	2.48502	1.66968	0.573685	2.28476e-06	0.0557276	major histocompatibility complex class II DAB gene [Source:ZFIN;Acc:ZDB-GENE-980526-200]	GO:0003674(molecular_function);GO:0006955(immune response);GO:0016020(membrane);GO:0016021(integral component of membrane);GO:0019882(antigen processing and presentation);GO:0042613(MHC class II protein complex)	04145(Phagosome);04514(Cell adhesion molecules (CAMs));04672(Intestinal immune network for IgA production);05168(Herpes simplex virus 1 infection)	K06752	NA
0	ENSDARG00000029072	klf6a	7.71682	5.93495	0.378772	2.39958e-06	0.0585281	Kruppel-like factor 6a [Source:ZFIN;Acc:ZDB-GENE-021115-9]	GO:0000122(negative regulation of transcription by RNA polymerase II);GO:0000785(chromatin);GO:0000981(DNA-binding transcription factor activity, RNA polymerase II-specific);GO:0001158(enhancer sequence-specific DNA binding);GO:0001227(DNA-binding transcription repressor activity, RNA polymerase II-specific);GO:0001889(liver development);GO:0003676(nucleic acid binding);GO:0003682(chromatin bindi…	NA	K09207	NA
0	ENSDARG00000004301	rhogb	0.827756	0.664318	0.317331	2.46543e-06	0.0601344	ras homolog family member Gb [Source:ZFIN;Acc:ZDB-GENE-030131-8877]	GO:0000166(nucleotide binding);GO:0003924(GTPase activity);GO:0005525(GTP binding);GO:0005622(intracellular);GO:0005737(cytoplasm);GO:0005886(plasma membrane);GO:0005938(cell cortex);GO:0007015(actin filament organization);GO:0007163(establishment or maintenance of cell polarity);GO:0007264(small GTPase mediated signal transduction);GO:0007266(Rho protein signal transduction);GO:0008360(regulatio…	05132(Salmonella infection)	K07863	NA
0	ENSDARG00000042835	tfdp2	0.69512	0.520809	0.416509	2.52559e-06	0.0616016	transcription factor Dp-2 [Source:ZFIN;Acc:ZDB-GENE-030219-104]	GO:0000278(mitotic cell cycle);GO:0000981(DNA-binding transcription factor activity, RNA polymerase II-specific);GO:0003677(DNA binding);GO:0003700(DNA-binding transcription factor activity);GO:0003712(transcription coregulator activity);GO:0005634(nucleus);GO:0005667(transcription factor complex);GO:0006355(regulation of transcription, DNA-templated);GO:0006357(regulation of transcription by RNA…	04110(Cell cycle)	K09392	NA
0	ENSDARG00000104773	junbb	4.95871	3.52091	0.494014	3.36839e-06	0.0821585	JunB proto-oncogene, AP-1 transcription factor subunit b [Source:ZFIN;Acc:ZDB-GENE-040426-2666]	GO:0000122(negative regulation of transcription by RNA polymerase II);GO:0000790(nuclear chromatin);GO:0000978(RNA polymerase II proximal promoter sequence-specific DNA binding);GO:0000981(DNA-binding transcription factor activity, RNA polymerase II-specific);GO:0001945(lymph vessel development);GO:0003677(DNA binding);GO:0003700(DNA-binding transcription factor activity);GO:0003713(transcription…	NA	NA	NA
0	ENSDARG00000016143	xiap	1.16274	0.878206	0.404896	3.50112e-06	0.0853957	X-linked inhibitor of apoptosis [Source:ZFIN;Acc:ZDB-GENE-030825-7]	GO:0005634(nucleus);GO:0005737(cytoplasm);GO:0006915(apoptotic process);GO:0016567(protein ubiquitination);GO:0043027(cysteine-type endopeptidase inhibitor activity involved in apoptotic process);GO:0061630(ubiquitin protein ligase activity);GO:1990001(inhibition of cysteine-type endopeptidase activity involved in apoptotic process)	04120(Ubiquitin mediated proteolysis);04210(Apoptosis);04217(Necroptosis);04510(Focal adhesion);04621(NOD-like receptor signaling pathway)	K04725	EC:2.3.2.27
0	ENSDARG00000006672	fam49a	1.8031	1.34325	0.424749	4.60165e-06	0.112239	family with sequence similarity 49 member A [Source:ZFIN;Acc:ZDB-GENE-031002-50]	GO:0003674(molecular_function);GO:0045580(regulation of T cell differentiation);GO:0048538(thymus development)	NA	NA	NA
0	ENSDARG00000041959	cxcr4b	2.39264	1.74644	0.454187	5.49986e-06	0.134147	chemokine (C-X-C motif), receptor 4b [Source:ZFIN;Acc:ZDB-GENE-010614-1]	GO:0001637(G protein-coupled chemoattractant receptor activity);GO:0001667(ameboidal-type cell migration);GO:0001764(neuron migration);GO:0004930(G protein-coupled receptor activity);GO:0004950(chemokine receptor activity);GO:0005886(plasma membrane);GO:0006935(chemotaxis);GO:0006955(immune response);GO:0007165(signal transduction);GO:0007186(G protein-coupled receptor signaling pathway);GO:00072…	04020(Calcium signaling pathway);04060(Cytokine-cytokine receptor interaction);04144(Endocytosis);04672(Intestinal immune network for IgA production);04810(Regulation of actin cytoskeleton)	K04189	NA
0	ENSDARG00000031756	mef2aa	0.65099	0.519843	0.32456	5.93047e-06	0.14465	myocyte enhancer factor 2aa [Source:ZFIN;Acc:ZDB-GENE-990415-163]	GO:0000790(nuclear chromatin);GO:0000976(transcription regulatory region sequence-specific DNA binding);GO:0000977(RNA polymerase II regulatory region sequence-specific DNA binding);GO:0000978(RNA polymerase II proximal promoter sequence-specific DNA binding);GO:0001756(somitogenesis);GO:0003677(DNA binding);GO:0005634(nucleus);GO:0007507(heart development);GO:0010628(positive regulation of gene …	04371(Apelin signaling pathway)	K09260	NA
0	ENSDARG00000097845	si:ch211-105j21.9	2.50404	1.96355	0.350795	7.57121e-06	0.184669	si:ch211-105j21.9 [Source:ZFIN;Acc:ZDB-GENE-131127-499]	GO:0016020(membrane);GO:0016021(integral component of membrane)	NA	NA	NA
0	ENSDARG00000030981	tmem127	0.566798	0.4472	0.341916	7.83668e-06	0.191144	transmembrane protein 127 [Source:ZFIN;Acc:ZDB-GENE-050522-97]	GO:0003674(molecular_function);GO:0005886(plasma membrane);GO:0008285(negative regulation of cell population proliferation);GO:0016020(membrane);GO:0016021(integral component of membrane);GO:0032007(negative regulation of TOR signaling)	NA	NA	NA
0	ENSDARG00000000656	psmb9a	0.947507	0.771321	0.296806	8.35306e-06	0.203739	proteasome subunit beta 9a [Source:ZFIN;Acc:ZDB-GENE-990415-140]	GO:0000502(proteasome complex);GO:0002376(immune system process);GO:0004175(endopeptidase activity);GO:0004298(threonine-type endopeptidase activity);GO:0005634(nucleus);GO:0005737(cytoplasm);GO:0005839(proteasome core complex);GO:0006508(proteolysis);GO:0008233(peptidase activity);GO:0010498(proteasomal protein catabolic process);GO:0010499(proteasomal ubiquitin-independent protein catabolic pro…	03050(Proteasome)	K02741	EC:3.4.25.1
0	ENSDARG00000069846	zgc:162944	5.40119	4.47603	0.271059	1.01566e-05	0.24773	zgc:162944 [Source:ZFIN;Acc:ZDB-GENE-070424-75]	GO:0003674(molecular_function);GO:0008150(biological_process)	NA	NA	NA
0	ENSDARG00000077383	anxa11a	2.50692	1.94929	0.362966	1.13463e-05	0.276749	annexin A11a [Source:ZFIN;Acc:ZDB-GENE-030707-4]	GO:0005509(calcium ion binding);GO:0005515(protein binding);GO:0005544(calcium-dependent phospholipid binding);GO:0005737(cytoplasm);GO:0006909(phagocytosis);GO:0008429(phosphatidylethanolamine binding);GO:0032506(cytokinetic process);GO:0044548(S100 protein binding);GO:0048306(calcium-dependent protein binding);GO:0051592(response to calcium ion)	NA	K17095	NA
0	ENSDARG00000104636	si:dkey-112a7.4	8.69044	6.97409	0.317423	1.56595e-05	0.381951	si:dkey-112a7.4 [Source:ZFIN;Acc:ZDB-GENE-030131-9661]	GO:0004860(protein kinase inhibitor activity);GO:0006469(negative regulation of protein kinase activity)	NA	NA	NA
0	ENSDARG00000059337	tgif1	3.1075	2.38092	0.384234	1.57174e-05	0.383362	TGFB-induced factor homeobox 1 [Source:ZFIN;Acc:ZDB-GENE-030131-475]	GO:0003677(DNA binding);GO:0005634(nucleus);GO:0006355(regulation of transcription, DNA-templated);GO:0017015(regulation of transforming growth factor beta receptor signaling pathway);GO:0021797(forebrain anterior/posterior pattern specification);GO:0048385(regulation of retinoic acid receptor signaling pathway);GO:0048854(brain morphogenesis);GO:0070654(sensory epithelium regeneration);GO:007209…	04350(TGF-beta signaling pathway)	K19383	NA
0	ENSDARG00000010384	lpar5a	1.18372	0.873692	0.438132	1.58084e-05	0.385583	lysophosphatidic acid receptor 5a [Source:ZFIN;Acc:ZDB-GENE-030131-1193]	GO:0004930(G protein-coupled receptor activity);GO:0007186(G protein-coupled receptor signaling pathway);GO:0016020(membrane);GO:0016021(integral component of membrane)	NA	NA	NA
0	ENSDARG00000018425	ddx61	3.01941	2.51531	0.263531	1.96272e-05	0.478728	DEAD (Asp-Glu-Ala-Asp) box helicase 61 [Source:ZFIN;Acc:ZDB-GENE-030131-6611]	GO:0000166(nucleotide binding);GO:0003676(nucleic acid binding);GO:0004386(helicase activity);GO:0005524(ATP binding);GO:0009408(response to heat);GO:0016787(hydrolase activity);GO:0034063(stress granule assembly);GO:0036464(cytoplasmic ribonucleoprotein granule)	03018(RNA degradation)	K12614	EC:3.6.4.13
0	ENSDARG00000103716	si:busm1-194e12.11	1.3186	1.01069	0.383664	1.96636e-05	0.479615	si:busm1-194e12.11 [Source:ZFIN;Acc:ZDB-GENE-030616-318]	GO:0006955(immune response);GO:0016020(membrane);GO:0016021(integral component of membrane);GO:0019882(antigen processing and presentation);GO:0042613(MHC class II protein complex)	04145(Phagosome);04514(Cell adhesion molecules (CAMs));04672(Intestinal immune network for IgA production);05168(Herpes simplex virus 1 infection)	K06752	NA
0	ENSDARG00000036456	anxa4	3.48804	2.83867	0.297203	2.07595e-05	0.506344	annexin A4 [Source:ZFIN;Acc:ZDB-GENE-030707-1]	GO:0005509(calcium ion binding);GO:0005544(calcium-dependent phospholipid binding)	NA	K17093	NA
0	ENSDARG00000018953	gclm	1.31323	0.989102	0.40893	2.15711e-05	0.52614	glutamate-cysteine ligase, modifier subunit [Source:ZFIN;Acc:ZDB-GENE-030131-5906]	GO:0006750(glutathione biosynthetic process);GO:0017109(glutamate-cysteine ligase complex);GO:0030234(enzyme regulator activity);GO:0035226(glutamate-cysteine ligase catalytic subunit binding);GO:0035229(positive regulation of glutamate-cysteine ligase activity)	00270(Cysteine and methionine metabolism);00480(Glutathione metabolism);04216(Ferroptosis)	K11205	NA
0	ENSDARG00000041919	ccl38.1	0.329932	0.275146	0.26197	2.29269e-05	0.559209	chemokine (C-C motif) ligand 38, duplicate 1 [Source:ZFIN;Acc:ZDB-GENE-041014-320]	GO:0002548(monocyte chemotaxis);GO:0005125(cytokine activity);GO:0005576(extracellular region);GO:0005615(extracellular space);GO:0006935(chemotaxis);GO:0006954(inflammatory response);GO:0006955(immune response);GO:0007186(G protein-coupled receptor signaling pathway);GO:0008009(chemokine activity);GO:0010469(regulation of signaling receptor activity);GO:0030593(neutrophil chemotaxis);GO:0043547(…	NA	NA	NA
0	ENSDARG00000013598	tnfb	3.83333	2.66564	0.524116	2.29334e-05	0.559369	tumor necrosis factor b (TNF superfamily, member 2) [Source:ZFIN;Acc:ZDB-GENE-050601-2]	GO:0001889(liver development);GO:0005125(cytokine activity);GO:0005164(tumor necrosis factor receptor binding);GO:0005515(protein binding);GO:0005615(extracellular space);GO:0006955(immune response);GO:0010469(regulation of signaling receptor activity);GO:0016020(membrane);GO:0016021(integral component of membrane)	04060(Cytokine-cytokine receptor interaction);05168(Herpes simplex virus 1 infection)	K05468	NA
0	ENSDARG00000023299	snu13b	0.987039	0.79189	0.317806	2.35739e-05	0.57499	SNU13 homolog, small nuclear ribonucleoprotein b (U4/U6.U5) [Source:ZFIN;Acc:ZDB-GENE-030131-9670]	GO:0000398(mRNA splicing, via spliceosome);GO:0000470(maturation of LSU-rRNA);GO:0003723(RNA binding);GO:0005730(nucleolus);GO:0031428(box C/D snoRNP complex);GO:0032040(small-subunit processome);GO:0042254(ribosome biogenesis);GO:0046540(U4/U6 x U5 tri-snRNP complex);GO:0061053(somite development);GO:1990904(ribonucleoprotein complex)	03008(Ribosome biogenesis in eukaryotes);03040(Spliceosome)	K12845	NA
0	ENSDARG00000102482	zgc:165573	1.13734	0.871294	0.384429	2.69064e-05	0.656274	zgc:165573 [Source:ZFIN;Acc:ZDB-GENE-070615-27]	GO:0003674(molecular_function);GO:0005886(plasma membrane);GO:0016020(membrane);GO:0016021(integral component of membrane)	NA	NA	NA
0	ENSDARG00000075643	ifi35	1.80131	1.38955	0.374423	2.8715e-05	0.700389	interferon-induced protein 35 [Source:ZFIN;Acc:ZDB-GENE-100311-2]	NA	NA	NA	NA
0	ENSDARG00000021987	plecb	0.689492	0.541048	0.349778	2.92475e-05	0.713375	plectin b [Source:ZFIN;Acc:ZDB-GENE-100917-2]	GO:0003779(actin binding);GO:0005198(structural molecule activity);GO:0005200(structural constituent of cytoskeleton);GO:0005515(protein binding);GO:0005737(cytoplasm);GO:0005856(cytoskeleton);GO:0005882(intermediate filament);GO:0005925(focal adhesion);GO:0007010(cytoskeleton organization);GO:0007519(skeletal muscle tissue development);GO:0007626(locomotory behavior);GO:0008092(cytoskeletal prot…	NA	K10388	NA
0	ENSDARG00000109301	nitr6b.2	1.81412	1.19182	0.606099	3.19777e-05	0.779968	novel immune-type receptor 6b [Source:ZFIN;Acc:ZDB-GENE-041001-10]	GO:0016020(membrane);GO:0016021(integral component of membrane)	NA	NA	NA
0	ENSDARG00000079994	akap13	3.66019	2.84861	0.36166	3.42544e-05	0.835499	A-kinase anchoring protein 13 [Source:ZFIN;Acc:ZDB-GENE-030131-6253]	GO:0005089(Rho guanyl-nucleotide exchange factor activity);GO:0035023(regulation of Rho protein signal transduction);GO:0035556(intracellular signal transduction);GO:0046872(metal ion binding)	NA	K16529	NA
0	ENSDARG00000102471	trak2	0.355881	0.29646	0.263554	4.07407e-05	0.993708	trafficking protein, kinesin binding 2 [Source:ZFIN;Acc:ZDB-GENE-030131-7496]	GO:0005102(signaling receptor binding);GO:0005737(cytoplasm);GO:0005739(mitochondrion);GO:0006605(protein targeting);GO:0008089(anterograde axonal transport);GO:0008104(protein localization);GO:0017022(myosin binding);GO:0022008(neurogenesis);GO:0030425(dendrite);GO:0031410(cytoplasmic vesicle);GO:0032839(dendrite cytoplasm);GO:0047496(vesicle transport along microtubule);GO:0048311(mitochondrion…	NA	NA	NA
0	ENSDARG00000079762	si:dkey-253d23.4	0.373047	0.303274	0.298735	4.16486e-05	1	si:dkey-253d23.4 [Source:ZFIN;Acc:ZDB-GENE-050208-730]	GO:0016020(membrane);GO:0016021(integral component of membrane)	NA	NA	NA
0	ENSDARG00000013704	cers2a	0.423267	0.35072	0.271247	4.18955e-05	1	ceramide synthase 2a [Source:ZFIN;Acc:ZDB-GENE-020808-2]	GO:0003677(DNA binding);GO:0005634(nucleus);GO:0005783(endoplasmic reticulum);GO:0016020(membrane);GO:0016021(integral component of membrane);GO:0046513(ceramide biosynthetic process);GO:0050291(sphingosine N-acyltransferase activity)	00600(Sphingolipid metabolism)	K04710	EC:2.3.1.24
0	ENSDARG00000020693	sesn1	0.797873	0.599102	0.413358	4.4973e-05	1	sestrin 1 [Source:ZFIN;Acc:ZDB-GENE-040718-408]	GO:0003674(molecular_function);GO:0005634(nucleus);GO:0005737(cytoplasm);GO:0007368(determination of left/right symmetry);GO:0016239(positive regulation of macroautophagy);GO:0016684(oxidoreductase activity, acting on peroxide as acceptor);GO:0031932(TORC2 complex);GO:0055114(oxidation-reduction process);GO:0061700(GATOR2 complex);GO:0070728(leucine binding);GO:0071230(cellular response to amino …	04115(p53 signaling pathway)	K10141	NA
0	ENSDARG00000104398	si:ch73-343g19.4	1.70461	1.16026	0.554992	5.10568e-05	1	si:ch73-343g19.4 [Source:ZFIN;Acc:ZDB-GENE-100922-108]	GO:0016020(membrane);GO:0016021(integral component of membrane)	NA	NA	NA
0	ENSDARG00000099465	rnf213a	2.19665	1.81611	0.274452	5.27814e-05	1	ring finger protein 213a [Source:ZFIN;Acc:ZDB-GENE-050302-100]	GO:0001525(angiogenesis);GO:0002040(sprouting angiogenesis);GO:0004842(ubiquitin-protein transferase activity);GO:0005737(cytoplasm);GO:0005829(cytosol);GO:0006511(ubiquitin-dependent protein catabolic process);GO:0008015(blood circulation);GO:0016567(protein ubiquitination);GO:0016740(transferase activity);GO:0016787(hydrolase activity);GO:0016887(ATPase activity);GO:0046872(metal ion binding)	NA	K22754	EC:2.3.2.27
0	ENSDARG00000063916	mt-nd4l	1.08548	0.861946	0.332659	5.31653e-05	1	NADH dehydrogenase 4L, mitochondrial [Source:ZFIN;Acc:ZDB-GENE-011205-11]	GO:0005739(mitochondrion);GO:0005747(mitochondrial respiratory chain complex I);GO:0008137(NADH dehydrogenase (ubiquinone) activity);GO:0016020(membrane);GO:0016021(integral component of membrane);GO:0016651(oxidoreductase activity, acting on NAD(P)H);GO:0030964(NADH dehydrogenase complex);GO:0031966(mitochondrial membrane);GO:0042773(ATP synthesis coupled electron transport);GO:0055114(oxidation…	00190(Oxidative phosphorylation)	K03882	EC:7.1.1.2
0	ENSDARG00000105615	si:ch211-196f2.6	2.27624	1.78376	0.351734	5.74084e-05	1	si:ch211-196f2.6 [Source:ZFIN;Acc:ZDB-GENE-160728-85]	GO:0016020(membrane);GO:0016021(integral component of membrane)	NA	NA	NA
0	ENSDARG00000002758	dedd1	2.34584	1.80972	0.374338	6.96708e-05	1	death effector domain-containing 1 [Source:ZFIN;Acc:ZDB-GENE-000616-2]	GO:0003677(DNA binding);GO:0005515(protein binding);GO:0005730(nucleolus);GO:0006915(apoptotic process);GO:0008625(extrinsic apoptotic signaling pathway via death domain receptors);GO:0042981(regulation of apoptotic process)	NA	NA	NA
0	ENSDARG00000022904	skilb	0.54349	0.445043	0.288308	8.81363e-05	1	SKI-like proto-oncogene b [Source:ZFIN;Acc:ZDB-GENE-080723-40]	GO:0000122(negative regulation of transcription by RNA polymerase II);GO:0030512(negative regulation of transforming growth factor beta receptor signaling pathway);GO:0030514(negative regulation of BMP signaling pathway);GO:0045596(negative regulation of cell differentiation);GO:0046332(SMAD binding);GO:0048666(neuron development)	NA	NA	NA
0	ENSDARG00000079167	si:ch211-230g15.5	1.26832	0.956661	0.406837	8.81762e-05	1	si:ch211-230g15.5 [Source:ZFIN;Acc:ZDB-GENE-091204-280]	GO:0005515(protein binding)	NA	NA	NA
0	ENSDARG00000020483	lta	0.527174	0.413463	0.350519	9.00674e-05	1	lymphotoxin alpha (TNF superfamily, member 1) [Source:ZFIN;Acc:ZDB-GENE-050601-3]	GO:0002237(response to molecule of bacterial origin);GO:0005164(tumor necrosis factor receptor binding);GO:0005515(protein binding);GO:0006955(immune response);GO:0016020(membrane);GO:0016021(integral component of membrane);GO:0032496(response to lipopolysaccharide);GO:0043330(response to exogenous dsRNA)	NA	NA	NA
0	ENSDARG00000090728	tnfrsf9b	15.4826	12.396	0.320769	9.79201e-05	1	tumor necrosis factor receptor superfamily, member 9b [Source:ZFIN;Acc:ZDB-GENE-101109-2]	GO:0005515(protein binding);GO:0016020(membrane);GO:0016021(integral component of membrane)	04060(Cytokine-cytokine receptor interaction)	K05146	NA
0	ENSDARG00000101813	nap1l1	1.19159	0.990473	0.2667	0.000113179	1	nucleosome assembly protein 1-like 1 [Source:ZFIN;Acc:ZDB-GENE-030516-2]	GO:0001878(response to yeast);GO:0005634(nucleus);GO:0006334(nucleosome assembly)	NA	K11279	NA
0	ENSDARG00000071261	zmp:0000001139	0.778782	0.630446	0.304846	0.000114551	1	zmp:0000001139 [Source:ZFIN;Acc:ZDB-GENE-140106-99]	GO:0016020(membrane);GO:0016021(integral component of membrane)	NA	NA	NA
0	ENSDARG00000014439	dgkza	1.09777	0.861302	0.349979	0.000117464	1	diacylglycerol kinase, zeta a [Source:ZFIN;Acc:ZDB-GENE-111104-3]	GO:0000166(nucleotide binding);GO:0003951(NAD+ kinase activity);GO:0004143(diacylglycerol kinase activity);GO:0005515(protein binding);GO:0005524(ATP binding);GO:0005634(nucleus);GO:0007165(signal transduction);GO:0007205(protein kinase C-activating G protein-coupled receptor signaling pathway);GO:0016301(kinase activity);GO:0016310(phosphorylation);GO:0016740(transferase activity);GO:0035556(int…	00561(Glycerolipid metabolism);00564(Glycerophospholipid metabolism);04070(Phosphatidylinositol signaling system)	K00901	EC:2.7.1.107
0	ENSDARG00000019160	sh3bp5la	1.76116	1.45463	0.275878	0.0001216	1	SH3-binding domain protein 5-like, a [Source:ZFIN;Acc:ZDB-GENE-040426-2187]	GO:0004860(protein kinase inhibitor activity);GO:0005737(cytoplasm);GO:0035556(intracellular signal transduction);GO:0061099(negative regulation of protein tyrosine kinase activity)	NA	NA	NA
0	ENSDARG00000018404	krt18a.1	3.23292	2.69101	0.264691	0.000128489	1	keratin 18a, tandem duplicate 1 [Source:ZFIN;Acc:ZDB-GENE-030411-6]	GO:0005198(structural molecule activity);GO:0005882(intermediate filament)	NA	K07604	NA
0	ENSDARG00000097533	BX571880.1	2.52341	1.97769	0.351555	0.000130659	1	NA	NA	NA	NA	NA
0	ENSDARG00000102899	cremb	2.2692	1.76895	0.35929	0.000140102	1	cAMP responsive element modulator b [Source:ZFIN;Acc:ZDB-GENE-050417-150]	GO:0003677(DNA binding);GO:0003700(DNA-binding transcription factor activity);GO:0005634(nucleus);GO:0005667(transcription factor complex);GO:0006355(regulation of transcription, DNA-templated)	NA	NA	NA
0	ENSDARG00000029524	impdh1b	0.790035	0.630702	0.324958	0.000169437	1	IMP (inosine 5'-monophosphate) dehydrogenase 1b [Source:ZFIN;Acc:ZDB-GENE-030219-206]	GO:0000166(nucleotide binding);GO:0003824(catalytic activity);GO:0003938(IMP dehydrogenase activity);GO:0005634(nucleus);GO:0005737(cytoplasm);GO:0006164(purine nucleotide biosynthetic process);GO:0006177(GMP biosynthetic process);GO:0006183(GTP biosynthetic process);GO:0016491(oxidoreductase activity);GO:0046872(metal ion binding);GO:0055114(oxidation-reduction process)	00230(Purine metabolism);00983(Drug metabolism - other enzymes)	K00088	EC:1.1.1.205
0	ENSDARG00000045671	ifng1r	0.928917	0.678799	0.452564	0.000182301	1	interferon gamma related [Source:NCBI gene;Acc:553965]	GO:0005133(interferon-gamma receptor binding);GO:0005576(extracellular region);GO:0006955(immune response);GO:0042742(defense response to bacterium);GO:0050829(defense response to Gram-negative bacterium)	NA	NA	NA
0	ENSDARG00000012892	ammecr1	0.919625	0.763437	0.268537	0.000188445	1	Alport syndrome, mental retardation, midface hypoplasia and elliptocytosis chromosomal region gene 1 homolog (human) [Source:ZFIN;Acc:ZDB-GENE-040426-1533]	GO:0003674(molecular_function);GO:0005575(cellular_component);GO:0008150(biological_process)	NA	NA	NA
0	ENSDARG00000005191	ahcy	1.34068	1.08801	0.30127	0.00020599	1	adenosylhomocysteinase [Source:ZFIN;Acc:ZDB-GENE-031219-6]	GO:0004013(adenosylhomocysteinase activity);GO:0005829(cytosol);GO:0006730(one-carbon metabolic process);GO:0016787(hydrolase activity);GO:0019510(S-adenosylhomocysteine catabolic process);GO:0033353(S-adenosylmethionine cycle);GO:0051287(NAD binding)	00270(Cysteine and methionine metabolism)	K01251	EC:3.3.1.1
0	ENSDARG00000061547	hist1h4l.10	4.03511	3.19796	0.335454	0.000254963	1	histone 1, H4, like [Source:ZFIN;Acc:ZDB-GENE-070927-10]	GO:0000786(nucleosome);GO:0003677(DNA binding);GO:0005634(nucleus);GO:0005694(chromosome);GO:0006352(DNA-templated transcription, initiation);GO:0046982(protein heterodimerization activity)	NA	K11254	NA
0	ENSDARG00000101009	cited4b	0.869861	0.688223	0.337909	0.000282362	1	Cbp/p300-interacting transactivator, with Glu/Asp-rich carboxy-terminal domain, 4b [Source:ZFIN;Acc:ZDB-GENE-030425-5]	GO:0003713(transcription coactivator activity);GO:0005634(nucleus);GO:0006355(regulation of transcription, DNA-templated);GO:0006357(regulation of transcription by RNA polymerase II);GO:0042692(muscle cell differentiation);GO:1903508(positive regulation of nucleic acid-templated transcription)	NA	K22528	NA
0	ENSDARG00000116524	zgc:103700	1.03443	0.806734	0.358674	0.000282847	1	zgc:103700 [Source:ZFIN;Acc:ZDB-GENE-041010-13]	GO:0006955(immune response);GO:0016020(membrane);GO:0019882(antigen processing and presentation);GO:0042613(MHC class II protein complex)	NA	NA	NA
0	ENSDARG00000006314	itgav	0.951925	0.770315	0.305399	0.000289776	1	integrin, alpha V [Source:ZFIN;Acc:ZDB-GENE-060616-382]	GO:0001525(angiogenesis);GO:0001568(blood vessel development);GO:0001935(endothelial cell proliferation);GO:0005515(protein binding);GO:0007155(cell adhesion);GO:0007229(integrin-mediated signaling pathway);GO:0008305(integrin complex);GO:0016020(membrane);GO:0016021(integral component of membrane);GO:0016477(cell migration);GO:0042074(cell migration involved in gastrulation);GO:0070121(Kupffer's…	04145(Phagosome);04510(Focal adhesion);04512(ECM-receptor interaction);04514(Cell adhesion molecules (CAMs));04810(Regulation of actin cytoskeleton)	K06487	NA
0	ENSDARG00000063050	rc3h2	1.22429	0.975039	0.328418	0.000393731	1	ring finger and CCCH-type domains 2 [Source:ZFIN;Acc:ZDB-GENE-060503-694]	GO:0003729(mRNA binding);GO:0004842(ubiquitin-protein transferase activity);GO:0010608(posttranscriptional regulation of gene expression);GO:0016567(protein ubiquitination);GO:0046872(metal ion binding)	NA	K15690	NA
0	ENSDARG00000031683	fosab	3.62118	2.85202	0.344474	0.000439496	1	v-fos FBJ murine osteosarcoma viral oncogene homolog Ab [Source:ZFIN;Acc:ZDB-GENE-031222-4]	GO:0000978(RNA polymerase II proximal promoter sequence-specific DNA binding);GO:0003677(DNA binding);GO:0003690(double-stranded DNA binding);GO:0003700(DNA-binding transcription factor activity);GO:0005634(nucleus);GO:0005667(transcription factor complex);GO:0006355(regulation of transcription, DNA-templated);GO:0006357(regulation of transcription by RNA polymerase II);GO:0033555(multicellular o…	04010(MAPK signaling pathway);04210(Apoptosis);04620(Toll-like receptor signaling pathway);05132(Salmonella infection)	K04379	NA
0	ENSDARG00000079353	si:ch211-165d12.4	8.28591	5.9276	0.483212	0.000515574	1	si:ch211-165d12.4 [Source:ZFIN;Acc:ZDB-GENE-080303-7]	GO:0002250(adaptive immune response);GO:0016021(integral component of membrane);GO:0038023(signaling receptor activity)	00760(Nicotinate and nicotinamide metabolism)	K10524	2.7.1.173;EC:2.7.1.22
0	ENSDARG00000104279	appa	0.493034	0.411251	0.261669	0.00058404	1	amyloid beta (A4) precursor protein a [Source:ZFIN;Acc:ZDB-GENE-000616-13]	GO:0001944(vasculature development);GO:0004867(serine-type endopeptidase inhibitor activity);GO:0007399(nervous system development);GO:0007417(central nervous system development);GO:0008201(heparin binding);GO:0010951(negative regulation of endopeptidase activity);GO:0016020(membrane);GO:0016021(integral component of membrane);GO:0046914(transition metal ion binding);GO:0060026(convergent extensi…	NA	K04520	NA
0	ENSDARG00000077907	si:dkey-183p4.10	1.72394	1.36107	0.340971	0.000886361	1	si:dkey-183p4.10 [Source:ZFIN;Acc:ZDB-GENE-081104-337]	GO:0016020(membrane);GO:0016021(integral component of membrane)	NA	NA	NA
0	ENSDARG00000075211	chd7	1.67099	1.34573	0.31232	0.000979207	1	chromodomain helicase DNA binding protein 7 [Source:ZFIN;Acc:ZDB-GENE-070912-179]	GO:0001755(neural crest cell migration);GO:0001756(somitogenesis);GO:0001947(heart looping);GO:0002244(hematopoietic progenitor cell differentiation);GO:0005515(protein binding);GO:0005524(ATP binding);GO:0005634(nucleus);GO:0007368(determination of left/right symmetry);GO:0007507(heart development);GO:0009303(rRNA transcription);GO:0014029(neural crest formation);GO:0016817(hydrolase activity, a…	NA	K14437	EC:3.6.4.12
0	ENSDARG00000101828	si:dkey-16p6.1.17	1.86663	1.55721	0.261477	0.00112073	1	si:dkey-16p6.1 [Source:ZFIN;Acc:ZDB-GENE-081103-43]	GO:0000166(nucleotide binding);GO:0005515(protein binding);GO:0005524(ATP binding)	NA	NA	NA
0	ENSDARG00000092191	CR318588.1	38.6333	20.195	0.935848	0.00112386	1	uncharacterized LOC100535167 [Source:NCBI gene;Acc:100535167]	NA	NA	NA	NA
0	ENSDARG00000104353	nop58	2.18444	1.76128	0.310639	0.00117258	1	NOP58 ribonucleoprotein homolog (yeast) [Source:ZFIN;Acc:ZDB-GENE-040426-2140]	GO:0030515(snoRNA binding);GO:0031428(box C/D snoRNP complex);GO:0032040(small-subunit processome)	03008(Ribosome biogenesis in eukaryotes)	K14565	NA
0	ENSDARG00000069031	plac8l1	1.46914	1.21421	0.274951	0.00122289	1	PLAC8-like 1 [Source:ZFIN;Acc:ZDB-GENE-091204-165]	NA	NA	NA	NA
0	ENSDARG00000074902	nol4la	0.756247	0.6274	0.269473	0.00122383	1	nucleolar protein 4-like a [Source:ZFIN;Acc:ZDB-GENE-081105-118]	NA	NA	NA	NA
0	ENSDARG00000007737	zyg11	1.47026	1.20979	0.281316	0.00135783	1	zyg-11 homolog (C. elegans) [Source:ZFIN;Acc:ZDB-GENE-041014-17]	GO:0005515(protein binding);GO:0031462(Cul2-RING ubiquitin ligase complex)	NA	K10350	NA
0	ENSDARG00000009031	tnikb	1.12888	0.926929	0.284361	0.00173628	1	TRAF2 and NCK interacting kinase b [Source:ZFIN;Acc:ZDB-GENE-051113-320]	GO:0000165(MAPK cascade);GO:0004672(protein kinase activity);GO:0004674(protein serine/threonine kinase activity);GO:0005524(ATP binding);GO:0005737(cytoplasm);GO:0006468(protein phosphorylation);GO:0016301(kinase activity);GO:0016310(phosphorylation);GO:0023014(signal transduction by protein phosphorylation);GO:0031098(stress-activated protein kinase signaling cascade);GO:0032147(activation of p…	NA	NA	NA
0	ENSDARG00000009978	icn	9.32846	7.32085	0.349627	0.00188576	1	ictacalcin [Source:ZFIN;Acc:ZDB-GENE-030131-8599]	GO:0005509(calcium ion binding);GO:0046872(metal ion binding);GO:0046914(transition metal ion binding)	NA	NA	NA
0	ENSDARG00000073837	senp2	1.26073	1.04647	0.268725	0.00226278	1	SUMO specific peptidase 2 [Source:ZFIN;Acc:ZDB-GENE-060810-183]	GO:0005634(nucleus);GO:0006508(proteolysis);GO:0008234(cysteine-type peptidase activity);GO:0016926(protein desumoylation)	03013(RNA transport);04310(Wnt signaling pathway)	K03345	EC:3.4.22.68
0	ENSDARG00000036106	rgs18	0.948487	0.777917	0.286012	0.00334219	1	regulator of G protein signaling 18 [Source:ZFIN;Acc:ZDB-GENE-061013-722]	GO:0002574(thrombocyte differentiation);GO:0005096(GTPase activator activity);GO:0007186(G protein-coupled receptor signaling pathway);GO:0009948(anterior/posterior axis specification);GO:0043547(positive regulation of GTPase activity);GO:0048840(otolith development);GO:0048884(neuromast development);GO:0071599(otic vesicle development)	NA	K16449	NA
0	ENSDARG00000020645	slc7a3a	0.683557	0.560366	0.286693	0.00382334	1	solute carrier family 7 (cationic amino acid transporter, y+ system), member 3a [Source:ZFIN;Acc:ZDB-GENE-041114-206]	GO:0000064(L-ornithine transmembrane transporter activity);GO:0006631(fatty acid metabolic process);GO:0006641(triglyceride metabolic process);GO:0006865(amino acid transport);GO:0015181(arginine transmembrane transporter activity);GO:0015189(L-lysine transmembrane transporter activity);GO:0016020(membrane);GO:0016021(integral component of membrane);GO:0022857(transmembrane transporter activity);…	NA	K13865	NA
0	ENSDARG00000079175	si:ch211-79k12.1	4.1732	3.41797	0.288015	0.00497427	1	si:ch211-79k12.1 [Source:ZFIN;Acc:ZDB-GENE-080303-9]	GO:0016020(membrane);GO:0016021(integral component of membrane)	NA	NA	NA
0	ENSDARG00000053459	rybpb	0.923487	0.753947	0.292627	0.00579831	1	RING1 and YY1 binding protein b [Source:ZFIN;Acc:ZDB-GENE-061103-96]	GO:0045893(positive regulation of transcription, DNA-templated);GO:0046872(metal ion binding)	NA	K11469	NA
0	ENSDARG00000079434	tmem131l	1.34442	1.11918	0.26454	0.00615061	1	transmembrane 131 like [Source:ZFIN;Acc:ZDB-GENE-030131-6110]	NA	NA	NA	NA
0	ENSDARG00000018559	kdm7ab	0.8528	0.709816	0.264763	0.00633995	1	lysine (K)-specific demethylase 7Ab [Source:ZFIN;Acc:ZDB-GENE-050309-32]	GO:0005634(nucleus);GO:0046872(metal ion binding)	NA	K11445	EC:1.14.11.-
1	ENSDARG00000101040	ccl20a.3	354.654	8.53196	5.37739	2.11652e-277	5.16241e-273	chemokine (C-C motif) ligand 20a, duplicate 3 [Source:ZFIN;Acc:ZDB-GENE-081022-193]	GO:0002548(monocyte chemotaxis);GO:0005125(cytokine activity);GO:0005576(extracellular region);GO:0005615(extracellular space);GO:0006935(chemotaxis);GO:0006954(inflammatory response);GO:0006955(immune response);GO:0007186(G protein-coupled receptor signaling pathway);GO:0008009(chemokine activity);GO:0010469(regulation of signaling receptor activity);GO:0030593(neutrophil chemotaxis);GO:0043547(…	04060(Cytokine-cytokine receptor interaction)	K14625	NA
1	ENSDARG00000114393	CR407590.2	48.8481	1.38077	5.14475	5.09155e-204	1.24188e-199	NA	GO:0005576(extracellular region);GO:0006955(immune response);GO:0008009(chemokine activity);GO:0060326(cell chemotaxis)	NA	NA	NA
1	ENSDARG00000092714	si:ch211-266a5.12	23.4099	2.20488	3.40835	1.10531e-185	2.69596e-181	si:ch211-266a5.12 [Source:ZFIN;Acc:ZDB-GENE-081104-210]	NA	NA	NA	NA
1	ENSDARG00000112125	FP236331.1	78.2057	13.9262	2.48947	4.29265e-169	1.04702e-164	C-C motif chemokine 20-like [Source:NCBI gene;Acc:101884175]	GO:0005576(extracellular region);GO:0006955(immune response);GO:0008009(chemokine activity);GO:0060326(cell chemotaxis)	NA	NA	NA
1	ENSDARG00000028333	nitr9	2.85766	0.757563	1.9154	2.06317e-104	5.03229e-100	novel immune-type receptor 9 [Source:ZFIN;Acc:ZDB-GENE-041001-6]	GO:0005515(protein binding);GO:0009617(response to bacterium);GO:0014065(phosphatidylinositol 3-kinase signaling);GO:0016020(membrane);GO:0016021(integral component of membrane)	NA	NA	NA
1	ENSDARG00000094965	nfil3-5	12.6258	2.24478	2.49173	1.19284e-95	2.90945e-91	nuclear factor, interleukin 3 regulated, member 5 [Source:ZFIN;Acc:ZDB-GENE-030131-7677]	GO:0003700(DNA-binding transcription factor activity);GO:0005634(nucleus);GO:0006355(regulation of transcription, DNA-templated);GO:0007623(circadian rhythm);GO:0032922(circadian regulation of gene expression)	NA	NA	NA
1	ENSDARG00000009511	tnfa	7.32561	1.32537	2.46655	2.3998e-83	5.85336e-79	tumor necrosis factor a (TNF superfamily, member 2) [Source:ZFIN;Acc:ZDB-GENE-050317-1]	GO:0001889(liver development);GO:0002237(response to molecule of bacterial origin);GO:0005125(cytokine activity);GO:0005164(tumor necrosis factor receptor binding);GO:0005515(protein binding);GO:0005615(extracellular space);GO:0006914(autophagy);GO:0006954(inflammatory response);GO:0006955(immune response);GO:0009615(response to virus);GO:0009617(response to bacterium);GO:0010469(regulation of si…	04010(MAPK signaling pathway);04060(Cytokine-cytokine receptor interaction);04150(mTOR signaling pathway);04210(Apoptosis);04217(Necroptosis);04350(TGF-beta signaling pathway);04620(Toll-like receptor signaling pathway);04621(NOD-like receptor signaling pathway);04622(RIG-I-like receptor signaling pathway);04625(C-type lectin receptor signaling pathway);04920(Adipocytokine signaling pathway);0493…	K03156	NA
1	ENSDARG00000102555	si:dkey-33i11.9	20.155	9.41903	1.09749	6.37267e-59	1.55436e-54	si:dkey-33i11.9 [Source:ZFIN;Acc:ZDB-GENE-060503-262]	GO:0016020(membrane);GO:0016021(integral component of membrane)	NA	NA	NA
1	ENSDARG00000098024	si:dkey-262k9.2	15.0097	6.66102	1.17208	4.13485e-53	1.00853e-48	si:dkey-262k9.2 [Source:ZFIN;Acc:ZDB-GENE-131121-282]	GO:0016020(membrane);GO:0016021(integral component of membrane)	NA	NA	NA
1	ENSDARG00000045673	il22	1.76803	0.66996	1.39999	1.77193e-49	4.32192e-45	interleukin 22 [Source:NCBI gene;Acc:553964]	GO:0006955(immune response);GO:0050727(regulation of inflammatory response);GO:0050829(defense response to Gram-negative bacterium)	04060(Cytokine-cytokine receptor interaction)	K05445	NA
1	ENSDARG00000076520	mafb	2.05302	0.843142	1.2839	2.05206e-46	5.00518e-42	v-maf avian musculoaponeurotic fibrosarcoma oncogene homolog b (paralog b) [Source:ZFIN;Acc:ZDB-GENE-141211-38]	GO:0003677(DNA binding);GO:0003700(DNA-binding transcription factor activity);GO:0005634(nucleus);GO:0006355(regulation of transcription, DNA-templated)	NA	NA	NA
1	ENSDARG00000075288	nitr4a	2.15738	0.985737	1.13001	3.54374e-45	8.64353e-41	novel immune-type receptor 4a [Source:ZFIN;Acc:ZDB-GENE-001106-11]	GO:0016020(membrane);GO:0016021(integral component of membrane)	NA	NA	NA
1	ENSDARG00000088040	si:dkeyp-27c8.2	7.50331	3.44308	1.12383	1.63816e-42	3.99563e-38	si:dkeyp-27c8.2 [Source:ZFIN;Acc:ZDB-GENE-090311-51]	GO:0016311(dephosphorylation);GO:0016791(phosphatase activity)	NA	K17619	3.1.3.-;EC:3.1.3.48
1	ENSDARG00000058244	il17ra1a	2.59522	1.15034	1.1738	1.7339e-39	4.22916e-35	interleukin 17 receptor A1a [Source:ZFIN;Acc:ZDB-GENE-070705-242]	GO:0016020(membrane);GO:0016021(integral component of membrane);GO:0019221(cytokine-mediated signaling pathway);GO:0030368(interleukin-17 receptor activity)	04060(Cytokine-cytokine receptor interaction)	K05164	NA
1	ENSDARG00000011941	bmpr2a	4.1363	1.74775	1.24284	1.29594e-37	3.16094e-33	bone morphogenetic protein receptor, type II a (serine/threonine kinase) [Source:ZFIN;Acc:ZDB-GENE-070618-1]	GO:0000166(nucleotide binding);GO:0001944(vasculature development);GO:0001945(lymph vessel development);GO:0001947(heart looping);GO:0002040(sprouting angiogenesis);GO:0003146(heart jogging);GO:0004672(protein kinase activity);GO:0004674(protein serine/threonine kinase activity);GO:0004675(transmembrane receptor protein serine/threonine kinase activity);GO:0005024(transforming growth factor beta-…	04060(Cytokine-cytokine receptor interaction);04350(TGF-beta signaling pathway)	K04671	EC:2.7.11.30
1	ENSDARG00000074782	adgrg3	2.58281	1.16139	1.15309	2.2031e-34	5.37358e-30	adhesion G protein-coupled receptor G3 [Source:ZFIN;Acc:ZDB-GENE-140106-110]	GO:0004888(transmembrane signaling receptor activity);GO:0004930(G protein-coupled receptor activity);GO:0005887(integral component of plasma membrane);GO:0007166(cell surface receptor signaling pathway);GO:0007186(G protein-coupled receptor signaling pathway);GO:0007189(adenylate cyclase-activating G protein-coupled receptor signaling pathway);GO:0016020(membrane);GO:0016021(integral component o…	NA	K08452	NA
1	ENSDARG00000004060	bhlhe40	29.1279	15.2781	0.930936	5.75252e-33	1.4031e-28	basic helix-loop-helix family, member e40 [Source:ZFIN;Acc:ZDB-GENE-030131-3133]	GO:0000977(RNA polymerase II regulatory region sequence-specific DNA binding);GO:0001756(somitogenesis);GO:0003677(DNA binding);GO:0003714(transcription corepressor activity);GO:0005634(nucleus);GO:0006355(regulation of transcription, DNA-templated);GO:0007219(Notch signaling pathway);GO:0008134(transcription factor binding);GO:0030154(cell differentiation);GO:0032922(circadian regulation of gene…	NA	K03729	NA
1	ENSDARG00000095556	CR318588.4	104.076	72.4851	0.52188	7.16107e-33	1.74666e-28	uncharacterized LOC795545 [Source:NCBI gene;Acc:795545]	NA	NA	NA	NA
1	ENSDARG00000101668	BX681417.2	2.04295	0.870873	1.23012	1.00876e-31	2.46047e-27	NA	NA	NA	NA	NA
1	ENSDARG00000097639	si:ch73-265h17.4	2.29558	1.15395	0.992276	3.59536e-30	8.76944e-26	si:ch73-265h17.4 [Source:ZFIN;Acc:ZDB-GENE-131121-594]	NA	NA	NA	NA
1	ENSDARG00000087195	rorc	1.01228	0.556192	0.863947	8.87411e-28	2.16448e-23	RAR-related orphan receptor C [Source:ZFIN;Acc:ZDB-GENE-110411-42]	GO:0003677(DNA binding);GO:0003700(DNA-binding transcription factor activity);GO:0003707(steroid hormone receptor activity);GO:0004879(nuclear receptor activity);GO:0005634(nucleus);GO:0006355(regulation of transcription, DNA-templated);GO:0008270(zinc ion binding);GO:0030522(intracellular receptor signaling pathway);GO:0043401(steroid hormone mediated signaling pathway);GO:0043565(sequence-speci…	NA	NA	NA
1	ENSDARG00000094578	epsti1	2.56521	1.21115	1.0827	2.77238e-26	6.7621e-22	epithelial stromal interaction 1 [Source:ZFIN;Acc:ZDB-GENE-081104-172]	GO:0005515(protein binding)	NA	NA	NA
1	ENSDARG00000012499	per1b	5.37854	2.56101	1.0705	7.2854e-26	1.77698e-21	period circadian clock 1b [Source:ZFIN;Acc:ZDB-GENE-040419-1]	GO:0000122(negative regulation of transcription by RNA polymerase II);GO:0000976(transcription regulatory region sequence-specific DNA binding);GO:0001222(transcription corepressor binding);GO:0005515(protein binding);GO:0005634(nucleus);GO:0005737(cytoplasm);GO:0007601(visual perception);GO:0008134(transcription factor binding);GO:0009266(response to temperature stimulus);GO:0009416(response to …	NA	K21944	NA
1	ENSDARG00000099332	ly6m5	1.20461	0.598131	1.01003	5.54463e-24	1.35239e-19	lymphocyte antigen 6 family member M5 [Source:ZFIN;Acc:ZDB-GENE-131127-265]	NA	NA	NA	NA
1	ENSDARG00000090396	si:cabz01074946.1	5.79237	2.59483	1.15851	7.5619e-24	1.84442e-19	si:cabz01074946.1 [Source:ZFIN;Acc:ZDB-GENE-160113-134]	GO:0016020(membrane);GO:0016021(integral component of membrane)	NA	K06511	NA
1	ENSDARG00000079075	si:ch211-71m22.3	1.42942	0.971204	0.557579	1.27553e-23	3.11116e-19	si:ch211-71m22.3 [Source:ZFIN;Acc:ZDB-GENE-070705-195]	GO:0017121(plasma membrane phospholipid scrambling);GO:0017128(phospholipid scramblase activity)	NA	NA	NA
1	ENSDARG00000036820	mgll	0.625853	0.394727	0.664969	3.72682e-23	9.09009e-19	monoglyceride lipase [Source:ZFIN;Acc:ZDB-GENE-031006-9]	GO:0016020(membrane);GO:0047372(acylglycerol lipase activity)	00561(Glycerolipid metabolism)	K01054	EC:3.1.1.23
1	ENSDARG00000100887	si:dkey-11f4.20	3.29977	2.07622	0.668404	5.84493e-22	1.42564e-17	si:dkey-11f4.20 [Source:ZFIN;Acc:ZDB-GENE-070912-359]	GO:0016020(membrane);GO:0016021(integral component of membrane)	04514(Cell adhesion molecules (CAMs))	K06449	NA
1	ENSDARG00000100387	si:dkey-78o7.3	6.93155	3.12679	1.14849	9.81822e-22	2.39476e-17	si:dkey-78o7.3 [Source:ZFIN;Acc:ZDB-GENE-120709-79]	NA	NA	NA	NA
1	ENSDARG00000090844	CABZ01054965.1	2.24601	1.20814	0.894581	1.24879e-21	3.04592e-17	interleukin-1 receptor type 1-like [Source:NCBI gene;Acc:799279]	GO:0005515(protein binding);GO:0007165(signal transduction)	NA	NA	NA
1	ENSDARG00000077557	nitr5	1.3192	1.10015	0.261968	1.50155e-21	3.66242e-17	novel immune-type receptor 5 [Source:ZFIN;Acc:ZDB-GENE-020225-40]	GO:0016020(membrane);GO:0016021(integral component of membrane)	NA	NA	NA
1	ENSDARG00000052158	il23r	0.588721	0.387424	0.60367	2.01464e-21	4.91391e-17	interleukin 23 receptor [Source:ZFIN;Acc:ZDB-GENE-080107-5]	GO:0004896(cytokine receptor activity);GO:0004921(interleukin-11 receptor activity);GO:0005515(protein binding);GO:0008284(positive regulation of cell population proliferation);GO:0009897(external side of plasma membrane);GO:0016020(membrane);GO:0016021(integral component of membrane);GO:0019221(cytokine-mediated signaling pathway);GO:0019955(cytokine binding);GO:0019970(interleukin-11 binding);G…	NA	NA	NA
1	ENSDARG00000092191	CR318588.1	38.6457	23.9849	0.688183	6.06354e-21	1.47896e-16	uncharacterized LOC100535167 [Source:NCBI gene;Acc:100535167]	NA	NA	NA	NA
1	ENSDARG00000098635	irf2bp2b	2.63816	1.42633	0.887228	1.0116e-20	2.46739e-16	interferon regulatory factor 2 binding protein 2b [Source:ZFIN;Acc:ZDB-GENE-040426-2574]	NA	NA	K22383	NA
1	ENSDARG00000117263	CABZ01056054.1	1.22211	0.698479	0.807084	1.85016e-20	4.51274e-16	NA	NA	NA	NA	NA
1	ENSDARG00000036785	si:ch211-226m16.2	6.86531	4.23787	0.695985	5.00952e-20	1.22187e-15	si:ch211-226m16.2 [Source:ZFIN;Acc:ZDB-GENE-030131-2302]	GO:0004568(chitinase activity);GO:0005576(extracellular region);GO:0005615(extracellular space);GO:0005737(cytoplasm);GO:0005975(carbohydrate metabolic process);GO:0006032(chitin catabolic process);GO:0008061(chitin binding);GO:0045766(positive regulation of angiogenesis)	NA	NA	NA
1	ENSDARG00000055955	lcp2a	5.50631	3.45184	0.67372	2.13533e-19	5.20829e-15	lymphocyte cytosolic protein 2a [Source:ZFIN;Acc:ZDB-GENE-041114-97]	GO:0005515(protein binding);GO:0007169(transmembrane receptor protein tyrosine kinase signaling pathway);GO:0035556(intracellular signal transduction)	NA	NA	NA
1	ENSDARG00000076846	nitr6a	1.36186	0.85129	0.677861	1.00281e-18	2.44595e-14	novel immune-type receptor 6a [Source:ZFIN;Acc:ZDB-GENE-020225-42]	GO:0016020(membrane);GO:0016021(integral component of membrane)	NA	NA	NA
1	ENSDARG00000073726	zbtb32	3.06819	1.52559	1.00802	1.37095e-18	3.34387e-14	zinc finger and BTB domain containing 32 [Source:ZFIN;Acc:ZDB-GENE-131121-166]	GO:0003676(nucleic acid binding);GO:0005634(nucleus)	NA	NA	NA
1	ENSDARG00000101199	rbp4	2.51536	0.747277	1.75105	1.72266e-18	4.20175e-14	retinol binding protein 4, plasma [Source:ZFIN;Acc:ZDB-GENE-000210-19]	GO:0001889(liver development);GO:0005501(retinoid binding);GO:0032526(response to retinoic acid);GO:0034632(retinol transmembrane transporter activity);GO:0034633(retinol transport)	NA	K18271	NA
1	ENSDARG00000053457	rpl23	67.8645	56.0224	0.276652	4.76368e-18	1.16191e-13	ribosomal protein L23 [Source:ZFIN;Acc:ZDB-GENE-030131-8756]	GO:0003735(structural constituent of ribosome);GO:0005840(ribosome);GO:0006412(translation);GO:0022625(cytosolic large ribosomal subunit);GO:0070180(large ribosomal subunit rRNA binding)	03010(Ribosome)	K02894	NA
1	ENSDARG00000117482	CR847936.10	1.45028	0.833153	0.799679	6.63648e-18	1.6187e-13	NA	NA	NA	NA	NA
1	ENSDARG00000102776	cxcl19	3.79891	2.08196	0.86764	8.26449e-18	2.01579e-13	chemokine (C-X-C motif) ligand 19 [Source:ZFIN;Acc:ZDB-GENE-140708-2]	GO:0005576(extracellular region);GO:0005615(extracellular space);GO:0006935(chemotaxis);GO:0006952(defense response);GO:0006954(inflammatory response);GO:0006955(immune response);GO:0008009(chemokine activity);GO:0030593(neutrophil chemotaxis);GO:0030595(leukocyte chemotaxis);GO:0061844(antimicrobial humoral immune response mediated by antimicrobial peptide);GO:0070098(chemokine-mediated signalin…	NA	NA	NA
1	ENSDARG00000043933	il17a/f1	0.652696	0.398023	0.713559	1.08137e-17	2.63758e-13	interleukin 17a/f1 [Source:NCBI gene;Acc:553959]	GO:0005125(cytokine activity);GO:0005576(extracellular region);GO:0006954(inflammatory response);GO:0010469(regulation of signaling receptor activity)	04060(Cytokine-cytokine receptor interaction)	K05494	NA
1	ENSDARG00000015657	zgc:77112	2.48168	1.2672	0.969668	1.65139e-17	4.0279e-13	zgc:77112 [Source:ZFIN;Acc:ZDB-GENE-040426-2219]	GO:0000164(protein phosphatase type 1 complex);GO:0001878(response to yeast);GO:0005515(protein binding);GO:0005975(carbohydrate metabolic process);GO:0005977(glycogen metabolic process);GO:0005981(regulation of glycogen catabolic process);GO:0019888(protein phosphatase regulator activity);GO:0043666(regulation of phosphoprotein phosphatase activity)	04910(Insulin signaling pathway)	K07189	NA
1	ENSDARG00000033160	nr1d1	1.04264	0.622859	0.743263	2.92218e-17	7.12749e-13	nuclear receptor subfamily 1, group d, member 1 [Source:ZFIN;Acc:ZDB-GENE-050105-1]	GO:0000122(negative regulation of transcription by RNA polymerase II);GO:0000785(chromatin);GO:0000976(transcription regulatory region sequence-specific DNA binding);GO:0000977(RNA polymerase II regulatory region sequence-specific DNA binding);GO:0000981(DNA-binding transcription factor activity, RNA polymerase II-specific);GO:0001227(DNA-binding transcription repressor activity, RNA polymerase I…	NA	K03728	NA
1	ENSDARG00000036629	rps14	57.8493	47.8026	0.275211	4.87676e-16	1.18949e-11	ribosomal protein S14 [Source:ZFIN;Acc:ZDB-GENE-030131-8631]	GO:0000028(ribosomal small subunit assembly);GO:0000462(maturation of SSU-rRNA from tricistronic rRNA transcript (SSU-rRNA, 5.8S rRNA, LSU-rRNA));GO:0003735(structural constituent of ribosome);GO:0005840(ribosome);GO:0006412(translation);GO:0022627(cytosolic small ribosomal subunit);GO:0043009(chordate embryonic development);GO:0043249(erythrocyte maturation);GO:0048027(mRNA 5'-UTR binding);GO:00…	03010(Ribosome)	K02955	NA
1	ENSDARG00000045305	pde7a	3.38698	2.12203	0.674555	5.12868e-16	1.25094e-11	phosphodiesterase 7A [Source:ZFIN;Acc:ZDB-GENE-031222-10]	GO:0004114(3',5'-cyclic-nucleotide phosphodiesterase activity);GO:0004115(3',5'-cyclic-AMP phosphodiesterase activity);GO:0007165(signal transduction);GO:0008081(phosphoric diester hydrolase activity);GO:0016787(hydrolase activity);GO:0046872(metal ion binding)	00230(Purine metabolism)	K18436	EC:3.1.4.53
1	ENSDARG00000093748	si:ch211-217k17.11	2.01493	1.12905	0.835622	5.6448e-16	1.37682e-11	si:ch211-217k17.11 [Source:ZFIN;Acc:ZDB-GENE-030131-8636]	NA	NA	NA	NA
1	ENSDARG00000099148	bzw1b	19.8044	14.3933	0.46043	6.03358e-16	1.47165e-11	basic leucine zipper and W2 domains 1b [Source:ZFIN;Acc:ZDB-GENE-040426-2881]	GO:0005515(protein binding)	NA	NA	NA
1	ENSDARG00000029063	clpxa	0.888858	0.565217	0.65315	1.22651e-15	2.99158e-11	caseinolytic mitochondrial matrix peptidase chaperone subunit a [Source:ZFIN;Acc:ZDB-GENE-040912-143]	GO:0004176(ATP-dependent peptidase activity);GO:0005524(ATP binding);GO:0005759(mitochondrial matrix);GO:0006457(protein folding);GO:0006508(proteolysis);GO:0030163(protein catabolic process);GO:0048821(erythrocyte development);GO:0051082(unfolded protein binding)	NA	K03544	NA
1	ENSDARG00000109301	nitr6b.2	1.99393	1.32342	0.591345	1.14179e-14	2.78495e-10	novel immune-type receptor 6b [Source:ZFIN;Acc:ZDB-GENE-041001-10]	GO:0016020(membrane);GO:0016021(integral component of membrane)	NA	NA	NA
1	ENSDARG00000069482	traf1	13.0071	8.55637	0.604224	1.21874e-14	2.97262e-10	TNF receptor-associated factor 1 [Source:ZFIN;Acc:ZDB-GENE-071120-4]	GO:0005164(tumor necrosis factor receptor binding);GO:0005515(protein binding);GO:0007165(signal transduction);GO:0008270(zinc ion binding);GO:0031625(ubiquitin protein ligase binding);GO:0031996(thioesterase binding);GO:0032991(protein-containing complex);GO:0042981(regulation of apoptotic process);GO:0046872(metal ion binding)	04210(Apoptosis)	K03172	NA
1	ENSDARG00000058939	b4galnt3b	0.549664	0.37443	0.553856	1.36036e-14	3.31806e-10	beta-1,4-N-acetyl-galactosaminyl transferase 3b [Source:ZFIN;Acc:ZDB-GENE-030131-8615]	GO:0005794(Golgi apparatus);GO:0008376(acetylgalactosaminyltransferase activity);GO:0016740(transferase activity);GO:0032580(Golgi cisterna membrane);GO:0033842(N-acetyl-beta-glucosaminyl-glycoprotein 4-beta-N-acetylgalactosaminyltransferase activity)	NA	K09656	EC:2.4.1.244
1	ENSDARG00000032990	plxnb3	0.427698	0.325924	0.392058	1.85852e-14	4.53312e-10	plexin B3 [Source:ZFIN;Acc:ZDB-GENE-081104-53]	GO:0002116(semaphorin receptor complex);GO:0005515(protein binding);GO:0005887(integral component of plasma membrane);GO:0007162(negative regulation of cell adhesion);GO:0007165(signal transduction);GO:0008360(regulation of cell shape);GO:0016020(membrane);GO:0016021(integral component of membrane);GO:0017154(semaphorin receptor activity);GO:0030334(regulation of cell migration);GO:0043087(regula…	NA	NA	NA
1	ENSDARG00000044619	birc2	5.47897	3.49147	0.650072	2.04169e-14	4.9799e-10	baculoviral IAP repeat containing 2 [Source:ZFIN;Acc:ZDB-GENE-030825-6]	GO:0005634(nucleus);GO:0005737(cytoplasm);GO:0006915(apoptotic process);GO:0016567(protein ubiquitination);GO:0042981(regulation of apoptotic process);GO:0043027(cysteine-type endopeptidase inhibitor activity involved in apoptotic process);GO:0061630(ubiquitin protein ligase activity);GO:1990001(inhibition of cysteine-type endopeptidase activity involved in apoptotic process)	04120(Ubiquitin mediated proteolysis);04210(Apoptosis);04217(Necroptosis);04510(Focal adhesion);04621(NOD-like receptor signaling pathway);05168(Herpes simplex virus 1 infection)	K16060	NA
1	ENSDARG00000015653	tnip1	16.6207	10.3688	0.680733	2.21379e-14	5.39965e-10	TNFAIP3 interacting protein 1 [Source:ZFIN;Acc:ZDB-GENE-070112-1502]	GO:0002755(MyD88-dependent toll-like receptor signaling pathway);GO:0043124(negative regulation of I-kappaB kinase/NF-kappaB signaling);GO:0050727(regulation of inflammatory response);GO:0070373(negative regulation of ERK1 and ERK2 cascade)	NA	NA	NA
1	ENSDARG00000044142	acss1	1.41096	0.862834	0.709527	3.89178e-14	9.49243e-10	acyl-CoA synthetase short chain family member 1 [Source:ZFIN;Acc:ZDB-GENE-050320-139]	GO:0000166(nucleotide binding);GO:0003824(catalytic activity);GO:0003987(acetate-CoA ligase activity);GO:0005524(ATP binding);GO:0005575(cellular_component);GO:0016208(AMP binding);GO:0016874(ligase activity);GO:0019427(acetyl-CoA biosynthetic process from acetate)	00010(Glycolysis / Gluconeogenesis);00620(Pyruvate metabolism);00630(Glyoxylate and dicarboxylate metabolism);00640(Propanoate metabolism)	K01895	EC:6.2.1.1
1	ENSDARG00000068141	tnfsf11	0.352596	0.265517	0.409215	4.08541e-14	9.96473e-10	TNF superfamily member 11 [Source:ZFIN;Acc:ZDB-GENE-090805-2]	GO:0005164(tumor necrosis factor receptor binding);GO:0005515(protein binding);GO:0006955(immune response);GO:0009612(response to mechanical stimulus);GO:0016020(membrane);GO:0016021(integral component of membrane)	NA	NA	NA
1	ENSDARG00000089868	si:ch211-112c15.8	1.5584	0.969882	0.684186	4.28335e-14	1.04475e-09	si:ch211-112c15.8 [Source:ZFIN;Acc:ZDB-GENE-141211-78]	GO:0005031(tumor necrosis factor-activated receptor activity);GO:0005515(protein binding);GO:0005739(mitochondrion);GO:0006954(inflammatory response);GO:0007165(signal transduction);GO:0016020(membrane);GO:0016021(integral component of membrane);GO:0033209(tumor necrosis factor-mediated signaling pathway);GO:0043120(tumor necrosis factor binding);GO:0043235(receptor complex);GO:0045121(membrane r…	NA	NA	NA
1	ENSDARG00000012627	cdc34b	1.09691	0.718678	0.610032	4.95354e-14	1.20822e-09	cell division cycle 34 homolog (S. cerevisiae) b [Source:ZFIN;Acc:ZDB-GENE-040718-439]	GO:0000166(nucleotide binding);GO:0000209(protein polyubiquitination);GO:0005524(ATP binding);GO:0006511(ubiquitin-dependent protein catabolic process);GO:0016740(transferase activity);GO:0043161(proteasome-mediated ubiquitin-dependent protein catabolic process);GO:0061631(ubiquitin conjugating enzyme activity)	NA	NA	NA
1	ENSDARG00000104882	FP085399.5	5.10721	3.26132	0.647081	9.34811e-14	2.2801e-09	NA	NA	NA	NA	NA
1	ENSDARG00000111653	CABZ01081490.1	1.44377	0.943166	0.614259	1.11455e-13	2.71851e-09	NA	GO:0005125(cytokine activity);GO:0005126(cytokine receptor binding);GO:0005576(extracellular region);GO:0005615(extracellular space);GO:0006955(immune response);GO:0010469(regulation of signaling receptor activity)	NA	NA	NA
1	ENSDARG00000096655	BX901920.1	22.5636	15.3692	0.553953	1.9613e-13	4.78381e-09	NA	NA	NA	NA	NA
1	ENSDARG00000104775	ly6m2	0.424852	0.306629	0.470464	1.99179e-13	4.85816e-09	lymphocyte antigen 6 family member M2 [Source:ZFIN;Acc:ZDB-GENE-131121-523]	NA	NA	K03985	NA
1	ENSDARG00000023472	ctnnb2	4.92507	3.25671	0.596729	3.50728e-13	8.5546e-09	catenin, beta 2 [Source:ZFIN;Acc:ZDB-GENE-040426-2575]	GO:0003713(transcription coactivator activity);GO:0005515(protein binding);GO:0005634(nucleus);GO:0005913(cell-cell adherens junction);GO:0007155(cell adhesion);GO:0009950(dorsal/ventral axis specification);GO:0009953(dorsal/ventral pattern formation);GO:0016342(catenin complex);GO:0019903(protein phosphatase binding);GO:0035257(nuclear hormone receptor binding);GO:0045294(alpha-catenin binding);…	NA	NA	NA
1	ENSDARG00000002663	optn	5.5261	3.74054	0.563016	4.9981e-13	1.21909e-08	optineurin [Source:ZFIN;Acc:ZDB-GENE-030131-8103]	GO:0005794(Golgi apparatus);GO:0006914(autophagy);GO:0016192(vesicle-mediated transport);GO:0031410(cytoplasmic vesicle);GO:0070530(K63-linked polyubiquitin modification-dependent protein binding)	04137(Mitophagy - animal)	K19946	NA
1	ENSDARG00000078567	lonrf1l	4.05249	2.47315	0.712456	1.41788e-12	3.45836e-08	LON peptidase N-terminal domain and ring finger 1, like [Source:ZFIN;Acc:ZDB-GENE-081104-397]	GO:0005515(protein binding);GO:0046872(metal ion binding)	NA	NA	NA
1	ENSDARG00000075720	il2rb	2.0353	1.25929	0.692625	2.46682e-12	6.01681e-08	interleukin 2 receptor, beta [Source:ZFIN;Acc:ZDB-GENE-080108-2]	GO:0004896(cytokine receptor activity);GO:0005515(protein binding);GO:0016020(membrane);GO:0016021(integral component of membrane);GO:0019221(cytokine-mediated signaling pathway)	04060(Cytokine-cytokine receptor interaction);04144(Endocytosis)	K05069	NA
1	ENSDARG00000091734	traf3ip2l	1.18077	0.78579	0.587514	6.67906e-12	1.62909e-07	TRAF3 interacting protein 2-like [Source:ZFIN;Acc:ZDB-GENE-110919-1]	GO:0006959(humoral immune response);GO:0043123(positive regulation of I-kappaB kinase/NF-kappaB signaling)	NA	NA	NA
1	ENSDARG00000019396	rergla	1.77712	1.16572	0.608315	1.82775e-11	4.45807e-07	RERG/RAS-like a [Source:ZFIN;Acc:ZDB-GENE-040718-198]	GO:0003924(GTPase activity);GO:0005525(GTP binding);GO:0007165(signal transduction);GO:0016020(membrane)	NA	K17198	NA
1	ENSDARG00000032868	pde4ba	9.67938	6.94282	0.479393	2.45215e-11	5.98103e-07	phosphodiesterase 4B, cAMP-specific a [Source:ZFIN;Acc:ZDB-GENE-030131-9570]	GO:0004114(3',5'-cyclic-nucleotide phosphodiesterase activity);GO:0004115(3',5'-cyclic-AMP phosphodiesterase activity);GO:0005515(protein binding);GO:0005829(cytosol);GO:0007165(signal transduction);GO:0008081(phosphoric diester hydrolase activity);GO:0016787(hydrolase activity);GO:0030552(cAMP binding);GO:0044325(ion channel binding);GO:0046872(metal ion binding)	00230(Purine metabolism)	K13293	EC:3.1.4.53
1	ENSDARG00000075282	irs2b	0.751928	0.498261	0.593692	4.0991e-11	9.9981e-07	insulin receptor substrate 2b [Source:ZFIN;Acc:ZDB-GENE-081104-462]	GO:0005158(insulin receptor binding);GO:0005829(cytosol);GO:0005886(plasma membrane);GO:0008286(insulin receptor signaling pathway);GO:0043548(phosphatidylinositol 3-kinase binding)	04068(FoxO signaling pathway);04140(Autophagy - animal);04910(Insulin signaling pathway);04920(Adipocytokine signaling pathway)	K07187	NA
1	ENSDARG00000035990	cited4a	0.749749	0.529265	0.502419	8.31493e-11	2.02809e-06	Cbp/p300-interacting transactivator, with Glu/Asp-rich carboxy-terminal domain, 4a [Source:ZFIN;Acc:ZDB-GENE-030131-7661]	GO:0003713(transcription coactivator activity);GO:0005634(nucleus);GO:0006355(regulation of transcription, DNA-templated);GO:0006357(regulation of transcription by RNA polymerase II);GO:1903508(positive regulation of nucleic acid-templated transcription)	NA	K22528	NA
1	ENSDARG00000062080	shc2	0.578566	0.423113	0.451436	3.42823e-10	8.3618e-06	SHC (Src homology 2 domain containing) transforming protein 2 [Source:ZFIN;Acc:ZDB-GENE-050208-666]	GO:0000187(activation of MAPK activity);GO:0005515(protein binding);GO:0005886(plasma membrane);GO:0030971(receptor tyrosine kinase binding);GO:0035556(intracellular signal transduction)	04012(ErbB signaling pathway);04370(VEGF signaling pathway);04510(Focal adhesion);04910(Insulin signaling pathway)	K17447	NA
1	ENSDARG00000009594	nr1d2b	2.03696	1.39068	0.55063	6.52526e-10	1.59158e-05	nuclear receptor subfamily 1, group D, member 2b [Source:ZFIN;Acc:ZDB-GENE-990415-244]	GO:0000122(negative regulation of transcription by RNA polymerase II);GO:0000976(transcription regulatory region sequence-specific DNA binding);GO:0000977(RNA polymerase II regulatory region sequence-specific DNA binding);GO:0000981(DNA-binding transcription factor activity, RNA polymerase II-specific);GO:0003677(DNA binding);GO:0003700(DNA-binding transcription factor activity);GO:0003707(steroi…	NA	K08531	NA
1	ENSDARG00000101289	slc29a1a	0.685316	0.494091	0.471994	7.17864e-10	1.75094e-05	solute carrier family 29 (equilibrative nucleoside transporter), member 1a [Source:ZFIN;Acc:ZDB-GENE-050913-138]	GO:0005337(nucleoside transmembrane transporter activity);GO:0005886(plasma membrane);GO:0015862(uridine transport);GO:0016020(membrane);GO:0016021(integral component of membrane);GO:1901642(nucleoside transmembrane transport)	NA	K15014	NA
1	ENSDARG00000040700	nab1b	0.701527	0.527493	0.411347	1.18987e-09	2.90221e-05	NGFI-A binding protein 1b (EGR1 binding protein 1) [Source:ZFIN;Acc:ZDB-GENE-081105-85]	GO:0005634(nucleus);GO:0006355(regulation of transcription, DNA-templated);GO:0045892(negative regulation of transcription, DNA-templated);GO:0140110(transcription regulator activity)	NA	K22388	NA
1	ENSDARG00000079939	jmjd1cb	1.59244	1.06995	0.573702	1.31986e-09	3.21927e-05	jumonji domain containing 1Cb [Source:ZFIN;Acc:ZDB-GENE-121214-344]	GO:0000785(chromatin);GO:0000976(transcription regulatory region sequence-specific DNA binding);GO:0005634(nucleus);GO:0030097(hemopoiesis);GO:0031490(chromatin DNA binding);GO:0032454(histone demethylase activity (H3-K9 specific));GO:0033169(histone H3-K9 demethylation);GO:0061515(myeloid cell development)	NA	K11449	EC:1.14.11.-
1	ENSDARG00000042725	cebpb	22.3282	16.6928	0.419637	1.43318e-09	3.49566e-05	CCAAT enhancer binding protein beta [Source:ZFIN;Acc:ZDB-GENE-020111-3]	GO:0001878(response to yeast);GO:0003677(DNA binding);GO:0003700(DNA-binding transcription factor activity);GO:0005634(nucleus);GO:0006355(regulation of transcription, DNA-templated);GO:0009617(response to bacterium);GO:0044030(regulation of DNA methylation)	NA	K10048	NA
1	ENSDARG00000068367	nfkbie	7.76592	5.83261	0.413015	3.31373e-09	8.08253e-05	nuclear factor of kappa light polypeptide gene enhancer in B-cells inhibitor, epsilon [Source:ZFIN;Acc:ZDB-GENE-061215-132]	GO:0003674(molecular_function);GO:0005515(protein binding);GO:0005575(cellular_component);GO:0008150(biological_process)	04920(Adipocytokine signaling pathway)	K05872	NA
1	ENSDARG00000104303	FP085399.4	0.553405	0.422639	0.388908	4.04133e-09	9.85721e-05	NA	NA	NA	NA	NA
1	ENSDARG00000069742	cul5a	0.478142	0.358517	0.415399	4.68335e-09	0.000114232	cullin 5a [Source:ZFIN;Acc:ZDB-GENE-030131-5426]	GO:0006511(ubiquitin-dependent protein catabolic process);GO:0016567(protein ubiquitination);GO:0019005(SCF ubiquitin ligase complex);GO:0031146(SCF-dependent proteasomal ubiquitin-dependent protein catabolic process);GO:0031461(cullin-RING ubiquitin ligase complex);GO:0031466(Cul5-RING ubiquitin ligase complex);GO:0031625(ubiquitin protein ligase binding);GO:0043161(proteasome-mediated ubiquitin…	04120(Ubiquitin mediated proteolysis)	K10612	NA
1	ENSDARG00000101609	si:dkey-109a10.2	2.59569	2.00954	0.369254	4.80872e-09	0.00011729	si:dkey-109a10.2 [Source:ZFIN;Acc:ZDB-GENE-141212-404]	GO:0016020(membrane);GO:0016021(integral component of membrane)	NA	NA	NA
1	ENSDARG00000003941	rrs1	1.49681	1.10748	0.434612	4.93111e-09	0.000120275	RRS1 ribosome biogenesis regulator homolog (S. cerevisiae) [Source:ZFIN;Acc:ZDB-GENE-030131-9345]	GO:0000055(ribosomal large subunit export from nucleus);GO:0000447(endonucleolytic cleavage in ITS1 to separate SSU-rRNA from 5.8S rRNA and LSU-rRNA from tricistronic rRNA transcript (SSU-rRNA, 5.8S rRNA, LSU-rRNA));GO:0003674(molecular_function);GO:0005634(nucleus);GO:0005730(nucleolus);GO:0030687(preribosome, large subunit precursor);GO:0042254(ribosome biogenesis);GO:0042273(ribosomal large su…	NA	K14852	NA
1	ENSDARG00000013681	si:dkey-42i9.6	0.955434	0.715161	0.417889	5.93907e-09	0.00014486	si:dkey-42i9.6 [Source:ZFIN;Acc:ZDB-GENE-030131-6596]	GO:0016020(membrane);GO:0016021(integral component of membrane)	04115(p53 signaling pathway)	K10135	NA
1	ENSDARG00000091131	cry3b	1.2182	0.851773	0.516209	6.00725e-09	0.000146523	cryptochrome circadian regulator 3b [Source:ZFIN;Acc:ZDB-GENE-010426-5]	GO:0045892(negative regulation of transcription, DNA-templated)	NA	NA	NA
1	ENSDARG00000100020	pim1	4.54892	3.02754	0.587377	6.58478e-09	0.000160609	Pim-1 proto-oncogene, serine/threonine kinase [Source:ZFIN;Acc:ZDB-GENE-061013-139]	GO:0000166(nucleotide binding);GO:0004672(protein kinase activity);GO:0004674(protein serine/threonine kinase activity);GO:0005524(ATP binding);GO:0005737(cytoplasm);GO:0006468(protein phosphorylation);GO:0007634(optokinetic behavior);GO:0016301(kinase activity);GO:0016310(phosphorylation);GO:0016740(transferase activity);GO:0043066(negative regulation of apoptotic process);GO:0046777(protein aut…	04933(AGE-RAGE signaling pathway in diabetic complications)	K04702	EC:2.7.11.1
1	ENSDARG00000105033	BX897691.1	1.00428	0.684069	0.553948	1.24573e-08	0.000303846	B- and T-lymphocyte attenuator-like [Source:NCBI gene;Acc:103910066]	GO:0002768(immune response-regulating cell surface receptor signaling pathway);GO:0005887(integral component of plasma membrane);GO:0016020(membrane);GO:0016021(integral component of membrane);GO:0038023(signaling receptor activity)	NA	K06707	NA
1	ENSDARG00000023217	crema	2.95974	2.00425	0.562408	1.56859e-08	0.000382596	cAMP responsive element modulator a [Source:ZFIN;Acc:ZDB-GENE-030131-7031]	GO:0003677(DNA binding);GO:0003700(DNA-binding transcription factor activity);GO:0005515(protein binding);GO:0005634(nucleus);GO:0005667(transcription factor complex);GO:0006355(regulation of transcription, DNA-templated)	04261(Adrenergic signaling in cardiomyocytes)	K09052	NA
1	ENSDARG00000015890	mafa	1.52032	1.03025	0.561381	2.23039e-08	0.000544015	v-maf avian musculoaponeurotic fibrosarcoma oncogene homolog a (paralog a) [Source:ZFIN;Acc:ZDB-GENE-010605-2]	GO:0000978(RNA polymerase II proximal promoter sequence-specific DNA binding);GO:0003677(DNA binding);GO:0003700(DNA-binding transcription factor activity);GO:0005634(nucleus);GO:0006355(regulation of transcription, DNA-templated);GO:0043565(sequence-specific DNA binding)	NA	K09035	NA
1	ENSDARG00000038687	nfkb2	6.37918	4.66434	0.451699	2.53028e-08	0.000617161	nuclear factor of kappa light polypeptide gene enhancer in B-cells 2 (p49/p100) [Source:ZFIN;Acc:ZDB-GENE-030131-6701]	GO:0001525(angiogenesis);GO:0003677(DNA binding);GO:0003700(DNA-binding transcription factor activity);GO:0005515(protein binding);GO:0005634(nucleus);GO:0005737(cytoplasm);GO:0006355(regulation of transcription, DNA-templated);GO:0007165(signal transduction)	04010(MAPK signaling pathway);04625(C-type lectin receptor signaling pathway)	K04469	NA
1	ENSDARG00000079553	cd83	5.83893	3.62739	0.686772	3.22436e-08	0.000786454	CD83 molecule [Source:ZFIN;Acc:ZDB-GENE-060503-762]	GO:0002286(T cell activation involved in immune response);GO:0002468(dendritic cell antigen processing and presentation);GO:0009986(cell surface);GO:0016020(membrane);GO:0016021(integral component of membrane);GO:0071753(IgM immunoglobulin complex)	NA	K06510	NA
1	ENSDARG00000105136	ccdc50	0.584028	0.424269	0.461058	3.63836e-08	0.000887433	coiled-coil domain containing 50 [Source:ZFIN;Acc:ZDB-GENE-150115-1]	NA	NA	NA	NA
1	ENSDARG00000034503	per2	1.54862	1.09941	0.494258	4.49596e-08	0.00109661	period circadian clock 2 [Source:ZFIN;Acc:ZDB-GENE-011220-2]	GO:0000122(negative regulation of transcription by RNA polymerase II);GO:0000976(transcription regulatory region sequence-specific DNA binding);GO:0001222(transcription corepressor binding);GO:0003682(chromatin binding);GO:0005515(protein binding);GO:0005634(nucleus);GO:0005737(cytoplasm);GO:0008134(transcription factor binding);GO:0009409(response to cold);GO:0009411(response to UV);GO:0009416(r…	NA	K02633	NA
1	ENSDARG00000020235	sept9a	0.404056	0.323233	0.321979	4.63841e-08	0.00113135	septin 9a [Source:ZFIN;Acc:ZDB-GENE-030131-9187]	GO:0000166(nucleotide binding);GO:0003924(GTPase activity);GO:0005525(GTP binding);GO:0005940(septin ring);GO:0015630(microtubule cytoskeleton);GO:0031105(septin complex);GO:0032947(protein-containing complex scaffold activity);GO:0061640(cytoskeleton-dependent cytokinesis)	NA	K16938	NA
1	ENSDARG00000074060	map3k14a	1.24615	0.934177	0.415714	5.01504e-08	0.00122322	mitogen-activated protein kinase kinase kinase 14a [Source:ZFIN;Acc:ZDB-GENE-120215-80]	GO:0004672(protein kinase activity);GO:0004674(protein serine/threonine kinase activity);GO:0005524(ATP binding);GO:0005737(cytoplasm);GO:0006468(protein phosphorylation);GO:0023014(signal transduction by protein phosphorylation);GO:0031098(stress-activated protein kinase signaling cascade);GO:0032147(activation of protein kinase activity)	04010(MAPK signaling pathway);04210(Apoptosis);04625(C-type lectin receptor signaling pathway);04672(Intestinal immune network for IgA production)	K04466	EC:2.7.11.25
1	ENSDARG00000031100	ivns1abpa	1.15969	0.828904	0.484467	6.3283e-08	0.00154354	influenza virus NS1A binding protein a [Source:ZFIN;Acc:ZDB-GENE-031222-2]	GO:0005515(protein binding);GO:0005634(nucleus);GO:0005737(cytoplasm);GO:0005856(cytoskeleton);GO:0015629(actin cytoskeleton)	NA	NA	NA
1	ENSDARG00000071203	sptssa	1.55079	1.17246	0.403468	6.60807e-08	0.00161177	serine palmitoyltransferase, small subunit A [Source:ZFIN;Acc:ZDB-GENE-050320-26]	GO:0004758(serine C-palmitoyltransferase activity);GO:0005783(endoplasmic reticulum);GO:0005789(endoplasmic reticulum membrane);GO:0006629(lipid metabolic process);GO:0006665(sphingolipid metabolic process);GO:0016020(membrane);GO:0016021(integral component of membrane);GO:0017059(serine C-palmitoyltransferase complex)	NA	NA	NA
1	ENSDARG00000067723	tank	0.979296	0.73205	0.419804	6.91107e-08	0.00168568	TRAF family member-associated NFKB activator [Source:ZFIN;Acc:ZDB-GENE-060929-308]	GO:0003674(molecular_function);GO:0007249(I-kappaB kinase/NF-kappaB signaling)	04621(NOD-like receptor signaling pathway);04622(RIG-I-like receptor signaling pathway)	K12650	NA
1	ENSDARG00000115335	ubald2	0.341959	0.274628	0.316345	6.91164e-08	0.00168582	UBA-like domain containing 2 [Source:ZFIN;Acc:ZDB-GENE-050522-185]	GO:0005515(protein binding)	NA	NA	NA
1	ENSDARG00000020960	hgs	0.856007	0.633897	0.433375	9.61558e-08	0.00234534	hepatocyte growth factor-regulated tyrosine kinase substrate [Source:ZFIN;Acc:ZDB-GENE-030131-6107]	GO:0005623(cell);GO:0006886(intracellular protein transport);GO:0046872(metal ion binding)	04144(Endocytosis);04145(Phagosome)	K12182	NA
1	ENSDARG00000052091	rbpjb	1.56119	1.13606	0.458612	1.16286e-07	0.00283633	recombination signal binding protein for immunoglobulin kappa J region b [Source:ZFIN;Acc:ZDB-GENE-070319-1]	GO:0000122(negative regulation of transcription by RNA polymerase II);GO:0000978(RNA polymerase II proximal promoter sequence-specific DNA binding);GO:0001103(RNA polymerase II repressing transcription factor binding);GO:0001228(DNA-binding transcription activator activity, RNA polymerase II-specific);GO:0001756(somitogenesis);GO:0002040(sprouting angiogenesis);GO:0002193(MAML1-RBP-Jkappa- ICN1 c…	04330(Notch signaling pathway)	K06053	NA
1	ENSDARG00000098671	prelid1a	2.82963	2.14839	0.397355	1.19451e-07	0.00291354	PRELI domain containing 1a [Source:ZFIN;Acc:ZDB-GENE-040426-1341]	GO:0005758(mitochondrial intermembrane space);GO:0015914(phospholipid transport);GO:1990050(phosphatidic acid transporter activity)	NA	NA	NA
1	ENSDARG00000089838	si:dkey-262k9.4	2.81858	2.09316	0.429289	1.39301e-07	0.0033977	si:dkey-262k9.4 [Source:ZFIN;Acc:ZDB-GENE-131121-545]	GO:0006811(ion transport);GO:0016020(membrane);GO:0016021(integral component of membrane);GO:0017080(sodium channel regulator activity);GO:0043269(regulation of ion transport);GO:0099106(ion channel regulator activity);GO:2000649(regulation of sodium ion transmembrane transporter activity)	NA	K13362	NA
1	ENSDARG00000017037	ikbkg	1.73304	1.25061	0.470669	1.57003e-07	0.00382947	inhibitor of kappa light polypeptide gene enhancer in B-cells, kinase gamma [Source:ZFIN;Acc:ZDB-GENE-050327-68]	GO:0005634(nucleus);GO:0005737(cytoplasm);GO:0007252(I-kappaB phosphorylation);GO:0043123(positive regulation of I-kappaB kinase/NF-kappaB signaling);GO:0070530(K63-linked polyubiquitin modification-dependent protein binding)	04010(MAPK signaling pathway);04210(Apoptosis);04620(Toll-like receptor signaling pathway);04621(NOD-like receptor signaling pathway);04622(RIG-I-like receptor signaling pathway);04623(Cytosolic DNA-sensing pathway);04625(C-type lectin receptor signaling pathway);04920(Adipocytokine signaling pathway);05168(Herpes simplex virus 1 infection)	K07210	NA
1	ENSDARG00000017741	g3bp1	2.45541	1.82577	0.427462	1.74941e-07	0.00426698	GTPase activating protein (SH3 domain) binding protein 1 [Source:ZFIN;Acc:ZDB-GENE-030131-7452]	GO:0003676(nucleic acid binding);GO:0003723(RNA binding);GO:0003729(mRNA binding);GO:0005829(cytosol);GO:1990904(ribonucleoprotein complex)	NA	K17265	3.6.4.13;EC:3.6.4.12
1	ENSDARG00000069066	nufip2	0.843957	0.647584	0.382103	1.92865e-07	0.00470417	nuclear FMR1 interacting protein 2 [Source:ZFIN;Acc:ZDB-GENE-041111-7]	GO:0003723(RNA binding);GO:0005575(cellular_component);GO:0008150(biological_process)	NA	NA	NA
1	ENSDARG00000000857	mapk14a	0.58828	0.453709	0.374736	2.19501e-07	0.00535386	mitogen-activated protein kinase 14a [Source:ZFIN;Acc:ZDB-GENE-010202-2]	GO:0000166(nucleotide binding);GO:0001756(somitogenesis);GO:0004672(protein kinase activity);GO:0004674(protein serine/threonine kinase activity);GO:0004707(MAP kinase activity);GO:0005524(ATP binding);GO:0005634(nucleus);GO:0005737(cytoplasm);GO:0006357(regulation of transcription by RNA polymerase II);GO:0006468(protein phosphorylation);GO:0007275(multicellular organism development);GO:0010468(…	04010(MAPK signaling pathway);04068(FoxO signaling pathway);04218(Cellular senescence);04261(Adrenergic signaling in cardiomyocytes);04370(VEGF signaling pathway);04620(Toll-like receptor signaling pathway);04621(NOD-like receptor signaling pathway);04622(RIG-I-like receptor signaling pathway);04625(C-type lectin receptor signaling pathway);04912(GnRH signaling pathway);04914(Progesterone-mediate…	K04441	EC:2.7.11.24
1	ENSDARG00000017365	slc23a2	0.722526	0.568326	0.346333	2.42463e-07	0.00591392	solute carrier family 23 (ascorbic acid transporter), member 2 [Source:ZFIN;Acc:ZDB-GENE-090521-3]	GO:0005215(transporter activity);GO:0005737(cytoplasm);GO:0005886(plasma membrane);GO:0005887(integral component of plasma membrane);GO:0008520(L-ascorbate:sodium symporter activity);GO:0009925(basal plasma membrane);GO:0015882(L-ascorbic acid transmembrane transport);GO:0016020(membrane);GO:0016021(integral component of membrane);GO:0016324(apical plasma membrane);GO:0019852(L-ascorbic acid meta…	NA	K14611	NA
1	ENSDARG00000062909	furina	0.697806	0.526488	0.406426	2.6207e-07	0.00639214	furin (paired basic amino acid cleaving enzyme) a [Source:ZFIN;Acc:ZDB-GENE-040901-1]	GO:0001947(heart looping);GO:0003140(determination of left/right asymmetry in lateral mesoderm);GO:0003146(heart jogging);GO:0004252(serine-type endopeptidase activity);GO:0005802(trans-Golgi network);GO:0006508(proteolysis);GO:0008233(peptidase activity);GO:0008236(serine-type peptidase activity);GO:0009617(response to bacterium);GO:0016020(membrane);GO:0016021(integral component of membrane);GO…	NA	K01349	EC:3.4.21.75
1	ENSDARG00000021225	prkci	0.516004	0.417893	0.304248	3.29186e-07	0.00802918	protein kinase C, iota [Source:ZFIN;Acc:ZDB-GENE-011105-1]	GO:0000132(establishment of mitotic spindle orientation);GO:0000166(nucleotide binding);GO:0001738(morphogenesis of a polarized epithelium);GO:0001841(neural tube formation);GO:0004672(protein kinase activity);GO:0004674(protein serine/threonine kinase activity);GO:0004697(protein kinase C activity);GO:0005515(protein binding);GO:0005524(ATP binding);GO:0005543(phospholipid binding);GO:0005634(nu…	04144(Endocytosis);04530(Tight junction);04910(Insulin signaling pathway)	K06069	EC:2.7.11.13
1	ENSDARG00000093799	setbp1	1.43339	1.00174	0.516923	7.3159e-07	0.0178442	SET binding protein 1 [Source:ZFIN;Acc:ZDB-GENE-060526-72]	GO:0003677(DNA binding)	NA	K23217	NA
1	ENSDARG00000102317	rpl26	9.08133	7.23228	0.328453	9.97318e-07	0.0243256	ribosomal protein L26 [Source:ZFIN;Acc:ZDB-GENE-040426-2117]	GO:0002181(cytoplasmic translation);GO:0003723(RNA binding);GO:0003735(structural constituent of ribosome);GO:0005622(intracellular);GO:0005840(ribosome);GO:0006412(translation);GO:0007634(optokinetic behavior);GO:0015934(large ribosomal subunit);GO:0022625(cytosolic large ribosomal subunit);GO:0042273(ribosomal large subunit biogenesis);GO:0055085(transmembrane transport);GO:0060059(embryonic re…	03010(Ribosome)	K02898	NA
1	ENSDARG00000100536	nkrf	0.642136	0.53526	0.262637	1.10295e-06	0.0269019	NFKB repressing factor [Source:ZFIN;Acc:ZDB-GENE-030616-73]	GO:0003676(nucleic acid binding);GO:0005654(nucleoplasm);GO:0005730(nucleolus)	NA	NA	NA
1	ENSDARG00000006200	eif4g1a	2.26039	1.66157	0.444028	1.16523e-06	0.0284211	eukaryotic translation initiation factor 4 gamma, 1a [Source:ZFIN;Acc:ZDB-GENE-070112-702]	GO:0003723(RNA binding);GO:0003729(mRNA binding);GO:0003743(translation initiation factor activity);GO:0005515(protein binding);GO:0005575(cellular_component);GO:0006413(translational initiation);GO:0016281(eukaryotic translation initiation factor 4F complex)	03013(RNA transport)	K03260	NA
1	ENSDARG00000104342	csnk1g1	0.68486	0.524863	0.383866	1.19879e-06	0.0292396	casein kinase 1, gamma 1 [Source:ZFIN;Acc:ZDB-GENE-041212-63]	GO:0000166(nucleotide binding);GO:0004672(protein kinase activity);GO:0004674(protein serine/threonine kinase activity);GO:0005524(ATP binding);GO:0005634(nucleus);GO:0005737(cytoplasm);GO:0005886(plasma membrane);GO:0006468(protein phosphorylation);GO:0006897(endocytosis);GO:0016055(Wnt signaling pathway);GO:0016301(kinase activity);GO:0016310(phosphorylation);GO:0016740(transferase activity);GO…	04340(Hedgehog signaling pathway)	K08958	EC:2.7.11.1
1	ENSDARG00000078310	cecr2	0.426489	0.34851	0.291308	1.50523e-06	0.036714	cat eye syndrome chromosome region, candidate 2 [Source:ZFIN;Acc:ZDB-GENE-131121-533]	GO:0002244(hematopoietic progenitor cell differentiation);GO:0005515(protein binding)	NA	NA	NA
1	ENSDARG00000069142	aars	0.897084	0.696016	0.366124	1.51339e-06	0.036913	alanyl-tRNA synthetase [Source:ZFIN;Acc:ZDB-GENE-030131-3663]	GO:0000049(tRNA binding);GO:0000166(nucleotide binding);GO:0002161(aminoacyl-tRNA editing activity);GO:0002196(Ser-tRNA(Ala) hydrolase activity);GO:0003676(nucleic acid binding);GO:0003723(RNA binding);GO:0004812(aminoacyl-tRNA ligase activity);GO:0004813(alanine-tRNA ligase activity);GO:0005524(ATP binding);GO:0005737(cytoplasm);GO:0006400(tRNA modification);GO:0006412(translation);GO:0006419(al…	00970(Aminoacyl-tRNA biosynthesis)	K01872	EC:6.1.1.7
1	ENSDARG00000030933	ksr1b	1.63082	1.22687	0.410611	1.55939e-06	0.038035	kinase suppressor of ras 1b [Source:ZFIN;Acc:ZDB-GENE-040724-45]	GO:0004672(protein kinase activity);GO:0005524(ATP binding);GO:0006468(protein phosphorylation);GO:0007265(Ras protein signal transduction);GO:0035556(intracellular signal transduction);GO:0046872(metal ion binding)	NA	NA	NA
1	ENSDARG00000096331	si:ch73-248e21.7	1.19045	0.869975	0.452455	1.63777e-06	0.0399467	si:ch73-248e21.7 [Source:ZFIN;Acc:ZDB-GENE-120215-231]	GO:0016020(membrane);GO:0016021(integral component of membrane)	NA	NA	NA
1	ENSDARG00000112454	FO744833.2	1.23177	0.908006	0.439965	1.65737e-06	0.0404248	poly [ADP-ribose] polymerase 14 [Source:NCBI gene;Acc:562648]	GO:0003676(nucleic acid binding);GO:0003950(NAD+ ADP-ribosyltransferase activity);GO:0016740(transferase activity);GO:0016757(transferase activity, transferring glycosyl groups)	NA	K15261	EC:2.4.2.30
1	ENSDARG00000006074	uck2a	0.914769	0.667227	0.455229	1.68871e-06	0.0411894	uridine-cytidine kinase 2a [Source:ZFIN;Acc:ZDB-GENE-030131-7158]	GO:0000166(nucleotide binding);GO:0004849(uridine kinase activity);GO:0005524(ATP binding);GO:0005829(cytosol);GO:0006238(CMP salvage);GO:0016301(kinase activity);GO:0016310(phosphorylation);GO:0016740(transferase activity);GO:0019206(nucleoside kinase activity);GO:0044206(UMP salvage);GO:0044211(CTP salvage)	00240(Pyrimidine metabolism);00983(Drug metabolism - other enzymes)	K00876	EC:2.7.1.48
1	ENSDARG00000002131	celf2	1.6702	1.26155	0.40483	1.92035e-06	0.0468392	cugbp, Elav-like family member 2 [Source:ZFIN;Acc:ZDB-GENE-030826-35]	GO:0000381(regulation of alternative mRNA splicing, via spliceosome);GO:0003676(nucleic acid binding);GO:0003723(RNA binding);GO:0003729(mRNA binding);GO:0005634(nucleus);GO:0005737(cytoplasm);GO:0006376(mRNA splice site selection);GO:0006397(mRNA processing);GO:1990904(ribonucleoprotein complex)	NA	K13207	NA
1	ENSDARG00000071506	mgat5	0.749093	0.556041	0.429952	2.00758e-06	0.0489669	alpha-1,6-mannosylglycoprotein 6-beta-N-acetylglucosaminyltransferase [Source:ZFIN;Acc:ZDB-GENE-060616-238]	GO:0005794(Golgi apparatus);GO:0006487(protein N-linked glycosylation);GO:0016020(membrane);GO:0016021(integral component of membrane);GO:0030144(alpha-1,6-mannosylglycoprotein 6-beta-N-acetylglucosaminyltransferase activity);GO:0042246(tissue regeneration);GO:0070658(neuromast hair cell differentiation involved in neuromast regeneration)	00510(N-Glycan biosynthesis)	K00744	EC:2.4.1.155
1	ENSDARG00000020625	jak1	6.38067	5.02163	0.345551	3.52862e-06	0.0860665	Janus kinase 1 [Source:ZFIN;Acc:ZDB-GENE-980526-142]	GO:0000166(nucleotide binding);GO:0004672(protein kinase activity);GO:0004713(protein tyrosine kinase activity);GO:0004715(non-membrane spanning protein tyrosine kinase activity);GO:0005524(ATP binding);GO:0005856(cytoskeleton);GO:0006468(protein phosphorylation);GO:0016020(membrane);GO:0016301(kinase activity);GO:0016310(phosphorylation);GO:0016740(transferase activity);GO:0018108(peptidyl-tyros…	04217(Necroptosis);04621(NOD-like receptor signaling pathway);05168(Herpes simplex virus 1 infection)	K11217	EC:2.7.10.2
1	ENSDARG00000040118	zgc:113232	0.362775	0.29032	0.321433	4.17522e-06	0.101838	zgc:113232 [Source:ZFIN;Acc:ZDB-GENE-050327-86]	GO:0003674(molecular_function);GO:0005201(extracellular matrix structural constituent);GO:0005615(extracellular space);GO:0030198(extracellular matrix organization);GO:0031012(extracellular matrix)	NA	NA	NA
1	ENSDARG00000070545	top1l	1.50661	1.19864	0.329913	4.78486e-06	0.116708	DNA topoisomerase I, like [Source:ZFIN;Acc:ZDB-GENE-060616-217]	GO:0003677(DNA binding);GO:0003916(DNA topoisomerase activity);GO:0003917(DNA topoisomerase type I activity);GO:0005694(chromosome);GO:0005730(nucleolus);GO:0006260(DNA replication);GO:0006265(DNA topological change);GO:0006338(chromatin remodeling);GO:0007059(chromosome segregation);GO:0016853(isomerase activity);GO:0031298(replication fork protection complex)	NA	K03163	EC:5.6.2.1
1	ENSDARG00000059654	eif3ba	2.64267	2.13265	0.309347	5.1134e-06	0.124721	eukaryotic translation initiation factor 3, subunit Ba [Source:ZFIN;Acc:ZDB-GENE-030131-2748]	GO:0001732(formation of cytoplasmic translation initiation complex);GO:0002183(cytoplasmic translational initiation);GO:0003313(heart rudiment development);GO:0003676(nucleic acid binding);GO:0003723(RNA binding);GO:0003743(translation initiation factor activity);GO:0005515(protein binding);GO:0005737(cytoplasm);GO:0005852(eukaryotic translation initiation factor 3 complex);GO:0006412(translation…	03013(RNA transport)	K03253	NA
1	ENSDARG00000018111	kdm7aa	0.721976	0.575805	0.326372	5.68702e-06	0.138712	lysine (K)-specific demethylase 7Aa [Source:ZFIN;Acc:ZDB-GENE-030131-9829]	GO:0005634(nucleus);GO:0006325(chromatin organization);GO:0007399(nervous system development);GO:0016491(oxidoreductase activity);GO:0016706(2-oxoglutarate-dependent dioxygenase activity);GO:0030901(midbrain development);GO:0032454(histone demethylase activity (H3-K9 specific));GO:0033169(histone H3-K9 demethylation);GO:0035574(histone H4-K20 demethylation);GO:0035575(histone demethylase activity…	NA	K11445	EC:1.14.11.-
1	ENSDARG00000058094	ciarta	2.48679	1.85949	0.41938	5.76734e-06	0.140671	circadian associated repressor of transcription a [Source:ZFIN;Acc:ZDB-GENE-030131-7016]	GO:0000976(transcription regulatory region sequence-specific DNA binding);GO:0000980(RNA polymerase II distal enhancer sequence-specific DNA binding);GO:0005634(nucleus);GO:0032922(circadian regulation of gene expression);GO:0045892(negative regulation of transcription, DNA-templated)	NA	K21599	NA
1	ENSDARG00000052419	ankrd12	3.5161	2.79226	0.332544	7.5243e-06	0.183525	ankyrin repeat domain 12 [Source:ZFIN;Acc:ZDB-GENE-040426-846]	GO:0003674(molecular_function);GO:0005515(protein binding);GO:0005575(cellular_component);GO:0008150(biological_process)	NA	K21436	NA
1	ENSDARG00000076404	mctp1a	0.594753	0.459969	0.370753	8.86438e-06	0.216211	multiple C2 domains, transmembrane 1a [Source:ZFIN;Acc:ZDB-GENE-110125-3]	GO:0016020(membrane);GO:0016021(integral component of membrane);GO:0030672(synaptic vesicle membrane)	NA	NA	NA
1	ENSDARG00000103505	fbxl3a	1.63505	1.30407	0.326312	9.96831e-06	0.243137	F-box and leucine-rich repeat protein 3a [Source:ZFIN;Acc:ZDB-GENE-030912-5]	GO:0005515(protein binding);GO:0005634(nucleus);GO:0005829(cytosol);GO:0016567(protein ubiquitination);GO:0019005(SCF ubiquitin ligase complex);GO:0031146(SCF-dependent proteasomal ubiquitin-dependent protein catabolic process);GO:0043153(entrainment of circadian clock by photoperiod);GO:0061630(ubiquitin protein ligase activity)	NA	K10269	NA
1	ENSDARG00000019302	mid1ip1b	2.69643	1.98891	0.439071	1.03109e-05	0.251493	MID1 interacting protein 1b [Source:ZFIN;Acc:ZDB-GENE-040426-1720]	GO:0003674(molecular_function);GO:0005634(nucleus);GO:0005737(cytoplasm);GO:0005856(cytoskeleton);GO:0005874(microtubule);GO:0008150(biological_process)	NA	NA	NA
1	ENSDARG00000025269	pdcd6ip	1.60808	1.25995	0.351973	1.10396e-05	0.269267	programmed cell death 6 interacting protein [Source:ZFIN;Acc:ZDB-GENE-040426-2678]	GO:0003674(molecular_function);GO:0005515(protein binding);GO:0005575(cellular_component)	04144(Endocytosis)	K12200	NA
1	ENSDARG00000097889	si:ch73-265h17.2	0.467348	0.376276	0.312709	1.14677e-05	0.27971	si:ch73-265h17.2 [Source:ZFIN;Acc:ZDB-GENE-131120-39]	NA	NA	NA	NA
1	ENSDARG00000095724	si:ch211-196c10.15	1.00208	0.777871	0.365395	1.35449e-05	0.330373	si:ch211-196c10.15 [Source:ZFIN;Acc:ZDB-GENE-141216-138]	NA	NA	NA	NA
1	ENSDARG00000069031	plac8l1	1.68392	1.29049	0.383905	1.50726e-05	0.367637	PLAC8-like 1 [Source:ZFIN;Acc:ZDB-GENE-091204-165]	NA	NA	NA	NA
1	ENSDARG00000023303	zgc:66427	0.963966	0.766923	0.329901	1.59511e-05	0.389063	zgc:66427 [Source:ZFIN;Acc:ZDB-GENE-040426-1913]	NA	NA	K10694	EC:2.3.2.27
1	ENSDARG00000070981	ash1l	1.03429	0.86269	0.261722	1.61257e-05	0.393322	ash1 (absent, small, or homeotic)-like (Drosophila) [Source:ZFIN;Acc:ZDB-GENE-030131-6101]	GO:0003677(DNA binding);GO:0003682(chromatin binding);GO:0005515(protein binding);GO:0005634(nucleus);GO:0008168(methyltransferase activity);GO:0016740(transferase activity);GO:0018024(histone-lysine N-methyltransferase activity);GO:0032259(methylation);GO:0034968(histone lysine methylation);GO:0046872(metal ion binding)	00310(Lysine degradation)	K06101	EC:2.1.1.43
1	ENSDARG00000030789	ddx18	1.04265	0.796776	0.388008	1.74561e-05	0.425773	DEAD (Asp-Glu-Ala-Asp) box polypeptide 18 [Source:ZFIN;Acc:ZDB-GENE-030131-9685]	GO:0000166(nucleotide binding);GO:0003676(nucleic acid binding);GO:0003723(RNA binding);GO:0004386(helicase activity);GO:0005524(ATP binding);GO:0016787(hydrolase activity);GO:0030097(hemopoiesis);GO:0030099(myeloid cell differentiation)	NA	K13179	EC:3.6.4.13
1	ENSDARG00000015889	zc3h15	0.69845	0.575681	0.278886	1.84372e-05	0.449702	zinc finger CCCH-type containing 15 [Source:ZFIN;Acc:ZDB-GENE-030131-6239]	GO:0046872(metal ion binding)	NA	NA	NA
1	ENSDARG00000038785	abcf2a	1.28535	1.02525	0.326184	1.86468e-05	0.454814	ATP-binding cassette, sub-family F (GCN20), member 2a [Source:ZFIN;Acc:ZDB-GENE-030131-8714]	GO:0000166(nucleotide binding);GO:0005524(ATP binding);GO:0016887(ATPase activity)	NA	K06185	NA
1	ENSDARG00000061459	si:dkey-253i9.4	1.41929	1.04396	0.443108	2.01014e-05	0.490294	si:dkey-253i9.4 [Source:ZFIN;Acc:ZDB-GENE-090313-280]	GO:0005085(guanyl-nucleotide exchange factor activity);GO:0005096(GTPase activator activity);GO:0005515(protein binding);GO:0005622(intracellular);GO:0007165(signal transduction);GO:0007264(small GTPase mediated signal transduction);GO:0017034(Rap guanyl-nucleotide exchange factor activity);GO:0042127(regulation of cell population proliferation);GO:0043547(positive regulation of GTPase activity)	04010(MAPK signaling pathway);04530(Tight junction)	K08018	NA
1	ENSDARG00000059908	si:ch211-217k17.7	1.41938	1.11035	0.354245	2.04263e-05	0.498217	si:ch211-217k17.7 [Source:ZFIN;Acc:ZDB-GENE-061009-11]	NA	NA	K14822	NA
1	ENSDARG00000078118	sinhcafl.1	0.492595	0.395461	0.316865	2.24292e-05	0.547071	SIN3-HDAC complex associated factor, like [Source:ZFIN;Acc:ZDB-GENE-031114-2]	NA	NA	NA	NA
1	ENSDARG00000078619	pnp5a	2.24816	1.67581	0.423892	2.42662e-05	0.591876	purine nucleoside phosphorylase 5a [Source:ZFIN;Acc:ZDB-GENE-040426-2553]	GO:0003824(catalytic activity);GO:0004731(purine-nucleoside phosphorylase activity);GO:0005737(cytoplasm);GO:0006139(nucleobase-containing compound metabolic process);GO:0009116(nucleoside metabolic process);GO:0016740(transferase activity);GO:0016757(transferase activity, transferring glycosyl groups)	00230(Purine metabolism);00240(Pyrimidine metabolism);00760(Nicotinate and nicotinamide metabolism)	K03783	EC:2.4.2.1
1	ENSDARG00000055966	cflara	1.36935	1.07264	0.352324	2.43043e-05	0.592806	CASP8 and FADD-like apoptosis regulator a [Source:ZFIN;Acc:ZDB-GENE-030826-3]	GO:0004197(cysteine-type endopeptidase activity);GO:0005515(protein binding);GO:0005737(cytoplasm);GO:0006508(proteolysis);GO:0006915(apoptotic process);GO:0008234(cysteine-type peptidase activity);GO:0042981(regulation of apoptotic process);GO:0097153(cysteine-type endopeptidase activity involved in apoptotic process)	04140(Autophagy - animal);04210(Apoptosis);04217(Necroptosis)	K04724	NA
1	ENSDARG00000114063	parm1	1.31147	1.02173	0.360167	2.56427e-05	0.62545	prostate androgen-regulated mucin-like protein 1 [Source:ZFIN;Acc:ZDB-GENE-140106-262]	GO:0016020(membrane);GO:0016021(integral component of membrane)	NA	NA	NA
1	ENSDARG00000075369	nck1b	0.466595	0.373985	0.31919	3.4285e-05	0.836246	NCK adaptor protein 1b [Source:ZFIN;Acc:ZDB-GENE-090317-1]	GO:0005070(SH3/SH2 adaptor activity);GO:0005515(protein binding);GO:0005737(cytoplasm);GO:0005783(endoplasmic reticulum);GO:0006417(regulation of translation);GO:0009967(positive regulation of signal transduction)	04012(ErbB signaling pathway)	K07365	NA
1	ENSDARG00000088087	kdm6ba	8.80057	6.73807	0.385261	3.56107e-05	0.86858	lysine (K)-specific demethylase 6B, a [Source:ZFIN;Acc:ZDB-GENE-091005-1]	GO:0000978(RNA polymerase II proximal promoter sequence-specific DNA binding);GO:0003682(chromatin binding);GO:0005634(nucleus);GO:0007507(heart development);GO:0031490(chromatin DNA binding);GO:0043565(sequence-specific DNA binding);GO:0044666(MLL3/4 complex);GO:0046872(metal ion binding);GO:0061384(heart trabecula morphogenesis);GO:0071557(histone H3-K27 demethylation);GO:0071558(histone demeth…	NA	K11448	EC:1.14.11.-
1	ENSDARG00000078775	RASA2	1.42291	1.15625	0.299397	3.65985e-05	0.892674	RAS p21 protein activator 2 [Source:NCBI gene;Acc:100331895]	GO:0005096(GTPase activator activity);GO:0005543(phospholipid binding);GO:0007165(signal transduction);GO:0035556(intracellular signal transduction);GO:0043087(regulation of GTPase activity);GO:0043547(positive regulation of GTPase activity);GO:0046580(negative regulation of Ras protein signal transduction)	04010(MAPK signaling pathway)	K08053	NA
1	ENSDARG00000103787	chd1	0.594813	0.482075	0.303177	3.74342e-05	0.913058	chromodomain helicase DNA binding protein 1 [Source:ZFIN;Acc:ZDB-GENE-030131-7120]	GO:0005524(ATP binding);GO:0005634(nucleus)	NA	K11367	EC:3.6.4.12
1	ENSDARG00000038754	plk3	6.37856	4.77678	0.417193	3.86134e-05	0.941819	polo-like kinase 3 (Drosophila) [Source:ZFIN;Acc:ZDB-GENE-030131-6134]	GO:0000166(nucleotide binding);GO:0000278(mitotic cell cycle);GO:0000922(spindle pole);GO:0004672(protein kinase activity);GO:0004674(protein serine/threonine kinase activity);GO:0005515(protein binding);GO:0005524(ATP binding);GO:0005634(nucleus);GO:0005737(cytoplasm);GO:0005813(centrosome);GO:0006468(protein phosphorylation);GO:0006974(cellular response to DNA damage stimulus);GO:0016301(kinase…	04068(FoxO signaling pathway);04625(C-type lectin receptor signaling pathway)	K08862	EC:2.7.11.21
1	ENSDARG00000068637	si:ch211-281l24.3	0.879047	0.681715	0.366771	4.16911e-05	1	si:ch211-281l24.3 [Source:ZFIN;Acc:ZDB-GENE-131121-575]	GO:0005515(protein binding)	NA	NA	NA
1	ENSDARG00000018411	mknk1	1.16869	0.897372	0.381109	4.56687e-05	1	MAP kinase interacting serine/threonine kinase 1 [Source:ZFIN;Acc:ZDB-GENE-080220-11]	GO:0000166(nucleotide binding);GO:0004672(protein kinase activity);GO:0004674(protein serine/threonine kinase activity);GO:0004683(calmodulin-dependent protein kinase activity);GO:0005516(calmodulin binding);GO:0005524(ATP binding);GO:0005634(nucleus);GO:0005737(cytoplasm);GO:0006468(protein phosphorylation);GO:0009931(calcium-dependent protein serine/threonine kinase activity);GO:0018105(peptidy…	04010(MAPK signaling pathway);04910(Insulin signaling pathway)	K04372	EC:2.7.11.1
1	ENSDARG00000074501	tnip2	2.4066	1.83876	0.388265	4.70598e-05	1	TNFAIP3 interacting protein 2 [Source:ZFIN;Acc:ZDB-GENE-120913-2]	GO:0070530(K63-linked polyubiquitin modification-dependent protein binding)	NA	NA	NA
1	ENSDARG00000061335	galnt1	0.890372	0.742883	0.261272	4.7939e-05	1	UDP-N-acetyl-alpha-D-galactosamine:polypeptide N-acetylgalactosaminyltransferase 1 [Source:ZFIN;Acc:ZDB-GENE-030131-2360]	GO:0000139(Golgi membrane);GO:0005794(Golgi apparatus);GO:0006486(protein glycosylation);GO:0016020(membrane);GO:0016021(integral component of membrane);GO:0016740(transferase activity);GO:0016757(transferase activity, transferring glycosyl groups);GO:0030246(carbohydrate binding)	00512(Mucin type O-glycan biosynthesis)	K00710	EC:2.4.1.41
1	ENSDARG00000021372	tob1b	3.2419	2.64563	0.293228	5.1503e-05	1	transducer of ERBB2, 1b [Source:ZFIN;Acc:ZDB-GENE-040426-2151]	GO:0003714(transcription corepressor activity);GO:0005634(nucleus);GO:0005737(cytoplasm);GO:0008285(negative regulation of cell population proliferation);GO:0010468(regulation of gene expression);GO:1903507(negative regulation of nucleic acid-templated transcription)	03018(RNA degradation)	K14443	NA
1	ENSDARG00000093602	si:ch211-93g21.1	1.69687	1.34458	0.335727	5.35361e-05	1	si:ch211-93g21.1 [Source:ZFIN;Acc:ZDB-GENE-060503-703]	GO:0016020(membrane);GO:0016021(integral component of membrane)	NA	NA	NA
1	ENSDARG00000031647	stat2	1.7857	1.33678	0.417736	5.65757e-05	1	signal transducer and activator of transcription 2 [Source:ZFIN;Acc:ZDB-GENE-080321-1]	GO:0003677(DNA binding);GO:0003700(DNA-binding transcription factor activity);GO:0005634(nucleus);GO:0005737(cytoplasm);GO:0006355(regulation of transcription, DNA-templated);GO:0007165(signal transduction)	NA	NA	NA
1	ENSDARG00000057053	zgc:91976	0.530688	0.431318	0.299114	6.71504e-05	1	zgc:91976 [Source:ZFIN;Acc:ZDB-GENE-041114-201]	GO:0005515(protein binding);GO:0005887(integral component of plasma membrane);GO:0006686(sphingomyelin biosynthetic process);GO:0016020(membrane);GO:0016021(integral component of membrane);GO:0030148(sphingolipid biosynthetic process);GO:0030173(integral component of Golgi membrane);GO:0030176(integral component of endoplasmic reticulum membrane);GO:0033188(sphingomyelin synthase activity);GO:004…	NA	NA	NA
1	ENSDARG00000086374	isg15	4.88602	2.72231	0.843829	6.74097e-05	1	ISG15 ubiquitin-like modifier [Source:ZFIN;Acc:ZDB-GENE-021211-1]	GO:0005515(protein binding);GO:0005634(nucleus);GO:0005737(cytoplasm);GO:0016567(protein ubiquitination);GO:0019941(modification-dependent protein catabolic process);GO:0031386(protein tag);GO:0031625(ubiquitin protein ligase binding)	NA	NA	NA
1	ENSDARG00000101849	adipor2	4.48251	3.57415	0.326705	7.17476e-05	1	adiponectin receptor 2 [Source:ZFIN;Acc:ZDB-GENE-041210-60]	GO:0005886(plasma membrane);GO:0016020(membrane);GO:0016021(integral component of membrane);GO:0033211(adiponectin-activated signaling pathway);GO:0038023(signaling receptor activity)	04920(Adipocytokine signaling pathway)	K07297	NA
1	ENSDARG00000098641	nbeal2	0.430954	0.353422	0.286142	7.46343e-05	1	neurobeachin-like 2 [Source:ZFIN;Acc:ZDB-GENE-100922-283]	GO:0005515(protein binding)	NA	K23286	NA
1	ENSDARG00000013500	abca2	0.788063	0.623593	0.337705	7.7571e-05	1	ATP-binding cassette, sub-family A (ABC1), member 2 [Source:ZFIN;Acc:ZDB-GENE-050517-1]	GO:0000166(nucleotide binding);GO:0005319(lipid transporter activity);GO:0005524(ATP binding);GO:0006869(lipid transport);GO:0016020(membrane);GO:0016021(integral component of membrane);GO:0016887(ATPase activity);GO:0042626(ATPase activity, coupled to transmembrane movement of substances);GO:0043231(intracellular membrane-bounded organelle);GO:0055085(transmembrane transport)	02010(ABC transporters);04142(Lysosome)	K05642	NA
1	ENSDARG00000079353	si:ch211-165d12.4	8.93488	6.26776	0.5115	8.57994e-05	1	si:ch211-165d12.4 [Source:ZFIN;Acc:ZDB-GENE-080303-7]	GO:0002250(adaptive immune response);GO:0016021(integral component of membrane);GO:0038023(signaling receptor activity)	00760(Nicotinate and nicotinamide metabolism)	K10524	2.7.1.173;EC:2.7.1.22
1	ENSDARG00000057497	stk35l	0.461586	0.370924	0.315476	9.07929e-05	1	serine/threonine kinase 35, like [Source:ZFIN;Acc:ZDB-GENE-041212-52]	GO:0000166(nucleotide binding);GO:0004672(protein kinase activity);GO:0004674(protein serine/threonine kinase activity);GO:0005524(ATP binding);GO:0005575(cellular_component);GO:0005634(nucleus);GO:0006468(protein phosphorylation);GO:0051321(meiotic cell cycle)	NA	K08859	EC:2.7.11.1
1	ENSDARG00000057913	syt11a	0.681103	0.561534	0.278501	9.13902e-05	1	synaptotagmin XIa [Source:ZFIN;Acc:ZDB-GENE-040426-2815]	GO:0000149(SNARE binding);GO:0001786(phosphatidylserine binding);GO:0005886(plasma membrane);GO:0014059(regulation of dopamine secretion);GO:0016020(membrane);GO:0016021(integral component of membrane);GO:0016192(vesicle-mediated transport);GO:0017156(calcium ion regulated exocytosis);GO:0017158(regulation of calcium ion-dependent exocytosis);GO:0030276(clathrin binding);GO:0030424(axon);GO:00430…	NA	K19911	NA
1	ENSDARG00000010519	per3	1.38558	1.05077	0.399044	9.15782e-05	1	period circadian clock 3 [Source:ZFIN;Acc:ZDB-GENE-000804-1]	GO:0000122(negative regulation of transcription by RNA polymerase II);GO:0000976(transcription regulatory region sequence-specific DNA binding);GO:0001222(transcription corepressor binding);GO:0005515(protein binding);GO:0005634(nucleus);GO:0005737(cytoplasm);GO:0008134(transcription factor binding);GO:0009416(response to light stimulus);GO:0009648(photoperiodism);GO:0032922(circadian regulation …	NA	K21945	NA
1	ENSDARG00000012244	ube2e3	1.52193	1.22891	0.308525	9.76233e-05	1	ubiquitin-conjugating enzyme E2E 3 (UBC4/5 homolog, yeast) [Source:ZFIN;Acc:ZDB-GENE-030131-408]	GO:0000166(nucleotide binding);GO:0005524(ATP binding);GO:0005575(cellular_component);GO:0016567(protein ubiquitination);GO:0016740(transferase activity);GO:0061631(ubiquitin conjugating enzyme activity)	04120(Ubiquitin mediated proteolysis)	K20217	EC:2.3.2.23
1	ENSDARG00000054290	acin1a	3.99702	3.25686	0.295442	9.77227e-05	1	apoptotic chromatin condensation inducer 1a [Source:ZFIN;Acc:ZDB-GENE-030616-583]	GO:0003676(nucleic acid binding)	03013(RNA transport);03015(mRNA surveillance pathway);03040(Spliceosome)	K12875	NA
1	ENSDARG00000111625	wu:fc75a09	0.714635	0.574707	0.314379	9.80627e-05	1	wu:fc75a09 [Source:ZFIN;Acc:ZDB-GENE-030131-4139]	NA	NA	NA	NA
1	ENSDARG00000022399	ntmt1	0.464498	0.377479	0.299273	9.81242e-05	1	N-terminal Xaa-Pro-Lys N-methyltransferase 1 [Source:ZFIN;Acc:ZDB-GENE-040426-2055]	GO:0006480(N-terminal protein amino acid methylation);GO:0008168(methyltransferase activity)	NA	K16219	EC:2.1.1.244
1	ENSDARG00000016830	rimkla	0.504589	0.416685	0.27615	0.000112542	1	ribosomal modification protein rimK-like family member A [Source:ZFIN;Acc:ZDB-GENE-040912-20]	GO:0000166(nucleotide binding);GO:0005524(ATP binding);GO:0005737(cytoplasm);GO:0006464(cellular protein modification process);GO:0016874(ligase activity);GO:0046872(metal ion binding);GO:0072590(N-acetyl-L-aspartate-L-glutamate ligase activity);GO:0072591(citrate-L-glutamate ligase activity)	00250(Alanine, aspartate and glutamate metabolism)	K18310	6.3.2.41;EC:6.3.1.17
1	ENSDARG00000040623	fosl2	6.99678	5.70966	0.293286	0.000114764	1	fos-like antigen 2 [Source:ZFIN;Acc:ZDB-GENE-070209-164]	GO:0000978(RNA polymerase II proximal promoter sequence-specific DNA binding);GO:0003677(DNA binding);GO:0003700(DNA-binding transcription factor activity);GO:0005634(nucleus);GO:0006355(regulation of transcription, DNA-templated);GO:0006357(regulation of transcription by RNA polymerase II);GO:2000690(regulation of cardiac muscle cell myoblast differentiation)	NA	K09030	NA
1	ENSDARG00000006283	waslb	0.452176	0.370592	0.287052	0.000115983	1	Wiskott-Aldrich syndrome-like b [Source:ZFIN;Acc:ZDB-GENE-040426-718]	GO:0000147(actin cortical patch assembly);GO:0003779(actin binding);GO:0005884(actin filament);GO:0006897(endocytosis);GO:0007015(actin filament organization);GO:0030048(actin filament-based movement);GO:0030097(hemopoiesis);GO:0030099(myeloid cell differentiation);GO:0030479(actin cortical patch);GO:0051015(actin filament binding);GO:0051127(positive regulation of actin nucleation);GO:0051666(ac…	04144(Endocytosis);04520(Adherens junction);04530(Tight junction);04810(Regulation of actin cytoskeleton);05132(Salmonella infection)	K05747	NA
1	ENSDARG00000055276	rel	4.9127	4.07555	0.26952	0.000116805	1	v-rel avian reticuloendotheliosis viral oncogene homolog [Source:ZFIN;Acc:ZDB-GENE-040718-255]	GO:0000122(negative regulation of transcription by RNA polymerase II);GO:0000977(RNA polymerase II regulatory region sequence-specific DNA binding);GO:0000981(DNA-binding transcription factor activity, RNA polymerase II-specific);GO:0003677(DNA binding);GO:0003682(chromatin binding);GO:0003700(DNA-binding transcription factor activity);GO:0005634(nucleus);GO:0005654(nucleoplasm);GO:0005737(cytopl…	NA	K09254	NA
1	ENSDARG00000045695	myca	3.82145	2.78757	0.455114	0.000117613	1	MYC proto-oncogene, bHLH transcription factor a [Source:ZFIN;Acc:ZDB-GENE-990415-162]	GO:0003677(DNA binding);GO:0003700(DNA-binding transcription factor activity);GO:0005634(nucleus);GO:0006355(regulation of transcription, DNA-templated);GO:0046983(protein dimerization activity)	NA	NA	NA
1	ENSDARG00000086103	slc37a1	0.634536	0.51524	0.300458	0.000129988	1	solute carrier family 37 (glucose-6-phosphate transporter), member 1 [Source:ZFIN;Acc:ZDB-GENE-041114-151]	GO:0016020(membrane);GO:0016021(integral component of membrane);GO:0022857(transmembrane transporter activity);GO:0055085(transmembrane transport)	NA	K13783	NA
1	ENSDARG00000000183	ptpn4b	3.16884	2.41231	0.393538	0.000146295	1	protein tyrosine phosphatase, non-receptor type 4b [Source:ZFIN;Acc:ZDB-GENE-030131-6259]	GO:0004721(phosphoprotein phosphatase activity);GO:0004725(protein tyrosine phosphatase activity);GO:0005515(protein binding);GO:0005737(cytoplasm);GO:0005856(cytoskeleton);GO:0006470(protein dephosphorylation);GO:0008092(cytoskeletal protein binding);GO:0016311(dephosphorylation);GO:0016787(hydrolase activity);GO:0016791(phosphatase activity);GO:0035335(peptidyl-tyrosine dephosphorylation)	NA	K18037	EC:3.1.3.48
1	ENSDARG00000100925	CU104709.1	0.637121	0.529122	0.267965	0.000160316	1	NA	NA	NA	NA	NA
1	ENSDARG00000104353	nop58	2.30913	1.85106	0.318992	0.00016253	1	NOP58 ribonucleoprotein homolog (yeast) [Source:ZFIN;Acc:ZDB-GENE-040426-2140]	GO:0030515(snoRNA binding);GO:0031428(box C/D snoRNP complex);GO:0032040(small-subunit processome)	03008(Ribosome biogenesis in eukaryotes)	K14565	NA
1	ENSDARG00000098825	farsa	0.509726	0.425222	0.261505	0.000162782	1	phenylalanyl-tRNA synthetase subunit alpha [Source:ZFIN;Acc:ZDB-GENE-050512-2]	GO:0000049(tRNA binding);GO:0000166(nucleotide binding);GO:0004812(aminoacyl-tRNA ligase activity);GO:0004826(phenylalanine-tRNA ligase activity);GO:0005524(ATP binding);GO:0005737(cytoplasm);GO:0005829(cytosol);GO:0006412(translation);GO:0006432(phenylalanyl-tRNA aminoacylation);GO:0009328(phenylalanine-tRNA ligase complex);GO:0016874(ligase activity);GO:0043039(tRNA aminoacylation);GO:0051290(p…	00970(Aminoacyl-tRNA biosynthesis)	K01889	EC:6.1.1.20
1	ENSDARG00000092731	mhc1uka	2.20592	1.74346	0.339432	0.000170776	1	major histocompatibility complex class I UKA [Source:ZFIN;Acc:ZDB-GENE-060825-152]	GO:0005615(extracellular space);GO:0005886(plasma membrane);GO:0006955(immune response);GO:0009897(external side of plasma membrane);GO:0016020(membrane);GO:0016021(integral component of membrane)	NA	NA	NA
1	ENSDARG00000098654	FQ976914.1	0.779346	0.641724	0.280309	0.000175459	1	raftlin-like [Source:NCBI gene;Acc:101885083]	NA	NA	NA	NA
1	ENSDARG00000090882	si:rp71-36a1.5.1	0.902752	0.730547	0.305354	0.000180581	1	si:rp71-36a1.5 [Source:ZFIN;Acc:ZDB-GENE-091204-428]	GO:0016020(membrane);GO:0016021(integral component of membrane)	NA	NA	NA
1	ENSDARG00000053131	irak3	1.65266	1.29686	0.349763	0.000206072	1	interleukin-1 receptor-associated kinase 3 [Source:ZFIN;Acc:ZDB-GENE-060503-710]	GO:0002755(MyD88-dependent toll-like receptor signaling pathway);GO:0004672(protein kinase activity);GO:0004674(protein serine/threonine kinase activity);GO:0005515(protein binding);GO:0005524(ATP binding);GO:0005634(nucleus);GO:0005737(cytoplasm);GO:0005886(plasma membrane);GO:0006468(protein phosphorylation);GO:0007165(signal transduction);GO:0016020(membrane);GO:0016021(integral component of m…	NA	K04732	EC:2.7.11.1
1	ENSDARG00000051886	ankrd11	3.04876	2.41492	0.336248	0.000284371	1	ankyrin repeat domain 11 [Source:ZFIN;Acc:ZDB-GENE-030131-3932]	GO:0005515(protein binding);GO:0005634(nucleus)	NA	K21436	NA
1	ENSDARG00000039243	zgc:152791	0.784114	0.593217	0.402505	0.000288817	1	zgc:152791 [Source:ZFIN;Acc:ZDB-GENE-060901-4]	GO:0003674(molecular_function);GO:0005739(mitochondrion);GO:0008150(biological_process);GO:0016020(membrane);GO:0016021(integral component of membrane)	NA	NA	NA
1	ENSDARG00000020759	elf1	4.40542	3.58363	0.297858	0.000291533	1	E74-like ETS transcription factor 1 [Source:ZFIN;Acc:ZDB-GENE-980526-335]	GO:0000981(DNA-binding transcription factor activity, RNA polymerase II-specific);GO:0001787(natural killer cell proliferation);GO:0001866(NK T cell proliferation);GO:0003677(DNA binding);GO:0003700(DNA-binding transcription factor activity);GO:0005634(nucleus);GO:0006355(regulation of transcription, DNA-templated);GO:0006357(regulation of transcription by RNA polymerase II);GO:0030154(cell diffe…	NA	K09428	NA
1	ENSDARG00000052515	calcoco2	2.32671	1.87101	0.314474	0.000294349	1	calcium binding and coiled-coil domain 2 [Source:ZFIN;Acc:ZDB-GENE-050522-346]	NA	04137(Mitophagy - animal)	K21348	NA
1	ENSDARG00000016188	SBNO2	2.27403	1.89608	0.262231	0.00031318	1	si:ch73-63e15.2 [Source:ZFIN;Acc:ZDB-GENE-091204-463]	GO:0005634(nucleus);GO:0006355(regulation of transcription, DNA-templated);GO:0050727(regulation of inflammatory response)	NA	NA	NA
1	ENSDARG00000098312	scarb2a	2.09354	1.64725	0.345881	0.00033986	1	scavenger receptor class B, member 2a [Source:ZFIN;Acc:ZDB-GENE-020419-29]	GO:0005044(scavenger receptor activity);GO:0005764(lysosome);GO:0006898(receptor-mediated endocytosis);GO:0016020(membrane);GO:0016021(integral component of membrane);GO:0030903(notochord development)	04142(Lysosome)	K12384	NA
1	ENSDARG00000092115	eif4a1a	5.4214	4.37422	0.309638	0.00040857	1	eukaryotic translation initiation factor 4A1A [Source:ZFIN;Acc:ZDB-GENE-031030-2]	GO:0003676(nucleic acid binding);GO:0003743(translation initiation factor activity);GO:0004004(ATP-dependent RNA helicase activity);GO:0005524(ATP binding);GO:0006413(translational initiation)	03013(RNA transport)	K03257	NA
1	ENSDARG00000077726	nocta	1.91264	1.56907	0.285658	0.000418825	1	nocturnin a [Source:ZFIN;Acc:ZDB-GENE-050208-306]	GO:0004535(poly(A)-specific ribonuclease activity);GO:0005575(cellular_component);GO:0007623(circadian rhythm);GO:0032922(circadian regulation of gene expression);GO:0090503(RNA phosphodiester bond hydrolysis, exonucleolytic)	NA	K18764	EC:3.1.13.4
1	ENSDARG00000017757	pik3cg	1.15658	0.940215	0.298802	0.00042484	1	phosphatidylinositol-4,5-bisphosphate 3-kinase, catalytic subunit gamma [Source:ZFIN;Acc:ZDB-GENE-040426-2532]	GO:0000166(nucleotide binding);GO:0005524(ATP binding);GO:0005737(cytoplasm);GO:0005886(plasma membrane);GO:0005942(phosphatidylinositol 3-kinase complex);GO:0006468(protein phosphorylation);GO:0014065(phosphatidylinositol 3-kinase signaling);GO:0016020(membrane);GO:0016301(kinase activity);GO:0016303(1-phosphatidylinositol-3-kinase activity);GO:0016310(phosphorylation);GO:0016477(cell migration)…	00562(Inositol phosphate metabolism);04261(Adrenergic signaling in cardiomyocytes);04371(Apelin signaling pathway)	K21289	EC:2.7.1.153
1	ENSDARG00000053047	eif2s2	1.88222	1.55354	0.276875	0.000440297	1	eukaryotic translation initiation factor 2, subunit 2 beta [Source:ZFIN;Acc:ZDB-GENE-030131-3085]	GO:0003743(translation initiation factor activity);GO:0006413(translational initiation)	03013(RNA transport)	K03238	NA
1	ENSDARG00000018898	zfand5a	2.43395	1.93204	0.333177	0.000462099	1	zinc finger, AN1-type domain 5a [Source:ZFIN;Acc:ZDB-GENE-040426-1979]	GO:0003677(DNA binding);GO:0008270(zinc ion binding);GO:0046872(metal ion binding)	NA	NA	NA
1	ENSDARG00000031768	roraa	2.12832	1.67632	0.344415	0.000521807	1	RAR-related orphan receptor A, paralog a [Source:ZFIN;Acc:ZDB-GENE-060306-2]	GO:0003677(DNA binding);GO:0003700(DNA-binding transcription factor activity);GO:0003707(steroid hormone receptor activity);GO:0004879(nuclear receptor activity);GO:0005634(nucleus);GO:0006355(regulation of transcription, DNA-templated);GO:0007275(multicellular organism development);GO:0008270(zinc ion binding);GO:0010468(regulation of gene expression);GO:0010628(positive regulation of gene expre…	NA	K08532	NA
1	ENSDARG00000075211	chd7	1.77063	1.42171	0.316637	0.000525856	1	chromodomain helicase DNA binding protein 7 [Source:ZFIN;Acc:ZDB-GENE-070912-179]	GO:0001755(neural crest cell migration);GO:0001756(somitogenesis);GO:0001947(heart looping);GO:0002244(hematopoietic progenitor cell differentiation);GO:0005515(protein binding);GO:0005524(ATP binding);GO:0005634(nucleus);GO:0007368(determination of left/right symmetry);GO:0007507(heart development);GO:0009303(rRNA transcription);GO:0014029(neural crest formation);GO:0016817(hydrolase activity, a…	NA	K14437	EC:3.6.4.12
1	ENSDARG00000013360	sh3gl3a	2.30295	1.77658	0.374385	0.000580715	1	SH3-domain GRB2-like 3a [Source:ZFIN;Acc:ZDB-GENE-070112-242]	GO:0005515(protein binding);GO:0005737(cytoplasm);GO:0006897(endocytosis)	04144(Endocytosis)	K11247	NA
1	ENSDARG00000059900	tbc1d9	0.514046	0.42173	0.285576	0.000746107	1	TBC1 domain family, member 9 (with GRAM domain) [Source:ZFIN;Acc:ZDB-GENE-060810-33]	GO:0005096(GTPase activator activity);GO:0005509(calcium ion binding);GO:0005623(cell);GO:0006886(intracellular protein transport);GO:0017137(Rab GTPase binding);GO:0090630(activation of GTPase activity)	NA	K19951	NA
1	ENSDARG00000088741	BX322530.1	0.761255	0.605985	0.329097	0.000754019	1	ash1 (absent, small, or homeotic)-like (Drosophila) pseudogene [Source:NCBI gene;Acc:100537860]	NA	NA	NA	NA
1	ENSDARG00000055162	zhx2a	0.744129	0.593938	0.325241	0.000858609	1	zinc fingers and homeoboxes 2a [Source:ZFIN;Acc:ZDB-GENE-031107-2]	GO:0000122(negative regulation of transcription by RNA polymerase II);GO:0003676(nucleic acid binding);GO:0003677(DNA binding);GO:0003700(DNA-binding transcription factor activity);GO:0003714(transcription corepressor activity);GO:0005634(nucleus)	NA	NA	NA
1	ENSDARG00000079994	akap13	3.64309	3.01706	0.272021	0.00093368	1	A-kinase anchoring protein 13 [Source:ZFIN;Acc:ZDB-GENE-030131-6253]	GO:0005089(Rho guanyl-nucleotide exchange factor activity);GO:0035023(regulation of Rho protein signal transduction);GO:0035556(intracellular signal transduction);GO:0046872(metal ion binding)	NA	K16529	NA
1	ENSDARG00000077130	bcl10	1.26223	1.05374	0.26045	0.000974465	1	BCL10, immune signaling adaptor [Source:ZFIN;Acc:ZDB-GENE-100219-2]	GO:0005737(cytoplasm);GO:0006915(apoptotic process);GO:0032449(CBM complex);GO:0042981(regulation of apoptotic process);GO:0051092(positive regulation of NF-kappaB transcription factor activity)	04625(C-type lectin receptor signaling pathway)	K07368	NA
1	ENSDARG00000090337	pprc1	0.839941	0.687559	0.288804	0.00111044	1	peroxisome proliferator-activated receptor gamma, coactivator-related 1 [Source:ZFIN;Acc:ZDB-GENE-030131-9858]	GO:0003676(nucleic acid binding);GO:0003712(transcription coregulator activity);GO:0003723(RNA binding);GO:0005634(nucleus);GO:0008134(transcription factor binding);GO:0030374(nuclear receptor transcription coactivator activity);GO:0045944(positive regulation of transcription by RNA polymerase II);GO:0051091(positive regulation of DNA-binding transcription factor activity)	NA	K17963	NA
1	ENSDARG00000040526	s1pr5a	0.455876	0.368859	0.30557	0.00118305	1	sphingosine-1-phosphate receptor 5a [Source:ZFIN;Acc:ZDB-GENE-041114-188]	GO:0003376(sphingosine-1-phosphate receptor signaling pathway);GO:0004930(G protein-coupled receptor activity);GO:0007165(signal transduction);GO:0007186(G protein-coupled receptor signaling pathway);GO:0016020(membrane);GO:0016021(integral component of membrane);GO:0038036(sphingosine-1-phosphate receptor activity)	04080(Neuroactive ligand-receptor interaction)	K04295	NA
1	ENSDARG00000022213	uck2b	0.660157	0.543161	0.281431	0.00121439	1	uridine-cytidine kinase 2b [Source:ZFIN;Acc:ZDB-GENE-030131-5265]	GO:0000166(nucleotide binding);GO:0004849(uridine kinase activity);GO:0005524(ATP binding);GO:0005829(cytosol);GO:0006238(CMP salvage);GO:0016301(kinase activity);GO:0016310(phosphorylation);GO:0016740(transferase activity);GO:0019206(nucleoside kinase activity);GO:0044206(UMP salvage);GO:0044211(CTP salvage)	00240(Pyrimidine metabolism);00983(Drug metabolism - other enzymes)	K00876	EC:2.7.1.48
1	ENSDARG00000060679	kdm1a	1.00289	0.822186	0.286631	0.00124942	1	lysine (K)-specific demethylase 1a [Source:ZFIN;Acc:ZDB-GENE-030131-7828]	GO:0000122(negative regulation of transcription by RNA polymerase II);GO:0000790(nuclear chromatin);GO:0003677(DNA binding);GO:0003682(chromatin binding);GO:0005515(protein binding);GO:0005634(nucleus);GO:0006325(chromatin organization);GO:0006355(regulation of transcription, DNA-templated);GO:0007399(nervous system development);GO:0008134(transcription factor binding);GO:0016491(oxidoreductase a…	NA	K11450	EC:1.-.-.-
1	ENSDARG00000021059	alas1	2.78174	2.30496	0.271245	0.0012919	1	aminolevulinate, delta-, synthase 1 [Source:ZFIN;Acc:ZDB-GENE-001229-2]	GO:0003824(catalytic activity);GO:0003870(5-aminolevulinate synthase activity);GO:0005739(mitochondrion);GO:0005759(mitochondrial matrix);GO:0006778(porphyrin-containing compound metabolic process);GO:0006782(protoporphyrinogen IX biosynthetic process);GO:0006783(heme biosynthetic process);GO:0009058(biosynthetic process);GO:0016740(transferase activity);GO:0016746(transferase activity, transferr…	00260(Glycine, serine and threonine metabolism);00860(Porphyrin and chlorophyll metabolism)	K00643	EC:2.3.1.37
1	ENSDARG00000069074	cry3a	1.23486	0.964579	0.356376	0.00147047	1	cryptochrome circadian regulator 3a [Source:ZFIN;Acc:ZDB-GENE-010426-4]	GO:0009266(response to temperature stimulus);GO:0009416(response to light stimulus);GO:0045892(negative regulation of transcription, DNA-templated)	NA	K02295	NA
1	ENSDARG00000035909	mfsd2ab	0.540044	0.440938	0.2925	0.0016397	1	major facilitator superfamily domain containing 2ab [Source:ZFIN;Acc:ZDB-GENE-040801-89]	GO:0005215(transporter activity);GO:0005548(phospholipid transporter activity);GO:0005783(endoplasmic reticulum);GO:0005789(endoplasmic reticulum membrane);GO:0005886(plasma membrane);GO:0005887(integral component of plasma membrane);GO:0006869(lipid transport);GO:0008643(carbohydrate transport);GO:0015293(symporter activity);GO:0015908(fatty acid transport);GO:0016020(membrane);GO:0016021(integr…	NA	NA	NA
1	ENSDARG00000003820	nr1d2a	1.33802	1.07893	0.310506	0.00181247	1	nuclear receptor subfamily 1, group D, member 2a [Source:ZFIN;Acc:ZDB-GENE-040504-1]	GO:0003677(DNA binding);GO:0003700(DNA-binding transcription factor activity);GO:0003707(steroid hormone receptor activity);GO:0004879(nuclear receptor activity);GO:0005634(nucleus);GO:0006355(regulation of transcription, DNA-templated);GO:0008270(zinc ion binding);GO:0030522(intracellular receptor signaling pathway);GO:0032922(circadian regulation of gene expression);GO:0043401(steroid hormone m…	NA	NA	NA
1	ENSDARG00000043304	nop2	0.800051	0.654441	0.289828	0.00189081	1	NOP2 nucleolar protein homolog (yeast) [Source:ZFIN;Acc:ZDB-GENE-050309-7]	GO:0003723(RNA binding);GO:0005730(nucleolus);GO:0006364(rRNA processing);GO:0008168(methyltransferase activity);GO:0008757(S-adenosylmethionine-dependent methyltransferase activity);GO:0009383(rRNA (cytosine-C5-)-methyltransferase activity);GO:0016740(transferase activity);GO:0032259(methylation);GO:0070475(rRNA base methylation)	NA	K14835	EC:2.1.1.310
1	ENSDARG00000096527	BX548015.2	0.816289	0.679614	0.264363	0.00195486	1	NA	NA	NA	NA	NA
1	ENSDARG00000021556	ubl3b	0.574496	0.477463	0.266908	0.00200784	1	ubiquitin-like 3b [Source:ZFIN;Acc:ZDB-GENE-040630-4]	GO:0005515(protein binding);GO:0005886(plasma membrane);GO:0016020(membrane)	NA	NA	NA
1	ENSDARG00000086173	relb	4.5187	3.6171	0.321076	0.00221013	1	v-rel avian reticuloendotheliosis viral oncogene homolog B [Source:ZFIN;Acc:ZDB-GENE-030131-9531]	GO:0000122(negative regulation of transcription by RNA polymerase II);GO:0000977(RNA polymerase II regulatory region sequence-specific DNA binding);GO:0000981(DNA-binding transcription factor activity, RNA polymerase II-specific);GO:0003677(DNA binding);GO:0003682(chromatin binding);GO:0003700(DNA-binding transcription factor activity);GO:0005634(nucleus);GO:0005654(nucleoplasm);GO:0005737(cytopl…	04010(MAPK signaling pathway);04625(C-type lectin receptor signaling pathway)	K09253	NA
1	ENSDARG00000104708	ddx24	0.79949	0.656097	0.285171	0.00267622	1	DEAD (Asp-Glu-Ala-Asp) box helicase 24 [Source:ZFIN;Acc:ZDB-GENE-100716-4]	GO:0000166(nucleotide binding);GO:0003676(nucleic acid binding);GO:0004386(helicase activity);GO:0005524(ATP binding);GO:0016787(hydrolase activity)	NA	K14805	EC:3.6.4.13
1	ENSDARG00000052348	smarca5	0.868811	0.722036	0.266972	0.00272575	1	SWI/SNF related, matrix associated, actin dependent regulator of chromatin, subfamily a, member 5 [Source:ZFIN;Acc:ZDB-GENE-021125-1]	GO:0000166(nucleotide binding);GO:0003231(cardiac ventricle development);GO:0003676(nucleic acid binding);GO:0003677(DNA binding);GO:0004386(helicase activity);GO:0005524(ATP binding);GO:0005634(nucleus);GO:0006325(chromatin organization);GO:0006338(chromatin remodeling);GO:0016589(NURF complex);GO:0016787(hydrolase activity);GO:0016818(hydrolase activity, acting on acid anhydrides, in phosphorus…	NA	K11654	EC:3.6.4.-
1	ENSDARG00000016548	eif5b	1.96894	1.58316	0.314614	0.00380706	1	eukaryotic translation initiation factor 5B [Source:ZFIN;Acc:ZDB-GENE-050208-20]	GO:0003743(translation initiation factor activity);GO:0003924(GTPase activity);GO:0005525(GTP binding);GO:0006413(translational initiation)	03013(RNA transport)	K03243	NA
1	ENSDARG00000112234	endouc	0.524436	0.433417	0.27501	0.00453984	1	endonuclease, polyU-specific C [Source:ZFIN;Acc:ZDB-GENE-060503-141]	GO:0003723(RNA binding);GO:0004518(nuclease activity);GO:0004519(endonuclease activity);GO:0004521(endoribonuclease activity);GO:0005576(extracellular region);GO:0016787(hydrolase activity);GO:0046872(metal ion binding);GO:0090305(nucleic acid phosphodiester bond hydrolysis);GO:0090502(RNA phosphodiester bond hydrolysis, endonucleolytic)	NA	K14648	EC:3.1.-.-
1	ENSDARG00000096508	BX322618.1	8.01045	6.31777	0.342467	0.00461228	1	NA	NA	NA	NA	NA
1	ENSDARG00000056619	arhgap42a	0.502521	0.418432	0.26419	0.00467417	1	Rho GTPase activating protein 42a [Source:ZFIN;Acc:ZDB-GENE-030131-8077]	GO:0005096(GTPase activator activity);GO:0005515(protein binding);GO:0007165(signal transduction);GO:0043547(positive regulation of GTPase activity)	NA	K20651	NA
1	ENSDARG00000069295	bcl6ab	0.819324	0.675121	0.279288	0.0074144	1	BCL6A, transcription repressor b [Source:ZFIN;Acc:ZDB-GENE-030131-7523]	GO:0000122(negative regulation of transcription by RNA polymerase II);GO:0000977(RNA polymerase II regulatory region sequence-specific DNA binding);GO:0001227(DNA-binding transcription repressor activity, RNA polymerase II-specific);GO:0003676(nucleic acid binding);GO:0003677(DNA binding);GO:0005515(protein binding);GO:0005634(nucleus)	NA	NA	NA
1	ENSDARG00000035133	pho	2.6102	2.07473	0.331233	0.00779505	1	phoenix [Source:ZFIN;Acc:ZDB-GENE-030131-5935]	GO:0070658(neuromast hair cell differentiation involved in neuromast regeneration)	NA	NA	NA
2	ENSDARG00000095693	CT573231.1	15.8077	1.28929	3.61599	2.26454e-116	5.52343e-112	NA	NA	NA	NA	NA
2	ENSDARG00000093170	mef2b	3.70087	0.804716	2.20131	3.96907e-88	9.68095e-84	myocyte enhancer factor 2b [Source:ZFIN;Acc:ZDB-GENE-050208-357]	GO:0000790(nuclear chromatin);GO:0000977(RNA polymerase II regulatory region sequence-specific DNA binding);GO:0000978(RNA polymerase II proximal promoter sequence-specific DNA binding);GO:0003677(DNA binding);GO:0005634(nucleus);GO:0042826(histone deacetylase binding);GO:0045944(positive regulation of transcription by RNA polymerase II);GO:0046983(protein dimerization activity)	04371(Apelin signaling pathway)	K09261	NA
2	ENSDARG00000058853	sash1b	3.12728	0.807238	1.95384	6.07616e-75	1.48204e-70	SAM and SH3 domain containing 1b [Source:ZFIN;Acc:ZDB-GENE-110228-1]	GO:0005515(protein binding)	NA	NA	NA
2	ENSDARG00000071339	borcs8	3.07061	0.786502	1.965	6.86939e-74	1.67551e-69	BLOC-1 related complex subunit 8 [Source:ZFIN;Acc:ZDB-GENE-050208-757]	GO:0005764(lysosome);GO:0005765(lysosomal membrane);GO:0016020(membrane);GO:0099078(BORC complex)	NA	K20822	NA
2	ENSDARG00000042722	blnk	3.76083	0.827914	2.1835	1.69942e-72	4.14505e-68	B cell linker [Source:ZFIN;Acc:ZDB-GENE-040702-4]	GO:0007169(transmembrane receptor protein tyrosine kinase signaling pathway);GO:0035556(intracellular signal transduction)	NA	NA	NA
2	ENSDARG00000009336	aif1l	6.86508	1.2597	2.44619	3.88395e-67	9.47333e-63	allograft inflammatory factor 1-like [Source:ZFIN;Acc:ZDB-GENE-030131-9646]	GO:0005509(calcium ion binding);GO:0005884(actin filament);GO:0032587(ruffle membrane);GO:0042995(cell projection);GO:0051015(actin filament binding);GO:0051017(actin filament bundle assembly);GO:0097178(ruffle assembly)	NA	K18617	NA
2	ENSDARG00000077777	tmsb4x	144.146	57.1608	1.33443	2.6656e-65	6.50166e-61	thymosin beta 4 X-linked [Source:ZFIN;Acc:ZDB-GENE-030131-8304]	GO:0001947(heart looping);GO:0003181(atrioventricular valve morphogenesis);GO:0003779(actin binding);GO:0003785(actin monomer binding);GO:0005737(cytoplasm);GO:0005856(cytoskeleton);GO:0007015(actin filament organization);GO:0030334(regulation of cell migration);GO:0036302(atrioventricular canal development);GO:0042989(sequestering of actin monomers)	04810(Regulation of actin cytoskeleton)	K05764	NA
2	ENSDARG00000027063	arpc1b	19.4883	6.68015	1.54465	6.6459e-61	1.621e-56	actin related protein 2/3 complex, subunit 1B [Source:ZFIN;Acc:ZDB-GENE-030131-7414]	GO:0002574(thrombocyte differentiation);GO:0003779(actin binding);GO:0005515(protein binding);GO:0005737(cytoplasm);GO:0005856(cytoskeleton);GO:0005885(Arp2/3 protein complex);GO:0015629(actin cytoskeleton);GO:0030217(T cell differentiation);GO:0030833(regulation of actin filament polymerization);GO:0034314(Arp2/3 complex-mediated actin nucleation);GO:0051015(actin filament binding)	04144(Endocytosis);04810(Regulation of actin cytoskeleton);05132(Salmonella infection)	K05757	NA
2	ENSDARG00000062855	plekhg7	3.25945	0.865068	1.91374	1.12491e-56	2.74378e-52	pleckstrin homology domain containing, family G (with RhoGef domain) member 7 [Source:ZFIN;Acc:ZDB-GENE-070410-15]	GO:0005089(Rho guanyl-nucleotide exchange factor activity);GO:0035023(regulation of Rho protein signal transduction)	NA	NA	NA
2	ENSDARG00000037870	actb2	158.579	62.4611	1.34417	3.14392e-53	7.66834e-49	actin, beta 2 [Source:ZFIN;Acc:ZDB-GENE-000329-3]	GO:0000166(nucleotide binding);GO:0005524(ATP binding);GO:0005634(nucleus);GO:0005737(cytoplasm);GO:0005856(cytoskeleton);GO:0005886(plasma membrane);GO:0005925(focal adhesion);GO:0097433(dense body)	04145(Phagosome);04210(Apoptosis);04510(Focal adhesion);04520(Adherens junction);04530(Tight junction);04810(Regulation of actin cytoskeleton);05132(Salmonella infection)	K05692	NA
2	ENSDARG00000103773	CR457444.5	2.44069	0.772845	1.65904	2.01574e-47	4.9166e-43	NA	NA	NA	NA	NA
2	ENSDARG00000102889	sept15	1.95648	0.686418	1.5111	2.17628e-46	5.30817e-42	septin 15 [Source:ZFIN;Acc:ZDB-GENE-061103-265]	GO:0000166(nucleotide binding);GO:0003924(GTPase activity);GO:0005525(GTP binding);GO:0005940(septin ring);GO:0015630(microtubule cytoskeleton);GO:0031018(endocrine pancreas development);GO:0031105(septin complex);GO:0032947(protein-containing complex scaffold activity);GO:0042742(defense response to bacterium);GO:0055003(cardiac myofibril assembly);GO:0060048(cardiac muscle contraction);GO:00602…	NA	K16944	NA
2	ENSDARG00000099401	ccl33.3	24.5466	12.2108	1.00736	9.22051e-46	2.24897e-41	chemokine (C-C motif) ligand 33, duplicate 3 [Source:ZFIN;Acc:ZDB-GENE-081104-131]	NA	NA	NA	NA
2	ENSDARG00000021811	calm1a	9.1105	2.56749	1.82717	1.2004e-45	2.9279e-41	calmodulin 1a [Source:ZFIN;Acc:ZDB-GENE-030131-8308]	GO:0005509(calcium ion binding);GO:0019722(calcium-mediated signaling);GO:0046872(metal ion binding)	04020(Calcium signaling pathway);04070(Phosphatidylinositol signaling system);04114(Oocyte meiosis);04218(Cellular senescence);04261(Adrenergic signaling in cardiomyocytes);04270(Vascular smooth muscle contraction);04371(Apelin signaling pathway);04625(C-type lectin receptor signaling pathway);04744(Phototransduction);04910(Insulin signaling pathway);04912(GnRH signaling pathway);04916(Melanogene…	K02183	NA
2	ENSDARG00000068233	zgc:64051	15.0717	6.07224	1.31154	3.27274e-45	7.98254e-41	zgc:64051 [Source:ZFIN;Acc:ZDB-GENE-040426-1349]	GO:0003674(molecular_function);GO:0005887(integral component of plasma membrane);GO:0007166(cell surface receptor signaling pathway);GO:0016020(membrane);GO:0016021(integral component of membrane)	NA	K06489	NA
2	ENSDARG00000088091	pfn1	120.368	51.7556	1.21766	3.37979e-45	8.24364e-41	profilin 1 [Source:ZFIN;Acc:ZDB-GENE-031002-33]	GO:0003779(actin binding);GO:0005737(cytoplasm);GO:0030036(actin cytoskeleton organization);GO:0030833(regulation of actin filament polymerization);GO:0032233(positive regulation of actin filament bundle assembly);GO:0055113(epiboly involved in gastrulation with mouth forming second);GO:0060027(convergent extension involved in gastrulation)	NA	NA	NA
2	ENSDARG00000097137	CR753876.1	47.629	13.3778	1.832	6.8415e-45	1.66871e-40	NA	NA	NA	NA	NA
2	ENSDARG00000035907	fam49al	1.54654	0.625523	1.30591	3.87265e-44	9.44578e-40	family with sequence similarity 49 member A, like [Source:ZFIN;Acc:ZDB-GENE-040801-125]	GO:0005575(cellular_component)	NA	NA	NA
2	ENSDARG00000060977	zgc:153018	5.88504	1.70818	1.78459	1.27942e-43	3.12063e-39	zgc:153018 [Source:ZFIN;Acc:ZDB-GENE-060929-752]	GO:0003674(molecular_function);GO:0008150(biological_process);GO:0016020(membrane);GO:0016021(integral component of membrane)	NA	NA	NA
2	ENSDARG00000003795	idh2	5.4051	2.1471	1.33193	4.44862e-38	1.08506e-33	isocitrate dehydrogenase 2 (NADP+), mitochondrial [Source:ZFIN;Acc:ZDB-GENE-031118-95]	GO:0000287(magnesium ion binding);GO:0004450(isocitrate dehydrogenase (NADP+) activity);GO:0006102(isocitrate metabolic process);GO:0016616(oxidoreductase activity, acting on the CH-OH group of donors, NAD or NADP as acceptor);GO:0051287(NAD binding);GO:0055114(oxidation-reduction process)	00020(Citrate cycle (TCA cycle));00480(Glutathione metabolism);04146(Peroxisome)	K00031	EC:1.1.1.42
2	ENSDARG00000056525	bcar1	1.4657	0.624682	1.2304	9.48785e-38	2.31418e-33	BCAR1, Cas family scaffold protein [Source:ZFIN;Acc:ZDB-GENE-030131-2774]	GO:0005515(protein binding);GO:0005737(cytoplasm);GO:0005886(plasma membrane);GO:0007165(signal transduction);GO:0016477(cell migration);GO:0090527(actin filament reorganization)	04510(Focal adhesion);04810(Regulation of actin cytoskeleton)	K05726	NA
2	ENSDARG00000057286	swap70b	1.13621	0.542363	1.0669	1.13311e-37	2.76377e-33	switching B cell complex subunit SWAP70b [Source:ZFIN;Acc:ZDB-GENE-030131-3587]	GO:0005509(calcium ion binding);GO:0005634(nucleus);GO:0005737(cytoplasm);GO:0007096(regulation of exit from mitosis);GO:0048714(positive regulation of oligodendrocyte differentiation);GO:0060026(convergent extension);GO:0060027(convergent extension involved in gastrulation);GO:0060028(convergent extension involved in axis elongation)	NA	K20072	NA
2	ENSDARG00000103959	pak1	1.57339	0.659448	1.25454	6.62724e-37	1.61645e-32	p21 protein (Cdc42/Rac)-activated kinase 1 [Source:ZFIN;Acc:ZDB-GENE-030826-29]	GO:0000166(nucleotide binding);GO:0001755(neural crest cell migration);GO:0001947(heart looping);GO:0003232(bulbus arteriosus development);GO:0004672(protein kinase activity);GO:0004674(protein serine/threonine kinase activity);GO:0005515(protein binding);GO:0005524(ATP binding);GO:0005737(cytoplasm);GO:0006468(protein phosphorylation);GO:0007507(heart development);GO:0009950(dorsal/ventral axis …	04010(MAPK signaling pathway);04012(ErbB signaling pathway);04510(Focal adhesion);04625(C-type lectin receptor signaling pathway);04810(Regulation of actin cytoskeleton)	K04409	EC:2.7.11.1
2	ENSDARG00000036215	lcp2b	3.27509	1.109	1.56227	4.5828e-36	1.11779e-31	lymphocyte cytosolic protein 2b [Source:ZFIN;Acc:ZDB-GENE-081107-21]	GO:0007169(transmembrane receptor protein tyrosine kinase signaling pathway);GO:0035556(intracellular signal transduction)	NA	NA	NA
2	ENSDARG00000077499	plekho1b	2.2245	0.842285	1.4011	4.37554e-33	1.06724e-28	pleckstrin homology domain containing, family O member 1b [Source:ZFIN;Acc:ZDB-GENE-100609-2]	GO:1901739(regulation of myoblast fusion)	NA	NA	NA
2	ENSDARG00000019564	asap2b	1.11531	0.535225	1.05922	6.19651e-33	1.51139e-28	ArfGAP with SH3 domain, ankyrin repeat and PH domain 2b [Source:ZFIN;Acc:ZDB-GENE-030131-5060]	GO:0005096(GTPase activator activity);GO:0005515(protein binding);GO:0005575(cellular_component);GO:0043547(positive regulation of GTPase activity);GO:0046872(metal ion binding)	04144(Endocytosis)	K12488	NA
2	ENSDARG00000004378	yrk	2.07743	0.854457	1.28172	9.01665e-33	2.19925e-28	Yes-related kinase [Source:ZFIN;Acc:ZDB-GENE-030131-9517]	GO:0000166(nucleotide binding);GO:0004672(protein kinase activity);GO:0004713(protein tyrosine kinase activity);GO:0004715(non-membrane spanning protein tyrosine kinase activity);GO:0005102(signaling receptor binding);GO:0005515(protein binding);GO:0005524(ATP binding);GO:0006468(protein phosphorylation);GO:0007169(transmembrane receptor protein tyrosine kinase signaling pathway);GO:0016301(kinas…	NA	K17511	EC:2.7.10.2
2	ENSDARG00000001950	ak1	1.869	0.775978	1.26818	1.48824e-32	3.62997e-28	adenylate kinase 1 [Source:ZFIN;Acc:ZDB-GENE-040822-37]	GO:0000166(nucleotide binding);GO:0004017(adenylate kinase activity);GO:0004550(nucleoside diphosphate kinase activity);GO:0005524(ATP binding);GO:0005737(cytoplasm);GO:0006139(nucleobase-containing compound metabolic process);GO:0006165(nucleoside diphosphate phosphorylation);GO:0006172(ADP biosynthetic process);GO:0009142(nucleoside triphosphate biosynthetic process);GO:0016301(kinase activity)…	00230(Purine metabolism);00730(Thiamine metabolism)	K00939	EC:2.7.4.3
2	ENSDARG00000016774	plekho2	2.92001	1.07794	1.4377	2.05597e-32	5.01472e-28	pleckstrin homology domain containing, family O member 2 [Source:ZFIN;Acc:ZDB-GENE-120406-4]	NA	NA	NA	NA
2	ENSDARG00000019274	rasd1	2.24371	0.69558	1.6896	7.6233e-32	1.8594e-27	RAS, dexamethasone-induced 1 [Source:ZFIN;Acc:ZDB-GENE-040426-1473]	GO:0000166(nucleotide binding);GO:0003924(GTPase activity);GO:0005525(GTP binding);GO:0007165(signal transduction);GO:0016020(membrane)	NA	K07843	NA
2	ENSDARG00000074806	afap1l2	2.74409	1.07925	1.3463	1.41756e-31	3.45757e-27	actin filament associated protein 1-like 2 [Source:ZFIN;Acc:ZDB-GENE-100318-1]	GO:0005737(cytoplasm);GO:0009966(regulation of signal transduction);GO:0009967(positive regulation of signal transduction);GO:0035591(signaling adaptor activity)	NA	NA	NA
2	ENSDARG00000105109	FP102783.1	1.13681	0.532503	1.09412	1.48232e-31	3.61551e-27	NA	NA	NA	NA	NA
2	ENSDARG00000058348	scinlb	10.72	5.1058	1.0701	1.71002e-31	4.17092e-27	scinderin like b [Source:ZFIN;Acc:ZDB-GENE-040426-2068]	GO:0005575(cellular_component);GO:0008150(biological_process);GO:0051015(actin filament binding)	04810(Regulation of actin cytoskeleton)	K05768	NA
2	ENSDARG00000105263	ccl36.1	34.7534	11.3709	1.6118	1.51857e-30	3.70394e-26	chemokine (C-C motif) ligand 36, duplicate 1 [Source:ZFIN;Acc:ZDB-GENE-140718-2]	GO:0002548(monocyte chemotaxis);GO:0005125(cytokine activity);GO:0005576(extracellular region);GO:0005615(extracellular space);GO:0006935(chemotaxis);GO:0006954(inflammatory response);GO:0006955(immune response);GO:0007186(G protein-coupled receptor signaling pathway);GO:0008009(chemokine activity);GO:0010469(regulation of signaling receptor activity);GO:0030593(neutrophil chemotaxis);GO:0043547(…	NA	NA	NA
2	ENSDARG00000097767	BX000438.1	0.995606	0.503184	0.98449	1.9798e-29	4.82892e-25	NA	NA	NA	NA	NA
2	ENSDARG00000029150	hsp90ab1	76.7917	47.9578	0.679186	2.22826e-29	5.43495e-25	heat shock protein 90, alpha (cytosolic), class B member 1 [Source:ZFIN;Acc:ZDB-GENE-990415-95]	GO:0000166(nucleotide binding);GO:0001568(blood vessel development);GO:0005515(protein binding);GO:0005524(ATP binding);GO:0005576(extracellular region);GO:0005634(nucleus);GO:0005737(cytoplasm);GO:0005829(cytosol);GO:0005886(plasma membrane);GO:0006457(protein folding);GO:0007517(muscle organ development);GO:0009408(response to heat);GO:0009986(cell surface);GO:0019901(protein kinase binding);GO…	04141(Protein processing in endoplasmic reticulum);04217(Necroptosis);04621(NOD-like receptor signaling pathway);04914(Progesterone-mediated oocyte maturation)	K04079	NA
2	ENSDARG00000006308	ptpn18	1.0703	0.540525	0.985579	3.18531e-27	7.76928e-23	protein tyrosine phosphatase, non-receptor type 18 [Source:ZFIN;Acc:ZDB-GENE-050320-12]	GO:0004721(phosphoprotein phosphatase activity);GO:0004725(protein tyrosine phosphatase activity);GO:0006470(protein dephosphorylation);GO:0016311(dephosphorylation);GO:0016787(hydrolase activity);GO:0016791(phosphatase activity);GO:0035335(peptidyl-tyrosine dephosphorylation)	NA	K18024	EC:3.1.3.48
2	ENSDARG00000038882	smc4	2.09676	0.867284	1.27359	4.45837e-27	1.08744e-22	structural maintenance of chromosomes 4 [Source:ZFIN;Acc:ZDB-GENE-020419-21]	GO:0005515(protein binding);GO:0005524(ATP binding);GO:0005634(nucleus);GO:0005694(chromosome);GO:0051276(chromosome organization)	NA	K06675	NA
2	ENSDARG00000019113	mob3a	3.1847	1.51286	1.07388	1.11114e-25	2.71018e-21	MOB kinase activator 3A [Source:ZFIN;Acc:ZDB-GENE-030131-4091]	NA	NA	NA	NA
2	ENSDARG00000103994	ppiab	14.4156	7.73706	0.89777	3.89471e-25	9.4996e-21	peptidylprolyl isomerase Ab (cyclophilin A) [Source:ZFIN;Acc:ZDB-GENE-030131-7459]	GO:0000413(protein peptidyl-prolyl isomerization);GO:0001666(response to hypoxia);GO:0003755(peptidyl-prolyl cis-trans isomerase activity);GO:0005575(cellular_component);GO:0006457(protein folding);GO:0016018(cyclosporin A binding);GO:0016853(isomerase activity);GO:0042026(protein refolding);GO:0051082(unfolded protein binding)	04217(Necroptosis)	K03767	EC:5.2.1.8
2	ENSDARG00000117364	CU928222.3	1.04731	0.521299	1.0065	4.58907e-25	1.11932e-20	NA	NA	NA	NA	NA
2	ENSDARG00000099690	vaspa	4.73233	2.31732	1.03009	5.09488e-25	1.24269e-20	vasodilator stimulated phosphoprotein a [Source:ZFIN;Acc:ZDB-GENE-070424-68]	GO:0008154(actin polymerization or depolymerization)	04510(Focal adhesion);04530(Tight junction)	K06274	NA
2	ENSDARG00000044718	vav2	0.58712	0.377127	0.638608	1.43358e-24	3.49664e-20	vav 2 guanine nucleotide exchange factor [Source:ZFIN;Acc:ZDB-GENE-091204-420]	GO:0005085(guanyl-nucleotide exchange factor activity);GO:0005089(Rho guanyl-nucleotide exchange factor activity);GO:0005515(protein binding);GO:0035023(regulation of Rho protein signal transduction);GO:0035556(intracellular signal transduction);GO:0046872(metal ion binding)	04510(Focal adhesion);04810(Regulation of actin cytoskeleton)	K05730	NA
2	ENSDARG00000088219	zmp:0000000924	0.735263	0.430051	0.773751	2.0369e-23	4.96821e-19	zmp:0000000924 [Source:ZFIN;Acc:ZDB-GENE-130530-927]	GO:0016020(membrane);GO:0016021(integral component of membrane);GO:0030246(carbohydrate binding)	NA	NA	NA
2	ENSDARG00000078285	pik3ap1	1.53313	0.748184	1.03502	8.54286e-23	2.08369e-18	phosphoinositide-3-kinase adaptor protein 1 [Source:ZFIN;Acc:ZDB-GENE-090313-250]	NA	NA	NA	NA
2	ENSDARG00000098646	mthfd2	2.46157	1.03541	1.24937	1.65257e-22	4.03079e-18	methylenetetrahydrofolate dehydrogenase (NADP+ dependent) 2, methenyltetrahydrofolate cyclohydrolase [Source:ZFIN;Acc:ZDB-GENE-040704-20]	GO:0003824(catalytic activity);GO:0004477(methenyltetrahydrofolate cyclohydrolase activity);GO:0004487(methylenetetrahydrofolate dehydrogenase (NAD+) activity);GO:0004488(methylenetetrahydrofolate dehydrogenase (NADP+) activity);GO:0016787(hydrolase activity);GO:0035999(tetrahydrofolate interconversion);GO:0046653(tetrahydrofolate metabolic process);GO:0055114(oxidation-reduction process)	00670(One carbon pool by folate)	K13403	3.5.4.9;EC:1.5.1.15
2	ENSDARG00000032606	sept8a	1.68202	0.786369	1.09691	6.34821e-22	1.54839e-17	septin 8a [Source:ZFIN;Acc:ZDB-GENE-030131-309]	GO:0000166(nucleotide binding);GO:0005525(GTP binding)	NA	K16939	NA
2	ENSDARG00000031108	lrba	2.58759	1.21583	1.08966	7.02236e-22	1.71282e-17	LPS-responsive vesicle trafficking, beach and anchor containing [Source:ZFIN;Acc:ZDB-GENE-090311-19]	GO:0005515(protein binding)	NA	NA	NA
2	ENSDARG00000055759	efhd2	2.41957	1.13684	1.08972	7.741e-22	1.88811e-17	EF-hand domain family, member D2 [Source:ZFIN;Acc:ZDB-GENE-060531-152]	GO:0005509(calcium ion binding)	NA	NA	NA
2	ENSDARG00000090473	si:ch211-269k10.5	1.79361	0.878655	1.0295	8.97172e-22	2.18829e-17	si:ch211-269k10.5 [Source:ZFIN;Acc:ZDB-GENE-131121-638]	GO:0016020(membrane);GO:0016021(integral component of membrane)	NA	K22190	NA
2	ENSDARG00000003017	ube2al	6.63377	3.00341	1.14323	9.73844e-22	2.3753e-17	ubiquitin conjugating enzyme E2 A, like [Source:ZFIN;Acc:ZDB-GENE-030131-4195]	GO:0000166(nucleotide binding);GO:0000209(protein polyubiquitination);GO:0000790(nuclear chromatin);GO:0005524(ATP binding);GO:0006281(DNA repair);GO:0016740(transferase activity);GO:0033503(HULC complex);GO:0043161(proteasome-mediated ubiquitin-dependent protein catabolic process);GO:0061631(ubiquitin conjugating enzyme activity)	04120(Ubiquitin mediated proteolysis)	K10573	EC:2.3.2.23
2	ENSDARG00000012513	sdcbp2	10.0556	5.08035	0.984997	1.16913e-21	2.85163e-17	syndecan binding protein (syntenin) 2 [Source:ZFIN;Acc:ZDB-GENE-030131-3727]	GO:0001666(response to hypoxia);GO:0005515(protein binding);GO:0005737(cytoplasm);GO:0005886(plasma membrane);GO:0007268(chemical synaptic transmission);GO:0007416(synapse assembly);GO:0030036(actin cytoskeleton organization);GO:0035556(intracellular signal transduction);GO:0042246(tissue regeneration);GO:0043325(phosphatidylinositol-3,4-bisphosphate binding);GO:0045545(syndecan binding);GO:00551…	NA	K17254	NA
2	ENSDARG00000011333	arhgap33	0.762148	0.462166	0.721661	1.35842e-21	3.31332e-17	Rho GTPase activating protein 33 [Source:ZFIN;Acc:ZDB-GENE-121105-12]	GO:0005096(GTPase activator activity);GO:0005515(protein binding);GO:0007165(signal transduction);GO:0007264(small GTPase mediated signal transduction);GO:0015031(protein transport);GO:0035091(phosphatidylinositol binding);GO:0043547(positive regulation of GTPase activity)	NA	K20647	NA
2	ENSDARG00000102955	si:ch211-11c3.12	0.949957	0.515186	0.88277	2.81105e-21	6.85643e-17	si:ch211-11c3.12 [Source:ZFIN;Acc:ZDB-GENE-141216-180]	NA	NA	NA	NA
2	ENSDARG00000053858	crip1	6.29219	3.3091	0.927126	3.50253e-21	8.54301e-17	cysteine-rich protein 1 [Source:ZFIN;Acc:ZDB-GENE-041111-1]	GO:0003680(AT DNA binding);GO:0005737(cytoplasm);GO:0007507(heart development);GO:0008270(zinc ion binding);GO:0008301(DNA binding, bending);GO:0008630(intrinsic apoptotic signaling pathway in response to DNA damage);GO:0010043(response to zinc ion);GO:0042277(peptide binding);GO:0046872(metal ion binding);GO:0060047(heart contraction);GO:0071236(cellular response to antibiotic);GO:0071493(cellul…	NA	NA	NA
2	ENSDARG00000037746	actb1	23.2762	12.6508	0.879626	8.86294e-21	2.16176e-16	actin, beta 1 [Source:ZFIN;Acc:ZDB-GENE-000329-1]	GO:0000166(nucleotide binding);GO:0005524(ATP binding);GO:0005634(nucleus);GO:0005737(cytoplasm);GO:0005856(cytoskeleton);GO:0005886(plasma membrane);GO:0005925(focal adhesion);GO:0015629(actin cytoskeleton);GO:0097433(dense body)	04145(Phagosome);04210(Apoptosis);04510(Focal adhesion);04520(Adherens junction);04530(Tight junction);04810(Regulation of actin cytoskeleton);05132(Salmonella infection)	K05692	NA
2	ENSDARG00000096639	BX276101.1	0.511038	0.338679	0.593514	9.23476e-21	2.25245e-16	NA	NA	NA	NA	NA
2	ENSDARG00000045661	irf7	4.32026	2.03565	1.08563	1.11144e-20	2.71092e-16	interferon regulatory factor 7 [Source:ZFIN;Acc:ZDB-GENE-040426-1518]	GO:0000981(DNA-binding transcription factor activity, RNA polymerase II-specific);GO:0002376(immune system process);GO:0003700(DNA-binding transcription factor activity);GO:0005515(protein binding);GO:0005634(nucleus);GO:0006355(regulation of transcription, DNA-templated);GO:0006357(regulation of transcription by RNA polymerase II);GO:0009615(response to virus);GO:0030097(hemopoiesis);GO:0044212(…	04620(Toll-like receptor signaling pathway);04621(NOD-like receptor signaling pathway);04622(RIG-I-like receptor signaling pathway);04623(Cytosolic DNA-sensing pathway);05168(Herpes simplex virus 1 infection)	K09447	NA
2	ENSDARG00000013976	anxa13	0.54481	0.357171	0.609139	1.42329e-20	3.47156e-16	annexin A13 [Source:ZFIN;Acc:ZDB-GENE-010406-1]	GO:0001786(phosphatidylserine binding);GO:0005509(calcium ion binding);GO:0005544(calcium-dependent phospholipid binding);GO:0042998(positive regulation of Golgi to plasma membrane protein transport);GO:1901611(phosphatidylglycerol binding)	NA	K17099	NA
2	ENSDARG00000052157	il12rb2	0.898682	0.536167	0.745128	3.1253e-20	7.62293e-16	interleukin 12 receptor, beta 2a [Source:ZFIN;Acc:ZDB-GENE-080107-3]	GO:0004896(cytokine receptor activity);GO:0005515(protein binding);GO:0009897(external side of plasma membrane);GO:0016020(membrane);GO:0016021(integral component of membrane);GO:0019221(cytokine-mediated signaling pathway);GO:0019955(cytokine binding);GO:0043235(receptor complex)	04060(Cytokine-cytokine receptor interaction)	K05064	NA
2	ENSDARG00000040287	ywhabl	3.96316	2.1052	0.912694	3.13362e-20	7.64321e-16	tyrosine 3-monooxygenase/tryptophan 5-monooxygenase activation protein, beta polypeptide like [Source:ZFIN;Acc:ZDB-GENE-030131-448]	GO:0004497(monooxygenase activity);GO:0019904(protein domain specific binding);GO:0055114(oxidation-reduction process)	04110(Cell cycle);04114(Oocyte meiosis)	K16197	NA
2	ENSDARG00000016750	abcc6a	0.708529	0.415501	0.769973	3.33854e-20	8.14304e-16	ATP-binding cassette, sub-family C (CFTR/MRP), member 6a [Source:ZFIN;Acc:ZDB-GENE-050517-18]	GO:0000166(nucleotide binding);GO:0005524(ATP binding);GO:0005774(vacuolar membrane);GO:0016020(membrane);GO:0016021(integral component of membrane);GO:0016887(ATPase activity);GO:0022857(transmembrane transporter activity);GO:0030500(regulation of bone mineralization);GO:0042626(ATPase activity, coupled to transmembrane movement of substances);GO:0043009(chordate embryonic development);GO:005508…	02010(ABC transporters)	K05665	EC:7.6.2.3
2	ENSDARG00000101471	fgd4a	0.639874	0.402086	0.670283	1.10939e-19	2.70591e-15	FYVE, RhoGEF and PH domain containing 4a [Source:ZFIN;Acc:ZDB-GENE-050420-347]	GO:0005085(guanyl-nucleotide exchange factor activity);GO:0005089(Rho guanyl-nucleotide exchange factor activity);GO:0035023(regulation of Rho protein signal transduction);GO:0046872(metal ion binding)	NA	K05723	NA
2	ENSDARG00000103720	zgc:162730	14.6487	7.4443	0.976565	1.11389e-19	2.71688e-15	zgc:162730 [Source:ZFIN;Acc:ZDB-GENE-030131-6366]	GO:0003730(mRNA 3'-UTR binding);GO:0005829(cytosol);GO:0046872(metal ion binding);GO:0061158(3'-UTR-mediated mRNA destabilization)	NA	NA	NA
2	ENSDARG00000054063	arpc4	3.05994	1.53973	0.990828	1.35569e-19	3.30665e-15	actin related protein 2/3 complex, subunit 4 [Source:ZFIN;Acc:ZDB-GENE-010724-9]	GO:0003779(actin binding);GO:0005737(cytoplasm);GO:0005856(cytoskeleton);GO:0005885(Arp2/3 protein complex);GO:0015629(actin cytoskeleton);GO:0030041(actin filament polymerization);GO:0030833(regulation of actin filament polymerization);GO:0034314(Arp2/3 complex-mediated actin nucleation)	04144(Endocytosis);04810(Regulation of actin cytoskeleton);05132(Salmonella infection)	K05755	NA
2	ENSDARG00000099093	dock1	0.661878	0.414356	0.675695	1.86411e-19	4.54675e-15	dedicator of cytokinesis 1 [Source:ZFIN;Acc:ZDB-GENE-080108-5]	GO:0005085(guanyl-nucleotide exchange factor activity);GO:0005096(GTPase activator activity);GO:0005515(protein binding);GO:0007010(cytoskeleton organization);GO:0007264(small GTPase mediated signal transduction);GO:0007520(myoblast fusion);GO:0016020(membrane);GO:0016021(integral component of membrane);GO:0016477(cell migration);GO:0022011(myelination in peripheral nervous system);GO:0043547(pos…	04510(Focal adhesion);04810(Regulation of actin cytoskeleton)	K13708	NA
2	ENSDARG00000103425	CR457444.4	0.591316	0.382359	0.629	2.82027e-19	6.87892e-15	NA	NA	NA	NA	NA
2	ENSDARG00000095351	CU914776.1	11.3409	4.54413	1.31946	3.22899e-19	7.87582e-15	NA	NA	NA	NA	NA
2	ENSDARG00000042876	abracl	3.09577	1.55374	0.994557	3.96471e-19	9.67033e-15	ABRA C-terminal like [Source:ZFIN;Acc:ZDB-GENE-030131-8594]	GO:0032970(regulation of actin filament-based process)	NA	NA	NA
2	ENSDARG00000026829	cotl1	7.62141	3.55916	1.09852	4.49881e-19	1.0973e-14	coactosin-like F-actin binding protein 1 [Source:ZFIN;Acc:ZDB-GENE-030131-8325]	GO:0003779(actin binding);GO:0005622(intracellular)	NA	NA	NA
2	ENSDARG00000005423	pgam1a	6.92763	3.73291	0.892059	4.83558e-19	1.17945e-14	phosphoglycerate mutase 1a [Source:ZFIN;Acc:ZDB-GENE-030131-1827]	GO:0003824(catalytic activity);GO:0004082(bisphosphoglycerate mutase activity);GO:0004619(phosphoglycerate mutase activity);GO:0006096(glycolytic process);GO:0016853(isomerase activity);GO:0016868(intramolecular transferase activity, phosphotransferases)	00010(Glycolysis / Gluconeogenesis);00260(Glycine, serine and threonine metabolism)	K01834	EC:5.4.2.11
2	ENSDARG00000034555	pard3bb	0.879619	0.47286	0.895465	4.88806e-19	1.19225e-14	par-3 family cell polarity regulator beta b [Source:ZFIN;Acc:ZDB-GENE-070912-290]	GO:0000226(microtubule cytoskeleton organization);GO:0005515(protein binding);GO:0005737(cytoplasm);GO:0005912(adherens junction);GO:0005913(cell-cell adherens junction);GO:0005938(cell cortex);GO:0007155(cell adhesion);GO:0008104(protein localization);GO:0016324(apical plasma membrane);GO:0030010(establishment of cell polarity);GO:0035091(phosphatidylinositol binding);GO:0043296(apical junction …	NA	NA	NA
2	ENSDARG00000075989	arpc2	5.93863	3.26333	0.863784	6.16534e-19	1.50379e-14	actin related protein 2/3 complex, subunit 2 [Source:ZFIN;Acc:ZDB-GENE-030131-5276]	GO:0003779(actin binding);GO:0005200(structural constituent of cytoskeleton);GO:0005737(cytoplasm);GO:0005856(cytoskeleton);GO:0005885(Arp2/3 protein complex);GO:0015629(actin cytoskeleton);GO:0030041(actin filament polymerization);GO:0030833(regulation of actin filament polymerization);GO:0034314(Arp2/3 complex-mediated actin nucleation);GO:0051015(actin filament binding)	04144(Endocytosis);04810(Regulation of actin cytoskeleton);05132(Salmonella infection)	K05758	NA
2	ENSDARG00000053568	pstpip1b	1.09032	0.585323	0.89744	6.35337e-19	1.54965e-14	proline-serine-threonine phosphatase interacting protein 1b [Source:ZFIN;Acc:ZDB-GENE-051127-25]	GO:0003674(molecular_function);GO:0005515(protein binding);GO:0005575(cellular_component);GO:0005737(cytoplasm);GO:0005856(cytoskeleton);GO:0005884(actin filament);GO:0005886(plasma membrane);GO:0008092(cytoskeletal protein binding);GO:0030041(actin filament polymerization);GO:0051015(actin filament binding)	04621(NOD-like receptor signaling pathway)	K12804	NA
2	ENSDARG00000071437	ptprc	9.59756	5.22992	0.875878	1.49598e-18	3.64883e-14	protein tyrosine phosphatase, receptor type, C [Source:ZFIN;Acc:ZDB-GENE-050208-585]	GO:0004721(phosphoprotein phosphatase activity);GO:0004725(protein tyrosine phosphatase activity);GO:0005515(protein binding);GO:0006470(protein dephosphorylation);GO:0016020(membrane);GO:0016021(integral component of membrane);GO:0016311(dephosphorylation);GO:0016787(hydrolase activity);GO:0016791(phosphatase activity);GO:0035335(peptidyl-tyrosine dephosphorylation)	04514(Cell adhesion molecules (CAMs))	K06478	EC:3.1.3.48
2	ENSDARG00000117587	BX537313.1	0.575296	0.371449	0.631142	2.3957e-18	5.84334e-14	NA	NA	NA	NA	NA
2	ENSDARG00000089327	BX120005.1	5.55396	2.51263	1.14432	3.72031e-18	9.07421e-14	cytotoxic and regulatory T-cell molecule [Source:NCBI gene;Acc:101884219]	GO:0016020(membrane);GO:0016021(integral component of membrane)	NA	K16361	NA
2	ENSDARG00000013794	klf11b	1.46676	0.737137	0.992628	4.56205e-18	1.11273e-13	Kruppel-like factor 11b [Source:ZFIN;Acc:ZDB-GENE-061103-82]	GO:0000981(DNA-binding transcription factor activity, RNA polymerase II-specific);GO:0003676(nucleic acid binding);GO:0005634(nucleus);GO:0006357(regulation of transcription by RNA polymerase II)	NA	K09209	NA
2	ENSDARG00000041923	ccl38.6	15.307	6.80339	1.16986	7.878e-18	1.92152e-13	chemokine (C-C motif) ligand 38, duplicate 6 [Source:ZFIN;Acc:ZDB-GENE-041014-165]	GO:0005125(cytokine activity);GO:0005576(extracellular region);GO:0005615(extracellular space);GO:0006935(chemotaxis);GO:0006955(immune response);GO:0008009(chemokine activity);GO:0010469(regulation of signaling receptor activity);GO:0060326(cell chemotaxis)	04060(Cytokine-cytokine receptor interaction)	K16596	NA
2	ENSDARG00000087402	tpm1	2.23228	1.20851	0.885286	1.30955e-17	3.19413e-13	tropomyosin 1 (alpha) [Source:ZFIN;Acc:ZDB-GENE-040426-854]	GO:0005884(actin filament);GO:0007015(actin filament organization);GO:0051015(actin filament binding)	04260(Cardiac muscle contraction);04261(Adrenergic signaling in cardiomyocytes)	K10373	NA
2	ENSDARG00000071499	cxcl32b.1	2.50418	1.33175	0.911014	2.07545e-17	5.06224e-13	chemokine (C-X-C motif) ligand 32b, duplicate 1 [Source:ZFIN;Acc:ZDB-GENE-140715-4]	GO:0002548(monocyte chemotaxis);GO:0005576(extracellular region);GO:0005615(extracellular space);GO:0006954(inflammatory response);GO:0006955(immune response);GO:0007186(G protein-coupled receptor signaling pathway);GO:0008009(chemokine activity);GO:0030593(neutrophil chemotaxis);GO:0043547(positive regulation of GTPase activity);GO:0048020(CCR chemokine receptor binding);GO:0048247(lymphocyte ch…	NA	NA	NA
2	ENSDARG00000030012	lrrfip1a	2.99857	1.58726	0.917733	2.78577e-17	6.79476e-13	leucine rich repeat (in FLII) interacting protein 1a [Source:ZFIN;Acc:ZDB-GENE-030131-99]	GO:0006355(regulation of transcription, DNA-templated)	NA	NA	NA
2	ENSDARG00000020929	fam49ba	2.34171	1.22322	0.936879	3.95007e-17	9.63462e-13	family with sequence similarity 49 member Ba [Source:ZFIN;Acc:ZDB-GENE-030131-9537]	GO:0003674(molecular_function);GO:0005575(cellular_component);GO:0008150(biological_process)	NA	NA	NA
2	ENSDARG00000012388	cox4i1l	4.80344	2.40082	1.00054	4.52793e-17	1.10441e-12	cytochrome c oxidase subunit 4I1, like [Source:ZFIN;Acc:ZDB-GENE-130814-2]	GO:0004129(cytochrome-c oxidase activity);GO:0005751(mitochondrial respiratory chain complex IV);GO:0006123(mitochondrial electron transport, cytochrome c to oxygen);GO:0016020(membrane);GO:0016021(integral component of membrane);GO:1902600(proton transmembrane transport)	00190(Oxidative phosphorylation);04260(Cardiac muscle contraction)	K02263	NA
2	ENSDARG00000055715	capn8	0.425448	0.298963	0.509018	1.0777e-16	2.62861e-12	calpain 8 [Source:ZFIN;Acc:ZDB-GENE-050522-279]	GO:0004198(calcium-dependent cysteine-type endopeptidase activity);GO:0005509(calcium ion binding);GO:0005622(intracellular);GO:0005737(cytoplasm);GO:0006508(proteolysis);GO:0008233(peptidase activity);GO:0008234(cysteine-type peptidase activity);GO:0016787(hydrolase activity);GO:0051493(regulation of cytoskeleton organization)	NA	NA	NA
2	ENSDARG00000058606	sik1	6.08958	2.98097	1.03056	1.36394e-16	3.32678e-12	salt-inducible kinase 1 [Source:ZFIN;Acc:ZDB-GENE-030131-9446]	GO:0004672(protein kinase activity);GO:0004674(protein serine/threonine kinase activity);GO:0005524(ATP binding);GO:0005634(nucleus);GO:0005737(cytoplasm);GO:0006468(protein phosphorylation);GO:0031588(nucleotide-activated protein kinase complex);GO:0032007(negative regulation of TOR signaling);GO:0035556(intracellular signal transduction);GO:0042149(cellular response to glucose starvation)	NA	K19008	EC:2.7.11.1
2	ENSDARG00000099766	myl12.1	9.56153	6.12934	0.641509	3.09138e-16	7.5402e-12	myosin, light chain 12, genome duplicate 1 [Source:ZFIN;Acc:ZDB-GENE-030131-4918]	GO:0005509(calcium ion binding)	04270(Vascular smooth muscle contraction);04510(Focal adhesion);04530(Tight junction);04810(Regulation of actin cytoskeleton)	K12755	NA
2	ENSDARG00000035652	sat1a.1	1.34048	0.731719	0.873389	3.19896e-16	7.80258e-12	spermidine/spermine N1-acetyltransferase 1a, duplicate 1 [Source:ZFIN;Acc:ZDB-GENE-050913-41]	GO:0004145(diamine N-acetyltransferase activity);GO:0005515(protein binding);GO:0008080(N-acetyltransferase activity);GO:0019809(spermidine binding);GO:0032918(spermidine acetylation)	00330(Arginine and proline metabolism);04216(Ferroptosis)	K00657	EC:2.3.1.57
2	ENSDARG00000056108	ndufa4	2.26349	1.2026	0.912388	7.03142e-16	1.71503e-11	NADH:ubiquinone oxidoreductase subunit A4 [Source:ZFIN;Acc:ZDB-GENE-040426-1962]	GO:0004129(cytochrome-c oxidase activity);GO:0005739(mitochondrion);GO:0005743(mitochondrial inner membrane);GO:0005751(mitochondrial respiratory chain complex IV);GO:0016020(membrane);GO:0022900(electron transport chain);GO:0055114(oxidation-reduction process);GO:0070469(respirasome);GO:1902600(proton transmembrane transport)	00190(Oxidative phosphorylation)	K03948	NA
2	ENSDARG00000033738	zgc:153867	5.54924	3.16491	0.810125	7.54362e-16	1.83996e-11	zgc:153867 [Source:ZFIN;Acc:ZDB-GENE-030131-9170]	GO:0005509(calcium ion binding)	04270(Vascular smooth muscle contraction);04530(Tight junction)	K12751	NA
2	ENSDARG00000062811	p2ry10	1.69197	0.882016	0.939823	9.84504e-16	2.4013e-11	P2Y receptor family member 10 [Source:ZFIN;Acc:ZDB-GENE-070410-105]	GO:0004930(G protein-coupled receptor activity);GO:0005887(integral component of plasma membrane);GO:0007186(G protein-coupled receptor signaling pathway);GO:0016020(membrane);GO:0016021(integral component of membrane);GO:0035025(positive regulation of Rho protein signal transduction);GO:0051482(positive regulation of cytosolic calcium ion concentration involved in phospholipase C-activating G pr…	04080(Neuroactive ligand-receptor interaction)	K04274	NA
2	ENSDARG00000029596	trim55a	0.341584	0.254613	0.423938	1.17985e-15	2.87777e-11	tripartite motif containing 55a [Source:ZFIN;Acc:ZDB-GENE-040718-50]	GO:0008270(zinc ion binding);GO:0046872(metal ion binding)	NA	K10654	NA
2	ENSDARG00000070601	RASSF5	4.86023	2.37142	1.03527	1.35478e-15	3.30444e-11	si:dkey-85p17.3 [Source:ZFIN;Acc:ZDB-GENE-141219-8]	GO:0005856(cytoskeleton);GO:0007165(signal transduction);GO:0017016(Ras GTPase binding);GO:0035556(intracellular signal transduction);GO:0042981(regulation of apoptotic process);GO:0046872(metal ion binding)	04218(Cellular senescence)	K08015	NA
2	ENSDARG00000103648	znf536	1.0969	0.621486	0.819642	2.42348e-15	5.91112e-11	zinc finger protein 536 [Source:ZFIN;Acc:ZDB-GENE-030616-624]	GO:0003676(nucleic acid binding)	NA	NA	NA
2	ENSDARG00000103984	cyth4b	1.04889	0.618578	0.761838	2.64968e-15	6.46283e-11	cytohesin 4b [Source:ZFIN;Acc:ZDB-GENE-080219-45]	GO:0005086(ARF guanyl-nucleotide exchange factor activity);GO:0032012(regulation of ARF protein signal transduction)	04144(Endocytosis)	K18441	NA
2	ENSDARG00000054542	il12bb	8.84607	2.23829	1.98264	2.68936e-15	6.55962e-11	interleukin 12B, b [Source:ZFIN;Acc:ZDB-GENE-030131-7937]	GO:0004896(cytokine receptor activity);GO:0005125(cytokine activity);GO:0005515(protein binding);GO:0005576(extracellular region);GO:0005615(extracellular space);GO:0010469(regulation of signaling receptor activity);GO:0019221(cytokine-mediated signaling pathway)	NA	NA	NA
2	ENSDARG00000019098	cd82a	0.752534	0.438273	0.779928	2.93069e-15	7.14824e-11	CD82 molecule a [Source:ZFIN;Acc:ZDB-GENE-030131-2818]	GO:0003674(molecular_function);GO:0005887(integral component of plasma membrane);GO:0007166(cell surface receptor signaling pathway);GO:0016020(membrane);GO:0016021(integral component of membrane)	04115(p53 signaling pathway)	K06509	NA
2	ENSDARG00000076779	fam13b	1.32848	0.731361	0.861124	3.84624e-15	9.38137e-11	family with sequence similarity 13 member B [Source:ZFIN;Acc:ZDB-GENE-030131-4913]	GO:0007165(signal transduction)	NA	NA	NA
2	ENSDARG00000012729	hcls1	2.81085	1.47694	0.928395	6.10114e-15	1.48813e-10	hematopoietic cell-specific Lyn substrate 1 [Source:ZFIN;Acc:ZDB-GENE-030131-7191]	GO:0003779(actin binding);GO:0005515(protein binding);GO:0030041(actin filament polymerization)	04530(Tight junction)	K06106	NA
2	ENSDARG00000105377	si:ch211-277c7.6	2.22674	0.786324	1.50174	7.13199e-15	1.73956e-10	si:ch211-277c7.6 [Source:ZFIN;Acc:ZDB-GENE-160114-45]	NA	NA	NA	NA
2	ENSDARG00000103178	CR457444.3	0.851888	0.50547	0.753039	7.82579e-15	1.90879e-10	NA	NA	NA	NA	NA
2	ENSDARG00000103380	si:ch73-21k16.1	0.245373	0.197028	0.316578	1.16847e-14	2.85e-10	si:ch73-21k16.1 [Source:ZFIN;Acc:ZDB-GENE-081031-51]	GO:0003713(transcription coactivator activity);GO:0005634(nucleus);GO:0006357(regulation of transcription by RNA polymerase II);GO:0008195(phosphatidate phosphatase activity);GO:0009062(fatty acid catabolic process);GO:0016311(dephosphorylation);GO:0019432(triglyceride biosynthetic process);GO:0032869(cellular response to insulin stimulus);GO:0045944(positive regulation of transcription by RNA po…	00561(Glycerolipid metabolism);00564(Glycerophospholipid metabolism)	K15728	EC:3.1.3.4
2	ENSDARG00000094781	CU914617.1	0.23665	0.191364	0.306437	1.16847e-14	2.85e-10	NA	NA	NA	NA	NA
2	ENSDARG00000095273	cox8a	4.60274	2.84207	0.695549	1.70004e-14	4.14656e-10	cytochrome c oxidase subunit 8A [Source:ZFIN;Acc:ZDB-GENE-030131-9136]	GO:0004129(cytochrome-c oxidase activity);GO:0005739(mitochondrion);GO:0016020(membrane);GO:0016021(integral component of membrane);GO:0022900(electron transport chain);GO:0045277(respiratory chain complex IV);GO:1902600(proton transmembrane transport)	00190(Oxidative phosphorylation);04260(Cardiac muscle contraction)	K02273	NA
2	ENSDARG00000076800	tnfrsf18	19.7923	5.62647	1.81464	4.32036e-14	1.05378e-09	tumor necrosis factor receptor superfamily, member 18 [Source:ZFIN;Acc:ZDB-GENE-101104-7]	GO:0005031(tumor necrosis factor-activated receptor activity);GO:0005515(protein binding);GO:0005887(integral component of plasma membrane);GO:0016020(membrane);GO:0016021(integral component of membrane);GO:0033209(tumor necrosis factor-mediated signaling pathway);GO:0043066(negative regulation of apoptotic process)	04060(Cytokine-cytokine receptor interaction)	K05154	NA
2	ENSDARG00000007377	odc1	3.41006	1.68071	1.02073	4.72364e-14	1.15214e-09	ornithine decarboxylase 1 [Source:ZFIN;Acc:ZDB-GENE-010816-1]	GO:0003824(catalytic activity);GO:0004586(ornithine decarboxylase activity);GO:0005737(cytoplasm);GO:0006596(polyamine biosynthetic process);GO:0033387(putrescine biosynthetic process from ornithine);GO:0042462(eye photoreceptor cell development)	00330(Arginine and proline metabolism);00480(Glutathione metabolism)	K01581	EC:4.1.1.17
2	ENSDARG00000017219	pabpc1a	18.3231	13.2179	0.471176	5.30694e-14	1.29442e-09	poly(A) binding protein, cytoplasmic 1a [Source:ZFIN;Acc:ZDB-GENE-030131-3238]	GO:0003676(nucleic acid binding);GO:0003723(RNA binding);GO:0003730(mRNA 3'-UTR binding);GO:0005634(nucleus);GO:0005737(cytoplasm);GO:0005829(cytosol);GO:0007507(heart development);GO:0008143(poly(A) binding);GO:0008266(poly(U) RNA binding);GO:0010494(cytoplasmic stress granule);GO:1990904(ribonucleoprotein complex)	03013(RNA transport);03015(mRNA surveillance pathway);03018(RNA degradation)	K13126	NA
2	ENSDARG00000090767	si:ch211-136m16.8	5.308	2.62556	1.01554	6.9976e-14	1.70679e-09	si:ch211-136m16.8 [Source:ZFIN;Acc:ZDB-GENE-121214-301]	NA	NA	NA	NA
2	ENSDARG00000060248	fgd4b	2.70865	1.35525	0.99902	7.00976e-14	1.70975e-09	FYVE, RhoGEF and PH domain containing 4b [Source:ZFIN;Acc:ZDB-GENE-110421-6]	GO:0005089(Rho guanyl-nucleotide exchange factor activity);GO:0035023(regulation of Rho protein signal transduction);GO:0046872(metal ion binding)	NA	K05723	NA
2	ENSDARG00000038095	socs1a	1.14942	0.700222	0.715015	7.46951e-14	1.82189e-09	suppressor of cytokine signaling 1a [Source:ZFIN;Acc:ZDB-GENE-040801-205]	GO:0005737(cytoplasm);GO:0005942(phosphatidylinositol 3-kinase complex);GO:0016567(protein ubiquitination);GO:0032868(response to insulin);GO:0035162(embryonic hemopoiesis);GO:0042509(regulation of tyrosine phosphorylation of STAT protein);GO:0043551(regulation of phosphatidylinositol 3-kinase activity);GO:0046426(negative regulation of receptor signaling pathway via JAK-STAT);GO:0046627(negative…	04120(Ubiquitin mediated proteolysis);04910(Insulin signaling pathway)	K04694	NA
2	ENSDARG00000090389	ndufv3	1.57988	0.881851	0.841207	1.63391e-13	3.98527e-09	NADH:ubiquinone oxidoreductase subunit V3 [Source:ZFIN;Acc:ZDB-GENE-030131-6500]	GO:0005739(mitochondrion);GO:0005747(mitochondrial respiratory chain complex I)	00190(Oxidative phosphorylation)	K03944	NA
2	ENSDARG00000101844	mibp2	8.35237	5.14914	0.697854	1.86132e-13	4.53995e-09	muscle-specific beta 1 integrin binding protein 2 [Source:ZFIN;Acc:ZDB-GENE-031113-14]	GO:0007045(cell-substrate adherens junction assembly);GO:0007229(integrin-mediated signaling pathway);GO:0007517(muscle organ development);GO:0016301(kinase activity);GO:0016310(phosphorylation);GO:0070831(basement membrane assembly)	00760(Nicotinate and nicotinamide metabolism)	K10524	2.7.1.173;EC:2.7.1.22
2	ENSDARG00000014439	dgkza	1.99842	1.12328	0.831142	2.27721e-13	5.55433e-09	diacylglycerol kinase, zeta a [Source:ZFIN;Acc:ZDB-GENE-111104-3]	GO:0000166(nucleotide binding);GO:0003951(NAD+ kinase activity);GO:0004143(diacylglycerol kinase activity);GO:0005515(protein binding);GO:0005524(ATP binding);GO:0005634(nucleus);GO:0007165(signal transduction);GO:0007205(protein kinase C-activating G protein-coupled receptor signaling pathway);GO:0016301(kinase activity);GO:0016310(phosphorylation);GO:0016740(transferase activity);GO:0035556(int…	00561(Glycerolipid metabolism);00564(Glycerophospholipid metabolism);04070(Phosphatidylinositol signaling system)	K00901	EC:2.7.1.107
2	ENSDARG00000016789	zgc:152891	0.66813	0.433904	0.622754	2.86153e-13	6.97957e-09	zgc:152891 [Source:ZFIN;Acc:ZDB-GENE-061013-229]	GO:0005506(iron ion binding);GO:0005515(protein binding);GO:0005575(cellular_component);GO:0016491(oxidoreductase activity);GO:0016702(oxidoreductase activity, acting on single donors with incorporation of molecular oxygen, incorporation of two atoms of oxygen);GO:0046872(metal ion binding);GO:0051213(dioxygenase activity);GO:0055114(oxidation-reduction process)	NA	NA	NA
2	ENSDARG00000020746	gfi1aa	0.365841	0.270298	0.436669	2.8982e-13	7.06899e-09	growth factor independent 1A transcription repressor a [Source:ZFIN;Acc:ZDB-GENE-050522-534]	GO:0003676(nucleic acid binding);GO:0006355(regulation of transcription, DNA-templated);GO:0030097(hemopoiesis);GO:0030218(erythrocyte differentiation);GO:0051569(regulation of histone H3-K4 methylation);GO:0060215(primitive hemopoiesis)	NA	NA	NA
2	ENSDARG00000013968	psap	2.58142	1.54559	0.740007	2.92899e-13	7.14409e-09	prosaposin [Source:ZFIN;Acc:ZDB-GENE-020108-1]	GO:0005764(lysosome);GO:0006629(lipid metabolic process);GO:0006665(sphingolipid metabolic process)	04142(Lysosome)	K12382	NA
2	ENSDARG00000074283	inpp5d	1.57275	0.891943	0.818269	3.42468e-13	8.35314e-09	inositol polyphosphate-5-phosphatase D [Source:ZFIN;Acc:ZDB-GENE-100922-30]	GO:0016787(hydrolase activity);GO:0046856(phosphatidylinositol dephosphorylation);GO:0090024(negative regulation of neutrophil chemotaxis)	00562(Inositol phosphate metabolism);04070(Phosphatidylinositol signaling system)	K03084	EC:3.1.3.86
2	ENSDARG00000021483	cdc14b	1.22364	0.708197	0.788955	3.89407e-13	9.49802e-09	cell division cycle 14B [Source:ZFIN;Acc:ZDB-GENE-040426-820]	GO:0000226(microtubule cytoskeleton organization);GO:0000278(mitotic cell cycle);GO:0000793(condensed chromosome);GO:0000922(spindle pole);GO:0004722(protein serine/threonine phosphatase activity);GO:0004725(protein tyrosine phosphatase activity);GO:0005730(nucleolus);GO:0005737(cytoplasm);GO:0005813(centrosome);GO:0005819(spindle);GO:0006470(protein dephosphorylation);GO:0007096(regulation of ex…	04110(Cell cycle)	K06639	3.1.3.48;EC:3.1.3.16
2	ENSDARG00000091003	il34	4.46181	2.11419	1.07753	4.31878e-13	1.05339e-08	interleukin 34 [Source:ZFIN;Acc:ZDB-GENE-050419-150]	GO:0001934(positive regulation of protein phosphorylation);GO:0005157(macrophage colony-stimulating factor receptor binding);GO:0005615(extracellular space);GO:0008284(positive regulation of cell population proliferation)	04060(Cytokine-cytokine receptor interaction)	K22633	NA
2	ENSDARG00000103276	fcer1g	4.7686	2.75452	0.791764	4.37291e-13	1.0666e-08	Fc fragment of IgE, high affinity I, receptor for; gamma polypeptide [Source:ZFIN;Acc:ZDB-GENE-061130-3]	GO:0016020(membrane);GO:0016021(integral component of membrane)	04625(C-type lectin receptor signaling pathway)	K07983	NA
2	ENSDARG00000068996	hist2h2l	2.62047	1.28236	1.03103	4.85016e-13	1.183e-08	histone 2, H2, like [Source:ZFIN;Acc:ZDB-GENE-031118-36]	GO:0000786(nucleosome);GO:0000790(nuclear chromatin);GO:0003677(DNA binding);GO:0005634(nucleus);GO:0005694(chromosome);GO:0006334(nucleosome assembly);GO:0046982(protein heterodimerization activity)	NA	K11252	NA
2	ENSDARG00000100055	tox2	3.98001	2.38529	0.738608	5.38813e-13	1.31422e-08	TOX high mobility group box family member 2 [Source:ZFIN;Acc:ZDB-GENE-040426-2095]	GO:0003677(DNA binding);GO:0005634(nucleus);GO:0072357(PTW/PP1 phosphatase complex)	NA	NA	NA
2	ENSDARG00000105285	FAT4	0.311273	0.23857	0.383771	5.45025e-13	1.32937e-08	FAT atypical cadherin 4 [Source:NCBI gene;Acc:101882648]	GO:0005509(calcium ion binding);GO:0005886(plasma membrane);GO:0007155(cell adhesion);GO:0007156(homophilic cell adhesion via plasma membrane adhesion molecules);GO:0016020(membrane);GO:0016021(integral component of membrane)	NA	K16669	NA
2	ENSDARG00000058302	sh3bgrl	3.65779	2.34511	0.641316	5.96703e-13	1.45542e-08	SH3 domain binding glutamate-rich protein like [Source:ZFIN;Acc:ZDB-GENE-040426-1376]	GO:0003674(molecular_function);GO:0008150(biological_process)	NA	NA	NA
2	ENSDARG00000078119	sh3bp1	1.17429	0.685082	0.777446	8.27048e-13	2.01725e-08	SH3-domain binding protein 1 [Source:ZFIN;Acc:ZDB-GENE-121128-2]	GO:0005096(GTPase activator activity);GO:0005515(protein binding);GO:0005737(cytoplasm);GO:0007165(signal transduction);GO:0032956(regulation of actin cytoskeleton organization);GO:0043547(positive regulation of GTPase activity);GO:0048365(Rac GTPase binding)	NA	K20652	NA
2	ENSDARG00000045230	cox6b1	3.55565	2.05653	0.789904	1.09225e-12	2.66412e-08	cytochrome c oxidase subunit 6B1 [Source:ZFIN;Acc:ZDB-GENE-040718-448]	GO:0005515(protein binding);GO:0005739(mitochondrion)	00190(Oxidative phosphorylation);04260(Cardiac muscle contraction)	K02267	NA
2	ENSDARG00000058647	hck	1.57199	0.913811	0.782623	1.2957e-12	3.16034e-08	HCK proto-oncogene, Src family tyrosine kinase [Source:ZFIN;Acc:ZDB-GENE-090313-72]	GO:0000166(nucleotide binding);GO:0004672(protein kinase activity);GO:0004713(protein tyrosine kinase activity);GO:0004715(non-membrane spanning protein tyrosine kinase activity);GO:0005102(signaling receptor binding);GO:0005515(protein binding);GO:0005524(ATP binding);GO:0006468(protein phosphorylation);GO:0007169(transmembrane receptor protein tyrosine kinase signaling pathway);GO:0016301(kinas…	NA	K08893	EC:2.7.10.2
2	ENSDARG00000062057	zgc:174945	1.5658	0.880174	0.831035	1.34517e-12	3.281e-08	zgc:174945 [Source:ZFIN;Acc:ZDB-GENE-080204-80]	GO:0003674(molecular_function);GO:0005575(cellular_component);GO:0008150(biological_process)	NA	NA	NA
2	ENSDARG00000055374	irf4b	1.49427	0.830442	0.847494	1.45253e-12	3.54286e-08	interferon regulatory factor 4b [Source:ZFIN;Acc:ZDB-GENE-041001-131]	GO:0000981(DNA-binding transcription factor activity, RNA polymerase II-specific);GO:0002376(immune system process);GO:0003700(DNA-binding transcription factor activity);GO:0005515(protein binding);GO:0005634(nucleus);GO:0006355(regulation of transcription, DNA-templated);GO:0006357(regulation of transcription by RNA polymerase II);GO:0044212(transcription regulatory region DNA binding)	NA	K09445	NA
2	ENSDARG00000095019	lmo2	0.465941	0.332727	0.485811	1.45698e-12	3.55373e-08	LIM domain only 2 (rhombotin-like 1) [Source:ZFIN;Acc:ZDB-GENE-980526-419]	GO:0001568(blood vessel development);GO:0001935(endothelial cell proliferation);GO:0003677(DNA binding);GO:0005634(nucleus);GO:0007275(multicellular organism development);GO:0030097(hemopoiesis);GO:0030218(erythrocyte differentiation);GO:0031101(fin regeneration);GO:0032991(protein-containing complex);GO:0035162(embryonic hemopoiesis);GO:0046872(metal ion binding);GO:0048821(erythrocyte developme…	NA	NA	NA
2	ENSDARG00000007720	sub1b	0.925046	0.571252	0.695397	1.7982e-12	4.38599e-08	SUB1 homolog, transcriptional regulator b [Source:ZFIN;Acc:ZDB-GENE-040718-209]	GO:0003677(DNA binding);GO:0003713(transcription coactivator activity);GO:0005634(nucleus);GO:0005667(transcription factor complex);GO:0006355(regulation of transcription, DNA-templated);GO:0060261(positive regulation of transcription initiation from RNA polymerase II promoter)	NA	NA	NA
2	ENSDARG00000054191	pgk1	5.03319	3.14887	0.676638	2.01874e-12	4.92392e-08	phosphoglycerate kinase 1 [Source:ZFIN;Acc:ZDB-GENE-040426-2711]	GO:0001666(response to hypoxia);GO:0004618(phosphoglycerate kinase activity);GO:0005524(ATP binding);GO:0005829(cytosol);GO:0006094(gluconeogenesis);GO:0006096(glycolytic process);GO:0016301(kinase activity);GO:0016310(phosphorylation);GO:0016740(transferase activity);GO:0043531(ADP binding);GO:1903862(positive regulation of oxidative phosphorylation)	00010(Glycolysis / Gluconeogenesis)	K00927	EC:2.7.2.3
2	ENSDARG00000062552	lpar6a	1.39391	0.847265	0.718255	2.13492e-12	5.20729e-08	lysophosphatidic acid receptor 6a [Source:ZFIN;Acc:ZDB-GENE-061013-343]	GO:0001525(angiogenesis);GO:0004930(G protein-coupled receptor activity);GO:0005887(integral component of plasma membrane);GO:0007165(signal transduction);GO:0007186(G protein-coupled receptor signaling pathway);GO:0007188(adenylate cyclase-modulating G protein-coupled receptor signaling pathway);GO:0016020(membrane);GO:0016021(integral component of membrane);GO:0035025(positive regulation of Rho…	04080(Neuroactive ligand-receptor interaction)	K04273	NA
2	ENSDARG00000099281	si:dkey-112e7.2	3.20045	1.94736	0.716755	2.16518e-12	5.2811e-08	si:dkey-112e7.2 [Source:ZFIN;Acc:ZDB-GENE-141216-229]	GO:0016020(membrane);GO:0016021(integral component of membrane)	NA	NA	NA
2	ENSDARG00000076721	zgc:171686	0.892326	0.513933	0.795991	2.67191e-12	6.51705e-08	zgc:171686 [Source:ZFIN;Acc:ZDB-GENE-080220-56]	GO:0016020(membrane);GO:0016021(integral component of membrane)	NA	NA	NA
2	ENSDARG00000059933	plpp3	0.48185	0.337148	0.515202	3.22659e-12	7.86998e-08	phospholipid phosphatase 3 [Source:ZFIN;Acc:ZDB-GENE-060526-241]	GO:0005887(integral component of plasma membrane);GO:0006644(phospholipid metabolic process);GO:0008195(phosphatidate phosphatase activity);GO:0016020(membrane);GO:0016021(integral component of membrane);GO:0016791(phosphatase activity);GO:0030111(regulation of Wnt signaling pathway);GO:0042577(lipid phosphatase activity);GO:0046839(phospholipid dephosphorylation)	00561(Glycerolipid metabolism);00564(Glycerophospholipid metabolism);00565(Ether lipid metabolism);00600(Sphingolipid metabolism)	K01080	EC:3.1.3.4
2	ENSDARG00000040452	fam214a	0.918965	0.57218	0.68354	4.12046e-12	1.00502e-07	family with sequence similarity 214 member A [Source:ZFIN;Acc:ZDB-GENE-050419-204]	NA	NA	NA	NA
2	ENSDARG00000033804	snx27a	0.777539	0.499148	0.639447	4.16058e-12	1.01481e-07	sorting nexin family member 27a [Source:ZFIN;Acc:ZDB-GENE-060503-371]	GO:0005515(protein binding);GO:0005769(early endosome);GO:0006886(intracellular protein transport);GO:0007165(signal transduction);GO:0032266(phosphatidylinositol-3-phosphate binding);GO:0035091(phosphatidylinositol binding);GO:1990126(retrograde transport, endosome to plasma membrane)	NA	K17936	NA
2	ENSDARG00000077967	si:ch211-140m22.7	0.587063	0.392102	0.582286	4.56699e-12	1.11393e-07	si:ch211-140m22.7 [Source:ZFIN;Acc:ZDB-GENE-070912-73]	GO:0000276(mitochondrial proton-transporting ATP synthase complex, coupling factor F(o));GO:0005753(mitochondrial proton-transporting ATP synthase complex);GO:0015078(proton transmembrane transporter activity);GO:0015986(ATP synthesis coupled proton transport)	NA	NA	NA
2	ENSDARG00000095897	atp5f1e	5.62152	3.63341	0.629635	5.17396e-12	1.26198e-07	ATP synthase F1 subunit epsilon [Source:ZFIN;Acc:ZDB-GENE-110411-22]	GO:0000275(mitochondrial proton-transporting ATP synthase complex, catalytic core F(1));GO:0005743(mitochondrial inner membrane);GO:0015986(ATP synthesis coupled proton transport);GO:0016887(ATPase activity);GO:0046933(proton-transporting ATP synthase activity, rotational mechanism);GO:0099132(ATP hydrolysis coupled cation transmembrane transport)	00190(Oxidative phosphorylation)	K02135	NA
2	ENSDARG00000056803	ap1s1	1.49882	0.896691	0.741147	5.26843e-12	1.28502e-07	adaptor related protein complex 1 subunit sigma 1 [Source:ZFIN;Acc:ZDB-GENE-040426-1119]	GO:0005886(plasma membrane);GO:0006886(intracellular protein transport);GO:0007399(nervous system development);GO:0015031(protein transport);GO:0016020(membrane);GO:0016192(vesicle-mediated transport);GO:0030117(membrane coat);GO:0030198(extracellular matrix organization);GO:0048471(perinuclear region of cytoplasm)	04142(Lysosome)	K12394	NA
2	ENSDARG00000002506	zgc:92818	1.22448	0.680357	0.847802	5.9667e-12	1.45534e-07	zgc:92818 [Source:ZFIN;Acc:ZDB-GENE-040718-217]	NA	NA	NA	NA
2	ENSDARG00000096863	si:ch73-380l3.4	0.411264	0.292153	0.493338	6.34662e-12	1.548e-07	si:ch73-380l3.4 [Source:ZFIN;Acc:ZDB-GENE-131125-97]	GO:0016020(membrane);GO:0016021(integral component of membrane)	NA	NA	NA
2	ENSDARG00000002609	rnf145a	0.356874	0.266029	0.423832	6.84e-12	1.66834e-07	ring finger protein 145a [Source:ZFIN;Acc:ZDB-GENE-111012-3]	GO:0005783(endoplasmic reticulum);GO:0008270(zinc ion binding);GO:0012505(endomembrane system);GO:0016020(membrane);GO:0016021(integral component of membrane);GO:0016567(protein ubiquitination);GO:0046872(metal ion binding);GO:0061630(ubiquitin protein ligase activity)	NA	NA	NA
2	ENSDARG00000068367	nfkbie	9.69694	6.06792	0.676327	8.07787e-12	1.97027e-07	nuclear factor of kappa light polypeptide gene enhancer in B-cells inhibitor, epsilon [Source:ZFIN;Acc:ZDB-GENE-061215-132]	GO:0003674(molecular_function);GO:0005515(protein binding);GO:0005575(cellular_component);GO:0008150(biological_process)	04920(Adipocytokine signaling pathway)	K05872	NA
2	ENSDARG00000023188	lcp1	5.22656	3.23464	0.692257	1.13427e-11	2.7666e-07	lymphocyte cytosolic protein 1 (L-plastin) [Source:ZFIN;Acc:ZDB-GENE-991213-5]	GO:0003779(actin binding);GO:0005509(calcium ion binding);GO:0005515(protein binding);GO:0051015(actin filament binding);GO:0051017(actin filament bundle assembly)	NA	K17276	NA
2	ENSDARG00000117656	CR457444.10	0.516721	0.357366	0.531983	1.4989e-11	3.65597e-07	NA	NA	NA	NA	NA
2	ENSDARG00000068995	h2afx1	7.61274	4.35133	0.80696	1.77819e-11	4.33719e-07	H2A histone family member X1 [Source:ZFIN;Acc:ZDB-GENE-041010-42]	GO:0000786(nucleosome);GO:0000790(nuclear chromatin);GO:0003677(DNA binding);GO:0005615(extracellular space);GO:0005634(nucleus);GO:0005694(chromosome);GO:0006325(chromatin organization);GO:0045087(innate immune response);GO:0046982(protein heterodimerization activity);GO:0050830(defense response to Gram-positive bacterium);GO:0051673(membrane disruption in other organism)	04217(Necroptosis)	K11251	NA
2	ENSDARG00000054610	coro1a	8.08778	4.947	0.70919	1.87024e-11	4.5617e-07	coronin, actin binding protein, 1A [Source:ZFIN;Acc:ZDB-GENE-030131-9512]	GO:0001654(eye development);GO:0005515(protein binding);GO:0007420(brain development);GO:0021952(central nervous system projection neuron axonogenesis)	04145(Phagosome)	K13882	NA
2	ENSDARG00000077709	iqsec2b	0.301869	0.233527	0.370329	2.41956e-11	5.90154e-07	IQ motif and Sec7 domain 2b [Source:ZFIN;Acc:ZDB-GENE-081105-73]	GO:0005086(ARF guanyl-nucleotide exchange factor activity);GO:0005515(protein binding);GO:0030036(actin cytoskeleton organization);GO:0032012(regulation of ARF protein signal transduction)	04144(Endocytosis)	K12495	NA
2	ENSDARG00000012196	fer	0.257791	0.206228	0.321962	2.44e-11	5.9514e-07	fer (fps/fes related) tyrosine kinase [Source:ZFIN;Acc:ZDB-GENE-060526-234]	GO:0000166(nucleotide binding);GO:0004672(protein kinase activity);GO:0004713(protein tyrosine kinase activity);GO:0004715(non-membrane spanning protein tyrosine kinase activity);GO:0005154(epidermal growth factor receptor binding);GO:0005524(ATP binding);GO:0005737(cytoplasm);GO:0005856(cytoskeleton);GO:0006468(protein phosphorylation);GO:0006935(chemotaxis);GO:0007155(cell adhesion);GO:0008283(…	NA	K08889	EC:2.7.10.2
2	ENSDARG00000071031	snx1a	1.91503	1.09755	0.803086	2.6449e-11	6.45118e-07	sorting nexin 1a [Source:ZFIN;Acc:ZDB-GENE-060302-3]	GO:0005768(endosome);GO:0005829(cytosol);GO:0006886(intracellular protein transport);GO:0010008(endosome membrane);GO:0030904(retromer complex);GO:0035091(phosphatidylinositol binding);GO:0042147(retrograde transport, endosome to Golgi)	04144(Endocytosis)	K17917	NA
2	ENSDARG00000103049	CR392341.4	1.11024	0.613369	0.85604	2.79881e-11	6.82657e-07	uncharacterized LOC103911752 [Source:NCBI gene;Acc:103911752]	GO:0005615(extracellular space);GO:0005886(plasma membrane);GO:0006955(immune response);GO:0009897(external side of plasma membrane);GO:0016020(membrane);GO:0016021(integral component of membrane)	NA	NA	NA
2	ENSDARG00000099499	ndufa4l	4.78921	3.16619	0.597041	3.21437e-11	7.84016e-07	NADH:ubiquinone oxidoreductase subunit A4, like [Source:ZFIN;Acc:ZDB-GENE-040426-2756]	GO:0004129(cytochrome-c oxidase activity);GO:0005751(mitochondrial respiratory chain complex IV);GO:0016020(membrane);GO:0016021(integral component of membrane);GO:0022900(electron transport chain);GO:1902600(proton transmembrane transport)	00190(Oxidative phosphorylation)	K03948	NA
2	ENSDARG00000056510	gstk1	0.765341	0.492806	0.635082	3.42579e-11	8.35585e-07	glutathione S-transferase kappa 1 [Source:ZFIN;Acc:ZDB-GENE-040718-298]	GO:0004364(glutathione transferase activity);GO:0004602(glutathione peroxidase activity);GO:0005739(mitochondrion);GO:0005777(peroxisome);GO:0006749(glutathione metabolic process);GO:0015035(protein disulfide oxidoreductase activity);GO:0016740(transferase activity);GO:0055114(oxidation-reduction process);GO:0098869(cellular oxidant detoxification)	00480(Glutathione metabolism);00980(Metabolism of xenobiotics by cytochrome P450);00982(Drug metabolism - cytochrome P450);04146(Peroxisome)	K13299	EC:2.5.1.18
2	ENSDARG00000063538	kalrnb	0.63164	0.408288	0.629514	4.36797e-11	1.06539e-06	kalirin RhoGEF kinase b [Source:ZFIN;Acc:ZDB-GENE-060421-7244]	GO:0005089(Rho guanyl-nucleotide exchange factor activity);GO:0005515(protein binding);GO:0030097(hemopoiesis);GO:0035023(regulation of Rho protein signal transduction)	NA	NA	NA
2	ENSDARG00000021124	cfl1	16.5966	10.8582	0.61211	4.6653e-11	1.13791e-06	cofilin 1 [Source:ZFIN;Acc:ZDB-GENE-030131-215]	GO:0003779(actin binding);GO:0005622(intracellular);GO:0007015(actin filament organization);GO:0015629(actin cytoskeleton);GO:0030030(cell projection organization);GO:0030042(actin filament depolymerization);GO:0055113(epiboly involved in gastrulation with mouth forming second);GO:0060271(cilium assembly);GO:0061371(determination of heart left/right asymmetry);GO:0070586(cell-cell adhesion involv…	04810(Regulation of actin cytoskeleton)	K05765	NA
2	ENSDARG00000022891	zgc:175214	1.00978	0.598523	0.754565	4.71365e-11	1.14971e-06	zgc:175214 [Source:ZFIN;Acc:ZDB-GENE-080303-32]	GO:0012505(endomembrane system);GO:0016020(membrane);GO:0016021(integral component of membrane);GO:0016567(protein ubiquitination);GO:0061630(ubiquitin protein ligase activity)	NA	NA	NA
2	ENSDARG00000020893	slc25a55a	5.14782	3.27881	0.65079	5.34074e-11	1.30266e-06	solute carrier family 25, member 55a [Source:ZFIN;Acc:ZDB-GENE-040426-2745]	GO:0005313(L-glutamate transmembrane transporter activity);GO:0005743(mitochondrial inner membrane);GO:0015183(L-aspartate transmembrane transporter activity);GO:0015810(aspartate transmembrane transport);GO:0015813(L-glutamate transmembrane transport);GO:0016020(membrane);GO:0016021(integral component of membrane);GO:0022857(transmembrane transporter activity);GO:0043490(malate-aspartate shuttle…	NA	K15107	NA
2	ENSDARG00000016939	itgb2	0.841945	0.537705	0.646912	5.36803e-11	1.30932e-06	integrin, beta 2 [Source:ZFIN;Acc:ZDB-GENE-110411-4]	GO:0005178(integrin binding);GO:0005925(focal adhesion);GO:0007155(cell adhesion);GO:0007160(cell-matrix adhesion);GO:0007229(integrin-mediated signaling pathway);GO:0008305(integrin complex);GO:0009986(cell surface);GO:0016020(membrane);GO:0016021(integral component of membrane);GO:0016477(cell migration);GO:0033627(cell adhesion mediated by integrin);GO:0038023(signaling receptor activity)	04145(Phagosome);04514(Cell adhesion molecules (CAMs));04810(Regulation of actin cytoskeleton)	K06464	NA
2	ENSDARG00000099938	pigrl3.5	0.336821	0.255276	0.399924	6.28187e-11	1.53221e-06	polymeric immunoglobulin receptor-like 3.5 [Source:ZFIN;Acc:ZDB-GENE-150409-6]	GO:0016020(membrane);GO:0016021(integral component of membrane)	NA	NA	NA
2	ENSDARG00000097209	cox8b	4.203	2.48349	0.759047	6.64272e-11	1.62023e-06	cytochrome c oxidase subunit 8B [Source:ZFIN;Acc:ZDB-GENE-110620-4]	GO:0004129(cytochrome-c oxidase activity);GO:0005739(mitochondrion);GO:0022900(electron transport chain);GO:0045277(respiratory chain complex IV);GO:1902600(proton transmembrane transport)	00190(Oxidative phosphorylation);04260(Cardiac muscle contraction)	K02273	NA
2	ENSDARG00000098108	dusp2	49.8068	37.0389	0.427302	6.85689e-11	1.67246e-06	dual specificity phosphatase 2 [Source:ZFIN;Acc:ZDB-GENE-040801-188]	GO:0000188(inactivation of MAPK activity);GO:0004721(phosphoprotein phosphatase activity);GO:0004725(protein tyrosine phosphatase activity);GO:0005634(nucleus);GO:0005737(cytoplasm);GO:0006470(protein dephosphorylation);GO:0008138(protein tyrosine/serine/threonine phosphatase activity);GO:0016311(dephosphorylation);GO:0016787(hydrolase activity);GO:0016791(phosphatase activity);GO:0017017(MAP kin…	04010(MAPK signaling pathway)	K04459	3.1.3.48;EC:3.1.3.16
2	ENSDARG00000015149	wasa	3.36109	2.01062	0.741287	9.72253e-11	2.37142e-06	Wiskott-Aldrich syndrome (eczema-thrombocytopenia) a [Source:ZFIN;Acc:ZDB-GENE-081104-419]	GO:0000147(actin cortical patch assembly);GO:0003779(actin binding);GO:0005884(actin filament);GO:0006897(endocytosis);GO:0007015(actin filament organization);GO:0030048(actin filament-based movement);GO:0030479(actin cortical patch);GO:0051015(actin filament binding);GO:0051127(positive regulation of actin nucleation);GO:0051666(actin cortical patch localization);GO:2000601(positive regulation o…	04144(Endocytosis);04520(Adherens junction);04530(Tight junction);04810(Regulation of actin cytoskeleton);05132(Salmonella infection)	K05747	NA
2	ENSDARG00000040001	fryl	1.29688	0.78713	0.720377	9.92679e-11	2.42124e-06	furry homolog, like [Source:ZFIN;Acc:ZDB-GENE-040914-58]	GO:0000902(cell morphogenesis);GO:0005938(cell cortex);GO:0007507(heart development);GO:0031175(neuron projection development)	NA	NA	NA
2	ENSDARG00000060316	cish	0.987759	0.596661	0.727248	1.1233e-10	2.73984e-06	cytokine inducible SH2-containing protein [Source:ZFIN;Acc:ZDB-GENE-050907-1]	GO:0005942(phosphatidylinositol 3-kinase complex);GO:0016567(protein ubiquitination);GO:0035556(intracellular signal transduction);GO:0043551(regulation of phosphatidylinositol 3-kinase activity);GO:0045620(negative regulation of lymphocyte differentiation);GO:0045638(negative regulation of myeloid cell differentiation);GO:0045647(negative regulation of erythrocyte differentiation);GO:0046426(neg…	NA	K04701	NA
2	ENSDARG00000039914	gapdhs	11.7676	8.83514	0.41349	1.25797e-10	3.06831e-06	glyceraldehyde-3-phosphate dehydrogenase, spermatogenic [Source:ZFIN;Acc:ZDB-GENE-020913-1]	GO:0000166(nucleotide binding);GO:0004365(glyceraldehyde-3-phosphate dehydrogenase (NAD+) (phosphorylating) activity);GO:0006006(glucose metabolic process);GO:0006096(glycolytic process);GO:0016491(oxidoreductase activity);GO:0016620(oxidoreductase activity, acting on the aldehyde or oxo group of donors, NAD or NADP as acceptor);GO:0050661(NADP binding);GO:0051287(NAD binding);GO:0055114(oxidatio…	00010(Glycolysis / Gluconeogenesis)	K10705	EC:1.2.1.12
2	ENSDARG00000076889	ralgapa1	0.840378	0.542921	0.630296	1.4566e-10	3.5528e-06	Ral GTPase activating protein, alpha subunit 1 (catalytic) [Source:ZFIN;Acc:ZDB-GENE-080806-1]	GO:0005096(GTPase activator activity);GO:0005634(nucleus);GO:0005737(cytoplasm);GO:0007420(brain development);GO:0043547(positive regulation of GTPase activity);GO:0051056(regulation of small GTPase mediated signal transduction)	NA	NA	NA
2	ENSDARG00000062352	sema4ab	1.98057	1.06898	0.889674	1.62937e-10	3.97418e-06	sema domain, immunoglobulin domain (Ig), transmembrane domain (TM) and short cytoplasmic domain, (semaphorin) 4Ab [Source:ZFIN;Acc:ZDB-GENE-060503-363]	GO:0001755(neural crest cell migration);GO:0005515(protein binding);GO:0005615(extracellular space);GO:0005887(integral component of plasma membrane);GO:0016020(membrane);GO:0016021(integral component of membrane);GO:0030215(semaphorin receptor binding);GO:0030335(positive regulation of cell migration);GO:0038191(neuropilin binding);GO:0045499(chemorepellent activity);GO:0048843(negative regulati…	NA	NA	NA
2	ENSDARG00000100577	CU694481.1	0.469839	0.335745	0.484802	1.91385e-10	4.66806e-06	NA	NA	NA	NA	NA
2	ENSDARG00000053291	pnrc2	69.8487	51.8434	0.430073	2.07374e-10	5.05807e-06	proline-rich nuclear receptor coactivator 2 [Source:ZFIN;Acc:ZDB-GENE-030131-5475]	GO:0000184(nuclear-transcribed mRNA catabolic process, nonsense-mediated decay);GO:0000932(P-body);GO:0000956(nuclear-transcribed mRNA catabolic process);GO:0005634(nucleus);GO:0005737(cytoplasm)	NA	K18751	NA
2	ENSDARG00000015978	COX5B	4.50534	3.12936	0.525766	2.15576e-10	5.25813e-06	zgc:86599 [Source:ZFIN;Acc:ZDB-GENE-040625-180]	GO:0004129(cytochrome-c oxidase activity);GO:0005740(mitochondrial envelope);GO:0006123(mitochondrial electron transport, cytochrome c to oxygen);GO:0042776(mitochondrial ATP synthesis coupled proton transport)	00190(Oxidative phosphorylation);04260(Cardiac muscle contraction)	K02265	NA
2	ENSDARG00000044561	ccr7	0.544496	0.375608	0.535694	3.3152e-10	8.0861e-06	chemokine (C-C motif) receptor 7 [Source:ZFIN;Acc:ZDB-GENE-060522-2]	GO:0004930(G protein-coupled receptor activity);GO:0004950(chemokine receptor activity);GO:0006935(chemotaxis);GO:0006955(immune response);GO:0007165(signal transduction);GO:0007186(G protein-coupled receptor signaling pathway);GO:0007204(positive regulation of cytosolic calcium ion concentration);GO:0009897(external side of plasma membrane);GO:0009953(dorsal/ventral pattern formation);GO:0016020…	04060(Cytokine-cytokine receptor interaction)	K04182	NA
2	ENSDARG00000026629	gmds	1.94998	1.13114	0.785685	3.92964e-10	9.58477e-06	GDP-mannose 4,6-dehydratase [Source:ZFIN;Acc:ZDB-GENE-050419-45]	GO:0005575(cellular_component);GO:0005737(cytoplasm);GO:0007219(Notch signaling pathway);GO:0008417(fucosyltransferase activity);GO:0008446(GDP-mannose 4,6-dehydratase activity);GO:0010842(retina layer formation);GO:0019673(GDP-mannose metabolic process);GO:0021564(vagus nerve development);GO:0021744(dorsal motor nucleus of vagus nerve development);GO:0036065(fucosylation);GO:0042351('de novo' GD…	00051(Fructose and mannose metabolism);00520(Amino sugar and nucleotide sugar metabolism)	K01711	EC:4.2.1.47
2	ENSDARG00000042322	si:dkey-177p2.6	2.65458	1.64865	0.687198	5.18325e-10	1.26425e-05	si:dkey-177p2.6 [Source:ZFIN;Acc:ZDB-GENE-030131-5926]	GO:0003674(molecular_function);GO:0005575(cellular_component);GO:0008150(biological_process)	NA	NA	NA
2	ENSDARG00000058820	bin1b	0.447673	0.322483	0.473223	5.56571e-10	1.35753e-05	bridging integrator 1b [Source:ZFIN;Acc:ZDB-GENE-030425-1]	GO:0005515(protein binding);GO:0005543(phospholipid binding);GO:0005737(cytoplasm);GO:0005886(plasma membrane);GO:0008021(synaptic vesicle);GO:0030100(regulation of endocytosis);GO:0048156(tau protein binding);GO:0060048(cardiac muscle contraction)	04144(Endocytosis)	K12562	NA
2	ENSDARG00000009950	edf1	4.39022	2.83441	0.631246	8.0972e-10	1.97499e-05	endothelial differentiation-related factor 1 [Source:ZFIN;Acc:ZDB-GENE-040426-1710]	GO:0003677(DNA binding);GO:0005634(nucleus);GO:0043565(sequence-specific DNA binding)	NA	K03627	NA
2	ENSDARG00000100499	cpeb4b	2.70885	1.56076	0.795432	8.89142e-10	2.16871e-05	cytoplasmic polyadenylation element binding protein 4b [Source:ZFIN;Acc:ZDB-GENE-170601-167]	GO:0000900(translation repressor activity, mRNA regulatory element binding);GO:0003676(nucleic acid binding);GO:0003723(RNA binding);GO:0003730(mRNA 3'-UTR binding);GO:0005634(nucleus);GO:0005737(cytoplasm);GO:0006412(translation);GO:0006417(regulation of translation);GO:0008135(translation factor activity, RNA binding);GO:0043005(neuron projection);GO:0043022(ribosome binding);GO:0045182(transla…	04114(Oocyte meiosis);04914(Progesterone-mediated oocyte maturation)	K02602	NA
2	ENSDARG00000016255	chmp4ba	9.5763	6.23336	0.619459	8.93989e-10	2.18053e-05	charged multivesicular body protein 4Ba [Source:ZFIN;Acc:ZDB-GENE-040426-906]	GO:0007034(vacuolar transport)	04144(Endocytosis);04217(Necroptosis)	K12194	NA
2	ENSDARG00000094730	acbd7	0.681259	0.465206	0.550332	9.24089e-10	2.25395e-05	acyl-CoA binding domain containing 7 [Source:ZFIN;Acc:ZDB-GENE-050913-108]	GO:0000062(fatty-acyl-CoA binding);GO:0005575(cellular_component);GO:0008150(biological_process)	NA	NA	NA
2	ENSDARG00000099186	slc1a5	3.03264	1.75004	0.793183	9.65335e-10	2.35455e-05	solute carrier family 1 (neutral amino acid transporter), member 5 [Source:ZFIN;Acc:ZDB-GENE-070501-4]	GO:0015293(symporter activity);GO:0016020(membrane);GO:0016021(integral component of membrane);GO:0055085(transmembrane transport)	NA	K05616	NA
2	ENSDARG00000079434	tmem131l	2.31703	1.37097	0.757085	1.25822e-09	3.06893e-05	transmembrane 131 like [Source:ZFIN;Acc:ZDB-GENE-030131-6110]	NA	NA	NA	NA
2	ENSDARG00000071395	camk2g1	0.624172	0.491349	0.345194	1.45663e-09	3.55287e-05	calcium/calmodulin-dependent protein kinase (CaM kinase) II gamma 1 [Source:ZFIN;Acc:ZDB-GENE-050913-146]	GO:0003146(heart jogging);GO:0004672(protein kinase activity);GO:0004674(protein serine/threonine kinase activity);GO:0004683(calmodulin-dependent protein kinase activity);GO:0005516(calmodulin binding);GO:0005524(ATP binding);GO:0005737(cytoplasm);GO:0006468(protein phosphorylation);GO:0016301(kinase activity);GO:0016310(phosphorylation);GO:0043005(neuron projection);GO:0046777(protein autophosp…	04012(ErbB signaling pathway);04020(Calcium signaling pathway);04114(Oocyte meiosis);04217(Necroptosis);04261(Adrenergic signaling in cardiomyocytes);04310(Wnt signaling pathway);04912(GnRH signaling pathway);04916(Melanogenesis)	K04515	EC:2.7.11.17
2	ENSDARG00000068214	ccni	10.5448	6.98414	0.594371	1.47912e-09	3.60771e-05	cyclin I [Source:ZFIN;Acc:ZDB-GENE-040426-2898]	GO:0000079(regulation of cyclin-dependent protein serine/threonine kinase activity);GO:0000278(mitotic cell cycle);GO:0000307(cyclin-dependent protein kinase holoenzyme complex);GO:0003674(molecular_function);GO:0004672(protein kinase activity);GO:0005575(cellular_component);GO:0005634(nucleus);GO:0005737(cytoplasm);GO:0006468(protein phosphorylation);GO:0007088(regulation of mitotic nuclear divi…	NA	NA	NA
2	ENSDARG00000006921	lrp5	0.233095	0.191853	0.280917	1.53833e-09	3.75213e-05	low density lipoprotein receptor-related protein 5 [Source:ZFIN;Acc:ZDB-GENE-050518-2]	GO:0001755(neural crest cell migration);GO:0001889(liver development);GO:0005515(protein binding);GO:0005886(plasma membrane);GO:0007605(sensory perception of sound);GO:0016020(membrane);GO:0016021(integral component of membrane);GO:0017147(Wnt-protein binding);GO:0032474(otolith morphogenesis);GO:0035676(anterior lateral line neuromast hair cell development);GO:0035677(posterior lateral line neu…	04150(mTOR signaling pathway);04310(Wnt signaling pathway)	K03068	NA
2	ENSDARG00000034187	calm1b	10.5079	6.65755	0.65841	1.66934e-09	4.07169e-05	calmodulin 1b [Source:ZFIN;Acc:ZDB-GENE-030804-2]	GO:0005509(calcium ion binding);GO:0019722(calcium-mediated signaling);GO:0046872(metal ion binding)	04020(Calcium signaling pathway);04070(Phosphatidylinositol signaling system);04114(Oocyte meiosis);04218(Cellular senescence);04261(Adrenergic signaling in cardiomyocytes);04270(Vascular smooth muscle contraction);04371(Apelin signaling pathway);04625(C-type lectin receptor signaling pathway);04744(Phototransduction);04910(Insulin signaling pathway);04912(GnRH signaling pathway);04916(Melanogene…	K02183	NA
2	ENSDARG00000104077	fcer1gl	0.990782	0.73781	0.425319	1.78013e-09	4.3419e-05	Fc receptor, IgE, high affinity I, gamma polypeptide like [Source:ZFIN;Acc:ZDB-GENE-070502-4]	GO:0016020(membrane);GO:0016021(integral component of membrane)	NA	NA	NA
2	ENSDARG00000104325	plek	1.02976	0.637636	0.691501	1.82856e-09	4.46005e-05	pleckstrin [Source:ZFIN;Acc:ZDB-GENE-040426-1506]	GO:0005886(plasma membrane);GO:0031532(actin cytoskeleton reorganization);GO:0035556(intracellular signal transduction)	NA	K19993	NA
2	ENSDARG00000077864	rasgrp3	0.990864	0.653545	0.600401	1.91445e-09	4.66953e-05	RAS guanyl releasing protein 3 (calcium and DAG-regulated) [Source:ZFIN;Acc:ZDB-GENE-070424-82]	GO:0005085(guanyl-nucleotide exchange factor activity);GO:0005096(GTPase activator activity);GO:0005509(calcium ion binding);GO:0005622(intracellular);GO:0007264(small GTPase mediated signal transduction);GO:0007265(Ras protein signal transduction);GO:0035556(intracellular signal transduction);GO:0043087(regulation of GTPase activity);GO:0043547(positive regulation of GTPase activity);GO:0046872(…	04010(MAPK signaling pathway)	K12362	NA
2	ENSDARG00000009830	hdlbpa	2.24331	1.34699	0.73589	1.94021e-09	4.73237e-05	high density lipoprotein binding protein a [Source:ZFIN;Acc:ZDB-GENE-030131-2032]	GO:0003676(nucleic acid binding);GO:0003723(RNA binding);GO:0071391(cellular response to estrogen stimulus)	NA	NA	NA
2	ENSDARG00000099672	capgb	2.66037	1.57925	0.752391	1.9526e-09	4.76258e-05	capping protein (actin filament), gelsolin-like b [Source:ZFIN;Acc:ZDB-GENE-030131-8541]	GO:0005575(cellular_component);GO:0051015(actin filament binding);GO:0051016(barbed-end actin filament capping)	NA	K10368	NA
2	ENSDARG00000038010	rac2	4.20191	2.73386	0.620107	2.49458e-09	6.08454e-05	Rac family small GTPase 2 [Source:ZFIN;Acc:ZDB-GENE-040625-27]	GO:0000166(nucleotide binding);GO:0001780(neutrophil homeostasis);GO:0002446(neutrophil mediated immunity);GO:0002685(regulation of leukocyte migration);GO:0003924(GTPase activity);GO:0005525(GTP binding);GO:0005622(intracellular);GO:0005737(cytoplasm);GO:0005886(plasma membrane);GO:0007264(small GTPase mediated signal transduction);GO:0007266(Rho protein signal transduction);GO:0008045(motor neu…	04010(MAPK signaling pathway);04310(Wnt signaling pathway);04370(VEGF signaling pathway);04510(Focal adhesion);04520(Adherens junction);04810(Regulation of actin cytoskeleton)	K07860	NA
2	ENSDARG00000057867	lasp1	4.99422	3.22094	0.632776	3.06166e-09	7.4677e-05	LIM and SH3 protein 1 [Source:ZFIN;Acc:ZDB-GENE-030131-1936]	GO:0005515(protein binding);GO:0046872(metal ion binding)	NA	NA	NA
2	ENSDARG00000102076	spink2.1	1.38115	0.846859	0.705679	3.21195e-09	7.83426e-05	serine peptidase inhibitor, Kazal type 2, tandem duplicate 1 [Source:ZFIN;Acc:ZDB-GENE-070112-972]	GO:0004867(serine-type endopeptidase inhibitor activity);GO:0005515(protein binding);GO:0010951(negative regulation of endopeptidase activity)	NA	NA	NA
2	ENSDARG00000090159	BX005105.1	1.92158	1.07279	0.840925	4.22795e-09	0.000103124	lysosomal associated membrane protein 3 [Source:NCBI gene;Acc:100003043]	NA	NA	NA	NA
2	ENSDARG00000015922	stk17al	9.68053	6.05873	0.676071	4.24593e-09	0.000103562	serine/threonine kinase 17a like [Source:ZFIN;Acc:ZDB-GENE-061103-427]	GO:0004672(protein kinase activity);GO:0004674(protein serine/threonine kinase activity);GO:0005524(ATP binding);GO:0005634(nucleus);GO:0006468(protein phosphorylation)	NA	K08804	EC:2.7.11.1
2	ENSDARG00000021113	ptmaa	16.3958	11.0594	0.568061	4.88554e-09	0.000119163	prothymosin alpha a [Source:ZFIN;Acc:ZDB-GENE-030131-7647]	NA	NA	K13784	NA
2	ENSDARG00000100515	dusp1	4.67102	2.67573	0.803805	5.02749e-09	0.000122626	dual specificity phosphatase 1 [Source:ZFIN;Acc:ZDB-GENE-040426-2018]	GO:0000188(inactivation of MAPK activity);GO:0004721(phosphoprotein phosphatase activity);GO:0004725(protein tyrosine phosphatase activity);GO:0005634(nucleus);GO:0005737(cytoplasm);GO:0006470(protein dephosphorylation);GO:0008138(protein tyrosine/serine/threonine phosphatase activity);GO:0016311(dephosphorylation);GO:0016787(hydrolase activity);GO:0016791(phosphatase activity);GO:0017017(MAP kin…	04010(MAPK signaling pathway)	K21278	3.1.3.48;EC:3.1.3.16
2	ENSDARG00000054578	arl6ip1	3.42518	2.24013	0.612595	5.56339e-09	0.000135697	ADP-ribosylation factor-like 6 interacting protein 1 [Source:ZFIN;Acc:ZDB-GENE-040426-1087]	GO:0001755(neural crest cell migration);GO:0005515(protein binding);GO:0005784(Sec61 translocon complex);GO:0006613(cotranslational protein targeting to membrane);GO:0014032(neural crest cell development);GO:0016020(membrane);GO:0016021(integral component of membrane);GO:0060042(retina morphogenesis in camera-type eye)	NA	NA	NA
2	ENSDARG00000011909	itpr2	0.371189	0.297139	0.321013	5.92232e-09	0.000144451	inositol 1,4,5-trisphosphate receptor, type 2 [Source:ZFIN;Acc:ZDB-GENE-050419-192]	GO:0005220(inositol 1,4,5-trisphosphate-sensitive calcium-release channel activity);GO:0005262(calcium channel activity);GO:0005509(calcium ion binding);GO:0005783(endoplasmic reticulum);GO:0005789(endoplasmic reticulum membrane);GO:0005886(plasma membrane);GO:0006816(calcium ion transport);GO:0016020(membrane);GO:0016529(sarcoplasmic reticulum);GO:0030659(cytoplasmic vesicle membrane);GO:0030667…	04020(Calcium signaling pathway);04070(Phosphatidylinositol signaling system);04114(Oocyte meiosis);04210(Apoptosis);04218(Cellular senescence);04270(Vascular smooth muscle contraction);04371(Apelin signaling pathway);04540(Gap junction);04621(NOD-like receptor signaling pathway);04625(C-type lectin receptor signaling pathway);04912(GnRH signaling pathway)	K04959	NA
2	ENSDARG00000040988	tpi1b	8.61586	5.85797	0.556594	6.42992e-09	0.000156832	triosephosphate isomerase 1b [Source:ZFIN;Acc:ZDB-GENE-020416-4]	GO:0003824(catalytic activity);GO:0004807(triose-phosphate isomerase activity);GO:0006094(gluconeogenesis);GO:0006096(glycolytic process);GO:0016853(isomerase activity)	00010(Glycolysis / Gluconeogenesis);00051(Fructose and mannose metabolism);00562(Inositol phosphate metabolism)	K01803	EC:5.3.1.1
2	ENSDARG00000039007	eno3	8.14568	5.16115	0.658342	6.96701e-09	0.000169932	enolase 3, (beta, muscle) [Source:ZFIN;Acc:ZDB-GENE-031006-5]	GO:0000015(phosphopyruvate hydratase complex);GO:0000287(magnesium ion binding);GO:0004634(phosphopyruvate hydratase activity);GO:0006096(glycolytic process)	00010(Glycolysis / Gluconeogenesis);03018(RNA degradation)	K01689	EC:4.2.1.11
2	ENSDARG00000037154	hivep3b	0.458935	0.33403	0.458311	8.3685e-09	0.000204116	human immunodeficiency virus type I enhancer binding protein 3b [Source:ZFIN;Acc:ZDB-GENE-100922-42]	GO:0003676(nucleic acid binding);GO:0008270(zinc ion binding);GO:0046872(metal ion binding)	NA	K09239	NA
2	ENSDARG00000099441	cbx4	0.37905	0.280943	0.432112	9.86789e-09	0.000240688	chromobox homolog 4 (Pc class homolog, Drosophila) [Source:ZFIN;Acc:ZDB-GENE-040329-2]	GO:0005634(nucleus)	NA	K11452	EC:2.3.2.-
2	ENSDARG00000031745	si:busm1-266f07.2	8.11373	5.10228	0.669223	1.0262e-08	0.000250301	si:busm1-266f07.2 [Source:ZFIN;Acc:ZDB-GENE-030616-436]	GO:0006955(immune response);GO:0016020(membrane);GO:0016021(integral component of membrane);GO:0019882(antigen processing and presentation);GO:0042613(MHC class II protein complex)	04145(Phagosome);04514(Cell adhesion molecules (CAMs));04672(Intestinal immune network for IgA production);05168(Herpes simplex virus 1 infection)	K06752	NA
2	ENSDARG00000105287	mpp1	4.29587	2.72101	0.658809	1.08814e-08	0.000265407	membrane protein, palmitoylated 1 [Source:ZFIN;Acc:ZDB-GENE-031113-4]	GO:0005515(protein binding)	NA	K21880	NA
2	ENSDARG00000057353	ehbp1l1a	0.524078	0.368829	0.506828	1.14881e-08	0.000280207	EH domain binding protein 1-like 1a [Source:ZFIN;Acc:ZDB-GENE-080917-27]	GO:0003674(molecular_function);GO:0005515(protein binding);GO:0005575(cellular_component);GO:0008150(biological_process)	NA	NA	NA
2	ENSDARG00000069920	cox17	2.39003	1.52311	0.650007	1.31079e-08	0.000319714	cytochrome c oxidase copper chaperone COX17 [Source:ZFIN;Acc:ZDB-GENE-040912-91]	GO:0005507(copper ion binding);GO:0005758(mitochondrial intermembrane space);GO:0006825(copper ion transport);GO:0016531(copper chaperone activity);GO:0033617(mitochondrial respiratory chain complex IV assembly);GO:0046688(response to copper ion)	00190(Oxidative phosphorylation)	K02260	NA
2	ENSDARG00000042332	plin2	6.91856	3.89089	0.830372	1.31214e-08	0.000320043	perilipin 2 [Source:ZFIN;Acc:ZDB-GENE-050913-12]	GO:0003674(molecular_function);GO:0005575(cellular_component);GO:0008150(biological_process)	03320(PPAR signaling pathway)	K17284	NA
2	ENSDARG00000045681	irf5	0.312121	0.247726	0.333357	1.53068e-08	0.000373349	interferon regulatory factor 5 [Source:ZFIN;Acc:ZDB-GENE-040426-2587]	GO:0000981(DNA-binding transcription factor activity, RNA polymerase II-specific);GO:0002376(immune system process);GO:0003700(DNA-binding transcription factor activity);GO:0005515(protein binding);GO:0005634(nucleus);GO:0006355(regulation of transcription, DNA-templated);GO:0006357(regulation of transcription by RNA polymerase II);GO:0019221(cytokine-mediated signaling pathway);GO:0044212(transc…	04620(Toll-like receptor signaling pathway)	K09446	NA
2	ENSDARG00000062082	hipk3b	0.676919	0.463974	0.54494	1.70556e-08	0.000416004	homeodomain interacting protein kinase 3b [Source:ZFIN;Acc:ZDB-GENE-030131-82]	GO:0004672(protein kinase activity);GO:0005524(ATP binding);GO:0006468(protein phosphorylation)	04218(Cellular senescence)	K08826	EC:2.7.11.1
2	ENSDARG00000060072	abi3a	1.15999	0.76573	0.599198	1.80533e-08	0.000440338	ABI family, member 3a [Source:ZFIN;Acc:ZDB-GENE-060929-958]	GO:0005515(protein binding);GO:0008150(biological_process);GO:0017124(SH3 domain binding);GO:0030027(lamellipodium)	NA	NA	NA
2	ENSDARG00000035859	angptl4	1.37136	0.84943	0.691043	2.05051e-08	0.000500139	angiopoietin-like 4 [Source:ZFIN;Acc:ZDB-GENE-041111-222]	GO:0001525(angiogenesis);GO:0005615(extracellular space);GO:0009617(response to bacterium);GO:0043066(negative regulation of apoptotic process);GO:1902262(apoptotic process involved in blood vessel morphogenesis)	03320(PPAR signaling pathway)	K08767	NA
2	ENSDARG00000087647	sept7a	1.87616	1.17023	0.680994	2.16847e-08	0.000528911	septin 7a [Source:ZFIN;Acc:ZDB-GENE-040426-1008]	GO:0000166(nucleotide binding);GO:0003924(GTPase activity);GO:0005525(GTP binding);GO:0005940(septin ring);GO:0015630(microtubule cytoskeleton);GO:0031105(septin complex);GO:0032947(protein-containing complex scaffold activity);GO:0060271(cilium assembly);GO:0061640(cytoskeleton-dependent cytokinesis)	NA	NA	NA
2	ENSDARG00000055115	dtnbp1a	1.57866	0.987188	0.677305	2.42123e-08	0.000590562	dystrobrevin binding protein 1a [Source:ZFIN;Acc:ZDB-GENE-040426-1036]	GO:0005737(cytoplasm)	NA	K20189	NA
2	ENSDARG00000024746	hsp90aa1.2	4.38377	1.96839	1.15516	2.46829e-08	0.00060204	heat shock protein 90, alpha (cytosolic), class A member 1, tandem duplicate 2 [Source:ZFIN;Acc:ZDB-GENE-031001-3]	GO:0005515(protein binding);GO:0005524(ATP binding);GO:0005634(nucleus);GO:0005737(cytoplasm);GO:0005829(cytosol);GO:0005886(plasma membrane);GO:0006457(protein folding);GO:0009408(response to heat);GO:0009409(response to cold);GO:0009986(cell surface);GO:0032991(protein-containing complex);GO:0034605(cellular response to heat);GO:0042803(protein homodimerization activity);GO:0043025(neuronal cel…	04141(Protein processing in endoplasmic reticulum);04217(Necroptosis);04621(NOD-like receptor signaling pathway);04914(Progesterone-mediated oocyte maturation)	K04079	NA
2	ENSDARG00000101406	rplp2	49.1288	39.406	0.318152	2.65536e-08	0.000647669	ribosomal protein, large P2 [Source:ZFIN;Acc:ZDB-GENE-031018-2]	GO:0003735(structural constituent of ribosome);GO:0005622(intracellular);GO:0005840(ribosome);GO:0006414(translational elongation)	03010(Ribosome)	K02943	NA
2	ENSDARG00000086712	si:dkeyp-97b10.3	0.365153	0.278299	0.391867	2.69754e-08	0.000657956	si:dkeyp-97b10.3 [Source:ZFIN;Acc:ZDB-GENE-131121-429]	GO:0000347(THO complex);GO:0000445(THO complex part of transcription export complex);GO:0005515(protein binding);GO:0005634(nucleus);GO:0006406(mRNA export from nucleus);GO:0007165(signal transduction);GO:0032784(regulation of DNA-templated transcription, elongation)	NA	NA	NA
2	ENSDARG00000068992	hspa8	27.156	20.7073	0.391135	2.77203e-08	0.000676126	heat shock protein 8 [Source:ZFIN;Acc:ZDB-GENE-990415-92]	GO:0000166(nucleotide binding);GO:0005524(ATP binding)	03040(Spliceosome);04010(MAPK signaling pathway);04141(Protein processing in endoplasmic reticulum);04144(Endocytosis)	K03283	NA
2	ENSDARG00000011334	ncaldb	3.09988	2.17451	0.511523	2.84681e-08	0.000694364	neurocalcin delta b [Source:ZFIN;Acc:ZDB-GENE-040808-37]	GO:0005509(calcium ion binding);GO:0005575(cellular_component);GO:0046872(metal ion binding);GO:0048841(regulation of axon extension involved in axon guidance)	NA	NA	NA
2	ENSDARG00000086856	stk35	0.671711	0.467824	0.521876	2.96332e-08	0.000722784	serine/threonine kinase 35 [Source:ZFIN;Acc:ZDB-GENE-061103-553]	GO:0000166(nucleotide binding);GO:0004672(protein kinase activity);GO:0004674(protein serine/threonine kinase activity);GO:0005524(ATP binding);GO:0005575(cellular_component);GO:0005634(nucleus);GO:0006468(protein phosphorylation);GO:0051321(meiotic cell cycle)	NA	K08859	EC:2.7.11.1
2	ENSDARG00000000906	skap2	1.11651	0.75064	0.572804	3.6333e-08	0.000886199	src kinase associated phosphoprotein 2 [Source:ZFIN;Acc:ZDB-GENE-030616-438]	GO:0005515(protein binding);GO:0005737(cytoplasm);GO:0005886(plasma membrane);GO:0042113(B cell activation)	NA	NA	NA
2	ENSDARG00000014727	acox1	0.619579	0.436365	0.505752	3.66e-08	0.00089271	acyl-CoA oxidase 1, palmitoyl [Source:ZFIN;Acc:ZDB-GENE-041010-219]	GO:0000038(very long-chain fatty acid metabolic process);GO:0003997(acyl-CoA oxidase activity);GO:0005504(fatty acid binding);GO:0005777(peroxisome);GO:0006631(fatty acid metabolic process);GO:0006635(fatty acid beta-oxidation);GO:0016401(palmitoyl-CoA oxidase activity);GO:0016627(oxidoreductase activity, acting on the CH-CH group of donors);GO:0033540(fatty acid beta-oxidation using acyl-CoA oxi…	00071(Fatty acid degradation);00592(alpha-Linolenic acid metabolism);01040(Biosynthesis of unsaturated fatty acids);03320(PPAR signaling pathway);04146(Peroxisome)	K00232	EC:1.3.3.6
2	ENSDARG00000035136	selenow1	5.31595	3.58174	0.569664	4.13419e-08	0.00100837	selenoprotein W, 1 [Source:ZFIN;Acc:ZDB-GENE-030410-5]	NA	NA	NA	NA
2	ENSDARG00000053129	carhsp1	0.748487	0.514192	0.541669	4.25169e-08	0.00103703	calcium regulated heat stable protein 1 [Source:ZFIN;Acc:ZDB-GENE-040426-1479]	GO:0003676(nucleic acid binding);GO:0003730(mRNA 3'-UTR binding);GO:0005737(cytoplasm);GO:0043488(regulation of mRNA stability)	NA	NA	NA
2	ENSDARG00000034801	mylka	0.486874	0.350245	0.475184	4.74318e-08	0.00115691	myosin, light chain kinase a [Source:ZFIN;Acc:ZDB-GENE-030131-8207]	GO:0004672(protein kinase activity);GO:0005515(protein binding);GO:0005524(ATP binding);GO:0005865(striated muscle thin filament);GO:0006468(protein phosphorylation);GO:0006936(muscle contraction);GO:0007596(blood coagulation);GO:0008307(structural constituent of muscle);GO:0016301(kinase activity);GO:0016310(phosphorylation);GO:0030017(sarcomere);GO:0030018(Z disc);GO:0030240(skeletal muscle thi…	NA	NA	NA
2	ENSDARG00000056725	hmgb3a	1.17114	0.720853	0.700131	5.10971e-08	0.00124631	high mobility group box 3a [Source:ZFIN;Acc:ZDB-GENE-050428-1]	GO:0000790(nuclear chromatin);GO:0003677(DNA binding);GO:0005634(nucleus);GO:0005737(cytoplasm);GO:0006310(DNA recombination);GO:0006338(chromatin remodeling);GO:0006357(regulation of transcription by RNA polymerase II);GO:0008134(transcription factor binding);GO:0008301(DNA binding, bending);GO:0045089(positive regulation of innate immune response);GO:0045944(positive regulation of transcription…	NA	K11296	NA
2	ENSDARG00000036489	zgc:112356	0.961994	0.619205	0.635611	6.83675e-08	0.00166755	zgc:112356 [Source:ZFIN;Acc:ZDB-GENE-050913-28]	GO:0000994(RNA polymerase III core binding);GO:0001030(RNA polymerase III type 1 promoter DNA binding);GO:0001031(RNA polymerase III type 2 promoter DNA binding);GO:0001032(RNA polymerase III type 3 promoter DNA binding);GO:0005634(nucleus);GO:0005737(cytoplasm);GO:0016480(negative regulation of transcription by RNA polymerase III)	NA	NA	NA
2	ENSDARG00000098941	CU856520.1	0.560431	0.406995	0.461527	7.25555e-08	0.0017697	NA	NA	NA	NA	NA
2	ENSDARG00000057882	arpc3	3.83939	2.58392	0.571315	7.85075e-08	0.00191488	actin related protein 2/3 complex, subunit 3 [Source:ZFIN;Acc:ZDB-GENE-040625-107]	GO:0003779(actin binding);GO:0005737(cytoplasm);GO:0005856(cytoskeleton);GO:0005885(Arp2/3 protein complex);GO:0030833(regulation of actin filament polymerization);GO:0034314(Arp2/3 complex-mediated actin nucleation);GO:0051015(actin filament binding)	04144(Endocytosis);04810(Regulation of actin cytoskeleton);05132(Salmonella infection)	K05756	NA
2	ENSDARG00000023290	fabp3	4.88563	3.03263	0.687978	7.89268e-08	0.0019251	fatty acid binding protein 3, muscle and heart [Source:ZFIN;Acc:ZDB-GENE-020318-2]	GO:0001947(heart looping);GO:0007507(heart development);GO:0008289(lipid binding);GO:0043009(chordate embryonic development)	03320(PPAR signaling pathway)	K08752	NA
2	ENSDARG00000075014	sqstm1	3.79002	2.94428	0.364292	8.09129e-08	0.00197355	sequestosome 1 [Source:ZFIN;Acc:ZDB-GENE-040426-2204]	GO:0000423(mitophagy);GO:0005080(protein kinase C binding);GO:0005515(protein binding);GO:0005776(autophagosome);GO:0007005(mitochondrion organization);GO:0007032(endosome organization);GO:0007409(axonogenesis);GO:0007626(locomotory behavior);GO:0008270(zinc ion binding);GO:0010506(regulation of autophagy);GO:0016235(aggresome);GO:0035973(aggrephagy);GO:0044753(amphisome);GO:0046872(metal ion bin…	04137(Mitophagy - animal);04217(Necroptosis);04218(Cellular senescence)	K14381	NA
2	ENSDARG00000032970	cox4i1	8.08167	5.94183	0.443747	8.52968e-08	0.00208047	cytochrome c oxidase subunit 4I1 [Source:ZFIN;Acc:ZDB-GENE-030131-5175]	GO:0001666(response to hypoxia);GO:0004129(cytochrome-c oxidase activity);GO:0005751(mitochondrial respiratory chain complex IV);GO:0006123(mitochondrial electron transport, cytochrome c to oxygen);GO:0016020(membrane);GO:0016021(integral component of membrane);GO:1902600(proton transmembrane transport)	00190(Oxidative phosphorylation);04260(Cardiac muscle contraction)	K02263	NA
2	ENSDARG00000036136	tipin	0.329184	0.254646	0.370399	9.03697e-08	0.00220421	timeless interacting protein [Source:ZFIN;Acc:ZDB-GENE-040801-189]	GO:0000076(DNA replication checkpoint);GO:0005634(nucleus);GO:0006974(cellular response to DNA damage stimulus);GO:0048478(replication fork protection)	NA	K10904	NA
2	ENSDARG00000094770	CT583625.2	0.240807	0.197846	0.283497	1.00905e-07	0.00246117	uncharacterized LOC108181196 [Source:NCBI gene;Acc:108181196]	GO:0016020(membrane);GO:0016021(integral component of membrane)	NA	NA	NA
2	ENSDARG00000032553	egln3	1.42797	0.875624	0.705586	1.02497e-07	0.00250002	egl-9 family hypoxia-inducible factor 3 [Source:ZFIN;Acc:ZDB-GENE-040426-2541]	GO:0005506(iron ion binding);GO:0016491(oxidoreductase activity);GO:0016705(oxidoreductase activity, acting on paired donors, with incorporation or reduction of molecular oxygen);GO:0031418(L-ascorbic acid binding);GO:0046872(metal ion binding);GO:0055114(oxidation-reduction process)	NA	NA	NA
2	ENSDARG00000102744	mgst3a	1.09573	0.767428	0.513784	1.08249e-07	0.00264031	microsomal glutathione S-transferase 3a [Source:ZFIN;Acc:ZDB-GENE-040426-2767]	GO:0004364(glutathione transferase activity);GO:0004602(glutathione peroxidase activity);GO:0005635(nuclear envelope);GO:0005783(endoplasmic reticulum);GO:0016020(membrane);GO:0016021(integral component of membrane);GO:0098869(cellular oxidant detoxification)	00480(Glutathione metabolism);00980(Metabolism of xenobiotics by cytochrome P450);00982(Drug metabolism - cytochrome P450);00983(Drug metabolism - other enzymes)	K00799	EC:2.5.1.18
2	ENSDARG00000104408	zgc:152774	1.32595	0.881538	0.588932	1.37627e-07	0.00335685	zgc:152774 [Source:ZFIN;Acc:ZDB-GENE-060929-544]	GO:0005575(cellular_component);GO:0008150(biological_process);GO:0008270(zinc ion binding)	NA	NA	NA
2	ENSDARG00000038900	acadm	1.54752	1.03171	0.58492	1.40326e-07	0.0034227	acyl-CoA dehydrogenase medium chain [Source:ZFIN;Acc:ZDB-GENE-040426-1945]	GO:0003995(acyl-CoA dehydrogenase activity);GO:0005739(mitochondrion);GO:0006635(fatty acid beta-oxidation);GO:0016491(oxidoreductase activity);GO:0016627(oxidoreductase activity, acting on the CH-CH group of donors);GO:0050660(flavin adenine dinucleotide binding);GO:0051793(medium-chain fatty acid catabolic process);GO:0055114(oxidation-reduction process);GO:0070991(medium-chain-acyl-CoA dehydro…	00071(Fatty acid degradation);00280(Valine, leucine and isoleucine degradation);00410(beta-Alanine metabolism);00640(Propanoate metabolism);03320(PPAR signaling pathway)	K00249	EC:1.3.8.7
2	ENSDARG00000043932	stmn4l	0.706586	0.459733	0.620069	1.54406e-07	0.00376611	stathmin-like 4, like [Source:ZFIN;Acc:ZDB-GENE-040718-301]	GO:0005737(cytoplasm);GO:0007019(microtubule depolymerization);GO:0015631(tubulin binding);GO:0031110(regulation of microtubule polymerization or depolymerization);GO:0031175(neuron projection development);GO:0043005(neuron projection);GO:0051493(regulation of cytoskeleton organization)	NA	NA	NA
2	ENSDARG00000087623	BX649485.1	1.40333	0.804159	0.803305	1.94228e-07	0.00473742	NA	NA	NA	NA	NA
2	ENSDARG00000110325	zgc:153733	0.477772	0.345194	0.468913	1.97074e-07	0.00480682	zgc:153733 [Source:ZFIN;Acc:ZDB-GENE-060825-273]	GO:0001881(receptor recycling);GO:0005769(early endosome);GO:0005802(trans-Golgi network);GO:0005829(cytosol);GO:0007032(endosome organization);GO:0042147(retrograde transport, endosome to Golgi);GO:0055037(recycling endosome)	NA	NA	NA
2	ENSDARG00000061994	acacb	0.584176	0.409926	0.511039	2.10638e-07	0.00513768	acetyl-CoA carboxylase beta [Source:ZFIN;Acc:ZDB-GENE-060526-132]	GO:0000166(nucleotide binding);GO:0003989(acetyl-CoA carboxylase activity);GO:0005524(ATP binding);GO:0006633(fatty acid biosynthetic process);GO:0016874(ligase activity);GO:0046872(metal ion binding)	00061(Fatty acid biosynthesis);00620(Pyruvate metabolism);00640(Propanoate metabolism);04910(Insulin signaling pathway);04920(Adipocytokine signaling pathway)	K01946	2.1.3.15;6.3.4.14;EC:6.4.1.2
2	ENSDARG00000019417	gadd45ga	1.18912	0.686346	0.792889	2.59224e-07	0.00632273	growth arrest and DNA-damage-inducible, gamma a [Source:ZFIN;Acc:ZDB-GENE-040426-1882]	GO:0000185(activation of MAPKKK activity);GO:0003674(molecular_function);GO:0005634(nucleus);GO:0005737(cytoplasm);GO:0051726(regulation of cell cycle)	04010(MAPK signaling pathway);04068(FoxO signaling pathway);04110(Cell cycle);04115(p53 signaling pathway);04210(Apoptosis);04218(Cellular senescence)	K04402	NA
2	ENSDARG00000019420	etnk1	1.02205	0.754133	0.438579	2.94834e-07	0.00719129	ethanolamine kinase 1 [Source:ZFIN;Acc:ZDB-GENE-030328-21]	NA	00564(Glycerophospholipid metabolism)	K00894	EC:2.7.1.82
2	ENSDARG00000074371	tirap	0.342277	0.264449	0.372178	3.04785e-07	0.00743402	toll-interleukin 1 receptor (TIR) domain containing adaptor protein [Source:ZFIN;Acc:ZDB-GENE-040219-4]	GO:0005515(protein binding);GO:0007165(signal transduction)	04620(Toll-like receptor signaling pathway)	K05403	NA
2	ENSDARG00000019307	dusp5	10.8971	6.88588	0.662235	3.14026e-07	0.00765941	dual specificity phosphatase 5 [Source:ZFIN;Acc:ZDB-GENE-010625-1]	GO:0000188(inactivation of MAPK activity);GO:0004721(phosphoprotein phosphatase activity);GO:0004725(protein tyrosine phosphatase activity);GO:0005634(nucleus);GO:0005737(cytoplasm);GO:0006470(protein dephosphorylation);GO:0008138(protein tyrosine/serine/threonine phosphatase activity);GO:0016311(dephosphorylation);GO:0016787(hydrolase activity);GO:0016791(phosphatase activity);GO:0017017(MAP kin…	04010(MAPK signaling pathway)	K04459	3.1.3.48;EC:3.1.3.16
2	ENSDARG00000077906	rnf165a	0.639065	0.432955	0.561744	3.5185e-07	0.00858198	ring finger protein 165a [Source:ZFIN;Acc:ZDB-GENE-091118-64]	GO:0005634(nucleus);GO:0008270(zinc ion binding);GO:0016567(protein ubiquitination);GO:0046872(metal ion binding);GO:0061630(ubiquitin protein ligase activity)	NA	K17821	NA
2	ENSDARG00000038524	pik3r1	1.66655	1.09663	0.603783	3.89312e-07	0.00949571	phosphoinositide-3-kinase, regulatory subunit 1 (alpha) [Source:ZFIN;Acc:ZDB-GENE-030131-1280]	GO:0005515(protein binding);GO:0005942(phosphatidylinositol 3-kinase complex);GO:0007165(signal transduction);GO:0008286(insulin receptor signaling pathway);GO:0035014(phosphatidylinositol 3-kinase regulator activity);GO:0043551(regulation of phosphatidylinositol 3-kinase activity);GO:0046854(phosphatidylinositol phosphorylation);GO:0046935(1-phosphatidylinositol-3-kinase regulator activity)	04012(ErbB signaling pathway);04068(FoxO signaling pathway);04070(Phosphatidylinositol signaling system);04140(Autophagy - animal);04150(mTOR signaling pathway);04210(Apoptosis);04218(Cellular senescence);04370(VEGF signaling pathway);04510(Focal adhesion);04620(Toll-like receptor signaling pathway);04625(C-type lectin receptor signaling pathway);04810(Regulation of actin cytoskeleton);04910(Insu…	K02649	NA
2	ENSDARG00000076667	ccng1	2.53727	1.94733	0.381781	3.92379e-07	0.00957052	cyclin G1 [Source:ZFIN;Acc:ZDB-GENE-020322-1]	GO:0000079(regulation of cyclin-dependent protein serine/threonine kinase activity);GO:0000278(mitotic cell cycle);GO:0000307(cyclin-dependent protein kinase holoenzyme complex);GO:0004672(protein kinase activity);GO:0005634(nucleus);GO:0005737(cytoplasm);GO:0006468(protein phosphorylation);GO:0007088(regulation of mitotic nuclear division);GO:0008284(positive regulation of cell population prolif…	04115(p53 signaling pathway)	K10145	NA
2	ENSDARG00000013598	tnfb	6.81171	3.03822	1.16479	3.97221e-07	0.00968862	tumor necrosis factor b (TNF superfamily, member 2) [Source:ZFIN;Acc:ZDB-GENE-050601-2]	GO:0001889(liver development);GO:0005125(cytokine activity);GO:0005164(tumor necrosis factor receptor binding);GO:0005515(protein binding);GO:0005615(extracellular space);GO:0006955(immune response);GO:0010469(regulation of signaling receptor activity);GO:0016020(membrane);GO:0016021(integral component of membrane)	04060(Cytokine-cytokine receptor interaction);05168(Herpes simplex virus 1 infection)	K05468	NA
2	ENSDARG00000037932	lin7b	0.302579	0.241878	0.323034	4.46361e-07	0.0108872	lin-7 homolog B (C. elegans) [Source:ZFIN;Acc:ZDB-GENE-041011-1]	GO:0005515(protein binding);GO:0005886(plasma membrane);GO:0005911(cell-cell junction);GO:0006887(exocytosis);GO:0007269(neurotransmitter secretion);GO:0015031(protein transport);GO:0016020(membrane);GO:0016323(basolateral plasma membrane);GO:0030054(cell junction);GO:0045199(maintenance of epithelial cell apical/basal polarity);GO:0045202(synapse);GO:0097016(L27 domain binding);GO:0097025(MPP7-D…	NA	K19931	NA
2	ENSDARG00000093313	ubb	3.68442	2.65118	0.474801	4.56033e-07	0.0111231	ubiquitin B [Source:ZFIN;Acc:ZDB-GENE-050411-10]	GO:0003674(molecular_function);GO:0005515(protein binding);GO:0005634(nucleus);GO:0005737(cytoplasm);GO:0016567(protein ubiquitination);GO:0019941(modification-dependent protein catabolic process);GO:0031386(protein tag);GO:0031625(ubiquitin protein ligase binding)	03320(PPAR signaling pathway)	K08770	NA
2	ENSDARG00000078311	dcaf6	0.330855	0.256883	0.365088	4.99509e-07	0.0121835	ddb1 and cul4 associated factor 6 [Source:ZFIN;Acc:ZDB-GENE-090206-2]	GO:0005515(protein binding)	NA	K11795	NA
2	ENSDARG00000038881	acaa2	0.538777	0.404406	0.413883	5.69984e-07	0.0139025	acetyl-CoA acyltransferase 2 [Source:ZFIN;Acc:ZDB-GENE-040426-1996]	GO:0003824(catalytic activity);GO:0003985(acetyl-CoA C-acetyltransferase activity);GO:0003988(acetyl-CoA C-acyltransferase activity);GO:0005739(mitochondrion);GO:0006635(fatty acid beta-oxidation);GO:0016740(transferase activity);GO:0016746(transferase activity, transferring acyl groups);GO:0016747(transferase activity, transferring acyl groups other than amino-acyl groups)	00062(Fatty acid elongation);00071(Fatty acid degradation);00280(Valine, leucine and isoleucine degradation)	K07508	EC:2.3.1.16
2	ENSDARG00000003520	tbc1d14	0.456489	0.357761	0.351584	6.34298e-07	0.0154712	TBC1 domain family, member 14 [Source:ZFIN;Acc:ZDB-GENE-030131-6136]	GO:0005096(GTPase activator activity);GO:0005623(cell);GO:0006886(intracellular protein transport);GO:0017137(Rab GTPase binding);GO:0090630(activation of GTPase activity)	NA	K20167	NA
2	ENSDARG00000087749	ccser2a	0.64089	0.459127	0.481182	6.37236e-07	0.0155428	coiled-coil serine-rich protein 2a [Source:ZFIN;Acc:ZDB-GENE-131121-492]	NA	NA	NA	NA
2	ENSDARG00000017844	copz1	1.61343	1.0765	0.583785	6.4097e-07	0.0156339	coatomer protein complex, subunit zeta 1 [Source:ZFIN;Acc:ZDB-GENE-000406-6]	GO:0002088(lens development in camera-type eye);GO:0006886(intracellular protein transport);GO:0006890(retrograde vesicle-mediated transport, Golgi to endoplasmic reticulum);GO:0006891(intra-Golgi vesicle-mediated transport);GO:0016020(membrane);GO:0016192(vesicle-mediated transport);GO:0030117(membrane coat);GO:0030126(COPI vesicle coat)	NA	K20472	NA
2	ENSDARG00000100729	tln1	3.52113	2.69664	0.384876	6.56454e-07	0.0160116	talin 1 [Source:ZFIN;Acc:ZDB-GENE-031002-48]	GO:0001726(ruffle);GO:0003779(actin binding);GO:0005200(structural constituent of cytoskeleton);GO:0005856(cytoskeleton);GO:0005925(focal adhesion);GO:0007016(cytoskeletal anchoring at plasma membrane);GO:0007155(cell adhesion);GO:0007519(skeletal muscle tissue development);GO:0014033(neural crest cell differentiation);GO:0045214(sarcomere organization);GO:0048703(embryonic viscerocranium morphog…	04510(Focal adhesion)	K06271	NA
2	ENSDARG00000043130	notch2	2.27508	1.51294	0.588562	6.78831e-07	0.0165574	notch 2 [Source:ZFIN;Acc:ZDB-GENE-000329-4]	GO:0001889(liver development);GO:0001944(vasculature development);GO:0001946(lymphangiogenesis);GO:0005509(calcium ion binding);GO:0005515(protein binding);GO:0006355(regulation of transcription, DNA-templated);GO:0007219(Notch signaling pathway);GO:0007275(multicellular organism development);GO:0016020(membrane);GO:0016021(integral component of membrane);GO:0030154(cell differentiation);GO:00310…	04330(Notch signaling pathway)	K20994	NA
2	ENSDARG00000079167	si:ch211-230g15.5	1.78662	1.17483	0.604787	6.79397e-07	0.0165712	si:ch211-230g15.5 [Source:ZFIN;Acc:ZDB-GENE-091204-280]	GO:0005515(protein binding)	NA	NA	NA
2	ENSDARG00000055723	hsp70l	0.899041	0.645332	0.478344	7.04842e-07	0.0171918	heat shock cognate 70-kd protein, like [Source:ZFIN;Acc:ZDB-GENE-050321-1]	GO:0000166(nucleotide binding);GO:0001568(blood vessel development);GO:0005524(ATP binding);GO:0005634(nucleus);GO:0005737(cytoplasm);GO:0005829(cytosol);GO:0006986(response to unfolded protein);GO:0009408(response to heat);GO:0010038(response to metal ion);GO:0016887(ATPase activity);GO:0031072(heat shock protein binding);GO:0034605(cellular response to heat);GO:0034620(cellular response to unfo…	03040(Spliceosome);04010(MAPK signaling pathway);04141(Protein processing in endoplasmic reticulum);04144(Endocytosis)	K03283	NA
2	ENSDARG00000079687	rnf10	2.56552	1.72912	0.569216	7.44288e-07	0.0181539	ring finger protein 10 [Source:ZFIN;Acc:ZDB-GENE-030131-2969]	GO:0046872(metal ion binding)	NA	NA	NA
2	ENSDARG00000007960	hnrnpaba	6.37773	4.67677	0.44753	8.94983e-07	0.0218295	heterogeneous nuclear ribonucleoprotein A/Ba [Source:ZFIN;Acc:ZDB-GENE-030131-185]	GO:0003676(nucleic acid binding);GO:0003723(RNA binding);GO:0005654(nucleoplasm);GO:0043565(sequence-specific DNA binding);GO:1990837(sequence-specific double-stranded DNA binding);GO:1990904(ribonucleoprotein complex)	NA	K13044	NA
2	ENSDARG00000102572	si:ch211-260e23.9	1.37922	0.879741	0.648699	9.08699e-07	0.0221641	si:ch211-260e23.9 [Source:ZFIN;Acc:ZDB-GENE-141222-48]	GO:0000045(autophagosome assembly);GO:0005634(nucleus);GO:0005776(autophagosome);GO:0006355(regulation of transcription, DNA-templated);GO:0008285(negative regulation of cell population proliferation);GO:0010506(regulation of autophagy);GO:0045893(positive regulation of transcription, DNA-templated)	NA	NA	NA
2	ENSDARG00000053404	PPP2CA	1.64454	1.10026	0.579834	1.06558e-06	0.0259906	zgc:56064 [Source:ZFIN;Acc:ZDB-GENE-040426-877]	GO:0004721(phosphoprotein phosphatase activity);GO:0005575(cellular_component);GO:0006470(protein dephosphorylation);GO:0016787(hydrolase activity)	03015(mRNA surveillance pathway);04114(Oocyte meiosis);04136(Autophagy - other);04140(Autophagy - animal);04261(Adrenergic signaling in cardiomyocytes);04350(TGF-beta signaling pathway);04530(Tight junction)	K04382	EC:3.1.3.16
2	ENSDARG00000096419	CU659670.1	0.346661	0.269506	0.363207	1.14066e-06	0.0278219	NA	NA	NA	NA	NA
2	ENSDARG00000033889	spty2d1	2.69455	1.67447	0.686339	1.22179e-06	0.0298007	SPT2 chromatin protein domain containing 1 [Source:ZFIN;Acc:ZDB-GENE-050522-212]	NA	NA	K15193	NA
2	ENSDARG00000117312	CABZ01044746.1	0.361836	0.278143	0.379506	1.25649e-06	0.0306472	sb:cb288 [Source:NCBI gene;Acc:321191]	NA	NA	NA	NA
2	ENSDARG00000054332	trim66	0.341649	0.273204	0.322538	1.33639e-06	0.0325959	tripartite motif containing 66 [Source:ZFIN;Acc:ZDB-GENE-040724-145]	GO:0005515(protein binding);GO:0005622(intracellular);GO:0008270(zinc ion binding);GO:0046872(metal ion binding)	NA	NA	NA
2	ENSDARG00000009782	myh11a	3.60239	2.43244	0.566547	1.38584e-06	0.033802	myosin, heavy chain 11a, smooth muscle [Source:ZFIN;Acc:ZDB-GENE-050531-1]	GO:0000166(nucleotide binding);GO:0003774(motor activity);GO:0003779(actin binding);GO:0005515(protein binding);GO:0005524(ATP binding);GO:0008015(blood circulation);GO:0016459(myosin complex);GO:0030860(regulation of polarized epithelial cell differentiation);GO:0048546(digestive tract morphogenesis);GO:0048565(digestive tract development);GO:0051015(actin filament binding);GO:0060047(heart cont…	04530(Tight junction)	K10352	NA
2	ENSDARG00000101766	ptmab	20.4288	16.2511	0.330069	1.47259e-06	0.035918	prothymosin alpha b [Source:ZFIN;Acc:ZDB-GENE-030131-8681]	GO:0005634(nucleus);GO:0006915(apoptotic process)	NA	K13784	NA
2	ENSDARG00000079848	gmps	1.16675	0.778965	0.582868	1.54161e-06	0.0376014	guanine monophosphate synthase [Source:ZFIN;Acc:ZDB-GENE-040426-1503]	GO:0000166(nucleotide binding);GO:0003921(GMP synthase activity);GO:0003922(GMP synthase (glutamine-hydrolyzing) activity);GO:0005524(ATP binding);GO:0005829(cytosol);GO:0006164(purine nucleotide biosynthetic process);GO:0006177(GMP biosynthetic process);GO:0006541(glutamine metabolic process);GO:0016462(pyrophosphatase activity)	00230(Purine metabolism);00983(Drug metabolism - other enzymes)	K01951	EC:6.3.5.2
2	ENSDARG00000099122	naa38	0.511568	0.377214	0.439544	1.61352e-06	0.0393553	N(alpha)-acetyltransferase 38, NatC auxiliary subunit [Source:ZFIN;Acc:ZDB-GENE-030131-7762]	GO:0005634(nucleus);GO:0005737(cytoplasm);GO:0005844(polysome);GO:0031417(NatC complex);GO:0043066(negative regulation of apoptotic process)	NA	K20824	NA
2	ENSDARG00000021059	alas1	3.87801	2.46613	0.653066	1.73651e-06	0.0423553	aminolevulinate, delta-, synthase 1 [Source:ZFIN;Acc:ZDB-GENE-001229-2]	GO:0003824(catalytic activity);GO:0003870(5-aminolevulinate synthase activity);GO:0005739(mitochondrion);GO:0005759(mitochondrial matrix);GO:0006778(porphyrin-containing compound metabolic process);GO:0006782(protoporphyrinogen IX biosynthetic process);GO:0006783(heme biosynthetic process);GO:0009058(biosynthetic process);GO:0016740(transferase activity);GO:0016746(transferase activity, transferr…	00260(Glycine, serine and threonine metabolism);00860(Porphyrin and chlorophyll metabolism)	K00643	EC:2.3.1.37
2	ENSDARG00000015915	slc25a36b	0.660908	0.469411	0.493597	1.78496e-06	0.0435369	solute carrier family 25 (pyrimidine nucleotide carrier ), member 36b [Source:ZFIN;Acc:ZDB-GENE-080219-28]	GO:0015218(pyrimidine nucleotide transmembrane transporter activity);GO:0016020(membrane);GO:0016021(integral component of membrane);GO:0022857(transmembrane transporter activity);GO:0055085(transmembrane transport);GO:1990519(pyrimidine nucleotide import into mitochondrion)	NA	K15116	NA
2	ENSDARG00000035676	ptp4a2b	4.751	3.38013	0.491153	1.97276e-06	0.0481176	protein tyrosine phosphatase type IVA, member 2b [Source:ZFIN;Acc:ZDB-GENE-041114-111]	GO:0004725(protein tyrosine phosphatase activity);GO:0005634(nucleus);GO:0005737(cytoplasm);GO:0006470(protein dephosphorylation);GO:0008138(protein tyrosine/serine/threonine phosphatase activity);GO:0016311(dephosphorylation);GO:0016791(phosphatase activity);GO:0035335(peptidyl-tyrosine dephosphorylation)	NA	K18041	EC:3.1.3.48
2	ENSDARG00000007526	ndufs2	0.844685	0.595616	0.50403	2.04992e-06	0.0499996	NADH:ubiquinone oxidoreductase core subunit S2 [Source:ZFIN;Acc:ZDB-GENE-050522-273]	GO:0016651(oxidoreductase activity, acting on NAD(P)H);GO:0048038(quinone binding);GO:0051287(NAD binding);GO:0055114(oxidation-reduction process)	00190(Oxidative phosphorylation)	K03935	1.6.99.3;EC:7.1.1.2
2	ENSDARG00000015278	plxnc1	0.557155	0.421859	0.401317	2.05819e-06	0.0502012	plexin C1 [Source:ZFIN;Acc:ZDB-GENE-030131-1620]	GO:0002116(semaphorin receptor complex);GO:0005515(protein binding);GO:0005887(integral component of plasma membrane);GO:0007162(negative regulation of cell adhesion);GO:0007165(signal transduction);GO:0008360(regulation of cell shape);GO:0016020(membrane);GO:0016021(integral component of membrane);GO:0017154(semaphorin receptor activity);GO:0030334(regulation of cell migration);GO:0043087(regula…	NA	K06572	NA
2	ENSDARG00000105643	adgrg1	1.73779	1.33339	0.382153	2.13862e-06	0.0521631	adhesion G protein-coupled receptor G1 [Source:ZFIN;Acc:ZDB-GENE-030131-3671]	GO:0004672(protein kinase activity);GO:0004930(G protein-coupled receptor activity);GO:0005524(ATP binding);GO:0005887(integral component of plasma membrane);GO:0006468(protein phosphorylation);GO:0007189(adenylate cyclase-activating G protein-coupled receptor signaling pathway);GO:0014003(oligodendrocyte development);GO:0032287(peripheral nervous system myelin maintenance);GO:0042981(regulation …	NA	NA	NA
2	ENSDARG00000025847	sox12	0.780679	0.537743	0.537814	2.23244e-06	0.0544515	SRY (sex determining region Y)-box 12 [Source:ZFIN;Acc:ZDB-GENE-040724-33]	GO:0000981(DNA-binding transcription factor activity, RNA polymerase II-specific);GO:0003677(DNA binding);GO:0003700(DNA-binding transcription factor activity);GO:0005634(nucleus);GO:0006355(regulation of transcription, DNA-templated);GO:0006357(regulation of transcription by RNA polymerase II);GO:0030154(cell differentiation);GO:0044798(nuclear transcription factor complex)	NA	K09268	NA
2	ENSDARG00000087636	hmgn6	2.66446	1.84128	0.533136	2.29853e-06	0.0560636	high mobility group nucleosome binding domain 6 [Source:ZFIN;Acc:ZDB-GENE-030131-1005]	GO:0000785(chromatin);GO:0003682(chromatin binding);GO:0005634(nucleus);GO:0031492(nucleosomal DNA binding);GO:0045944(positive regulation of transcription by RNA polymerase II);GO:0061178(regulation of insulin secretion involved in cellular response to glucose stimulus)	NA	K11299	NA
2	ENSDARG00000019213	CTBP1	0.409855	0.325757	0.331318	2.33535e-06	0.0569616	zgc:136929 [Source:ZFIN;Acc:ZDB-GENE-060421-4235]	GO:0016491(oxidoreductase activity);GO:0016616(oxidoreductase activity, acting on the CH-OH group of donors, NAD or NADP as acceptor);GO:0051287(NAD binding);GO:0055114(oxidation-reduction process)	04310(Wnt signaling pathway);04330(Notch signaling pathway)	K04496	NA
2	ENSDARG00000017757	pik3cg	1.55913	1.07707	0.533627	2.43463e-06	0.059383	phosphatidylinositol-4,5-bisphosphate 3-kinase, catalytic subunit gamma [Source:ZFIN;Acc:ZDB-GENE-040426-2532]	GO:0000166(nucleotide binding);GO:0005524(ATP binding);GO:0005737(cytoplasm);GO:0005886(plasma membrane);GO:0005942(phosphatidylinositol 3-kinase complex);GO:0006468(protein phosphorylation);GO:0014065(phosphatidylinositol 3-kinase signaling);GO:0016020(membrane);GO:0016301(kinase activity);GO:0016303(1-phosphatidylinositol-3-kinase activity);GO:0016310(phosphorylation);GO:0016477(cell migration)…	00562(Inositol phosphate metabolism);04261(Adrenergic signaling in cardiomyocytes);04371(Apelin signaling pathway)	K21289	EC:2.7.1.153
2	ENSDARG00000062469	hipk3a	1.15778	0.890902	0.378024	2.4617e-06	0.0600432	homeodomain interacting protein kinase 3a [Source:ZFIN;Acc:ZDB-GENE-061207-54]	GO:0004672(protein kinase activity);GO:0005524(ATP binding);GO:0006468(protein phosphorylation);GO:0071466(cellular response to xenobiotic stimulus)	04218(Cellular senescence)	K08826	EC:2.7.11.1
2	ENSDARG00000030155	ssbp3b	0.49783	0.38389	0.37496	2.52719e-06	0.0616406	single stranded DNA binding protein 3b [Source:ZFIN;Acc:ZDB-GENE-040426-2801]	GO:0000978(RNA polymerase II proximal promoter sequence-specific DNA binding);GO:0003677(DNA binding);GO:0003697(single-stranded DNA binding);GO:0005515(protein binding);GO:0005634(nucleus);GO:0045944(positive regulation of transcription by RNA polymerase II)	NA	NA	NA
2	ENSDARG00000033042	ptprja	0.450248	0.361219	0.317843	2.59076e-06	0.0631911	protein tyrosine phosphatase, receptor type, J a [Source:ZFIN;Acc:ZDB-GENE-030131-8301]	GO:0004721(phosphoprotein phosphatase activity);GO:0004725(protein tyrosine phosphatase activity);GO:0005515(protein binding);GO:0006470(protein dephosphorylation);GO:0016020(membrane);GO:0016021(integral component of membrane);GO:0016311(dephosphorylation);GO:0016787(hydrolase activity);GO:0016791(phosphatase activity);GO:0035335(peptidyl-tyrosine dephosphorylation);GO:0048844(artery morphogenes…	04520(Adherens junction)	K05698	EC:3.1.3.48
2	ENSDARG00000087528	snip1	0.572746	0.405232	0.499147	2.71118e-06	0.0661285	Smad nuclear interacting protein [Source:ZFIN;Acc:ZDB-GENE-041026-3]	GO:0003729(mRNA binding);GO:0005515(protein binding);GO:0005634(nucleus);GO:0035196(production of miRNAs involved in gene silencing by miRNA)	NA	K13108	NA
2	ENSDARG00000000068	slc9a3r1a	1.83927	1.29304	0.508365	2.76598e-06	0.0674651	SLC9A3 regulator 1a [Source:ZFIN;Acc:ZDB-GENE-031006-7]	GO:0005515(protein binding);GO:0005886(plasma membrane);GO:0006612(protein targeting to membrane);GO:0012505(endomembrane system);GO:0016020(membrane);GO:0021591(ventricular system development);GO:0032947(protein-containing complex scaffold activity);GO:0043113(receptor clustering);GO:0055078(sodium ion homeostasis);GO:0071599(otic vesicle development)	04530(Tight junction)	K13365	NA
2	ENSDARG00000099614	purab	1.34028	0.844685	0.666051	2.97353e-06	0.0725274	purine-rich element binding protein Ab [Source:ZFIN;Acc:ZDB-GENE-141216-78]	GO:0000122(negative regulation of transcription by RNA polymerase II);GO:0000977(RNA polymerase II regulatory region sequence-specific DNA binding);GO:0001227(DNA-binding transcription repressor activity, RNA polymerase II-specific);GO:0003690(double-stranded DNA binding);GO:0005634(nucleus);GO:0032422(purine-rich negative regulatory element binding);GO:0043565(sequence-specific DNA binding)	NA	K21772	NA
2	ENSDARG00000102320	mob1a	3.51857	2.59722	0.438022	3.35496e-06	0.0818308	MOB kinase activator 1A [Source:ZFIN;Acc:ZDB-GENE-030131-6506]	GO:0001756(somitogenesis);GO:0005575(cellular_component);GO:0007417(central nervous system development);GO:0008283(cell population proliferation);GO:0043009(chordate embryonic development)	NA	NA	NA
2	ENSDARG00000038834	etfdh	0.422196	0.351269	0.26534	3.68639e-06	0.0899149	electron transfer flavoprotein dehydrogenase [Source:ZFIN;Acc:ZDB-GENE-040912-168]	GO:0004174(electron-transferring-flavoprotein dehydrogenase activity);GO:0009055(electron transfer activity);GO:0016020(membrane);GO:0016021(integral component of membrane);GO:0016491(oxidoreductase activity);GO:0022900(electron transport chain);GO:0022904(respiratory electron transport chain);GO:0031305(integral component of mitochondrial inner membrane);GO:0043783(oxidoreductase activity, oxidi…	NA	K00311	EC:1.5.5.1
2	ENSDARG00000009087	cd74a	22.0004	14.328	0.618696	4.26654e-06	0.104065	CD74 molecule, major histocompatibility complex, class II invariant chain a [Source:ZFIN;Acc:ZDB-GENE-000901-1]	GO:0002286(T cell activation involved in immune response);GO:0002468(dendritic cell antigen processing and presentation);GO:0006886(intracellular protein transport);GO:0006955(immune response);GO:0009986(cell surface);GO:0016020(membrane);GO:0016021(integral component of membrane);GO:0019882(antigen processing and presentation);GO:0042289(MHC class II protein binding);GO:0048839(inner ear develop…	05168(Herpes simplex virus 1 infection)	K06505	NA
2	ENSDARG00000059001	pim2	6.39598	4.05025	0.659155	4.29896e-06	0.104856	Pim-2 proto-oncogene, serine/threonine kinase [Source:ZFIN;Acc:ZDB-GENE-000831-6]	GO:0000166(nucleotide binding);GO:0004672(protein kinase activity);GO:0004674(protein serine/threonine kinase activity);GO:0005524(ATP binding);GO:0005737(cytoplasm);GO:0006468(protein phosphorylation);GO:0016301(kinase activity);GO:0016310(phosphorylation);GO:0016740(transferase activity);GO:0043066(negative regulation of apoptotic process)	04933(AGE-RAGE signaling pathway in diabetic complications)	K04702	EC:2.7.11.1
2	ENSDARG00000095288	rusc2	0.613586	0.447165	0.456459	4.39767e-06	0.107264	RUN and SH3 domain containing 2 [Source:ZFIN;Acc:ZDB-GENE-060526-131]	GO:0005515(protein binding)	NA	K23291	NA
2	ENSDARG00000059680	fscn1a	0.54209	0.406326	0.415895	4.74547e-06	0.115747	fascin actin-bundling protein 1a [Source:ZFIN;Acc:ZDB-GENE-031009-1]	GO:0001755(neural crest cell migration);GO:0001889(liver development);GO:0003779(actin binding);GO:0005102(signaling receptor binding);GO:0005737(cytoplasm);GO:0005856(cytoskeleton);GO:0007015(actin filament organization);GO:0007163(establishment or maintenance of cell polarity);GO:0007492(endoderm development);GO:0016477(cell migration);GO:0030036(actin cytoskeleton organization);GO:0030674(prot…	NA	K17455	NA
2	ENSDARG00000002240	psmb6	1.25025	0.926099	0.432975	4.95704e-06	0.120907	proteasome subunit beta 6 [Source:ZFIN;Acc:ZDB-GENE-990415-216]	GO:0000502(proteasome complex);GO:0004175(endopeptidase activity);GO:0004298(threonine-type endopeptidase activity);GO:0005634(nucleus);GO:0005737(cytoplasm);GO:0005839(proteasome core complex);GO:0006508(proteolysis);GO:0008233(peptidase activity);GO:0010498(proteasomal protein catabolic process);GO:0010499(proteasomal ubiquitin-independent protein catabolic process);GO:0016787(hydrolase activit…	03050(Proteasome)	K02738	EC:3.4.25.1
2	ENSDARG00000105408	BX248082.1	5.08342	3.14339	0.693478	5.06148e-06	0.123455	NA	NA	NA	NA	NA
2	ENSDARG00000068763	plcg2	1.32312	0.883436	0.58275	5.24054e-06	0.127822	phospholipase C, gamma 2 [Source:ZFIN;Acc:ZDB-GENE-030131-9532]	GO:0003674(molecular_function);GO:0004435(phosphatidylinositol phospholipase C activity);GO:0005515(protein binding);GO:0005737(cytoplasm);GO:0005765(lysosomal membrane);GO:0005886(plasma membrane);GO:0006629(lipid metabolic process);GO:0007165(signal transduction);GO:0008081(phosphoric diester hydrolase activity);GO:0009395(phospholipid catabolic process);GO:0016020(membrane);GO:0016042(lipid ca…	00562(Inositol phosphate metabolism);04012(ErbB signaling pathway);04020(Calcium signaling pathway);04070(Phosphatidylinositol signaling system);04370(VEGF signaling pathway);04625(C-type lectin receptor signaling pathway);04933(AGE-RAGE signaling pathway in diabetic complications)	K05859	EC:3.1.4.11
2	ENSDARG00000079826	gpr174	1.17943	0.791953	0.5746	5.54389e-06	0.135221	G protein-coupled receptor 174 [Source:ZFIN;Acc:ZDB-GENE-100930-1]	GO:0004930(G protein-coupled receptor activity);GO:0005887(integral component of plasma membrane);GO:0007186(G protein-coupled receptor signaling pathway);GO:0016020(membrane);GO:0016021(integral component of membrane);GO:0035025(positive regulation of Rho protein signal transduction);GO:0051482(positive regulation of cytosolic calcium ion concentration involved in phospholipase C-activating G pr…	NA	K08391	NA
2	ENSDARG00000099572	hmgn2	17.1839	12.1056	0.505385	5.86514e-06	0.143057	high mobility group nucleosomal binding domain 2 [Source:ZFIN;Acc:ZDB-GENE-051030-81]	GO:0000785(chromatin);GO:0005634(nucleus);GO:0008150(biological_process);GO:0031492(nucleosomal DNA binding)	NA	K11300	NA
2	ENSDARG00000053113	ly75	2.01587	1.50548	0.421174	6.58439e-06	0.1606	lymphocyte antigen 75 [Source:ZFIN;Acc:ZDB-GENE-050309-166]	GO:0004888(transmembrane signaling receptor activity);GO:0008150(biological_process);GO:0016020(membrane);GO:0016021(integral component of membrane)	NA	K06559	NA
2	ENSDARG00000076697	SIPA1	0.873466	0.610275	0.517292	6.67958e-06	0.162922	zmp:0000001168 [Source:ZFIN;Acc:ZDB-GENE-140106-128]	GO:0005096(GTPase activator activity);GO:0005515(protein binding);GO:0016020(membrane);GO:0016021(integral component of membrane);GO:0043547(positive regulation of GTPase activity);GO:0051056(regulation of small GTPase mediated signal transduction)	NA	NA	NA
2	ENSDARG00000073909	ppip5k1b	0.407205	0.314629	0.372106	6.72623e-06	0.164059	diphosphoinositol pentakisphosphate kinase 1b [Source:ZFIN;Acc:ZDB-GENE-100426-5]	GO:0000166(nucleotide binding);GO:0000828(inositol hexakisphosphate kinase activity);GO:0000829(inositol heptakisphosphate kinase activity);GO:0000832(inositol hexakisphosphate 5-kinase activity);GO:0005524(ATP binding);GO:0005737(cytoplasm);GO:0005829(cytosol);GO:0006020(inositol metabolic process);GO:0016301(kinase activity);GO:0016310(phosphorylation);GO:0016740(transferase activity);GO:003295…	NA	NA	NA
2	ENSDARG00000021924	hsp70.3	2.48814	1.31491	0.920106	7.19022e-06	0.175377	heat shock cognate 70-kd protein, tandem duplicate 3 [Source:ZFIN;Acc:ZDB-GENE-110713-1]	GO:0000166(nucleotide binding);GO:0005524(ATP binding);GO:0005634(nucleus);GO:0005737(cytoplasm);GO:0005829(cytosol);GO:0006986(response to unfolded protein);GO:0016887(ATPase activity);GO:0031072(heat shock protein binding);GO:0034605(cellular response to heat);GO:0034620(cellular response to unfolded protein);GO:0042026(protein refolding);GO:0042623(ATPase activity, coupled);GO:0044183(protein …	03040(Spliceosome);04010(MAPK signaling pathway);04141(Protein processing in endoplasmic reticulum);04144(Endocytosis)	K03283	NA
2	ENSDARG00000053381	plpp1a	0.311629	0.245622	0.343389	7.47368e-06	0.182291	phospholipid phosphatase 1a [Source:ZFIN;Acc:ZDB-GENE-080225-26]	GO:0005886(plasma membrane);GO:0005887(integral component of plasma membrane);GO:0006629(lipid metabolic process);GO:0006644(phospholipid metabolic process);GO:0008195(phosphatidate phosphatase activity);GO:0016020(membrane);GO:0016021(integral component of membrane);GO:0016311(dephosphorylation);GO:0016791(phosphatase activity);GO:0042577(lipid phosphatase activity);GO:0046839(phospholipid depho…	00561(Glycerolipid metabolism);00564(Glycerophospholipid metabolism);00565(Ether lipid metabolism);00600(Sphingolipid metabolism)	K01080	EC:3.1.3.4
2	ENSDARG00000097993	si:ch211-191c10.1	1.36625	0.863178	0.662493	7.51535e-06	0.183307	si:ch211-191c10.1 [Source:ZFIN;Acc:ZDB-GENE-131127-387]	GO:0005509(calcium ion binding)	NA	NA	NA
2	ENSDARG00000016016	dbnlb	1.42265	1.01306	0.489852	7.58122e-06	0.184914	drebrin-like b [Source:ZFIN;Acc:ZDB-GENE-050522-293]	GO:0003779(actin binding);GO:0005515(protein binding);GO:0005622(intracellular);GO:0006898(receptor-mediated endocytosis);GO:0007416(synapse assembly);GO:0048812(neuron projection morphogenesis);GO:0051015(actin filament binding);GO:0097178(ruffle assembly)	NA	K20520	NA
2	ENSDARG00000075349	si:ch73-138n13.1	0.551062	0.405554	0.442321	7.93315e-06	0.193497	si:ch73-138n13.1 [Source:ZFIN;Acc:ZDB-GENE-091204-448]	GO:0003674(molecular_function);GO:0008150(biological_process);GO:0016020(membrane);GO:0016021(integral component of membrane)	NA	NA	NA
2	ENSDARG00000052978	mbnl1	0.800984	0.606913	0.400284	8.06279e-06	0.19666	muscleblind-like splicing regulator 1 [Source:ZFIN;Acc:ZDB-GENE-060929-704]	GO:0000381(regulation of alternative mRNA splicing, via spliceosome);GO:0003723(RNA binding);GO:0005575(cellular_component);GO:0005634(nucleus);GO:0005654(nucleoplasm);GO:0005737(cytoplasm);GO:0008150(biological_process);GO:0046872(metal ion binding)	NA	K14943	NA
2	ENSDARG00000002353	tagapa	16.8139	13.7853	0.286527	8.96635e-06	0.218698	T cell activation RhoGTPase activating protein a [Source:ZFIN;Acc:ZDB-GENE-040426-1877]	GO:0005096(GTPase activator activity);GO:0007165(signal transduction);GO:0043547(positive regulation of GTPase activity)	NA	NA	NA
2	ENSDARG00000041450	rab11a	1.0125	0.763543	0.407141	9.49901e-06	0.23169	RAB11a, member RAS oncogene family [Source:ZFIN;Acc:ZDB-GENE-041114-53]	GO:0001525(angiogenesis);GO:0001944(vasculature development);GO:0003924(GTPase activity);GO:0005525(GTP binding);GO:0005768(endosome);GO:0006886(intracellular protein transport);GO:0006887(exocytosis);GO:0032402(melanosome transport);GO:0032482(Rab protein signal transduction);GO:0055037(recycling endosome);GO:0070121(Kupffer's vesicle development)	04144(Endocytosis)	K07904	NA
2	ENSDARG00000024940	rnf144b	0.58628	0.451263	0.377619	9.61199e-06	0.234446	ring finger protein 144B [Source:ZFIN;Acc:ZDB-GENE-040426-1292]	GO:0000151(ubiquitin ligase complex);GO:0000209(protein polyubiquitination);GO:0004842(ubiquitin-protein transferase activity);GO:0005737(cytoplasm);GO:0006511(ubiquitin-dependent protein catabolic process);GO:0016020(membrane);GO:0016021(integral component of membrane);GO:0016567(protein ubiquitination);GO:0016740(transferase activity);GO:0031624(ubiquitin conjugating enzyme binding);GO:0032436(…	NA	K11975	EC:2.3.2.31
2	ENSDARG00000073843	myo9ab	0.356478	0.280263	0.347033	9.83991e-06	0.240005	myosin IXAb [Source:ZFIN;Acc:ZDB-GENE-080424-6]	GO:0000166(nucleotide binding);GO:0003774(motor activity);GO:0003779(actin binding);GO:0005096(GTPase activator activity);GO:0005515(protein binding);GO:0005524(ATP binding);GO:0007165(signal transduction);GO:0007626(locomotory behavior);GO:0016459(myosin complex);GO:0035556(intracellular signal transduction);GO:0036269(swimming behavior);GO:0043547(positive regulation of GTPase activity);GO:0046…	NA	NA	NA
2	ENSDARG00000018809	abhd3	0.400857	0.31991	0.325424	1.01171e-05	0.246766	abhydrolase domain containing 3 [Source:ZFIN;Acc:ZDB-GENE-040912-90]	GO:0005575(cellular_component);GO:0016298(lipase activity);GO:0034338(short-chain carboxylesterase activity);GO:0044255(cellular lipid metabolic process);GO:0047372(acylglycerol lipase activity);GO:0051792(medium-chain fatty acid biosynthetic process);GO:0051793(medium-chain fatty acid catabolic process)	NA	K13696	NA
2	ENSDARG00000028067	bnip3lb	1.00088	0.711246	0.492851	1.22632e-05	0.299111	BCL2 interacting protein 3 like b [Source:ZFIN;Acc:ZDB-GENE-040325-1]	GO:0001947(heart looping);GO:0005635(nuclear envelope);GO:0005740(mitochondrial envelope);GO:0005741(mitochondrial outer membrane);GO:0005783(endoplasmic reticulum);GO:0016020(membrane);GO:0016021(integral component of membrane);GO:0043065(positive regulation of apoptotic process);GO:0045822(negative regulation of heart contraction);GO:0097345(mitochondrial outer membrane permeabilization)	04137(Mitophagy - animal)	K15465	NA
2	ENSDARG00000045359	elocb	1.0136	0.840492	0.270182	1.30002e-05	0.317089	elongin C paralog b [Source:ZFIN;Acc:ZDB-GENE-040718-138]	GO:0004842(ubiquitin-protein transferase activity);GO:0006511(ubiquitin-dependent protein catabolic process);GO:0016567(protein ubiquitination);GO:0032968(positive regulation of transcription elongation from RNA polymerase II promoter);GO:0070449(elongin complex)	04120(Ubiquitin mediated proteolysis)	K03872	NA
2	ENSDARG00000025576	mkln1	0.310946	0.250872	0.309712	1.36744e-05	0.333533	muskelin 1, intracellular mediator containing kelch motifs [Source:ZFIN;Acc:ZDB-GENE-030131-3942]	GO:0005515(protein binding)	NA	NA	NA
2	ENSDARG00000078888	iqgap1	1.39441	0.962858	0.534256	1.37531e-05	0.335452	IQ motif containing GTPase activating protein 1 [Source:ZFIN;Acc:ZDB-GENE-050809-24]	GO:0005515(protein binding);GO:0005623(cell);GO:0007165(signal transduction);GO:0043087(regulation of GTPase activity)	04520(Adherens junction);04810(Regulation of actin cytoskeleton)	K16848	NA
2	ENSDARG00000056929	kdm6bb	1.25073	0.871707	0.520855	1.42364e-05	0.34724	lysine (K)-specific demethylase 6B, b [Source:ZFIN;Acc:ZDB-GENE-040724-166]	GO:0000978(RNA polymerase II proximal promoter sequence-specific DNA binding);GO:0003682(chromatin binding);GO:0005634(nucleus);GO:0007507(heart development);GO:0031101(fin regeneration);GO:0031490(chromatin DNA binding);GO:0043565(sequence-specific DNA binding);GO:0044666(MLL3/4 complex);GO:0046872(metal ion binding);GO:0060319(primitive erythrocyte differentiation);GO:0061384(heart trabecula mo…	NA	K11448	EC:1.14.11.-
2	ENSDARG00000101457	cdc42ep4a	0.478852	0.369981	0.372128	1.51272e-05	0.368967	CDC42 effector protein (Rho GTPase binding) 4a [Source:ZFIN;Acc:ZDB-GENE-040704-22]	GO:0005737(cytoplasm);GO:0005886(plasma membrane);GO:0007266(Rho protein signal transduction);GO:0008360(regulation of cell shape);GO:0017049(GTP-Rho binding);GO:0030838(positive regulation of actin filament polymerization);GO:0031274(positive regulation of pseudopodium assembly)	NA	NA	NA
2	ENSDARG00000078734	myo1f	0.595186	0.438513	0.44072	1.54934e-05	0.377899	myosin IF [Source:ZFIN;Acc:ZDB-GENE-081104-506]	GO:0000166(nucleotide binding);GO:0003774(motor activity);GO:0003779(actin binding);GO:0005515(protein binding);GO:0005524(ATP binding);GO:0016459(myosin complex)	NA	K10356	NA
2	ENSDARG00000036482	hexim1	1.79418	1.28084	0.486239	1.59754e-05	0.389656	HEXIM P-TEFb complex subunit 1 [Source:ZFIN;Acc:ZDB-GENE-030131-4637]	GO:0000122(negative regulation of transcription by RNA polymerase II);GO:0004861(cyclin-dependent protein serine/threonine kinase inhibitor activity);GO:0005634(nucleus);GO:0005737(cytoplasm);GO:0017069(snRNA binding);GO:0045736(negative regulation of cyclin-dependent protein serine/threonine kinase activity)	NA	K15189	NA
2	ENSDARG00000001782	prkacba	1.5586	1.07224	0.53963	1.75027e-05	0.426908	protein kinase, cAMP-dependent, catalytic, beta a [Source:ZFIN;Acc:ZDB-GENE-040426-1351]	GO:0000166(nucleotide binding);GO:0004672(protein kinase activity);GO:0004674(protein serine/threonine kinase activity);GO:0005524(ATP binding);GO:0005575(cellular_component);GO:0006468(protein phosphorylation);GO:0016301(kinase activity);GO:0016310(phosphorylation);GO:0016740(transferase activity)	04010(MAPK signaling pathway);04020(Calcium signaling pathway);04114(Oocyte meiosis);04140(Autophagy - animal);04261(Adrenergic signaling in cardiomyocytes);04270(Vascular smooth muscle contraction);04310(Wnt signaling pathway);04340(Hedgehog signaling pathway);04371(Apelin signaling pathway);04530(Tight junction);04540(Gap junction);04910(Insulin signaling pathway);04912(GnRH signaling pathway);…	K04345	EC:2.7.11.11
2	ENSDARG00000027249	btg1	28.3729	21.6424	0.390651	1.78437e-05	0.435225	B-cell translocation gene 1, anti-proliferative [Source:ZFIN;Acc:ZDB-GENE-010726-1]	GO:0005634(nucleus);GO:0005737(cytoplasm);GO:0008285(negative regulation of cell population proliferation);GO:0045930(negative regulation of mitotic cell cycle)	03018(RNA degradation)	K14443	NA
2	ENSDARG00000026350	wasb	7.41776	5.75679	0.36572	1.80428e-05	0.440082	Wiskott-Aldrich syndrome (eczema-thrombocytopenia) b [Source:ZFIN;Acc:ZDB-GENE-030131-7098]	GO:0000147(actin cortical patch assembly);GO:0003779(actin binding);GO:0005884(actin filament);GO:0006897(endocytosis);GO:0007015(actin filament organization);GO:0030048(actin filament-based movement);GO:0030479(actin cortical patch);GO:0030593(neutrophil chemotaxis);GO:0030595(leukocyte chemotaxis);GO:0048246(macrophage chemotaxis);GO:0051015(actin filament binding);GO:0051127(positive regulatio…	04144(Endocytosis);04520(Adherens junction);04530(Tight junction);04810(Regulation of actin cytoskeleton);05132(Salmonella infection)	K05747	NA
2	ENSDARG00000017338	kidins220b	0.61858	0.515785	0.262191	1.91533e-05	0.467168	kinase D-interacting substrate 220b [Source:ZFIN;Acc:ZDB-GENE-030131-7824]	GO:0005515(protein binding);GO:0016020(membrane);GO:0016021(integral component of membrane)	NA	NA	NA
2	ENSDARG00000104018	mtpn	1.17093	0.828626	0.49886	1.94e-05	0.473186	myotrophin [Source:ZFIN;Acc:ZDB-GENE-040426-2166]	GO:0005515(protein binding);GO:0005634(nucleus);GO:0005737(cytoplasm);GO:0048471(perinuclear region of cytoplasm)	NA	NA	NA
2	ENSDARG00000017272	eapp	0.380357	0.299051	0.346964	2.01804e-05	0.49222	e2f-associated phosphoprotein [Source:ZFIN;Acc:ZDB-GENE-030131-5529]	GO:0005634(nucleus);GO:0008284(positive regulation of cell population proliferation)	NA	NA	NA
2	ENSDARG00000062558	rspry1	0.825882	0.589612	0.48617	2.0324e-05	0.495724	ring finger and SPRY domain containing 1 [Source:ZFIN;Acc:ZDB-GENE-061026-2]	GO:0005515(protein binding);GO:0046872(metal ion binding)	NA	NA	NA
2	ENSDARG00000077694	dtnba	0.517606	0.407444	0.345253	2.09005e-05	0.509784	dystrobrevin, beta a [Source:ZFIN;Acc:ZDB-GENE-030131-3967]	GO:0005737(cytoplasm);GO:0008270(zinc ion binding);GO:0046872(metal ion binding)	NA	NA	NA
2	ENSDARG00000010519	per3	1.76599	1.18379	0.577067	2.10027e-05	0.512276	period circadian clock 3 [Source:ZFIN;Acc:ZDB-GENE-000804-1]	GO:0000122(negative regulation of transcription by RNA polymerase II);GO:0000976(transcription regulatory region sequence-specific DNA binding);GO:0001222(transcription corepressor binding);GO:0005515(protein binding);GO:0005634(nucleus);GO:0005737(cytoplasm);GO:0008134(transcription factor binding);GO:0009416(response to light stimulus);GO:0009648(photoperiodism);GO:0032922(circadian regulation …	NA	K21945	NA
2	ENSDARG00000103340	clic1	1.28252	0.94242	0.444542	2.16074e-05	0.527025	chloride intracellular channel 1 [Source:ZFIN;Acc:ZDB-GENE-030131-3202]	GO:0005244(voltage-gated ion channel activity);GO:0005254(chloride channel activity);GO:0005515(protein binding);GO:0005634(nucleus);GO:0005737(cytoplasm);GO:0006811(ion transport);GO:0006821(chloride transport);GO:0016020(membrane);GO:0034220(ion transmembrane transport);GO:0034707(chloride channel complex);GO:0034765(regulation of ion transmembrane transport);GO:0051726(regulation of cell cycle…	NA	K05021	NA
2	ENSDARG00000034210	si:dkey-240h12.4	0.409333	0.322617	0.343455	2.23654e-05	0.545515	si:dkey-240h12.4 [Source:ZFIN;Acc:ZDB-GENE-070705-406]	GO:0000166(nucleotide binding);GO:0004672(protein kinase activity);GO:0004674(protein serine/threonine kinase activity);GO:0005524(ATP binding);GO:0006468(protein phosphorylation)	04140(Autophagy - animal)	K08803	EC:2.7.11.1
2	ENSDARG00000061841	tiparp	2.15728	1.48029	0.543338	2.43256e-05	0.593325	TCDD-inducible poly(ADP-ribose) polymerase [Source:ZFIN;Acc:ZDB-GENE-031002-47]	GO:0003950(NAD+ ADP-ribosyltransferase activity);GO:0005575(cellular_component);GO:0008270(zinc ion binding);GO:0046872(metal ion binding);GO:0071466(cellular response to xenobiotic stimulus)	NA	K15259	EC:2.4.2.30
2	ENSDARG00000100387	si:dkey-78o7.3	6.54881	3.74549	0.806081	2.47379e-05	0.603382	si:dkey-78o7.3 [Source:ZFIN;Acc:ZDB-GENE-120709-79]	NA	NA	NA	NA
2	ENSDARG00000054340	sla1a	0.282496	0.231047	0.290043	2.65194e-05	0.646834	Src-like-adaptor 1 [Source:ZFIN;Acc:ZDB-GENE-050904-3]	GO:0004715(non-membrane spanning protein tyrosine kinase activity);GO:0005070(SH3/SH2 adaptor activity);GO:0005515(protein binding);GO:0009966(regulation of signal transduction);GO:0009967(positive regulation of signal transduction);GO:0030154(cell differentiation);GO:0038083(peptidyl-tyrosine autophosphorylation);GO:0042127(regulation of cell population proliferation)	NA	NA	NA
2	ENSDARG00000058225	arpc4l	1.79062	1.26788	0.498036	2.80731e-05	0.684732	actin related protein 2/3 complex, subunit 4, like [Source:ZFIN;Acc:ZDB-GENE-040808-18]	GO:0003779(actin binding);GO:0005737(cytoplasm);GO:0005856(cytoskeleton);GO:0005885(Arp2/3 protein complex);GO:0015629(actin cytoskeleton);GO:0030041(actin filament polymerization);GO:0030833(regulation of actin filament polymerization);GO:0034314(Arp2/3 complex-mediated actin nucleation)	04144(Endocytosis);04810(Regulation of actin cytoskeleton);05132(Salmonella infection)	K05755	NA
2	ENSDARG00000004757	ybx1	17.6796	14.268	0.309306	2.87682e-05	0.701686	Y box binding protein 1 [Source:ZFIN;Acc:ZDB-GENE-000629-3]	GO:0003676(nucleic acid binding);GO:0003723(RNA binding);GO:0005634(nucleus);GO:0008190(eukaryotic initiation factor 4E binding);GO:0045947(negative regulation of translational initiation);GO:0048025(negative regulation of mRNA splicing, via spliceosome);GO:0050686(negative regulation of mRNA processing);GO:0051236(establishment of RNA localization);GO:1900364(negative regulation of mRNA polyaden…	NA	K09276	NA
2	ENSDARG00000062485	dock11	1.17992	0.831088	0.505615	3.02119e-05	0.736899	dedicator of cytokinesis 11 [Source:ZFIN;Acc:ZDB-GENE-060503-196]	GO:0005085(guanyl-nucleotide exchange factor activity);GO:0007264(small GTPase mediated signal transduction)	NA	K21853	NA
2	ENSDARG00000027590	sept2	1.60394	1.1634	0.46327	3.17446e-05	0.774284	septin 2 [Source:ZFIN;Acc:ZDB-GENE-030131-911]	GO:0000166(nucleotide binding);GO:0003924(GTPase activity);GO:0005525(GTP binding);GO:0005940(septin ring);GO:0015630(microtubule cytoskeleton);GO:0031105(septin complex);GO:0032947(protein-containing complex scaffold activity);GO:0051301(cell division);GO:0060271(cilium assembly);GO:0061640(cytoskeleton-dependent cytokinesis)	NA	K16942	NA
2	ENSDARG00000039455	tspan15	0.346558	0.288783	0.263109	3.2115e-05	0.783317	tetraspanin 15 [Source:ZFIN;Acc:ZDB-GENE-050417-295]	GO:0003674(molecular_function);GO:0005887(integral component of plasma membrane);GO:0007166(cell surface receptor signaling pathway);GO:0016020(membrane);GO:0016021(integral component of membrane)	NA	K17297	NA
2	ENSDARG00000099175	hmgb1a	5.04057	3.69254	0.448972	3.38897e-05	0.826605	high mobility group box 1a [Source:ZFIN;Acc:ZDB-GENE-030131-341]	GO:0000790(nuclear chromatin);GO:0002218(activation of innate immune response);GO:0003677(DNA binding);GO:0005634(nucleus);GO:0005737(cytoplasm);GO:0005886(plasma membrane);GO:0006310(DNA recombination);GO:0006338(chromatin remodeling);GO:0006357(regulation of transcription by RNA polymerase II);GO:0008134(transcription factor binding);GO:0008301(DNA binding, bending);GO:0009409(response to cold)…	03410(Base excision repair);04140(Autophagy - animal);04217(Necroptosis)	K10802	NA
2	ENSDARG00000025375	idh1	0.937763	0.669277	0.486619	3.48948e-05	0.851119	isocitrate dehydrogenase 1 (NADP+), soluble [Source:ZFIN;Acc:ZDB-GENE-031006-1]	GO:0000287(magnesium ion binding);GO:0004450(isocitrate dehydrogenase (NADP+) activity);GO:0005777(peroxisome);GO:0005829(cytosol);GO:0006099(tricarboxylic acid cycle);GO:0006102(isocitrate metabolic process);GO:0006739(NADP metabolic process);GO:0016491(oxidoreductase activity);GO:0016616(oxidoreductase activity, acting on the CH-OH group of donors, NAD or NADP as acceptor);GO:0030097(hemopoiesi…	00020(Citrate cycle (TCA cycle));00480(Glutathione metabolism);04146(Peroxisome)	K00031	EC:1.1.1.42
2	ENSDARG00000012801	pfkpb	0.724257	0.53157	0.44624	3.56181e-05	0.868762	phosphofructokinase, platelet b [Source:ZFIN;Acc:ZDB-GENE-070912-634]	GO:0000166(nucleotide binding);GO:0003824(catalytic activity);GO:0003872(6-phosphofructokinase activity);GO:0005524(ATP binding);GO:0005737(cytoplasm);GO:0005945(6-phosphofructokinase complex);GO:0006002(fructose 6-phosphate metabolic process);GO:0006007(glucose catabolic process);GO:0006096(glycolytic process);GO:0008152(metabolic process);GO:0016208(AMP binding);GO:0016301(kinase activity);GO:0…	00010(Glycolysis / Gluconeogenesis);00030(Pentose phosphate pathway);00051(Fructose and mannose metabolism);00052(Galactose metabolism);03018(RNA degradation)	K00850	EC:2.7.1.11
2	ENSDARG00000031317	ppdpfb	2.64374	1.76502	0.582899	3.6126e-05	0.88115	pancreatic progenitor cell differentiation and proliferation factor b [Source:ZFIN;Acc:ZDB-GENE-030131-8247]	GO:0001708(cell fate specification);GO:0007275(multicellular organism development);GO:0030154(cell differentiation);GO:0031017(exocrine pancreas development)	NA	NA	NA
2	ENSDARG00000104179	rab11fip5a	0.28388	0.231864	0.292005	3.69383e-05	0.900963	RAB11 family interacting protein 5a (class I) [Source:ZFIN;Acc:ZDB-GENE-090313-206]	GO:0017137(Rab GTPase binding);GO:0043231(intracellular membrane-bounded organelle);GO:0045055(regulated exocytosis)	04144(Endocytosis)	K12484	NA
2	ENSDARG00000037057	gcdha	0.50043	0.38058	0.394966	3.91487e-05	0.954876	glutaryl-CoA dehydrogenase a [Source:ZFIN;Acc:ZDB-GENE-040426-1855]	GO:0003995(acyl-CoA dehydrogenase activity);GO:0005739(mitochondrion);GO:0016491(oxidoreductase activity);GO:0016627(oxidoreductase activity, acting on the CH-CH group of donors);GO:0050660(flavin adenine dinucleotide binding);GO:0055114(oxidation-reduction process)	00071(Fatty acid degradation);00310(Lysine degradation);00380(Tryptophan metabolism)	K00252	EC:1.3.8.6
2	ENSDARG00000025091	ezrb	2.02445	1.4595	0.472052	4.26815e-05	1	ezrin b [Source:ZFIN;Acc:ZDB-GENE-050803-1]	GO:0003779(actin binding);GO:0005856(cytoskeleton);GO:0008092(cytoskeletal protein binding);GO:0035850(epithelial cell differentiation involved in kidney development);GO:0042074(cell migration involved in gastrulation);GO:0060271(cilium assembly);GO:0090504(epiboly);GO:1902017(regulation of cilium assembly)	04530(Tight junction);04810(Regulation of actin cytoskeleton)	K08007	NA
2	ENSDARG00000017294	gnai2b	1.03816	0.82438	0.332648	4.41556e-05	1	guanine nucleotide binding protein (G protein), alpha inhibiting activity polypeptide 2b [Source:ZFIN;Acc:ZDB-GENE-030131-5861]	GO:0000166(nucleotide binding);GO:0001664(G protein-coupled receptor binding);GO:0003924(GTPase activity);GO:0005525(GTP binding);GO:0005834(heterotrimeric G-protein complex);GO:0007165(signal transduction);GO:0007186(G protein-coupled receptor signaling pathway);GO:0007188(adenylate cyclase-modulating G protein-coupled receptor signaling pathway);GO:0019001(guanyl nucleotide binding);GO:0031683(…	04261(Adrenergic signaling in cardiomyocytes);04371(Apelin signaling pathway);04540(Gap junction);04914(Progesterone-mediated oocyte maturation);04916(Melanogenesis)	K04630	NA
2	ENSDARG00000027109	zfr	1.10157	0.774454	0.50831	4.45892e-05	1	zinc finger RNA binding protein [Source:ZFIN;Acc:ZDB-GENE-030131-378]	GO:0003676(nucleic acid binding);GO:0008270(zinc ion binding)	NA	K13203	NA
2	ENSDARG00000077410	myo9b	0.855055	0.658467	0.376906	4.51156e-05	1	myosin IXb [Source:ZFIN;Acc:ZDB-GENE-030131-938]	GO:0000166(nucleotide binding);GO:0003774(motor activity);GO:0003779(actin binding);GO:0005096(GTPase activator activity);GO:0005524(ATP binding);GO:0007165(signal transduction);GO:0016459(myosin complex);GO:0035556(intracellular signal transduction);GO:0043547(positive regulation of GTPase activity);GO:0046872(metal ion binding)	NA	K10360	NA
2	ENSDARG00000074340	serf2	4.56199	3.5331	0.368732	5.03853e-05	1	small EDRK-rich factor 2 [Source:ZFIN;Acc:ZDB-GENE-041108-1]	NA	NA	NA	NA
2	ENSDARG00000111357	tnfsf14	4.8132	3.67128	0.390712	5.42633e-05	1	TNF superfamily member 14 [Source:ZFIN;Acc:ZDB-GENE-101109-3]	GO:0005164(tumor necrosis factor receptor binding);GO:0005515(protein binding);GO:0006955(immune response);GO:0016020(membrane);GO:0016021(integral component of membrane)	04060(Cytokine-cytokine receptor interaction);05168(Herpes simplex virus 1 infection)	K05477	NA
2	ENSDARG00000101251	ldha	8.06616	5.80988	0.473372	5.56454e-05	1	lactate dehydrogenase A4 [Source:ZFIN;Acc:ZDB-GENE-991026-5]	GO:0001666(response to hypoxia);GO:0003824(catalytic activity);GO:0004459(L-lactate dehydrogenase activity);GO:0005737(cytoplasm);GO:0005975(carbohydrate metabolic process);GO:0016491(oxidoreductase activity);GO:0016616(oxidoreductase activity, acting on the CH-OH group of donors, NAD or NADP as acceptor);GO:0019752(carboxylic acid metabolic process);GO:0055114(oxidation-reduction process)	00010(Glycolysis / Gluconeogenesis);00270(Cysteine and methionine metabolism);00620(Pyruvate metabolism);00640(Propanoate metabolism)	K00016	EC:1.1.1.27
2	ENSDARG00000019613	ip6k2b	2.48322	1.71667	0.532603	5.80766e-05	1	inositol hexakisphosphate kinase 2b [Source:ZFIN;Acc:ZDB-GENE-040718-85]	GO:0005575(cellular_component);GO:0016301(kinase activity);GO:0016310(phosphorylation);GO:0016740(transferase activity);GO:0032958(inositol phosphate biosynthetic process)	04070(Phosphatidylinositol signaling system)	K07756	EC:2.7.4.21
2	ENSDARG00000051836	si:dkeyp-19e1.3	2.13703	1.53674	0.475738	6.04657e-05	1	si:dkeyp-19e1.3 [Source:ZFIN;Acc:ZDB-GENE-081104-56]	GO:0005096(GTPase activator activity);GO:0005623(cell);GO:0006886(intracellular protein transport);GO:0017137(Rab GTPase binding);GO:0090630(activation of GTPase activity)	NA	K20133	NA
2	ENSDARG00000030938	fermt3b	0.575041	0.448432	0.358776	6.31818e-05	1	fermitin family member 3b [Source:ZFIN;Acc:ZDB-GENE-040426-1366]	GO:0007229(integrin-mediated signaling pathway)	NA	K17084	NA
2	ENSDARG00000103118	cib1	1.46185	1.05057	0.476625	6.4628e-05	1	calcium and integrin binding 1 (calmyrin) [Source:ZFIN;Acc:ZDB-GENE-050417-170]	GO:0005509(calcium ion binding)	NA	NA	NA
2	ENSDARG00000091656	lsm8	0.734244	0.567039	0.372811	6.50873e-05	1	LSM8 homolog, U6 small nuclear RNA associated [Source:ZFIN;Acc:ZDB-GENE-070629-3]	GO:0000398(mRNA splicing, via spliceosome);GO:0003723(RNA binding);GO:0005634(nucleus);GO:0005681(spliceosomal complex);GO:0005688(U6 snRNP);GO:0006397(mRNA processing);GO:0008380(RNA splicing);GO:0016070(RNA metabolic process);GO:0030217(T cell differentiation);GO:0046540(U4/U6 x U5 tri-snRNP complex)	03018(RNA degradation);03040(Spliceosome)	K12627	NA
2	ENSDARG00000022280	brd2a	6.5384	4.47298	0.547702	6.50932e-05	1	bromodomain containing 2a [Source:ZFIN;Acc:ZDB-GENE-990415-248]	GO:0002574(thrombocyte differentiation);GO:0003674(molecular_function);GO:0005515(protein binding);GO:0005575(cellular_component);GO:0021510(spinal cord development);GO:0030902(hindbrain development);GO:0030917(midbrain-hindbrain boundary development);GO:0042981(regulation of apoptotic process)	NA	K08871	NA
2	ENSDARG00000021372	tob1b	3.98608	2.79359	0.51285	6.68902e-05	1	transducer of ERBB2, 1b [Source:ZFIN;Acc:ZDB-GENE-040426-2151]	GO:0003714(transcription corepressor activity);GO:0005634(nucleus);GO:0005737(cytoplasm);GO:0008285(negative regulation of cell population proliferation);GO:0010468(regulation of gene expression);GO:1903507(negative regulation of nucleic acid-templated transcription)	03018(RNA degradation)	K14443	NA
2	ENSDARG00000010384	lpar5a	1.50192	1.05813	0.505295	6.90977e-05	1	lysophosphatidic acid receptor 5a [Source:ZFIN;Acc:ZDB-GENE-030131-1193]	GO:0004930(G protein-coupled receptor activity);GO:0007186(G protein-coupled receptor signaling pathway);GO:0016020(membrane);GO:0016021(integral component of membrane)	NA	NA	NA
2	ENSDARG00000056008	atp5mc1	1.6637	1.25118	0.411107	7.41513e-05	1	ATP synthase membrane subunit c locus 1 [Source:ZFIN;Acc:ZDB-GENE-040426-1966]	GO:0000276(mitochondrial proton-transporting ATP synthase complex, coupling factor F(o));GO:0006811(ion transport);GO:0008289(lipid binding);GO:0015078(proton transmembrane transporter activity);GO:0015986(ATP synthesis coupled proton transport);GO:0015991(ATP hydrolysis coupled proton transport);GO:0016020(membrane);GO:0016021(integral component of membrane);GO:0033177(proton-transporting two-se…	00190(Oxidative phosphorylation)	K02128	NA
2	ENSDARG00000013078	ywhaba	3.96682	3.22356	0.299328	7.66221e-05	1	tyrosine 3-monooxygenase/tryptophan 5-monooxygenase activation protein, beta polypeptide a [Source:ZFIN;Acc:ZDB-GENE-030131-6583]	GO:0005737(cytoplasm);GO:0006911(phagocytosis, engulfment);GO:0019904(protein domain specific binding)	04110(Cell cycle);04114(Oocyte meiosis)	K16197	NA
2	ENSDARG00000005350	dip2ba	1.15768	0.813699	0.508667	7.8103e-05	1	disco-interacting protein 2 homolog Ba [Source:ZFIN;Acc:ZDB-GENE-040426-2305]	GO:0003824(catalytic activity)	NA	NA	NA
2	ENSDARG00000025011	synj1	0.36771	0.30113	0.28818	8.17977e-05	1	synaptojanin 1 [Source:ZFIN;Acc:ZDB-GENE-030131-9180]	GO:0003676(nucleic acid binding);GO:0003723(RNA binding);GO:0004439(phosphatidylinositol-4,5-bisphosphate 5-phosphatase activity);GO:0005623(cell);GO:0007268(chemical synaptic transmission);GO:0009584(detection of visible light);GO:0016787(hydrolase activity);GO:0017124(SH3 domain binding);GO:0034595(phosphatidylinositol phosphate 5-phosphatase activity);GO:0034596(phosphatidylinositol phosphate …	00562(Inositol phosphate metabolism);04070(Phosphatidylinositol signaling system)	K20279	EC:3.1.3.36
2	ENSDARG00000003308	emc2	0.841377	0.62332	0.432779	8.3936e-05	1	ER membrane protein complex subunit 2 [Source:ZFIN;Acc:ZDB-GENE-040625-82]	GO:0005515(protein binding);GO:0005634(nucleus);GO:0005737(cytoplasm);GO:0005783(endoplasmic reticulum);GO:0034975(protein folding in endoplasmic reticulum);GO:0072546(ER membrane protein complex)	NA	NA	NA
2	ENSDARG00000017489	ifi45	0.516118	0.378708	0.446612	8.6025e-05	1	interferon alpha inducible protein 45 [Source:ZFIN;Acc:ZDB-GENE-051030-98]	GO:0003674(molecular_function);GO:0005739(mitochondrion);GO:0008150(biological_process);GO:0016020(membrane);GO:0016021(integral component of membrane)	NA	NA	NA
2	ENSDARG00000011934	gyg1a	0.895986	0.670017	0.419278	8.73146e-05	1	glycogenin 1a [Source:ZFIN;Acc:ZDB-GENE-040426-2910]	GO:0016740(transferase activity);GO:0016757(transferase activity, transferring glycosyl groups)	00500(Starch and sucrose metabolism)	K00750	EC:2.4.1.186
2	ENSDARG00000088493	si:ch211-149k12.3	0.708413	0.520499	0.444696	8.99846e-05	1	si:ch211-149k12.3 [Source:ZFIN;Acc:ZDB-GENE-131127-504]	NA	NA	NA	NA
2	ENSDARG00000069397	zswim8	0.525479	0.41035	0.356778	9.39461e-05	1	zinc finger, SWIM-type containing 8 [Source:ZFIN;Acc:ZDB-GENE-050320-59]	GO:0005575(cellular_component);GO:0008270(zinc ion binding);GO:0031462(Cul2-RING ubiquitin ligase complex);GO:1902667(regulation of axon guidance)	NA	NA	NA
2	ENSDARG00000007682	ppdpfa	0.599332	0.452789	0.404516	0.000115384	1	pancreatic progenitor cell differentiation and proliferation factor a [Source:ZFIN;Acc:ZDB-GENE-030219-204]	GO:0001708(cell fate specification);GO:0007275(multicellular organism development);GO:0008283(cell population proliferation);GO:0030154(cell differentiation);GO:0031017(exocrine pancreas development)	NA	NA	NA
2	ENSDARG00000021257	eif3d	2.48493	1.86234	0.41609	0.000122817	1	eukaryotic translation initiation factor 3, subunit D [Source:ZFIN;Acc:ZDB-GENE-030131-8442]	GO:0001732(formation of cytoplasmic translation initiation complex);GO:0002183(cytoplasmic translational initiation);GO:0002191(cap-dependent translational initiation);GO:0003723(RNA binding);GO:0003743(translation initiation factor activity);GO:0005737(cytoplasm);GO:0005852(eukaryotic translation initiation factor 3 complex);GO:0006412(translation);GO:0006413(translational initiation);GO:0016282…	03013(RNA transport)	K03251	NA
2	ENSDARG00000031200	ppp2r5cb	1.08451	0.769781	0.494517	0.000125666	1	protein phosphatase 2, regulatory subunit B', gamma b [Source:ZFIN;Acc:ZDB-GENE-041014-4]	GO:0000159(protein phosphatase type 2A complex);GO:0005634(nucleus);GO:0005829(cytosol);GO:0006470(protein dephosphorylation);GO:0007165(signal transduction);GO:0019888(protein phosphatase regulator activity);GO:0031952(regulation of protein autophosphorylation);GO:0043666(regulation of phosphoprotein phosphatase activity);GO:0072542(protein phosphatase activator activity)	03015(mRNA surveillance pathway);04114(Oocyte meiosis);04261(Adrenergic signaling in cardiomyocytes)	K11584	NA
2	ENSDARG00000029688	hsp70.1	0.627068	0.47878	0.389261	0.000131095	1	heat shock cognate 70-kd protein, tandem duplicate 1 [Source:ZFIN;Acc:ZDB-GENE-990415-91]	GO:0000166(nucleotide binding);GO:0005524(ATP binding);GO:0005634(nucleus);GO:0005737(cytoplasm);GO:0009408(response to heat);GO:0009410(response to xenobiotic stimulus);GO:0046686(response to cadmium ion);GO:0048593(camera-type eye morphogenesis)	03040(Spliceosome);04010(MAPK signaling pathway);04141(Protein processing in endoplasmic reticulum);04144(Endocytosis)	K03283	NA
2	ENSDARG00000043795	arhgdia	3.59304	2.65013	0.439142	0.000133987	1	Rho GDP dissociation inhibitor (GDI) alpha [Source:ZFIN;Acc:ZDB-GENE-040426-2816]	GO:0005094(Rho GDP-dissociation inhibitor activity);GO:0005737(cytoplasm);GO:0005829(cytosol);GO:0007264(small GTPase mediated signal transduction);GO:0007266(Rho protein signal transduction);GO:0016020(membrane);GO:0048365(Rac GTPase binding);GO:0050790(regulation of catalytic activity)	NA	K12462	NA
2	ENSDARG00000014333	ormdl1	0.442493	0.350861	0.334755	0.000140747	1	ORMDL sphingolipid biosynthesis regulator 1 [Source:ZFIN;Acc:ZDB-GENE-030616-529]	GO:0005783(endoplasmic reticulum);GO:0005789(endoplasmic reticulum membrane);GO:0006672(ceramide metabolic process);GO:0016020(membrane);GO:0016021(integral component of membrane);GO:0035339(SPOTS complex);GO:0090155(negative regulation of sphingolipid biosynthetic process);GO:0090156(cellular sphingolipid homeostasis);GO:1900060(negative regulation of ceramide biosynthetic process)	NA	NA	NA
2	ENSDARG00000015199	cblb	0.883377	0.66882	0.401411	0.000145049	1	Cbl proto-oncogene B, E3 ubiquitin protein ligase [Source:ZFIN;Acc:ZDB-GENE-030616-417]	GO:0001784(phosphotyrosine residue binding);GO:0004842(ubiquitin-protein transferase activity);GO:0005509(calcium ion binding);GO:0005886(plasma membrane);GO:0007165(signal transduction);GO:0007166(cell surface receptor signaling pathway);GO:0007175(negative regulation of epidermal growth factor-activated receptor activity);GO:0016567(protein ubiquitination);GO:0017124(SH3 domain binding);GO:0023…	04012(ErbB signaling pathway);04120(Ubiquitin mediated proteolysis);04144(Endocytosis);04625(C-type lectin receptor signaling pathway);04910(Insulin signaling pathway)	K22517	EC:2.3.2.27
2	ENSDARG00000011553	atp5pb	2.08478	1.5898	0.39105	0.000150922	1	ATP synthase peripheral stalk-membrane subunit b [Source:ZFIN;Acc:ZDB-GENE-041010-33]	GO:0000276(mitochondrial proton-transporting ATP synthase complex, coupling factor F(o));GO:0015078(proton transmembrane transporter activity);GO:0015986(ATP synthesis coupled proton transport);GO:0046933(proton-transporting ATP synthase activity, rotational mechanism);GO:0099132(ATP hydrolysis coupled cation transmembrane transport)	00190(Oxidative phosphorylation)	K02127	NA
2	ENSDARG00000019404	atp5f1d	1.98344	1.45929	0.442741	0.000151892	1	ATP synthase F1 subunit delta [Source:ZFIN;Acc:ZDB-GENE-030131-7649]	GO:0000275(mitochondrial proton-transporting ATP synthase complex, catalytic core F(1));GO:0015986(ATP synthesis coupled proton transport);GO:0045261(proton-transporting ATP synthase complex, catalytic core F(1));GO:0046933(proton-transporting ATP synthase activity, rotational mechanism);GO:0099132(ATP hydrolysis coupled cation transmembrane transport)	00190(Oxidative phosphorylation)	K02134	NA
2	ENSDARG00000088612	si:ch211-153b23.7	9.08864	6.65386	0.449873	0.00015659	1	si:ch211-153b23.7 [Source:ZFIN;Acc:ZDB-GENE-141216-14]	GO:0002755(MyD88-dependent toll-like receptor signaling pathway);GO:0043124(negative regulation of I-kappaB kinase/NF-kappaB signaling);GO:0050727(regulation of inflammatory response);GO:0070373(negative regulation of ERK1 and ERK2 cascade)	NA	NA	NA
2	ENSDARG00000074057	calm3b	1.52649	1.10983	0.459876	0.000161497	1	calmodulin 3b (phosphorylase kinase, delta) [Source:ZFIN;Acc:ZDB-GENE-030131-527]	GO:0005509(calcium ion binding);GO:0019722(calcium-mediated signaling);GO:0046872(metal ion binding)	04020(Calcium signaling pathway);04070(Phosphatidylinositol signaling system);04114(Oocyte meiosis);04218(Cellular senescence);04261(Adrenergic signaling in cardiomyocytes);04270(Vascular smooth muscle contraction);04371(Apelin signaling pathway);04625(C-type lectin receptor signaling pathway);04744(Phototransduction);04910(Insulin signaling pathway);04912(GnRH signaling pathway);04916(Melanogene…	K02183	NA
2	ENSDARG00000059357	sarnp	1.33868	1.0047	0.414051	0.000162238	1	SAP domain containing ribonucleoprotein [Source:ZFIN;Acc:ZDB-GENE-050522-161]	GO:0005575(cellular_component);GO:0008150(biological_process)	NA	K18732	NA
2	ENSDARG00000100371	eef2b	18.3293	14.712	0.317161	0.000164913	1	eukaryotic translation elongation factor 2b [Source:ZFIN;Acc:ZDB-GENE-030131-5128]	GO:0003746(translation elongation factor activity);GO:0003924(GTPase activity);GO:0005525(GTP binding);GO:0005829(cytosol);GO:0006414(translational elongation);GO:0043009(chordate embryonic development);GO:0043022(ribosome binding);GO:0071466(cellular response to xenobiotic stimulus);GO:1990904(ribonucleoprotein complex)	NA	K03234	NA
2	ENSDARG00000101094	ATP11B	0.977186	0.73956	0.401965	0.00016653	1	si:dkey-211e20.10 [Source:ZFIN;Acc:ZDB-GENE-081031-13]	GO:0000166(nucleotide binding);GO:0000287(magnesium ion binding);GO:0004012(phospholipid-translocating ATPase activity);GO:0005524(ATP binding);GO:0005783(endoplasmic reticulum);GO:0005802(trans-Golgi network);GO:0005886(plasma membrane);GO:0015914(phospholipid transport);GO:0016020(membrane);GO:0016021(integral component of membrane);GO:0045332(phospholipid translocation);GO:0055037(recycling en…	NA	K01530	EC:7.6.2.1
2	ENSDARG00000035420	ophn1	0.456619	0.347491	0.394015	0.000170604	1	oligophrenin 1 [Source:ZFIN;Acc:ZDB-GENE-040718-464]	GO:0005096(GTPase activator activity);GO:0007165(signal transduction);GO:0043547(positive regulation of GTPase activity)	NA	NA	NA
2	ENSDARG00000028086	zbtb2b	0.949877	0.719169	0.40141	0.000177425	1	zinc finger and BTB domain containing 2b [Source:ZFIN;Acc:ZDB-GENE-040426-2753]	GO:0003676(nucleic acid binding);GO:0005515(protein binding)	NA	K10489	NA
2	ENSDARG00000013379	ppp6r3	0.93187	0.737061	0.338345	0.000177734	1	protein phosphatase 6, regulatory subunit 3 [Source:ZFIN;Acc:ZDB-GENE-030131-3251]	GO:0003674(molecular_function);GO:0005575(cellular_component);GO:0008150(biological_process)	NA	K15501	NA
2	ENSDARG00000104676	prkd2	0.662243	0.484457	0.450993	0.000179291	1	protein kinase D2 [Source:ZFIN;Acc:ZDB-GENE-131120-142]	GO:0000166(nucleotide binding);GO:0003272(endocardial cushion formation);GO:0004672(protein kinase activity);GO:0004674(protein serine/threonine kinase activity);GO:0004697(protein kinase C activity);GO:0005524(ATP binding);GO:0006468(protein phosphorylation);GO:0089700(protein kinase D signaling)	NA	K06070	EC:2.7.11.13
2	ENSDARG00000044281	erbin	2.03271	1.46881	0.468758	0.000179596	1	erbb2 interacting protein [Source:ZFIN;Acc:ZDB-GENE-061103-403]	GO:0005176(ErbB-2 class receptor binding);GO:0005515(protein binding);GO:0005911(cell-cell junction);GO:0005913(cell-cell adherens junction);GO:0007165(signal transduction);GO:0008328(ionotropic glutamate receptor complex);GO:0014069(postsynaptic density);GO:0016323(basolateral plasma membrane);GO:0030054(cell junction);GO:0032088(negative regulation of NF-kappaB transcription factor activity);GO…	04621(NOD-like receptor signaling pathway)	K12796	NA
2	ENSDARG00000016443	eif3c	2.94774	2.20357	0.419767	0.000179986	1	eukaryotic translation initiation factor 3, subunit C [Source:ZFIN;Acc:ZDB-GENE-030131-6166]	GO:0001732(formation of cytoplasmic translation initiation complex);GO:0002183(cytoplasmic translational initiation);GO:0003723(RNA binding);GO:0003743(translation initiation factor activity);GO:0005737(cytoplasm);GO:0005852(eukaryotic translation initiation factor 3 complex);GO:0006412(translation);GO:0006413(translational initiation);GO:0016282(eukaryotic 43S preinitiation complex);GO:0031369(t…	03013(RNA transport)	K03252	NA
2	ENSDARG00000015752	zap70	0.422289	0.322378	0.389477	0.000182755	1	zeta chain of T cell receptor associated protein kinase 70 [Source:ZFIN;Acc:ZDB-GENE-050522-257]	GO:0000166(nucleotide binding);GO:0001946(lymphangiogenesis);GO:0004672(protein kinase activity);GO:0004713(protein tyrosine kinase activity);GO:0004715(non-membrane spanning protein tyrosine kinase activity);GO:0005524(ATP binding);GO:0005737(cytoplasm);GO:0006468(protein phosphorylation);GO:0016301(kinase activity);GO:0016310(phosphorylation);GO:0016740(transferase activity);GO:0018108(peptidyl…	NA	K07360	EC:2.7.10.2
2	ENSDARG00000008706	paip2b	1.58583	1.15979	0.451385	0.000186033	1	poly(A) binding protein interacting protein 2B [Source:ZFIN;Acc:ZDB-GENE-040426-1736]	GO:0000900(translation repressor activity, mRNA regulatory element binding);GO:0003674(molecular_function);GO:0005575(cellular_component);GO:0008150(biological_process);GO:0045947(negative regulation of translational initiation)	NA	NA	NA
2	ENSDARG00000100947	mafk	0.448031	0.360272	0.314509	0.00019307	1	v-maf avian musculoaponeurotic fibrosarcoma oncogene homolog K [Source:ZFIN;Acc:ZDB-GENE-040624-9]	GO:0000976(transcription regulatory region sequence-specific DNA binding);GO:0000978(RNA polymerase II proximal promoter sequence-specific DNA binding);GO:0003677(DNA binding);GO:0003700(DNA-binding transcription factor activity);GO:0005634(nucleus);GO:0005667(transcription factor complex);GO:0006351(transcription, DNA-templated);GO:0006355(regulation of transcription, DNA-templated);GO:0043565(s…	NA	K09037	NA
2	ENSDARG00000029064	uqcrq	2.53802	1.93878	0.388551	0.000193259	1	ubiquinol-cytochrome c reductase, complex III subunit VII [Source:ZFIN;Acc:ZDB-GENE-040718-199]	GO:0005750(mitochondrial respiratory chain complex III);GO:0006122(mitochondrial electron transport, ubiquinol to cytochrome c);GO:0008121(ubiquinol-cytochrome-c reductase activity)	00190(Oxidative phosphorylation);04260(Cardiac muscle contraction)	K00418	NA
2	ENSDARG00000079366	ppp1r9ba	1.33269	0.964531	0.466444	0.000195563	1	protein phosphatase 1, regulatory subunit 9Ba [Source:ZFIN;Acc:ZDB-GENE-091006-1]	GO:0003779(actin binding);GO:0005515(protein binding);GO:0005737(cytoplasm);GO:0007015(actin filament organization);GO:0008157(protein phosphatase 1 binding);GO:0014069(postsynaptic density);GO:0015629(actin cytoskeleton);GO:0019722(calcium-mediated signaling);GO:0030425(dendrite);GO:0031175(neuron projection development);GO:0042127(regulation of cell population proliferation);GO:0050804(modulati…	NA	K17551	NA
2	ENSDARG00000073926	synrg	0.770483	0.603121	0.353317	0.000204788	1	synergin, gamma [Source:ZFIN;Acc:ZDB-GENE-030131-9396]	GO:0005515(protein binding)	NA	NA	NA
2	ENSDARG00000002552	mapkapk2a	2.66364	2.09645	0.345449	0.00021018	1	mitogen-activated protein kinase-activated protein kinase 2a [Source:ZFIN;Acc:ZDB-GENE-030131-5532]	GO:0000166(nucleotide binding);GO:0004672(protein kinase activity);GO:0004674(protein serine/threonine kinase activity);GO:0004683(calmodulin-dependent protein kinase activity);GO:0005516(calmodulin binding);GO:0005524(ATP binding);GO:0005634(nucleus);GO:0005737(cytoplasm);GO:0006468(protein phosphorylation);GO:0009931(calcium-dependent protein serine/threonine kinase activity);GO:0016301(kinase …	04010(MAPK signaling pathway);04218(Cellular senescence);04370(VEGF signaling pathway);04625(C-type lectin receptor signaling pathway)	K04443	EC:2.7.11.1
2	ENSDARG00000016904	bckdk	0.36023	0.298985	0.268847	0.000216989	1	branched chain ketoacid dehydrogenase kinase [Source:ZFIN;Acc:ZDB-GENE-021204-1]	GO:0004672(protein kinase activity);GO:0006468(protein phosphorylation);GO:0016310(phosphorylation);GO:0016772(transferase activity, transferring phosphorus-containing groups)	NA	K00905	EC:2.7.11.4
2	ENSDARG00000075201	inpp4b	0.404766	0.332595	0.283321	0.000222166	1	inositol polyphosphate-4-phosphatase type II B [Source:ZFIN;Acc:ZDB-GENE-090312-97]	GO:0005737(cytoplasm);GO:0016316(phosphatidylinositol-3,4-bisphosphate 4-phosphatase activity);GO:0036092(phosphatidylinositol-3-phosphate biosynthetic process)	00562(Inositol phosphate metabolism);04070(Phosphatidylinositol signaling system)	K01109	EC:3.1.3.66
2	ENSDARG00000053232	itgb1b.1	0.314533	0.256289	0.295438	0.000228727	1	integrin, beta 1b.1 [Source:ZFIN;Acc:ZDB-GENE-060803-3]	GO:0001968(fibronectin binding);GO:0005178(integrin binding);GO:0005925(focal adhesion);GO:0007155(cell adhesion);GO:0007160(cell-matrix adhesion);GO:0007229(integrin-mediated signaling pathway);GO:0008305(integrin complex);GO:0009986(cell surface);GO:0016020(membrane);GO:0016021(integral component of membrane);GO:0016477(cell migration);GO:0033627(cell adhesion mediated by integrin);GO:0038023(s…	NA	NA	NA
2	ENSDARG00000012915	ech1	0.42195	0.341133	0.306735	0.000233667	1	enoyl CoA hydratase 1, peroxisomal [Source:ZFIN;Acc:ZDB-GENE-041010-170]	GO:0003824(catalytic activity);GO:0005739(mitochondrion);GO:0051750(delta3,5-delta2,4-dienoyl-CoA isomerase activity)	04146(Peroxisome)	K12663	EC:5.3.3.21
2	ENSDARG00000061735	hnrnpm	1.42594	1.05209	0.43865	0.000240739	1	heterogeneous nuclear ribonucleoprotein M [Source:ZFIN;Acc:ZDB-GENE-030131-6898]	GO:0000398(mRNA splicing, via spliceosome);GO:0003676(nucleic acid binding);GO:0003723(RNA binding);GO:0003729(mRNA binding);GO:0005634(nucleus);GO:0005737(cytoplasm);GO:0071014(post-mRNA release spliceosomal complex);GO:1990904(ribonucleoprotein complex);GO:2000815(regulation of mRNA stability involved in response to oxidative stress)	03040(Spliceosome)	K12887	NA
2	ENSDARG00000098355	atp5pd	2.17293	1.71878	0.338261	0.00024158	1	ATP synthase peripheral stalk subunit d [Source:ZFIN;Acc:ZDB-GENE-040426-1658]	GO:0000274(mitochondrial proton-transporting ATP synthase, stator stalk);GO:0000276(mitochondrial proton-transporting ATP synthase complex, coupling factor F(o));GO:0005739(mitochondrion);GO:0005743(mitochondrial inner membrane);GO:0006811(ion transport);GO:0015078(proton transmembrane transporter activity);GO:0015986(ATP synthesis coupled proton transport);GO:0016020(membrane);GO:0046933(proton-…	00190(Oxidative phosphorylation)	K02138	NA
2	ENSDARG00000101626	arf6a	1.79104	1.30101	0.461175	0.000244238	1	ADP-ribosylation factor 6a [Source:ZFIN;Acc:ZDB-GENE-030131-8007]	GO:0000166(nucleotide binding);GO:0001726(ruffle);GO:0005525(GTP binding);GO:0005737(cytoplasm);GO:0005768(endosome);GO:0006886(intracellular protein transport);GO:0016192(vesicle-mediated transport);GO:0030139(endocytic vesicle);GO:0035622(intrahepatic bile duct development);GO:0036010(protein localization to endosome);GO:0055038(recycling endosome membrane);GO:0055113(epiboly involved in gastru…	04144(Endocytosis)	K07941	NA
2	ENSDARG00000055857	dop1b	0.534664	0.416717	0.359562	0.00024494	1	DOP1 leucine zipper like protein B [Source:ZFIN;Acc:ZDB-GENE-040426-1195]	GO:0003674(molecular_function);GO:0005768(endosome);GO:0005802(trans-Golgi network);GO:0005829(cytosol);GO:0006895(Golgi to endosome transport)	NA	NA	NA
2	ENSDARG00000003866	tm9sf2	1.15609	0.899511	0.362038	0.000246106	1	transmembrane 9 superfamily member 2 [Source:ZFIN;Acc:ZDB-GENE-030131-6302]	GO:0016020(membrane);GO:0016021(integral component of membrane);GO:0072657(protein localization to membrane)	NA	K17086	NA
2	ENSDARG00000045399	cct5	2.29609	1.73835	0.401463	0.000273549	1	chaperonin containing TCP1, subunit 5 (epsilon) [Source:ZFIN;Acc:ZDB-GENE-030131-977]	GO:0000166(nucleotide binding);GO:0005524(ATP binding);GO:0005737(cytoplasm);GO:0005832(chaperonin-containing T-complex);GO:0006457(protein folding);GO:0030240(skeletal muscle thin filament assembly);GO:0051082(unfolded protein binding)	NA	K09497	NA
2	ENSDARG00000062748	pkn1b	0.531987	0.411289	0.371239	0.000282878	1	protein kinase N1b [Source:ZFIN;Acc:ZDB-GENE-070424-87]	GO:0000166(nucleotide binding);GO:0004672(protein kinase activity);GO:0004674(protein serine/threonine kinase activity);GO:0005524(ATP binding);GO:0006468(protein phosphorylation);GO:0007165(signal transduction);GO:0016301(kinase activity);GO:0016310(phosphorylation);GO:0016740(transferase activity);GO:0017049(GTP-Rho binding);GO:0018105(peptidyl-serine phosphorylation);GO:0035556(intracellular s…	05132(Salmonella infection)	K06071	EC:2.7.11.13
2	ENSDARG00000055713	fmnl1a	2.54641	1.79728	0.502647	0.000286483	1	formin-like 1a [Source:ZFIN;Acc:ZDB-GENE-120215-83]	GO:0003779(actin binding);GO:0007010(cytoskeleton organization);GO:0008360(regulation of cell shape);GO:0016043(cellular component organization);GO:0017048(Rho GTPase binding);GO:0030036(actin cytoskeleton organization)	NA	NA	NA
2	ENSDARG00000056090	capza1b	2.30389	1.66017	0.472745	0.000296143	1	capping actin protein of muscle Z-line subunit alpha 1b [Source:ZFIN;Acc:ZDB-GENE-031002-24]	GO:0003779(actin binding);GO:0008290(F-actin capping protein complex);GO:0030036(actin cytoskeleton organization);GO:0030479(actin cortical patch);GO:0051015(actin filament binding);GO:0051016(barbed-end actin filament capping);GO:0051693(actin filament capping)	04144(Endocytosis)	K10364	NA
2	ENSDARG00000011555	spag7	0.445532	0.348066	0.356172	0.0002965	1	sperm associated antigen 7 [Source:ZFIN;Acc:ZDB-GENE-040426-1632]	GO:0003676(nucleic acid binding)	NA	NA	NA
2	ENSDARG00000053446	sub1a	1.00791	0.811278	0.313093	0.000303661	1	SUB1 homolog, transcriptional regulator a [Source:ZFIN;Acc:ZDB-GENE-050522-151]	GO:0003677(DNA binding);GO:0003713(transcription coactivator activity);GO:0005634(nucleus);GO:0005667(transcription factor complex);GO:0006355(regulation of transcription, DNA-templated);GO:0060261(positive regulation of transcription initiation from RNA polymerase II promoter)	NA	NA	NA
2	ENSDARG00000031680	ercc1	0.306863	0.254813	0.268157	0.000304777	1	excision repair cross-complementation group 1 [Source:ZFIN;Acc:ZDB-GENE-040426-2606]	GO:0000014(single-stranded DNA endodeoxyribonuclease activity);GO:0000110(nucleotide-excision repair factor 1 complex);GO:0000710(meiotic mismatch repair);GO:0003684(damaged DNA binding);GO:0003697(single-stranded DNA binding);GO:0004519(endonuclease activity);GO:0005634(nucleus);GO:0006281(DNA repair);GO:0006296(nucleotide-excision repair, DNA incision, 5'-to lesion);GO:0006312(mitotic recombina…	03420(Nucleotide excision repair);03460(Fanconi anemia pathway)	K10849	NA
2	ENSDARG00000074498	chd9	1.36249	0.973332	0.485239	0.000308282	1	chromodomain helicase DNA binding protein 9 [Source:ZFIN;Acc:ZDB-GENE-030131-497]	GO:0005515(protein binding);GO:0005524(ATP binding);GO:0005634(nucleus);GO:0016817(hydrolase activity, acting on acid anhydrides)	NA	K14438	EC:3.6.4.12
2	ENSDARG00000058128	msna	8.43534	6.58465	0.357339	0.000314348	1	moesin a [Source:ZFIN;Acc:ZDB-GENE-021211-2]	GO:0003779(actin binding);GO:0005856(cytoskeleton);GO:0007492(endoderm development);GO:0008092(cytoskeletal protein binding);GO:0072554(blood vessel lumenization)	04530(Tight junction);04810(Regulation of actin cytoskeleton)	K05763	NA
2	ENSDARG00000058504	ap1s2	0.554701	0.435087	0.350406	0.000315526	1	adaptor related protein complex 1 subunit sigma 2 [Source:ZFIN;Acc:ZDB-GENE-030131-5448]	GO:0005623(cell);GO:0006886(intracellular protein transport);GO:0015031(protein transport);GO:0016020(membrane);GO:0016192(vesicle-mediated transport);GO:0030117(membrane coat)	04142(Lysosome)	K12394	NA
2	ENSDARG00000002745	tdh	2.4565	1.70527	0.526601	0.000321686	1	L-threonine dehydrogenase [Source:ZFIN;Acc:ZDB-GENE-040426-2379]	GO:0003824(catalytic activity);GO:0050662(coenzyme binding)	00260(Glycine, serine and threonine metabolism)	K15789	EC:1.1.1.103
2	ENSDARG00000056186	eif5a2	2.27113	1.77167	0.358299	0.000327448	1	eukaryotic translation initiation factor 5A2 [Source:ZFIN;Acc:ZDB-GENE-040426-2405]	GO:0003723(RNA binding);GO:0003746(translation elongation factor activity);GO:0006412(translation);GO:0006452(translational frameshifting);GO:0043022(ribosome binding);GO:0045901(positive regulation of translational elongation);GO:0045905(positive regulation of translational termination)	NA	K03263	NA
2	ENSDARG00000008884	hprt1	0.370972	0.303357	0.290293	0.000333352	1	hypoxanthine phosphoribosyltransferase 1 [Source:ZFIN;Acc:ZDB-GENE-040426-1918]	GO:0000166(nucleotide binding);GO:0000287(magnesium ion binding);GO:0004422(hypoxanthine phosphoribosyltransferase activity);GO:0005737(cytoplasm);GO:0006166(purine ribonucleoside salvage);GO:0006168(adenine salvage);GO:0006178(guanine salvage);GO:0009116(nucleoside metabolic process);GO:0016740(transferase activity);GO:0016757(transferase activity, transferring glycosyl groups);GO:0032263(GMP sa…	00230(Purine metabolism);00983(Drug metabolism - other enzymes)	K00760	EC:2.4.2.8
2	ENSDARG00000069175	vps4b	2.15988	1.6023	0.430809	0.000341749	1	vacuolar protein sorting 4b homolog B (S. cerevisiae) [Source:ZFIN;Acc:ZDB-GENE-040426-1235]	GO:0000166(nucleotide binding);GO:0005524(ATP binding);GO:0005634(nucleus);GO:0007033(vacuole organization);GO:0016887(ATPase activity);GO:0042476(odontogenesis)	04144(Endocytosis);04217(Necroptosis)	K12196	NA
2	ENSDARG00000020258	ewsr1a	0.424178	0.352742	0.266054	0.000345036	1	EWS RNA-binding protein 1a [Source:ZFIN;Acc:ZDB-GENE-030131-2317]	GO:0000278(mitotic cell cycle);GO:0003676(nucleic acid binding);GO:0003682(chromatin binding);GO:0003723(RNA binding);GO:0005515(protein binding);GO:0005634(nucleus);GO:0006355(regulation of transcription, DNA-templated);GO:0007088(regulation of mitotic nuclear division);GO:0021954(central nervous system neuron development);GO:0046872(metal ion binding);GO:0051256(mitotic spindle midzone assembly…	NA	K13209	NA
2	ENSDARG00000029474	camk1b	0.905437	0.708762	0.353312	0.000346721	1	calcium/calmodulin-dependent protein kinase Ib [Source:ZFIN;Acc:ZDB-GENE-141014-1]	GO:0000166(nucleotide binding);GO:0004672(protein kinase activity);GO:0004674(protein serine/threonine kinase activity);GO:0004683(calmodulin-dependent protein kinase activity);GO:0005516(calmodulin binding);GO:0005524(ATP binding);GO:0006468(protein phosphorylation)	04020(Calcium signaling pathway)	K08794	EC:2.7.11.17
2	ENSDARG00000086789	bahd1	0.805646	0.623267	0.370297	0.00037167	1	bromo adjacent homology domain containing 1 [Source:ZFIN;Acc:ZDB-GENE-120411-42]	GO:0003682(chromatin binding)	NA	NA	NA
2	ENSDARG00000070083	atp5f1b	3.89243	3.18228	0.290611	0.000378126	1	ATP synthase F1 subunit beta [Source:ZFIN;Acc:ZDB-GENE-030131-124]	GO:0000166(nucleotide binding);GO:0005524(ATP binding);GO:0006754(ATP biosynthetic process);GO:0015986(ATP synthesis coupled proton transport);GO:0045261(proton-transporting ATP synthase complex, catalytic core F(1));GO:0046034(ATP metabolic process);GO:0046933(proton-transporting ATP synthase activity, rotational mechanism);GO:0099132(ATP hydrolysis coupled cation transmembrane transport);GO:190…	00190(Oxidative phosphorylation)	K02133	EC:7.1.2.2
2	ENSDARG00000079333	cd40lg	0.351493	0.289154	0.281656	0.00040239	1	CD40 ligand [Source:ZFIN;Acc:ZDB-GENE-100727-1]	GO:0002639(positive regulation of immunoglobulin production);GO:0005125(cytokine activity);GO:0005164(tumor necrosis factor receptor binding);GO:0005515(protein binding);GO:0005615(extracellular space);GO:0006955(immune response);GO:0009897(external side of plasma membrane);GO:0010469(regulation of signaling receptor activity);GO:0016020(membrane);GO:0016021(integral component of membrane)	04060(Cytokine-cytokine receptor interaction);04514(Cell adhesion molecules (CAMs));04672(Intestinal immune network for IgA production)	K03161	NA
2	ENSDARG00000071261	zmp:0000001139	0.998497	0.762182	0.389623	0.000402559	1	zmp:0000001139 [Source:ZFIN;Acc:ZDB-GENE-140106-99]	GO:0016020(membrane);GO:0016021(integral component of membrane)	NA	NA	NA
2	ENSDARG00000101050	tmc8	1.32375	1.00106	0.40311	0.000416365	1	transmembrane channel-like 8 [Source:ZFIN;Acc:ZDB-GENE-081114-2]	GO:0005216(ion channel activity);GO:0005887(integral component of plasma membrane);GO:0008381(mechanosensitive ion channel activity);GO:0016020(membrane);GO:0016021(integral component of membrane);GO:0034220(ion transmembrane transport);GO:0055085(transmembrane transport)	NA	K21988	NA
2	ENSDARG00000068966	si:ch211-261n11.7	0.481313	0.376992	0.352439	0.000433008	1	si:ch211-261n11.7 [Source:ZFIN;Acc:ZDB-GENE-081105-144]	GO:0002741(positive regulation of cytokine secretion involved in immune response);GO:0005515(protein binding);GO:0009897(external side of plasma membrane);GO:0016020(membrane);GO:0016021(integral component of membrane);GO:0046642(negative regulation of alpha-beta T cell proliferation);GO:0050731(positive regulation of peptidyl-tyrosine phosphorylation);GO:0050829(defense response to Gram-negative…	NA	NA	NA
2	ENSDARG00000103900	sept9b	2.07673	1.58648	0.388491	0.000442985	1	septin 9b [Source:ZFIN;Acc:ZDB-GENE-050327-17]	GO:0000166(nucleotide binding);GO:0003924(GTPase activity);GO:0005525(GTP binding);GO:0005940(septin ring);GO:0015630(microtubule cytoskeleton);GO:0031105(septin complex);GO:0032947(protein-containing complex scaffold activity);GO:0061640(cytoskeleton-dependent cytokinesis)	NA	K16938	NA
2	ENSDARG00000100170	pam	0.535152	0.406014	0.398419	0.000472912	1	peptidylglycine alpha-amidating monooxygenase [Source:ZFIN;Acc:ZDB-GENE-090313-384]	GO:0001519(peptide amidation);GO:0003824(catalytic activity);GO:0004497(monooxygenase activity);GO:0004504(peptidylglycine monooxygenase activity);GO:0004598(peptidylamidoglycolate lyase activity);GO:0005507(copper ion binding);GO:0005515(protein binding);GO:0005576(extracellular region);GO:0005886(plasma membrane);GO:0006518(peptide metabolic process);GO:0016020(membrane);GO:0016021(integral com…	NA	K00504	EC:1.14.17.3
2	ENSDARG00000042539	ywhaqa	2.79475	2.03627	0.456788	0.000479816	1	tyrosine 3-monooxygenase/tryptophan 5-monooxygenase activation protein, theta polypeptide a [Source:ZFIN;Acc:ZDB-GENE-040122-5]	GO:0004497(monooxygenase activity);GO:0019904(protein domain specific binding);GO:0055114(oxidation-reduction process)	04110(Cell cycle);04114(Oocyte meiosis)	K16197	NA
2	ENSDARG00000102887	abhd4	1.28738	0.924436	0.47779	0.000487106	1	abhydrolase domain containing 4 [Source:ZFIN;Acc:ZDB-GENE-050417-83]	GO:0005811(lipid droplet);GO:0052689(carboxylic ester hydrolase activity);GO:0055088(lipid homeostasis)	NA	K13698	NA
2	ENSDARG00000010745	dnaja2b	0.948773	0.744651	0.349499	0.000505206	1	DnaJ heat shock protein family (Hsp40) member A2b [Source:ZFIN;Acc:ZDB-GENE-030131-2884]	GO:0005524(ATP binding);GO:0005829(cytosol);GO:0006457(protein folding);GO:0009408(response to heat);GO:0031072(heat shock protein binding);GO:0046872(metal ion binding);GO:0051082(unfolded protein binding)	NA	NA	NA
2	ENSDARG00000041623	mt2	2.69825	1.38538	0.961746	0.000506196	1	metallothionein 2 [Source:ZFIN;Acc:ZDB-GENE-030131-4174]	GO:0001525(angiogenesis);GO:0010038(response to metal ion);GO:0010043(response to zinc ion);GO:0010575(positive regulation of vascular endothelial growth factor production);GO:0046686(response to cadmium ion);GO:0046688(response to copper ion);GO:0046872(metal ion binding);GO:0051597(response to methylmercury);GO:0090050(positive regulation of cell migration involved in sprouting angiogenesis)	NA	K14739	NA
2	ENSDARG00000038577	cox6c	3.53153	2.71272	0.380555	0.000507142	1	cytochrome c oxidase subunit 6C [Source:ZFIN;Acc:ZDB-GENE-040724-95]	GO:0004129(cytochrome-c oxidase activity);GO:0022900(electron transport chain);GO:1902600(proton transmembrane transport)	00190(Oxidative phosphorylation);04260(Cardiac muscle contraction)	K02268	NA
2	ENSDARG00000079387	si:ch211-102c2.4	3.84146	2.55314	0.589381	0.000527951	1	si:ch211-102c2.4 [Source:ZFIN;Acc:ZDB-GENE-030131-8862]	GO:0016020(membrane);GO:0016021(integral component of membrane)	NA	NA	NA
2	ENSDARG00000092362	hsp70.2	1.16733	0.724323	0.688506	0.000572689	1	heat shock cognate 70-kd protein, tandem duplicate 2 [Source:ZFIN;Acc:ZDB-GENE-110405-1]	GO:0000166(nucleotide binding);GO:0005524(ATP binding);GO:0005634(nucleus);GO:0005737(cytoplasm);GO:0009408(response to heat);GO:0009410(response to xenobiotic stimulus);GO:0046686(response to cadmium ion);GO:0048593(camera-type eye morphogenesis)	03040(Spliceosome);04010(MAPK signaling pathway);04141(Protein processing in endoplasmic reticulum);04144(Endocytosis)	K03283	NA
2	ENSDARG00000039392	wnk1b	0.765055	0.613656	0.318133	0.000573301	1	WNK lysine deficient protein kinase 1b [Source:ZFIN;Acc:ZDB-GENE-030131-2656]	GO:0001525(angiogenesis);GO:0004672(protein kinase activity);GO:0004674(protein serine/threonine kinase activity);GO:0005524(ATP binding);GO:0005737(cytoplasm);GO:0005829(cytosol);GO:0006468(protein phosphorylation);GO:0010766(negative regulation of sodium ion transport);GO:0019869(chloride channel inhibitor activity);GO:0019870(potassium channel inhibitor activity);GO:0032414(positive regulation…	NA	K08867	EC:2.7.11.1
2	ENSDARG00000070959	si:ch211-288g17.3	0.920105	0.758096	0.279417	0.000586057	1	si:ch211-288g17.3 [Source:ZFIN;Acc:ZDB-GENE-030131-461]	GO:0003677(DNA binding)	NA	NA	NA
2	ENSDARG00000003032	eif4a1b	2.87352	2.18697	0.393886	0.000587176	1	eukaryotic translation initiation factor 4A1B [Source:ZFIN;Acc:ZDB-GENE-040120-6]	GO:0000166(nucleotide binding);GO:0003676(nucleic acid binding);GO:0003743(translation initiation factor activity);GO:0004004(ATP-dependent RNA helicase activity);GO:0004386(helicase activity);GO:0005524(ATP binding);GO:0006413(translational initiation);GO:0016787(hydrolase activity)	03013(RNA transport)	K03257	NA
2	ENSDARG00000056532	serinc2	0.799577	0.618639	0.370137	0.000608014	1	serine incorporator 2 [Source:ZFIN;Acc:ZDB-GENE-041111-296]	GO:0016020(membrane);GO:0016021(integral component of membrane)	NA	NA	NA
2	ENSDARG00000006553	rras	0.662343	0.497677	0.41237	0.000638645	1	RAS related [Source:ZFIN;Acc:ZDB-GENE-041010-217]	GO:0000166(nucleotide binding);GO:0003924(GTPase activity);GO:0005525(GTP binding);GO:0007165(signal transduction);GO:0007219(Notch signaling pathway);GO:0016020(membrane);GO:0045199(maintenance of epithelial cell apical/basal polarity)	04010(MAPK signaling pathway);04137(Mitophagy - animal);04140(Autophagy - animal);04218(Cellular senescence);04371(Apelin signaling pathway);04625(C-type lectin receptor signaling pathway);04810(Regulation of actin cytoskeleton)	K07830	NA
2	ENSDARG00000037980	elob.1	0.998773	0.785463	0.346614	0.000678547	1	elongin B [Source:ZFIN;Acc:ZDB-GENE-020415-1]	GO:0005515(protein binding);GO:0006368(transcription elongation from RNA polymerase II promoter);GO:0030891(VCB complex);GO:0070449(elongin complex)	04120(Ubiquitin mediated proteolysis)	K03873	NA
2	ENSDARG00000056099	gtf2h5	0.316567	0.26304	0.267229	0.000711879	1	general transcription factor IIH, polypeptide 5 [Source:ZFIN;Acc:ZDB-GENE-041001-144]	GO:0000439(transcription factor TFIIH core complex);GO:0005669(transcription factor TFIID complex);GO:0005675(transcription factor TFIIH holo complex);GO:0006289(nucleotide-excision repair);GO:0006294(nucleotide-excision repair, preincision complex assembly);GO:0006355(regulation of transcription, DNA-templated);GO:0006366(transcription by RNA polymerase II);GO:0070816(phosphorylation of RNA poly…	03022(Basal transcription factors);03420(Nucleotide excision repair)	K10845	NA
2	ENSDARG00000019487	tmx1	0.852608	0.68866	0.308091	0.000727701	1	thioredoxin-related transmembrane protein 1 [Source:ZFIN;Acc:ZDB-GENE-030131-2327]	GO:0005623(cell);GO:0016020(membrane);GO:0016021(integral component of membrane);GO:0045454(cell redox homeostasis)	NA	NA	NA
2	ENSDARG00000110700	COX7A2 (1 of many)	1.10922	0.825437	0.426311	0.000737421	1	cytochrome c oxidase subunit 7A2b [Source:NCBI gene;Acc:100535363]	GO:0004129(cytochrome-c oxidase activity);GO:0005746(mitochondrial respirasome);GO:0009055(electron transfer activity);GO:0016020(membrane);GO:0016021(integral component of membrane);GO:0022900(electron transport chain);GO:1902600(proton transmembrane transport)	NA	NA	NA
2	ENSDARG00000099312	jpt1b	1.1738	0.852351	0.46167	0.000757548	1	Jupiter microtubule associated homolog 1b [Source:ZFIN;Acc:ZDB-GENE-030131-2784]	NA	NA	NA	NA
2	ENSDARG00000099420	nme2b.2	0.33805	0.276319	0.290901	0.000760433	1	NME/NM23 nucleoside diphosphate kinase 2b, tandem duplicate 2 [Source:ZFIN;Acc:ZDB-GENE-000210-33]	GO:0000166(nucleotide binding);GO:0004550(nucleoside diphosphate kinase activity);GO:0005524(ATP binding);GO:0006165(nucleoside diphosphate phosphorylation);GO:0006183(GTP biosynthetic process);GO:0006228(UTP biosynthetic process);GO:0006241(CTP biosynthetic process);GO:0016301(kinase activity);GO:0016310(phosphorylation);GO:0016740(transferase activity)	00230(Purine metabolism);00240(Pyrimidine metabolism);00983(Drug metabolism - other enzymes)	K00940	EC:2.7.4.6
2	ENSDARG00000058044	rab1ba	1.4296	1.16943	0.289807	0.0007676	1	zRAB1B, member RAS oncogene family a [Source:ZFIN;Acc:ZDB-GENE-040426-873]	GO:0000139(Golgi membrane);GO:0003924(GTPase activity);GO:0005525(GTP binding);GO:0006886(intracellular protein transport);GO:0032482(Rab protein signal transduction)	NA	K07874	NA
2	ENSDARG00000038099	gskip	0.854022	0.650356	0.393043	0.000780914	1	gsk3b interacting protein [Source:ZFIN;Acc:ZDB-GENE-040426-2777]	GO:0051018(protein kinase A binding);GO:0060828(regulation of canonical Wnt signaling pathway)	NA	NA	NA
2	ENSDARG00000036104	MYO1G	0.635681	0.49497	0.36096	0.00079195	1	si:dkeyp-92c9.3 [Source:ZFIN;Acc:ZDB-GENE-060503-562]	GO:0000166(nucleotide binding);GO:0003774(motor activity);GO:0003779(actin binding);GO:0005524(ATP binding);GO:0016459(myosin complex)	NA	K10356	NA
2	ENSDARG00000094704	bcl2a	0.675226	0.497888	0.439549	0.000794981	1	BCL2, apoptosis regulator a [Source:ZFIN;Acc:ZDB-GENE-051012-1]	GO:0005741(mitochondrial outer membrane);GO:0006915(apoptotic process);GO:0008630(intrinsic apoptotic signaling pathway in response to DNA damage);GO:0042803(protein homodimerization activity);GO:0042981(regulation of apoptotic process);GO:0043066(negative regulation of apoptotic process);GO:0043154(negative regulation of cysteine-type endopeptidase activity involved in apoptotic process);GO:0046…	04115(p53 signaling pathway);04140(Autophagy - animal);04141(Protein processing in endoplasmic reticulum);04210(Apoptosis);04217(Necroptosis);04261(Adrenergic signaling in cardiomyocytes);04340(Hedgehog signaling pathway);04510(Focal adhesion);04621(NOD-like receptor signaling pathway);04933(AGE-RAGE signaling pathway in diabetic complications);05168(Herpes simplex virus 1 infection)	K02161	NA
2	ENSDARG00000005451	gdi2	1.80399	1.3743	0.392494	0.000819744	1	GDP dissociation inhibitor 2 [Source:ZFIN;Acc:ZDB-GENE-030131-2485]	GO:0005092(GDP-dissociation inhibitor activity);GO:0005093(Rab GDP-dissociation inhibitor activity);GO:0005096(GTPase activator activity);GO:0005737(cytoplasm);GO:0007264(small GTPase mediated signal transduction);GO:0015031(protein transport);GO:0043547(positive regulation of GTPase activity);GO:0050790(regulation of catalytic activity)	NA	K17255	NA
2	ENSDARG00000104030	taf12	0.613763	0.491829	0.319525	0.000832243	1	TAF12 RNA polymerase II, TATA box binding protein (TBP)-associated factor [Source:ZFIN;Acc:ZDB-GENE-031030-5]	GO:0000124(SAGA complex);GO:0003677(DNA binding);GO:0004402(histone acetyltransferase activity);GO:0005669(transcription factor TFIID complex);GO:0006352(DNA-templated transcription, initiation);GO:0017025(TBP-class protein binding);GO:0043966(histone H3 acetylation);GO:0046695(SLIK (SAGA-like) complex);GO:0046982(protein heterodimerization activity);GO:0051123(RNA polymerase II preinitiation com…	03022(Basal transcription factors)	K03126	NA
2	ENSDARG00000075758	ywhabb	2.3066	1.79541	0.361454	0.000845433	1	tyrosine 3-monooxygenase/tryptophan 5-monooxygenase activation protein, beta polypeptide b [Source:ZFIN;Acc:ZDB-GENE-040426-2160]	GO:0019904(protein domain specific binding)	04110(Cell cycle);04114(Oocyte meiosis)	K16197	NA
2	ENSDARG00000096959	si:dkey-29h14.10	0.977897	0.713404	0.454964	0.000855975	1	si:dkey-29h14.10 [Source:ZFIN;Acc:ZDB-GENE-131127-252]	GO:0042981(regulation of apoptotic process)	NA	NA	NA
2	ENSDARG00000079027	chsy1	0.458709	0.357085	0.36131	0.000877335	1	chondroitin sulfate synthase 1 [Source:ZFIN;Acc:ZDB-GENE-030131-3127]	GO:0003007(heart morphogenesis);GO:0005794(Golgi apparatus);GO:0008376(acetylgalactosaminyltransferase activity);GO:0008593(regulation of Notch signaling pathway);GO:0016740(transferase activity);GO:0032580(Golgi cisterna membrane);GO:0033339(pectoral fin development);GO:0050650(chondroitin sulfate proteoglycan biosynthetic process);GO:0060041(retina development in camera-type eye);GO:0060042(ret…	00532(Glycosaminoglycan biosynthesis - chondroitin sulfate / dermatan sulfate)	K13499	2.4.1.226;EC:2.4.1.175
2	ENSDARG00000055620	acad9	0.280442	0.233322	0.265383	0.000878038	1	acyl-CoA dehydrogenase family, member 9 [Source:ZFIN;Acc:ZDB-GENE-060616-196]	GO:0000062(fatty-acyl-CoA binding);GO:0003995(acyl-CoA dehydrogenase activity);GO:0005739(mitochondrion);GO:0016491(oxidoreductase activity);GO:0016627(oxidoreductase activity, acting on the CH-CH group of donors);GO:0017099(very-long-chain-acyl-CoA dehydrogenase activity);GO:0050660(flavin adenine dinucleotide binding);GO:0055114(oxidation-reduction process)	NA	K15980	EC:1.3.99.-
2	ENSDARG00000069111	ikzf2	0.388238	0.319391	0.281616	0.000882272	1	IKAROS family zinc finger 2 [Source:ZFIN;Acc:ZDB-GENE-100922-169]	GO:0003676(nucleic acid binding);GO:0003700(DNA-binding transcription factor activity);GO:0005654(nucleoplasm);GO:0044212(transcription regulatory region DNA binding);GO:0045944(positive regulation of transcription by RNA polymerase II)	NA	K09220	NA
2	ENSDARG00000016350	cap1	0.599805	0.471775	0.346394	0.00088312	1	CAP, adenylate cyclase-associated protein 1 (yeast) [Source:ZFIN;Acc:ZDB-GENE-030131-6459]	GO:0000902(cell morphogenesis);GO:0001756(somitogenesis);GO:0003779(actin binding);GO:0007010(cytoskeleton organization);GO:0007163(establishment or maintenance of cell polarity);GO:0007190(activation of adenylate cyclase activity);GO:0008078(mesodermal cell migration);GO:0008154(actin polymerization or depolymerization);GO:0008179(adenylate cyclase binding);GO:0030036(actin cytoskeleton organiza…	NA	K17261	NA
2	ENSDARG00000038754	plk3	6.59608	5.03097	0.390773	0.000919615	1	polo-like kinase 3 (Drosophila) [Source:ZFIN;Acc:ZDB-GENE-030131-6134]	GO:0000166(nucleotide binding);GO:0000278(mitotic cell cycle);GO:0000922(spindle pole);GO:0004672(protein kinase activity);GO:0004674(protein serine/threonine kinase activity);GO:0005515(protein binding);GO:0005524(ATP binding);GO:0005634(nucleus);GO:0005737(cytoplasm);GO:0005813(centrosome);GO:0006468(protein phosphorylation);GO:0006974(cellular response to DNA damage stimulus);GO:0016301(kinase…	04068(FoxO signaling pathway);04625(C-type lectin receptor signaling pathway)	K08862	EC:2.7.11.21
2	ENSDARG00000100742	reep5	4.73141	3.56895	0.406771	0.000938468	1	receptor accessory protein 5 [Source:ZFIN;Acc:ZDB-GENE-030131-9181]	GO:0016020(membrane);GO:0016021(integral component of membrane)	NA	K17279	NA
2	ENSDARG00000090697	eif3ea	4.82867	3.82776	0.335127	0.000940797	1	eukaryotic translation initiation factor 3, subunit E, a [Source:ZFIN;Acc:ZDB-GENE-030131-3827]	GO:0001732(formation of cytoplasmic translation initiation complex);GO:0002183(cytoplasmic translational initiation);GO:0003743(translation initiation factor activity);GO:0005634(nucleus);GO:0005737(cytoplasm);GO:0005852(eukaryotic translation initiation factor 3 complex);GO:0006412(translation);GO:0006413(translational initiation);GO:0016282(eukaryotic 43S preinitiation complex);GO:0033290(eukar…	03013(RNA transport)	K03250	NA
2	ENSDARG00000078164	znf576.2	0.443799	0.352822	0.330966	0.00101999	1	zinc finger protein 576, tandem duplicate 2 [Source:ZFIN;Acc:ZDB-GENE-030131-1738]	GO:0003676(nucleic acid binding)	NA	NA	NA
2	ENSDARG00000045540	ppp6r2a	0.549206	0.424761	0.370698	0.00103189	1	protein phosphatase 6, regulatory subunit 2a [Source:ZFIN;Acc:ZDB-GENE-030131-5428]	GO:0005575(cellular_component);GO:0008150(biological_process)	NA	K15500	NA
2	ENSDARG00000043531	jun	4.56689	3.33725	0.452553	0.00103225	1	Jun proto-oncogene, AP-1 transcription factor subunit [Source:ZFIN;Acc:ZDB-GENE-030131-7859]	GO:0000122(negative regulation of transcription by RNA polymerase II);GO:0000790(nuclear chromatin);GO:0000978(RNA polymerase II proximal promoter sequence-specific DNA binding);GO:0000981(DNA-binding transcription factor activity, RNA polymerase II-specific);GO:0003677(DNA binding);GO:0003700(DNA-binding transcription factor activity);GO:0003713(transcription coactivator activity);GO:0005654(nuc…	04010(MAPK signaling pathway);04012(ErbB signaling pathway);04137(Mitophagy - animal);04210(Apoptosis);04310(Wnt signaling pathway);04510(Focal adhesion);04530(Tight junction);04620(Toll-like receptor signaling pathway);04621(NOD-like receptor signaling pathway);04625(C-type lectin receptor signaling pathway);04912(GnRH signaling pathway);04933(AGE-RAGE signaling pathway in diabetic complications…	K04448	NA
2	ENSDARG00000010831	churc1	0.457218	0.362497	0.334912	0.00105646	1	churchill domain containing 1 [Source:ZFIN;Acc:ZDB-GENE-041001-150]	GO:0007275(multicellular organism development);GO:0008270(zinc ion binding);GO:0045893(positive regulation of transcription, DNA-templated)	NA	NA	NA
2	ENSDARG00000052438	actr2a	1.72608	1.35773	0.346305	0.00107994	1	ARP2 actin related protein 2a homolog [Source:ZFIN;Acc:ZDB-GENE-040426-2894]	GO:0000166(nucleotide binding);GO:0003779(actin binding);GO:0005524(ATP binding);GO:0005737(cytoplasm);GO:0005856(cytoskeleton);GO:0005885(Arp2/3 protein complex);GO:0007015(actin filament organization);GO:0034314(Arp2/3 complex-mediated actin nucleation)	04530(Tight junction)	K17260	NA
2	ENSDARG00000038025	cbx7a	0.92417	0.661228	0.48301	0.00108485	1	chromobox homolog 7a [Source:ZFIN;Acc:ZDB-GENE-050417-400]	GO:0005634(nucleus)	NA	K11454	NA
2	ENSDARG00000045364	trappc3	0.43408	0.347997	0.318885	0.00110236	1	trafficking protein particle complex 3 [Source:ZFIN;Acc:ZDB-GENE-040801-120]	GO:0005783(endoplasmic reticulum);GO:0005794(Golgi apparatus);GO:0005829(cytosol);GO:0006888(endoplasmic reticulum to Golgi vesicle-mediated transport);GO:0006891(intra-Golgi vesicle-mediated transport);GO:0016192(vesicle-mediated transport);GO:0017112(Rab guanyl-nucleotide exchange factor activity);GO:0030008(TRAPP complex);GO:0033106(cis-Golgi network membrane);GO:0048193(Golgi vesicle transpor…	NA	K20302	NA
2	ENSDARG00000077897	znf296	0.718588	0.535553	0.424136	0.00112297	1	zinc finger protein 296 [Source:ZFIN;Acc:ZDB-GENE-050419-201]	GO:0003676(nucleic acid binding);GO:0003700(DNA-binding transcription factor activity);GO:0005634(nucleus);GO:0006355(regulation of transcription, DNA-templated);GO:0043565(sequence-specific DNA binding)	NA	NA	NA
2	ENSDARG00000030440	rsrp1	2.10692	1.48864	0.501138	0.00113089	1	arginine/serine-rich protein 1 [Source:ZFIN;Acc:ZDB-GENE-060616-210]	NA	NA	NA	NA
2	ENSDARG00000034270	ogdha	1.25845	1.01404	0.311536	0.00113874	1	oxoglutarate (alpha-ketoglutarate) dehydrogenase a (lipoamide) [Source:ZFIN;Acc:ZDB-GENE-030131-2143]	GO:0004591(oxoglutarate dehydrogenase (succinyl-transferring) activity);GO:0005739(mitochondrion);GO:0006099(tricarboxylic acid cycle);GO:0016624(oxidoreductase activity, acting on the aldehyde or oxo group of donors, disulfide as acceptor);GO:0030976(thiamine pyrophosphate binding);GO:0045252(oxoglutarate dehydrogenase complex);GO:0055114(oxidation-reduction process);GO:0060047(heart contraction)	00020(Citrate cycle (TCA cycle))	K00164	EC:1.2.4.2
2	ENSDARG00000008748	ube2na	1.34686	1.01558	0.4073	0.00115422	1	ubiquitin-conjugating enzyme E2Na [Source:ZFIN;Acc:ZDB-GENE-040426-2873]	GO:0000166(nucleotide binding);GO:0000209(protein polyubiquitination);GO:0005524(ATP binding);GO:0005634(nucleus);GO:0006301(postreplication repair);GO:0016740(transferase activity);GO:0042769(DNA damage response, detection of DNA damage);GO:0061631(ubiquitin conjugating enzyme activity);GO:0070534(protein K63-linked ubiquitination)	04120(Ubiquitin mediated proteolysis)	K10580	EC:2.3.2.23
2	ENSDARG00000099786	actn4	0.636204	0.484013	0.394441	0.00119855	1	actinin, alpha 4 [Source:ZFIN;Acc:ZDB-GENE-030131-940]	GO:0003779(actin binding);GO:0005509(calcium ion binding);GO:0005515(protein binding);GO:0005575(cellular_component)	04510(Focal adhesion);04520(Adherens junction);04530(Tight junction);04810(Regulation of actin cytoskeleton)	K05699	NA
2	ENSDARG00000029818	srsf5a	5.0523	4.04375	0.321248	0.0013051	1	serine and arginine rich splicing factor 5a [Source:ZFIN;Acc:ZDB-GENE-030131-7336]	GO:0003676(nucleic acid binding);GO:0003723(RNA binding);GO:0005575(cellular_component);GO:0008150(biological_process)	03040(Spliceosome);05168(Herpes simplex virus 1 infection)	K12893	NA
2	ENSDARG00000026680	slc25a14	0.529589	0.429237	0.303097	0.00131464	1	solute carrier family 25 (mitochondrial carrier, brain), member 14 [Source:ZFIN;Acc:ZDB-GENE-040426-749]	GO:0005743(mitochondrial inner membrane);GO:0006839(mitochondrial transport);GO:0008272(sulfate transport);GO:0015116(sulfate transmembrane transporter activity);GO:0015117(thiosulfate transmembrane transporter activity);GO:0015131(oxaloacetate transmembrane transporter activity);GO:0015140(malate transmembrane transporter activity);GO:0015141(succinate transmembrane transporter activity);GO:0015…	NA	K15106	NA
2	ENSDARG00000105667	CU972454.4	0.63022	0.488078	0.368745	0.00132519	1	NA	NA	NA	NA	NA
2	ENSDARG00000054804	anp32e	0.750311	0.592356	0.341025	0.00137917	1	acidic (leucine-rich) nuclear phosphoprotein 32 family, member E [Source:ZFIN;Acc:ZDB-GENE-040426-2448]	GO:0000812(Swr1 complex);GO:0005515(protein binding);GO:0005634(nucleus);GO:0005737(cytoplasm);GO:0006325(chromatin organization);GO:0042393(histone binding);GO:0043486(histone exchange)	NA	K18648	NA
2	ENSDARG00000022456	eno1a	5.40017	4.18509	0.367748	0.00141219	1	enolase 1a, (alpha) [Source:ZFIN;Acc:ZDB-GENE-030131-6048]	GO:0000015(phosphopyruvate hydratase complex);GO:0000287(magnesium ion binding);GO:0004634(phosphopyruvate hydratase activity);GO:0006096(glycolytic process)	00010(Glycolysis / Gluconeogenesis);03018(RNA degradation)	K01689	EC:4.2.1.11
2	ENSDARG00000075867	mrtfaa	0.407954	0.337847	0.272034	0.00142242	1	myocardin related transcription factor Aa [Source:ZFIN;Acc:ZDB-GENE-121205-3]	GO:0003713(transcription coactivator activity);GO:0003779(actin binding);GO:0003785(actin monomer binding);GO:0004864(protein phosphatase inhibitor activity);GO:0005634(nucleus);GO:0005737(cytoplasm);GO:0010735(positive regulation of transcription via serum response element binding);GO:0032515(negative regulation of phosphoprotein phosphatase activity);GO:0051145(smooth muscle cell differentiatio…	NA	K22525	NA
2	ENSDARG00000022438	cox6a1	2.81619	2.15251	0.387727	0.0014424	1	cytochrome c oxidase subunit 6A1 [Source:ZFIN;Acc:ZDB-GENE-030131-7715]	GO:0004129(cytochrome-c oxidase activity);GO:0005739(mitochondrion);GO:0005743(mitochondrial inner membrane);GO:0005751(mitochondrial respiratory chain complex IV);GO:0006123(mitochondrial electron transport, cytochrome c to oxygen);GO:0009060(aerobic respiration);GO:0016020(membrane);GO:0030234(enzyme regulator activity);GO:0050790(regulation of catalytic activity);GO:1902600(proton transmembran…	00190(Oxidative phosphorylation);04260(Cardiac muscle contraction)	K02266	NA
2	ENSDARG00000057698	ctsd	0.844193	0.641037	0.397166	0.00145958	1	cathepsin D [Source:ZFIN;Acc:ZDB-GENE-010131-8]	GO:0003406(retinal pigment epithelium development);GO:0004190(aspartic-type endopeptidase activity);GO:0005764(lysosome);GO:0006508(proteolysis);GO:0008233(peptidase activity);GO:0009617(response to bacterium);GO:0016787(hydrolase activity);GO:0030163(protein catabolic process);GO:0061061(muscle structure development)	04140(Autophagy - animal);04142(Lysosome);04210(Apoptosis)	K01379	EC:3.4.23.5
2	ENSDARG00000041022	pdcd4b	0.799673	0.612392	0.384954	0.00154888	1	programmed cell death 4b [Source:ZFIN;Acc:ZDB-GENE-030131-9847]	GO:0003171(atrioventricular valve development);GO:0005634(nucleus);GO:0005829(cytosol);GO:0045892(negative regulation of transcription, DNA-templated)	NA	NA	NA
2	ENSDARG00000061048	ranbp9	0.779146	0.621113	0.327037	0.00160859	1	RAN binding protein 9 [Source:ZFIN;Acc:ZDB-GENE-021030-5]	GO:0005515(protein binding)	NA	NA	NA
2	ENSDARG00000013317	pygmb	0.468938	0.365977	0.357642	0.0016163	1	phosphorylase, glycogen, muscle b [Source:ZFIN;Acc:ZDB-GENE-040426-1206]	GO:0004645(phosphorylase activity);GO:0005737(cytoplasm);GO:0005975(carbohydrate metabolic process);GO:0005980(glycogen catabolic process);GO:0008184(glycogen phosphorylase activity);GO:0016740(transferase activity);GO:0016757(transferase activity, transferring glycosyl groups);GO:0030170(pyridoxal phosphate binding);GO:0102250(linear malto-oligosaccharide phosphorylase activity);GO:0102499(SHG a…	NA	NA	NA
2	ENSDARG00000020625	jak1	6.8245	5.23684	0.382027	0.00164735	1	Janus kinase 1 [Source:ZFIN;Acc:ZDB-GENE-980526-142]	GO:0000166(nucleotide binding);GO:0004672(protein kinase activity);GO:0004713(protein tyrosine kinase activity);GO:0004715(non-membrane spanning protein tyrosine kinase activity);GO:0005524(ATP binding);GO:0005856(cytoskeleton);GO:0006468(protein phosphorylation);GO:0016020(membrane);GO:0016301(kinase activity);GO:0016310(phosphorylation);GO:0016740(transferase activity);GO:0018108(peptidyl-tyros…	04217(Necroptosis);04621(NOD-like receptor signaling pathway);05168(Herpes simplex virus 1 infection)	K11217	EC:2.7.10.2
2	ENSDARG00000036628	cd74b	12.0753	9.97758	0.275303	0.00167688	1	CD74 molecule, major histocompatibility complex, class II invariant chain b [Source:ZFIN;Acc:ZDB-GENE-990910-10]	GO:0005623(cell);GO:0006886(intracellular protein transport);GO:0006955(immune response);GO:0016020(membrane);GO:0016021(integral component of membrane);GO:0019882(antigen processing and presentation);GO:0042289(MHC class II protein binding);GO:0048839(inner ear development);GO:0048884(neuromast development)	NA	NA	NA
2	ENSDARG00000074183	si:dkey-172j4.3	0.644415	0.515169	0.322945	0.00184214	1	si:dkey-172j4.3 [Source:ZFIN;Acc:ZDB-GENE-081104-24]	GO:0000166(nucleotide binding);GO:0003951(NAD+ kinase activity);GO:0004143(diacylglycerol kinase activity);GO:0005524(ATP binding);GO:0007165(signal transduction);GO:0007205(protein kinase C-activating G protein-coupled receptor signaling pathway);GO:0016301(kinase activity);GO:0016310(phosphorylation);GO:0016740(transferase activity);GO:0035556(intracellular signal transduction);GO:0046339(diacy…	00561(Glycerolipid metabolism);00564(Glycerophospholipid metabolism);04070(Phosphatidylinositol signaling system)	K00901	EC:2.7.1.107
2	ENSDARG00000007923	ptpn1	1.2556	1.01143	0.311985	0.00185484	1	protein tyrosine phosphatase, non-receptor type 1 [Source:ZFIN;Acc:ZDB-GENE-980605-23]	GO:0004721(phosphoprotein phosphatase activity);GO:0004725(protein tyrosine phosphatase activity);GO:0006470(protein dephosphorylation);GO:0016311(dephosphorylation);GO:0016787(hydrolase activity);GO:0016791(phosphatase activity);GO:0035335(peptidyl-tyrosine dephosphorylation)	04520(Adherens junction);04910(Insulin signaling pathway)	K05696	EC:3.1.3.48
2	ENSDARG00000091348	rtn3	0.437073	0.347913	0.329148	0.00186347	1	reticulon 3 [Source:ZFIN;Acc:ZDB-GENE-030710-5]	GO:0005783(endoplasmic reticulum);GO:0005789(endoplasmic reticulum membrane);GO:0016020(membrane);GO:0016021(integral component of membrane)	NA	K20723	NA
2	ENSDARG00000079105	mhc2dab	3.10682	2.00091	0.634781	0.00187904	1	major histocompatibility complex class II DAB gene [Source:ZFIN;Acc:ZDB-GENE-980526-200]	GO:0003674(molecular_function);GO:0006955(immune response);GO:0016020(membrane);GO:0016021(integral component of membrane);GO:0019882(antigen processing and presentation);GO:0042613(MHC class II protein complex)	04145(Phagosome);04514(Cell adhesion molecules (CAMs));04672(Intestinal immune network for IgA production);05168(Herpes simplex virus 1 infection)	K06752	NA
2	ENSDARG00000028699	crkl	0.540532	0.428295	0.335777	0.00195412	1	v-crk avian sarcoma virus CT10 oncogene homolog-like [Source:ZFIN;Acc:ZDB-GENE-040426-2951]	GO:0005515(protein binding);GO:0005575(cellular_component);GO:0007520(myoblast fusion);GO:0072114(pronephros morphogenesis)	04010(MAPK signaling pathway);04012(ErbB signaling pathway);04510(Focal adhesion);04810(Regulation of actin cytoskeleton);04910(Insulin signaling pathway)	K04438	NA
2	ENSDARG00000031246	hbegfb	0.398081	0.331805	0.262729	0.00201596	1	heparin-binding EGF-like growth factor b [Source:ZFIN;Acc:ZDB-GENE-070820-6]	GO:0005154(epidermal growth factor receptor binding);GO:0005615(extracellular space);GO:0007173(epidermal growth factor receptor signaling pathway);GO:0008083(growth factor activity);GO:0008284(positive regulation of cell population proliferation);GO:0010469(regulation of signaling receptor activity);GO:0016020(membrane);GO:0016021(integral component of membrane);GO:0060047(heart contraction)	NA	NA	NA
2	ENSDARG00000103718	chmp5b	2.55449	2.0365	0.326943	0.00213731	1	charged multivesicular body protein 5b [Source:ZFIN;Acc:ZDB-GENE-040426-1374]	GO:0003674(molecular_function);GO:0005737(cytoplasm);GO:0005768(endosome);GO:0005829(cytosol);GO:0007034(vacuolar transport);GO:0010008(endosome membrane);GO:0015031(protein transport);GO:0016020(membrane)	04144(Endocytosis);04217(Necroptosis)	K12198	NA
2	ENSDARG00000103483	litaf	3.09359	2.45523	0.333425	0.00215213	1	lipopolysaccharide-induced TNF factor [Source:ZFIN;Acc:ZDB-GENE-040704-23]	GO:0000139(Golgi membrane);GO:0003677(DNA binding);GO:0005634(nucleus);GO:0005737(cytoplasm);GO:0005764(lysosome);GO:0005765(lysosomal membrane);GO:0005768(endosome);GO:0005794(Golgi apparatus);GO:0005886(plasma membrane);GO:0008270(zinc ion binding);GO:0009898(cytoplasmic side of plasma membrane);GO:0010008(endosome membrane);GO:0016020(membrane);GO:0031901(early endosome membrane);GO:0031902(la…	04142(Lysosome)	K19363	NA
2	ENSDARG00000056141	coq10b	1.49437	1.1683	0.355128	0.00216182	1	coenzyme Q10B [Source:ZFIN;Acc:ZDB-GENE-050417-263]	NA	NA	K18588	NA
2	ENSDARG00000010717	chchd10	0.472932	0.376842	0.327673	0.002195	1	coiled-coil-helix-coiled-coil-helix domain containing 10 [Source:ZFIN;Acc:ZDB-GENE-040426-1753]	GO:0005634(nucleus);GO:0005739(mitochondrion);GO:0007005(mitochondrion organization);GO:0007409(axonogenesis);GO:0014866(skeletal myofibril assembly)	NA	K22759	NA
2	ENSDARG00000075327	dock10	0.985823	0.773839	0.349296	0.00223574	1	dedicator of cytokinesis 10 [Source:ZFIN;Acc:ZDB-GENE-130530-773]	GO:0005085(guanyl-nucleotide exchange factor activity);GO:0007264(small GTPase mediated signal transduction)	NA	K21853	NA
2	ENSDARG00000070161	vamp3	1.41211	1.08882	0.375086	0.00226973	1	vesicle-associated membrane protein 3 (cellubrevin) [Source:ZFIN;Acc:ZDB-GENE-040625-45]	GO:0016020(membrane);GO:0016021(integral component of membrane);GO:0016192(vesicle-mediated transport)	04130(SNARE interactions in vesicular transport);04145(Phagosome)	K13505	NA
2	ENSDARG00000053217	cox7a2a	2.90047	2.38124	0.284569	0.00230989	1	cytochrome c oxidase subunit 7A2a [Source:ZFIN;Acc:ZDB-GENE-050522-153]	GO:0002082(regulation of oxidative phosphorylation);GO:0004129(cytochrome-c oxidase activity);GO:0005746(mitochondrial respirasome);GO:0009055(electron transfer activity);GO:0016020(membrane);GO:0016021(integral component of membrane);GO:0022900(electron transport chain);GO:0097250(mitochondrial respirasome assembly);GO:1902600(proton transmembrane transport)	00190(Oxidative phosphorylation);04260(Cardiac muscle contraction)	K02270	NA
2	ENSDARG00000040401	slc25a20	0.622856	0.484359	0.362823	0.00242586	1	solute carrier family 25 (carnitine/acylcarnitine translocase), member 20 [Source:ZFIN;Acc:ZDB-GENE-040426-1869]	GO:0016020(membrane);GO:0016021(integral component of membrane);GO:0022857(transmembrane transporter activity);GO:0055085(transmembrane transport)	NA	K15109	NA
2	ENSDARG00000099966	polr2a	1.51332	1.18111	0.357566	0.00243051	1	polymerase (RNA) II (DNA directed) polypeptide A [Source:ZFIN;Acc:ZDB-GENE-041008-78]	GO:0001055(RNA polymerase II activity);GO:0003677(DNA binding);GO:0003899(DNA-directed 5'-3' RNA polymerase activity);GO:0005665(RNA polymerase II, core complex);GO:0006351(transcription, DNA-templated);GO:0006366(transcription by RNA polymerase II);GO:0016740(transferase activity);GO:0016779(nucleotidyltransferase activity)	03020(RNA polymerase)	K03006	EC:2.7.7.6
2	ENSDARG00000017500	rock2a	0.359483	0.293541	0.292361	0.00245448	1	rho-associated, coiled-coil containing protein kinase 2a [Source:ZFIN;Acc:ZDB-GENE-030115-3]	GO:0000166(nucleotide binding);GO:0004672(protein kinase activity);GO:0004674(protein serine/threonine kinase activity);GO:0005515(protein binding);GO:0005524(ATP binding);GO:0005773(vacuole);GO:0005856(cytoskeleton);GO:0005886(plasma membrane);GO:0006468(protein phosphorylation);GO:0006939(smooth muscle contraction);GO:0007039(protein catabolic process in the vacuole);GO:0007266(Rho protein sign…	04270(Vascular smooth muscle contraction);04310(Wnt signaling pathway);04510(Focal adhesion);04530(Tight junction);04810(Regulation of actin cytoskeleton);05132(Salmonella infection)	K17388	EC:2.7.11.1
2	ENSDARG00000104169	si:ch211-212k18.4	1.08884	0.826435	0.397815	0.00256446	1	si:ch211-212k18.4 [Source:ZFIN;Acc:ZDB-GENE-141216-265]	GO:0003676(nucleic acid binding);GO:0005634(nucleus);GO:0008270(zinc ion binding);GO:0008380(RNA splicing);GO:0046872(metal ion binding)	NA	NA	NA
2	ENSDARG00000017105	vaspb	0.303932	0.250143	0.280998	0.00282847	1	vasodilator stimulated phosphoprotein b [Source:ZFIN;Acc:ZDB-GENE-030131-7118]	GO:0008154(actin polymerization or depolymerization)	04510(Focal adhesion);04530(Tight junction)	K06274	NA
2	ENSDARG00000102908	il16	0.95321	0.733638	0.377725	0.00290171	1	interleukin 16 [Source:ZFIN;Acc:ZDB-GENE-130103-3]	GO:0005515(protein binding)	04060(Cytokine-cytokine receptor interaction)	K22628	NA
2	ENSDARG00000005675	sec61a1l	1.04748	0.820547	0.352271	0.00290347	1	Sec61 translocon alpha 1 subunit, like [Source:ZFIN;Acc:ZDB-GENE-021016-2]	GO:0015031(protein transport);GO:0016020(membrane);GO:0016021(integral component of membrane)	03060(Protein export);04141(Protein processing in endoplasmic reticulum);04145(Phagosome)	K10956	NA
2	ENSDARG00000034427	jpt2	1.18859	0.905575	0.392341	0.0029109	1	Jupiter microtubule associated homolog 2 [Source:ZFIN;Acc:ZDB-GENE-030131-599]	GO:0003674(molecular_function);GO:0005575(cellular_component);GO:0008150(biological_process)	NA	NA	NA
[truncated: 1,885 more rows]

## Sheet: The DEGs in CD8+ T cells
The DEGs in Cd8+ T cells (scRNA-seq analysis)
[truncated: 531 more rows]

## Sheet: The DEGs in ILC3-like cells
The DEGs in ILC3-like cells (scRNA-seq analysis)
[truncated: 712 more rows]

[truncated: 3 more sheets: The DEGs in NKT cells, The DEGs in Th2 cells, The DEGs in Enterocytes]
